# Supplementary material for: Functional Integration of mRNA Translational Control Programs
Source: Biomolecules. 2015 Jul 21;5(3):1580–99. doi: 10.3390/biom5031580 (PMC4598765; doi:10.3390/biom5031580)
Supplement: Supplementary File 1 [file biomolecules-05-01580-s001.xlsx]

## Sheet: General Statistics
Homo Sapiens 66974			Mus musculus 26420			Xenopus 26511
pbe	15156		pbe	5444		pbe	6312
& mbe	14437		& mbe	5136		& mbe	5521
NOT mbe	719		NOT mbe	308		NOT mbe	791
& cpe	13536		& cpe	4693		& cpe	5427
NOT cpe	1620		NOT cpe	751		NOT cpe	885
& tcs	9462		& tcs	3101		& tcs	2738
NOT tcs	5694		NOT tcs	2343		NOT tcs	3574
NOT (mbe or cpe)	409		NOT (mbe or cpe)	174		NOT (mbe or cpe)	314
NOT (mbe or tcs)	613		NOT (mbe or tcs)	272		NOT (mbe or tcs)	638
NOT (cpe or tcs)	1287		NOT (cpe or tcs)	606		NOT (cpe or tcs)	735
NOT (mbe or cpe or tcs)	373		NOT (mbe or cpe or tcs)	162		NOT (mbe or cpe or tcs)	273
mbe	50101		mbe	20079		mbe	18912
& pbe	14437		& pbe	5136		& pbe	5521
NOT pbe	35664		NOT pbe	14943		NOT pbe	13391
& cpe	37483		& cpe	14215		& cpe	15101
NOT cpe	12618		NOT cpe	5864		NOT cpe	3811
& tcs	21858		& tcs	8358		& tcs	6861
NOT tcs	28243		NOT tcs	11721		NOT tcs	12051
NOT (pbe or cpe)	11407		NOT (pbe or cpe)	5287		NOT (pbe or cpe)	3240
NOT (pbe or tcs)	23162		NOT (pbe or tcs)	9650		NOT (pbe or tcs)	9115
NOT (cpe or tcs)	10670		NOT (cpe or tcs)	4790		NOT (cpe or tcs)	3233
NOT (pbe or cpe or tcs)	9756		NOT (pbe or cpe or tcs)	4346		NOT (pbe or cpe or tcs)	2771
cpe	41567		cpe	15698		cpe	18383
& pbe	13536		& pbe	4693		& pbe	5427
NOT pbe	28031		NOT pbe	11005		NOT pbe	12956
& mbe	37483		& mbe	14215		& mbe	15101
NOT mbe	4084		NOT mbe	1483		NOT mbe	3282
& tcs	20638		& tcs	7518		& tcs	6926
NOT tcs	20929		NOT tcs	8180		NOT tcs	11457
NOT (pbe or mbe)	3774		NOT (pbe or mbe)	1349		NOT (pbe or mbe)	2805
NOT (pbe or tcs)	16522		NOT (pbe or tcs)	6443		NOT (pbe or tcs)	8618
NOT (mbe or tcs)	3356		NOT (mbe or tcs)	1249		NOT (mbe or tcs)	2639
NOT (pbe or mbe or tcs)	3116		NOT (pbe or mbe or tcs)	1139		NOT (pbe or mbe or tcs)	2274
tcs	23235		tcs	8880		tcs	7827
& pbe	9462		& pbe	3101		& pbe	2738
NOT pbe	13773		NOT pbe	5779		NOT pbe	5089
& mbe	21858		& mbe	8358		& mbe	6861
NOT mbe	1377		NOT mbe	522		NOT mbe	966
& cpe	20638		& cpe	7518		& cpe	6926
NOT cpe	2597		NOT cpe	1362		NOT cpe	901
NOT (pbe or mbe)	1271		NOT (pbe or mbe)	486		NOT (pbe or mbe)	813
NOT (pbe or cpe)	2264		NOT (pbe or cpe)	1217		NOT (pbe or cpe)	751
NOT (mbe or cpe)	649		NOT (mbe or cpe)	288		NOT (mbe or cpe)	323
NOT (pbe or mbe or cpe)	613		NOT (pbe or mbe or cpe)	276		NOT (pbe or mbe or cpe)	282
NO match	11767		NO match	4408		NO match	3721

## Sheet: Homo sapiens
Data analysis information:
Number of 3'UTR sequences analysed	66974
Analysed PatSearch output	4
Sequence without match	11767
File name	Matched sequences
mbe	50101
cpe	41567
pbe	15156
tcs	23235
Query Sequence & Length	mbe	cpe	pbe	tcs
3HSAR000009122_CR000055948 4598	atagt [1551,1555]/gtagt [3109,3113]/atagt [3467,3471]/gtagt [4040,4044]	ttttat [2231,2236]/ttttat [2967,2972]/ttttat [3018,3023]/ttttat [3054,3059]/ttttaat [4573,4579]	none	tttgtct [587,593]/tttatct [3714,3720]
3HSAR000041861_CR000586328 2565	atagt [1013,1017]/gtag [1202,1205]/gtag [1432,1435]/gtag [1749,1752]/gtag [2219,2222]/gtag [2312,2315]	ttttat [743,748]/ttttaat [2417,2423]	none	none
3HSAR000011384_CR000069408 5952	atagt [10,14]/atagt [1076,1080]/gtagt [1273,1277]/gtagt [1289,1293]/atagt [1795,1799]/gtagt [2425,2429]/atagt [2549,2553]/atagt [4149,4153]/gtagt [4866,4870]/gtagt [5325,5329]/gtag [5430,5433]	ttttat [309,314]/ttttat [2240,2245]/ttttat [3966,3971]/ttttat [4391,4396]/ttttat [4617,4622]/ttttat [4623,4628]/ttttat [5881,5886]	none	tttgtct [189,195]/tttatct [257,263]/tttgtct [737,743]/tttgtct [1681,1687]
3HSAR000046105_CR000632009 240	none	none	none	none
3HSAR000016062_CR000098177 1248	atagt [960,964]	ttttat [181,186]/ttttat [951,956]	none	none
3HSAR000060613_CR001380540 1933	gtagt [1023,1027]/gtagt [1779,1783]	ttttaat [291,297]/ttttaaat [1218,1225]	none	attatct [244,250]
3HSAR000046061_CR000631708 2384	gtagt [164,168]/gtag [633,636]/gtag [921,924]	none	none	none
3HSAR000027840_CR000170295 656	gtag [108,111]	ttttat [514,519]/ttttat [548,553]/ttttat [615,620]	none	none
3HSAR000052550_CR000751120 2395	atagt [321,325]/atagt [2221,2225]	ttttat [90,95]/ttttat [2265,2270]/ttttaat [2365,2371]	tgtagata [1390,1397]	tttgtct [793,799]
3HSAR000028334_CR000173299 85	none	none	none	none
3HSAR000023933_CR000146464 306	gtagt [160,164]	none	none	none
3HSAR000061199_CR001384338 2810	gtagt [2537,2541]	ttttat [1071,1076]/ttttat [2288,2293]/ttttat [2400,2405]/ttttat [2566,2571]/ttttat [2795,2800]	none	none
3HSAR000054982_CR000795658 1281	gttagt [928,933]	none	none	attgtct [960,966]
3HSAR000028775_CR000175977 524	atagt [35,39]/attagt [241,246]/gtag [431,434]	ttttat [220,225]	none	none
3HSAR000015884_CR000097052 2979	atagt [6,10]/gtagt [66,70]/atagt [195,199]/gtagt [1047,1051]/gtagt [1057,1061]/attagt [1165,1170]/attagt [1773,1778]/gttagt [1909,1914]/gtttagt [2012,2018]/gtag [2602,2605]	ttttat [304,309]/ttttat [563,568]/ttttat [1711,1716]/ttttat [2092,2097]/ttttat [2965,2970]	tgtaaata [737,744]	attgtct [1825,1831]
3HSAR000014879_CR000090826 4082	gtagt [129,133]/atagt [1529,1533]/gtagt [1812,1816]/gtagt [1894,1898]/gtagt [2437,2441]/gtagt [2978,2982]/atagt [4056,4060]	ttttat [450,455]/ttttat [1263,1268]/ttttat [1729,1734]/ttttat [2099,2104]/ttttat [2206,2211]/ttttat [2614,2619]/ttttat [2769,2774]/ttttat [3290,3295]/ttttat [3710,3715]/ttttat [4029,4034]	tgtaaata [140,147]/tgtatata [496,503]/tgtatata [2874,2881]	tttgtct [1886,1892]/tttatct [2207,2213]/tttatct [2688,2694]/attatct [2983,2989]
3HSAR000062236_CR001391726 1137	gtag [496,499]/gtag [866,869]	none	none	tttgtct [718,724]
3HSAR000004079_CR000025552 430	none	ttttat [230,235]	none	tttatct [231,237]
3HSAR000063820_CR001402961 1186	attagt [373,378]/attagt [452,457]/attagt [662,667]/gtag [1083,1086]	ttttat [31,36]/ttttat [86,91]/ttttat [106,111]/ttttat [124,129]/ttttat [1023,1028]	tgtagata [427,434]	attatct [495,501]
3HSAR000016073_CR000098246 881	none	none	tgtaaata [806,813]	none
3HSAR000029418_CR000179864 693	gtag [267,270]	ttttaaat [661,668]	none	attgtct [514,520]/tttgtct [653,659]
3HSAR000000402_CR000002445 1022	none	none	none	none
3HSAR000029636_CR000181189 122	gttagt [98,103]	none	none	none
3HSAR000061206_CR001384379 619	gtagt [92,96]/gtag [351,354]	none	none	tttgtct [34,40]/tttgtct [101,107]
3HSAR000051222_CR000741441 533	gtagt [496,500]	none	none	none
3HSAR000035661_CR000227502 3179	atagt [302,306]/gtag [625,628]/gtag [833,836]/gtag [880,883]/gtag [2187,2190]	ttttat [524,529]/ttttaat [3142,3148]	none	none
3HSAR000005104_CR000031831 193	attagt [19,24]/gtag [159,162]	ttttat [131,136]	none	attatct [73,79]
3HSAR000032243_CR000197110 28	atagt [5,9]	none	none	none
3HSAR000007862_CR000048584 450	none	ttttat [79,84]/ttttaat [364,370]	none	tttatct [65,71]
3HSAR000017113_CR000104711 1365	atagt [67,71]/atagt [702,706]/gtag [1211,1214]	ttttat [397,402]/ttttat [1333,1338]	none	none
3HSAR000002282_CR000014287 350	atagt [138,142]	ttttat [28,33]/ttttat [68,73]/ttttat [290,295]	tgtaaata [142,149]/tgtacata [186,193]	none
3HSAR000030138_CR000184315 1421	gtag [124,127]/gtag [1391,1394]	ttttaagt [1165,1172]	none	attatct [732,738]/attgtct [1235,1241]
3HSAR000040453_CR000371255 1028	atagt [117,121]/gtagt [141,145]/gtagt [274,278]/gtag [528,531]/gtag [692,695]/gtag [746,749]	ttttat [280,285]	none	tttgtct [983,989]
3HSAR000027731_CR000169665 2356	gtagt [500,504]/atagt [569,573]/atagt [1211,1215]/gtagt [1657,1661]/gtagt [1870,1874]/attagt [2285,2290]	ttttat [1534,1539]/ttttat [1635,1640]/ttttat [2184,2189]/ttttact [2329,2335]	none	attgtct [2123,2129]
3HSAR000028295_CR000173063 1498	gtagt [138,142]/atagt [682,686]/atagt [904,908]/atagt [977,981]/atagt [1182,1186]/gtagt [1265,1269]/gtag [1413,1416]	ttttat [122,127]/ttttat [364,369]/ttttat [1114,1119]	none	none
3HSAR000011618_CR000070834 535	atagt [517,521]	ttttat [242,247]	none	none
3HSAR000027887_CR000170585 2433	gtagt [1313,1317]/atagt [1998,2002]/atagt [2096,2100]	ttttat [923,928]/ttttat [1101,1106]	none	attatct [1986,1992]
3HSAR000017590_CR000107652 6017	atagt [825,829]/atagt [1337,1341]/gtagt [1427,1431]/atagt [1523,1527]/atagt [1551,1555]/atagt [1829,1833]/atagt [1900,1904]/atagt [2069,2073]/atagt [2408,2412]/atagt [3914,3918]/gtagt [3939,3943]/atagt [4588,4592]/atagt [4865,4869]/gtagt [5180,5184]/gtagt [5200,5204]/gtagt [5238,5242]/atagt [5468,5472]/gtagt [5597,5601]/gtag [5707,5710]	ttttat [713,718]/ttttat [2365,2370]/ttttat [3199,3204]/ttttat [4817,4822]/ttttat [4899,4904]/ttttat [5725,5730]/ttttat [5981,5986]	tgtatata [3263,3270]/tgtatata [5211,5218]	tttatct [560,566]/attatct [881,887]/tttgtct [2770,2776]/tttatct [5274,5280]/attgtct [5389,5395]/tttatct [5892,5898]
3HSAR000027295_CR000167030 206	none	ttttat [169,174]	none	tttgtct [22,28]
3HSAR000060730_CR001381217 154	gtagt [102,106]	ttttaat [135,141]	none	none
3HSAR000020263_CR000124013 2048	gtagt [472,476]/gtagt [1983,1987]	ttttaat [182,188]	tgtaaata [701,708]	none
3HSAR000063937_CR001403808 2054	atagt [1539,1543]/gtag [1811,1814]/gtag [1868,1871]	ttttat [2043,2048]	none	none
3HSAR000064129_CR001405185 584	gtag [182,185]	none	tgtatata [311,318]	tttgtct [469,475]
3HSAR000009036_CR000055428 2395	gtagt [211,215]/gtagt [878,882]/atagt [1576,1580]/gtagt [1865,1869]/atagt [2087,2091]/atagt [2340,2344]	ttttat [171,176]/ttttat [808,813]/ttttat [822,827]/ttttat [1030,1035]/ttttat [1455,1460]/ttttat [1465,1470]/ttttat [1891,1896]/ttttat [1924,1929]/ttttat [2296,2301]/ttttat [2367,2372]	tgtaaata [609,616]/tgtatata [1130,1137]	tttgtct [737,743]
3HSAR000027808_CR000170105 858	atagt [41,45]/gtag [426,429]/gtag [534,537]	ttttat [37,42]/ttttat [339,344]/ttttat [820,825]	none	none
3HSAR000037067_CR000238962 336	none	none	none	none
3HSAR000027372_CR000167500 2573	atagt [427,431]/gtagt [581,585]/atagt [851,855]/atagt [1150,1154]/gtagt [1204,1208]	ttttat [488,493]/ttttat [2296,2301]	none	tttgtct [1951,1957]
3HSAR000031768_CR000194212 2061	atagt [278,282]/gtagt [933,937]/atagt [1469,1473]/gtag [1815,1818]	ttttat [1576,1581]	tgtacata [273,280]	tttatct [436,442]/tttgtct [856,862]
3HSAR000041739_CR000585245 2384	gtagt [369,373]/gtagt [646,650]/atagt [652,656]/gtagt [763,767]/atagt [963,967]/gtagt [1312,1316]/atagt [2332,2336]	ttttat [110,115]/ttttat [737,742]/ttttat [831,836]/ttttat [1010,1015]/ttttat [1291,1296]/ttttat [2023,2028]/ttttat [2198,2203]/ttttat [2315,2320]	none	attatct [104,110]/attatct [436,442]
3HSAR000039175_CR000254060 324	none	ttttat [273,278]	none	none
3HSAR000039104_CR000253545 385	none	ttttaat [217,223]	none	none
3HSAR000060506_CR001379899 1531	gtagt [48,52]/atagt [177,181]/gtagt [585,589]	ttttat [1487,1492]	none	none
3HSAR000026253_CR000160660 82	none	none	none	none
3HSAR000011100_CR000067740 4076	atagt [507,511]/atagt [538,542]/atagt [1271,1275]/atagt [2159,2163]/atagt [2166,2170]/atagt [2341,2345]/gtagt [2487,2491]/atagt [2572,2576]/atagt [2591,2595]/gtagt [3215,3219]/atagt [4008,4012]	ttttat [179,184]/ttttat [498,503]/ttttat [626,631]/ttttat [1418,1423]/ttttat [2115,2120]/ttttat [2155,2160]/ttttat [2544,2549]/ttttat [3047,3052]/ttttat [3180,3185]/ttttat [3872,3877]	none	attgtct [168,174]
3HSAR000062304_CR001392200 4672	gtagt [854,858]/atagt [905,909]/atagt [1688,1692]/gtagt [2075,2079]/atagt [2244,2248]/gtagt [2499,2503]/gtagt [2543,2547]/atagt [3293,3297]/gtagt [3416,3420]/attagt [3757,3762]/attagt [4234,4239]	ttttat [950,955]/ttttat [1212,1217]/ttttat [1924,1929]/ttttat [2234,2239]/ttttat [3618,3623]/ttttat [3630,3635]/ttttaat [3865,3871]/ttttaat [4265,4271]/ttttaat [4580,4586]	none	tttgtct [833,839]/tttatct [1247,1253]/attgtct [3840,3846]
3HSAR000061392_CR001385690 3639	gtagt [304,308]/atagt [564,568]/atagt [1696,1700]/gtagt [2209,2213]/atagt [2222,2226]/gtagt [2416,2420]/gttagt [2719,2724]	ttttat [381,386]/ttttat [1082,1087]/ttttat [2168,2173]/ttttat [3303,3308]/ttttat [3629,3634]	tgtatata [1318,1325]	tttatct [2169,2175]/attgtct [3142,3148]
3HSAR000029776_CR000182072 121	none	none	none	none
3HSAR000049180_CR000726566 1034	gtagt [234,238]/gtagt [281,285]/gtagt [499,503]/gtagt [570,574]/gtagt [970,974]	ttttat [507,512]	none	tttgtct [27,33]
3HSAR000021054_CR000128943 150	gtag [46,49]	none	none	none
3HSAR000039208_CR000254307 2830	atagt [891,895]/atagt [1313,1317]/atagt [2033,2037]/atagt [2280,2284]/atagt [2566,2570]/gtag [2699,2702]/gtag [2761,2764]	ttttat [588,593]/ttttat [1777,1782]/ttttat [2481,2486]/ttttat [2587,2592]/ttttat [2642,2647]/ttttat [2704,2709]/ttttat [2733,2738]	none	attgtct [2513,2519]/attatct [2624,2630]
3HSAR000022083_CR000135225 598	none	ttttaat [571,577]	none	none
3HSAR000047453_CR000713331 5262	gtagt [258,262]/atagt [633,637]/gtagt [1771,1775]/atagt [2127,2131]/gtagt [2353,2357]/atagt [3110,3114]/atagt [3302,3306]/atagt [4047,4051]/gtagt [4988,4992]/atttagt [5207,5213]	ttttat [2217,2222]/ttttat [2401,2406]/ttttat [3497,3502]/ttttat [4531,4536]/ttttat [4719,4724]/ttttat [4756,4761]/ttttat [4767,4772]/ttttat [4804,4809]	none	tttatct [3944,3950]/attgtct [4451,4457]/attgtct [5157,5163]
3HSAR000056720_CR001228733 2095	gtag [2023,2026]	ttttat [1331,1336]/ttttat [2037,2042]	none	attatct [1206,1212]/tttatct [1332,1338]
3HSAR000004700_CR000029336 4817	atagt [32,36]/atagt [977,981]/gtagt [1343,1347]/gtagt [1604,1608]/atagt [2113,2117]/gtagt [2282,2286]/gtagt [2587,2591]/gtagt [2820,2824]/atagt [3064,3068]/atagt [3177,3181]/gtagt [3539,3543]/gtag [3577,3580]	ttttat [238,243]/ttttat [2682,2687]/ttttat [2833,2838]/ttttat [2856,2861]/ttttat [2980,2985]/ttttat [3435,3440]/ttttat [3548,3553]/ttttat [3556,3561]/ttttat [3606,3611]/ttttat [4515,4520]/ttttaat [4742,4748]/ttttaat [4750,4756]	none	attatct [50,56]/attgtct [2716,2722]/tttatct [3549,3555]/tttatct [3607,3613]
3HSAR000039485_CR000256426 2372	atagt [259,263]/atagt [428,432]/atagt [829,833]/gtagt [1138,1142]/atagt [1439,1443]/gtagt [1675,1679]/gtagt [2004,2008]/gtttagt [2180,2186]	ttttat [598,603]/ttttaat [1810,1816]/ttttaat [2198,2204]	none	attatct [1397,1403]
3HSAR000023701_CR000145051 3496	atagt [1008,1012]/atagt [1356,1360]/gtagt [1873,1877]/atagt [1883,1887]/atagt [1950,1954]/gtagt [2505,2509]/atagt [3050,3054]/attagt [3488,3493]	ttttat [1323,1328]/ttttat [1732,1737]/ttttat [1972,1977]/ttttat [2137,2142]/ttttat [2210,2215]/ttttat [2973,2978]	tgtaaata [337,344]	tttatct [1515,1521]/attgtct [1785,1791]/tttatct [2390,2396]/attgtct [2605,2611]/tttatct [2974,2980]/tttatct [3211,3217]
3HSAR000036396_CR000234066 348	none	none	none	none
3HSAR000030052_CR000183777 655	atagt [228,232]/gtag [475,478]	ttttat [209,214]/ttttat [234,239]	none	none
3HSAR000008300_CR000050950 325	none	none	none	none
3HSAR000050886_CR000739119 1222	gtagt [296,300]/atagt [574,578]/attagt [783,788]/atttagt [1092,1098]	ttttat [1195,1200]	none	attatct [205,211]
3HSAR000000112_CR000000697 669	none	ttttat [216,221]/ttttaaat [646,653]	none	none
3HSAR000065693_CR001630712 868	atagt [265,269]/atagt [442,446]/gtag [498,501]/gtag [792,795]	ttttat [753,758]	none	none
3HSAR000021948_CR000134425 932	gtag [851,854]	ttttaat [410,416]/ttttaat [552,558]	tgtacata [382,389]	none
3HSAR000014072_CR000085844 1208	atagt [204,208]/attagt [1087,1092]	ttttat [1007,1012]	none	none
3HSAR000014370_CR000087704 783	gtagt [639,643]	ttttaat [292,298]/ttttaat [300,306]	none	none
3HSAR000053656_CR000783098 49	none	none	none	none
3HSAR000025527_CR000156212 395	gtag [323,326]	ttttat [94,99]	none	none
3HSAR000027760_CR000169812 1452	gtagt [909,913]/gtagt [978,982]/gtagt [1044,1048]/gtag [1295,1298]	ttttat [369,374]/ttttat [1016,1021]	none	none
3HSAR000032868_CR000201172 1028	atagt [216,220]/gtagt [443,447]/gtagt [547,551]	ttttaat [597,603]	none	none
3HSAR000054145_CR000788403 938	atagt [23,27]/gtagt [443,447]/gtag [522,525]	ttttat [6,11]/ttttat [541,546]/ttttat [594,599]	tgtatata [654,661]	none
3HSAR000047579_CR000714240 1267	atagt [1112,1116]	ttttaagt [226,233]	none	none
3HSAR000016805_CR000102792 457	none	ttttat [314,319]/ttttat [333,338]	none	none
3HSAR000063132_CR001398092 3089	atagt [1956,1960]/atagt [2432,2436]/atttagt [2526,2532]/gtag [2925,2928]/gtag [2947,2950]/gtag [3039,3042]	ttttat [495,500]/ttttat [1433,1438]/ttttat [1462,1467]/ttttat [2353,2358]/ttttat [3049,3054]	none	none
3HSAR000051818_CR000745616 2675	atttagt [2031,2037]/gtag [2291,2294]	none	none	none
3HSAR000019165_CR000117341 69	none	none	none	none
3HSAR000021060_CR000128979 233	attagt [7,12]	none	none	none
3HSAR000055916_CR001222994 3145	atagt [218,222]/atagt [1386,1390]/atagt [2534,2538]/atagt [2897,2901]/atagt [3092,3096]	ttttat [37,42]/ttttat [66,71]/ttttat [944,949]/ttttat [2718,2723]/ttttat [2776,2781]/ttttat [2839,2844]	none	attatct [1732,1738]
3HSAR000055237_CR000797546 1554	atagt [122,126]/atagt [331,335]/gtagt [837,841]/atagt [1264,1268]/atagt [1273,1277]	ttttat [688,693]/ttttat [1025,1030]/ttttat [1428,1433]/ttttat [1545,1550]	none	attatct [417,423]/attgtct [628,634]
3HSAR000002328_CR000014574 3183	gtagt [1048,1052]/gtagt [2429,2433]/gtag [2706,2709]	ttttat [2477,2482]	none	tttgtct [728,734]/tttatct [2774,2780]
3HSAR000007572_CR000046879 2697	none	ttttcat [168,174]	none	none
3HSAR000019319_CR000118263 5199	atagt [447,451]/gtagt [518,522]/atagt [1891,1895]/atagt [3017,3021]/gtagt [3062,3066]/atagt [3981,3985]/atagt [4984,4988]/attagt [5080,5085]	ttttat [1115,1120]/ttttat [1412,1417]/ttttat [2318,2323]/ttttat [4698,4703]/ttttat [4807,4812]/ttttaaat [4813,4820]/ttttaaat [4953,4960]	tgtagata [2269,2276]	attatct [3262,3268]/tttatct [4437,4443]
3HSAR000057291_CR001253189 799	attagt [770,775]	ttttat [441,446]	none	none
3HSAR000032749_CR000200421 501	gtagt [194,198]/gtag [279,282]	ttttat [400,405]/ttttat [429,434]	none	none
3HSAR000020146_CR000123282 2110	gtagt [846,850]/atagt [1801,1805]/gtag [1922,1925]	ttttat [1859,1864]/ttttaat [2088,2094]	none	none
3HSAR000026083_CR000159626 135	none	ttttact [46,52]	none	none
3HSAR000026080_CR000159607 135	none	ttttact [46,52]	none	none
3HSAR000033105_CR000204367 928	gtag [366,369]/gtag [750,753]	none	none	none
3HSAR000031452_CR000192277 632	none	none	none	none
3HSAR000060074_CR001377074 1298	atagt [1103,1107]/gtag [1165,1168]/gtag [1285,1288]	ttttat [827,832]/ttttcat [926,932]	none	tttgtct [1180,1186]
3HSAR000033089_CR000204248 945	gtag [139,142]/gtag [154,157]/gtag [405,408]/gtag [442,445]/gtag [465,468]	ttttat [832,837]	none	none
3HSAR000059651_CR001374680 1593	atagt [150,154]/atagt [191,195]/atagt [202,206]/atagt [851,855]/atagt [1586,1590]	ttttat [247,252]/ttttat [451,456]/ttttat [544,549]/ttttat [586,591]/ttttat [643,648]/ttttat [826,831]/ttttat [857,862]/ttttat [864,869]/ttttat [966,971]/ttttcat [1549,1555]	none	tttatct [452,458]
3HSAR000021078_CR000129089 291	none	none	none	none
3HSAR000040636_CR000372609 750	gtagt [696,700]	none	none	none
3HSAR000022845_CR000139850 839	atagt [151,155]	ttttat [758,763]	none	none
3HSAR000014261_CR000087015 989	gtagt [672,676]/atagt [697,701]	ttttat [337,342]/ttttat [360,365]/ttttat [570,575]/ttttat [744,749]/ttttat [827,832]	none	tttgtct [207,213]
3HSAR000019645_CR000120213 2889	gtagt [49,53]/atagt [412,416]/gtagt [612,616]/atagt [671,675]/atagt [1633,1637]/atagt [1982,1986]/atagt [2180,2184]/gtagt [2767,2771]	ttttat [1264,1269]/ttttat [1337,1342]/ttttat [1744,1749]/ttttaat [2503,2509]/ttttaaat [2749,2756]	tgtatata [131,138]	none
3HSAR000005404_CR000033640 911	gtagt [748,752]/gtagt [780,784]/atagt [796,800]	ttttaat [197,203]	none	tttatct [810,816]
3HSAR000012256_CR000074662 4373	gtagt [200,204]/gtagt [556,560]/atagt [761,765]/atagt [926,930]/gtagt [1222,1226]/atagt [1578,1582]/atagt [3295,3299]/gtag [3394,3397]/gtag [3421,3424]	ttttat [2428,2433]/ttttat [3315,3320]/ttttat [3447,3452]	tgtagata [477,484]/tgtatata [727,734]/tgtaaata [1076,1083]/tgtaaata [3855,3862]	none
3HSAR000025509_CR000156101 2705	atagt [934,938]/gtag [970,973]/gtag [1046,1049]/gtag [1058,1061]/gtag [1351,1354]/gtag [1655,1658]/gtag [1917,1920]/gtag [2227,2230]	ttttat [294,299]/ttttat [765,770]/ttttat [1895,1900]	none	tttatct [1896,1902]
3HSAR000011873_CR000072364 249	none	none	tgtacata [145,152]	none
3HSAR000041230_CR000532985 194	none	none	none	none
3HSAR000059893_CR001376060 890	gtag [260,263]/gtag [785,788]	ttttat [545,550]	none	none
3HSAR000054134_CR000788295 634	atagt [161,165]/gtagt [445,449]/gtagt [460,464]	none	none	none
3HSAR000007545_CR000046708 1680	gtagt [176,180]/attagt [1603,1608]	ttttat [674,679]	tgtaaata [920,927]	none
3HSAR000043942_CR000603015 685	gtagt [112,116]/atagt [202,206]/atagt [328,332]	ttttat [541,546]/ttttact [562,568]	none	tttatct [542,548]
3HSAR000036259_CR000233053 38	none	none	none	none
3HSAR000032330_CR000197673 158	atagt [113,117]	none	none	none
3HSAR000057801_CR001256948 2999	atagt [210,214]/gtagt [433,437]/atagt [1123,1127]/atagt [1182,1186]/gtagt [1677,1681]/atagt [2881,2885]/gttagt [2956,2961]	ttttat [1168,1173]/ttttat [2993,2998]	none	attatct [2483,2489]
3HSAR000017606_CR000107752 59	none	none	none	none
3HSAR000056350_CR001226263 119	none	none	none	none
3HSAR000002744_CR000017263 574	none	ttttat [192,197]/ttttaat [215,221]	none	none
3HSAR000051715_CR000744892 450	gtagt [106,110]	ttttat [302,307]	none	none
3HSAR000023241_CR000142256 1413	atagt [1083,1087]/gtag [1381,1384]	ttttat [1241,1246]/ttttat [1251,1256]/ttttat [1397,1402]	tgtatata [1078,1085]	tttgtct [647,653]
3HSAR000035403_CR000225513 285	gtag [214,217]	none	none	none
3HSAR000064792_CR001410058 854	none	none	none	none
3HSAR000020192_CR000123570 947	gtagt [477,481]	ttttaat [774,780]	none	none
3HSAR000010654_CR000065093 87	none	none	none	none
3HSAR000064363_CR001406864 481	gtagt [160,164]/gtag [244,247]	none	none	none
3HSAR000012571_CR000076574 5370	atagt [109,113]/atagt [848,852]/atagt [1583,1587]/atagt [1647,1651]/gtagt [3355,3359]/gtagt [3510,3514]/gtagt [3695,3699]/gtagt [4843,4847]/atagt [4949,4953]/gtagt [5254,5258]	ttttat [1333,1338]/ttttat [1783,1788]/ttttat [2607,2612]/ttttat [3088,3093]/ttttat [5123,5128]/ttttaaat [5261,5268]/ttttaagt [5276,5283]/ttttact [5300,5306]	tgtatata [2417,2424]/tgtatata [4528,4535]	tttgtct [720,726]/tttgtct [1106,1112]/attatct [3235,3241]/tttatct [5089,5095]
3HSAR000059500_CR001373608 191	none	none	none	none
3HSAR000036929_CR000237965 1170	atagt [294,298]/gtag [975,978]	ttttat [965,970]	none	tttgtct [383,389]
3HSAR000050739_CR000738112 638	gtagt [391,395]/atagt [538,542]	ttttat [39,44]/ttttat [80,85]/ttttat [122,127]	none	none
3HSAR000025392_CR000155381 112	none	none	none	none
3HSAR000056092_CR001224391 414	atagt [43,47]/attagt [299,304]	ttttaaat [355,362]	none	none
3HSAR000008817_CR000054088 781	atagt [175,179]/atagt [430,434]	ttttat [292,297]/ttttat [460,465]/ttttat [615,620]	none	tttgtct [20,26]
3HSAR000052168_CR000748386 1548	gtagt [160,164]/gtagt [744,748]/gtagt [856,860]/atagt [1414,1418]	ttttat [194,199]/ttttat [230,235]/ttttat [1224,1229]/ttttat [1430,1435]/ttttaagt [1489,1496]	tgtacata [497,504]	none
3HSAR000044463_CR000606990 315	gtagt [182,186]	none	none	none
3HSAR000017953_CR000109902 100	none	none	none	none
3HSAR000005234_CR000032606 5622	gtagt [109,113]/atagt [815,819]/atagt [2022,2026]/atagt [2044,2048]/gtagt [2836,2840]/atagt [3115,3119]/atagt [3215,3219]/gtag [3964,3967]/gtag [4069,4072]/gtag [4307,4310]/gtag [5117,5120]/gtag [5142,5145]/gtag [5153,5156]/gtag [5212,5215]	ttttat [835,840]/ttttat [1348,1353]/ttttat [2040,2045]/ttttat [2131,2136]/ttttat [3211,3216]/ttttat [3444,3449]/ttttat [4636,4641]/ttttact [4939,4945]/ttttcat [5550,5556]/ttttcat [5564,5570]	tgtatata [174,181]/tgtatata [206,213]	attatct [4039,4045]
3HSAR000040634_CR000372596 615	gtag [183,186]	none	none	none
3HSAR000034676_CR000216900 926	gtag [169,172]	ttttat [296,301]	none	none
3HSAR000045479_CR000627246 4424	gtagt [1548,1552]/atagt [2686,2690]/atagt [2800,2804]/gtag [2867,2870]/gtag [3008,3011]/gtag [3060,3063]/gtag [3667,3670]/gtag [4264,4267]	ttttat [1869,1874]/ttttat [4100,4105]/ttttat [4139,4144]/ttttat [4385,4390]/ttttat [4396,4401]	tgtaaata [866,873]/tgtatata [1898,1905]/tgtatata [2838,2845]/tgtaaata [2998,3005]/tgtaaata [4356,4363]	tttatct [1870,1876]/attgtct [2813,2819]/tttatct [3430,3436]
3HSAR000036181_CR000232492 1964	atagt [420,424]/atagt [575,579]/atagt [1072,1076]/gtagt [1433,1437]/gtag [1557,1560]	ttttat [198,203]/ttttat [434,439]/ttttat [946,951]/ttttat [954,959]/ttttat [1278,1283]/ttttcat [1543,1549]	tgtaaata [1371,1378]	attatct [596,602]
3HSAR000030924_CR000189129 644	gtag [191,194]/gtag [555,558]	none	none	none
3HSAR000007634_CR000047244 1471	atagt [266,270]/atagt [393,397]/atagt [515,519]/atagt [854,858]/gtagt [1362,1366]	ttttat [270,275]/ttttat [560,565]/ttttaat [650,656]/ttttaat [1155,1161]	none	tttatct [561,567]
3HSAR000018160_CR000111152 1162	attagt [463,468]/attagt [1082,1087]	ttttaat [999,1005]	none	none
3HSAR000044599_CR000608124 691	none	none	none	none
3HSAR000044333_CR000605996 296	atttagt [150,156]	ttttact [54,60]	none	none
3HSAR000018209_CR000111454 641	gtag [82,85]	none	none	none
3HSAR000018539_CR000113488 2202	atagt [2126,2130]	ttttat [2063,2068]/ttttat [2174,2179]	none	attatct [2067,2073]
3HSAR000056952_CR001250962 60	none	none	none	none
3HSAR000030000_CR000183459 563	atttagt [548,554]	none	none	none
3HSAR000032418_CR000198310 273	gtag [255,258]	none	none	none
3HSAR000024823_CR000151889 497	gtag [466,469]	none	none	none
3HSAR000039630_CR000257559 697	none	none	none	none
3HSAR000007723_CR000047778 2859	gtagt [1434,1438]/gtagt [2591,2595]/atagt [2617,2621]/atagt [2821,2825]	ttttat [1889,1894]/ttttat [1994,1999]/ttttat [2817,2822]	none	none
3HSAR000032855_CR000201090 393	atagt [111,115]/gtagt [252,256]	none	none	none
3HSAR000038590_CR000249692 7016	atagt [190,194]/gtagt [298,302]/gtagt [1426,1430]/atagt [1884,1888]/atagt [2062,2066]/atagt [2292,2296]/gtagt [3615,3619]/gtagt [4060,4064]/gtagt [4898,4902]/gtagt [5101,5105]/gtagt [6275,6279]/atagt [6617,6621]/atagt [6743,6747]	ttttat [657,662]/ttttat [1733,1738]/ttttat [1949,1954]/ttttat [1955,1960]/ttttat [3815,3820]/ttttat [4677,4682]/ttttat [5447,5452]/ttttat [5897,5902]/ttttat [5918,5923]/ttttaat [6340,6346]	none	tttatct [1956,1962]/attgtct [4763,4769]/attgtct [5399,5405]/tttatct [6488,6494]
3HSAR000002233_CR000013978 681	gtag [21,24]	none	none	none
3HSAR000021805_CR000133565 46	none	none	none	none
3HSAR000007081_CR000043955 680	atagt [240,244]/gtagt [550,554]	ttttat [303,308]/ttttaat [489,495]	tgtatata [611,618]	tttgtct [385,391]
3HSAR000048986_CR000725110 415	none	none	none	none
3HSAR000062379_CR001392741 1455	gtagt [525,529]/gtagt [745,749]/atagt [909,913]/atagt [1043,1047]	ttttat [274,279]/ttttat [1127,1132]/ttttat [1343,1348]/ttttat [1366,1371]/ttttat [1421,1426]	tgtaaata [331,338]	none
3HSAR000052902_CR000753644 314	none	none	none	none
3HSAR000044394_CR000606466 476	atagt [314,318]/gtag [327,330]	none	none	none
3HSAR000020581_CR000125990 1644	atagt [1568,1572]	ttttat [163,168]	tgtatata [1045,1052]	tttgtct [1280,1286]
3HSAR000035000_CR000219289 61	none	none	none	none
3HSAR000052792_CR000752855 2052	gtagt [42,46]/atagt [633,637]/atagt [1406,1410]/atagt [1590,1594]/gtag [1653,1656]	ttttact [1829,1835]	tgtaaata [371,378]/tgtacata [900,907]	none
3HSAR000011467_CR000069910 300	none	ttttat [243,248]	none	none
3HSAR000032624_CR000199640 1396	atagt [3,7]/gttagt [185,190]/attagt [904,909]	ttttaat [613,619]	none	attatct [449,455]/attgtct [1191,1197]
3HSAR000065546_CR001629870 1299	atagt [603,607]/gtag [996,999]	none	none	none
3HSAR000034000_CR000211208 4918	gtagt [473,477]/atagt [1273,1277]/gtagt [1518,1522]/atagt [1629,1633]/atagt [2747,2751]/gtagt [3264,3268]/atagt [3304,3308]/atagt [3581,3585]/attagt [4229,4234]/gtag [4458,4461]/gtag [4605,4608]/gtag [4637,4640]	ttttat [1220,1225]/ttttaaat [2950,2957]	tgtacata [1523,1530]/tgtatata [1931,1938]/tgtaaata [3738,3745]	tttgtct [1298,1304]/attgtct [1596,1602]/tttatct [2153,2159]
3HSAR000056766_CR001249520 164	gtag [15,18]	none	none	none
3HSAR000064544_CR001408192 2098	gtagt [585,589]/atagt [1101,1105]/gtagt [1229,1233]/atagt [1587,1591]/gtagt [1647,1651]/atagt [1811,1815]	ttttat [2016,2021]	none	none
3HSAR000006152_CR000038253 1921	gtagt [57,61]/atagt [917,921]/atagt [1627,1631]	ttttat [774,779]/ttttat [974,979]	none	attatct [126,132]
3HSAR000028193_CR000172448 8128	atagt [951,955]/gtagt [1318,1322]/atagt [3030,3034]/atagt [3351,3355]/atagt [3500,3504]/gtagt [4718,4722]/atagt [5053,5057]/gtagt [5378,5382]/atagt [6179,6183]/gtag [6232,6235]/gtag [6428,6431]/gtag [6561,6564]/gtag [6718,6721]/gtag [7643,7646]/gtag [8005,8008]	ttttat [762,767]/ttttat [835,840]/ttttat [1902,1907]/ttttat [2926,2931]/ttttat [3511,3516]/ttttat [3592,3597]/ttttat [3908,3913]/ttttat [4733,4738]/ttttat [6547,6552]/ttttat [6628,6633]/ttttaagt [7739,7746]/ttttaagt [7853,7860]	tgtacata [4466,4473]/tgtaaata [8103,8110]	attatct [1840,1846]/attatct [3278,3284]/tttgtct [5330,5336]/tttatct [6339,6345]/tttatct [7046,7052]
3HSAR000020664_CR000126493 153	none	none	none	none
3HSAR000024895_CR000152335 467	none	none	none	none
3HSAR000065141_CR001412653 529	gtagt [407,411]	none	none	none
3HSAR000062837_CR001396030 286	gtag [11,14]/gtag [229,232]	none	none	none
3HSAR000040835_CR000374063 483	gtagt [252,256]	ttttat [81,86]/ttttaaat [118,125]	none	attatct [227,233]
3HSAR000023633_CR000144631 1497	atagt [725,729]/atagt [990,994]/gtag [1138,1141]/gtag [1154,1157]	ttttat [526,531]	none	none
3HSAR000033058_CR000204028 701	none	ttttat [370,375]	none	none
3HSAR000057290_CR001253182 1562	gtttagt [1196,1202]/atttagt [1430,1436]	none	tgtatata [1343,1350]	tttgtct [1064,1070]/tttgtct [1102,1108]
3HSAR000029369_CR000179572 1010	gtag [238,241]/gtag [575,578]/gtag [630,633]	ttttat [820,825]/ttttat [826,831]	none	none
3HSAR000018642_CR000114127 1574	gtagt [1486,1490]	ttttat [1157,1162]/ttttaaat [1170,1177]	none	attgtct [1521,1527]
3HSAR000029764_CR000181993 281	atagt [277,281]	ttttat [196,201]/ttttaat [259,265]	none	none
3HSAR000033996_CR000211183 2172	atagt [310,314]/gtag [799,802]/gtag [1194,1197]	ttttaat [1493,1499]	tgtacata [305,312]	none
3HSAR000037893_CR000244784 2816	gtagt [1175,1179]/gtagt [1314,1318]/gtttagt [2263,2269]/gtag [2420,2423]	ttttat [1561,1566]/ttttat [1591,1596]/ttttat [1826,1831]/ttttcat [2790,2796]	tgtatata [976,983]	tttgtct [2198,2204]
3HSAR000055320_CR000798225 944	attagt [746,751]	ttttaat [491,497]/ttttaat [548,554]/ttttaat [587,593]/ttttact [900,906]	tgtaaata [430,437]	none
3HSAR000050948_CR000739516 1488	gtagt [446,450]/atagt [1152,1156]	ttttat [111,116]/ttttat [319,324]/ttttat [716,721]/ttttat [1238,1243]	tgtatata [924,931]	tttatct [112,118]
3HSAR000008491_CR000052114 143	gtagt [98,102]	none	none	none
3HSAR000019970_CR000122188 166	none	none	none	none
3HSAR000020329_CR000124428 269	gtag [130,133]/gtag [152,155]	ttttat [73,78]	none	none
3HSAR000045340_CR000626225 2655	gtagt [1759,1763]/gtag [1981,1984]/gtag [2433,2436]	ttttat [240,245]	none	attgtct [2550,2556]
3HSAR000025844_CR000158162 484	gtagt [173,177]/gtagt [233,237]	ttttaaat [57,64]	none	none
3HSAR000004495_CR000028123 1236	atagt [590,594]	ttttat [778,783]/ttttat [795,800]/ttttat [1123,1128]	none	attgtct [731,737]/tttatct [779,785]/tttatct [1129,1135]
3HSAR000010743_CR000065621 1572	gtagt [413,417]/atagt [1175,1179]/gtagt [1265,1269]	ttttat [1206,1211]/ttttat [1303,1308]/ttttact [1562,1568]	none	attgtct [500,506]
3HSAR000055512_CR000799723 1453	gtag [169,172]/gtag [272,275]/gtag [276,279]/gtag [469,472]/gtag [477,480]/gtag [806,809]/gtag [1214,1217]	ttttat [1099,1104]/ttttat [1252,1257]/ttttat [1285,1290]/ttttcat [1299,1305]	none	tttgtct [1446,1452]
3HSAR000037841_CR000244432 178	gtag [161,164]	ttttaat [63,69]	none	none
3HSAR000048173_CR000718829 693	gtag [50,53]	none	tgtagata [49,56]	none
3HSAR000014442_CR000088154 1519	atagt [196,200]/gtagt [560,564]/gtagt [949,953]/gtag [1394,1397]/gtag [1486,1489]	ttttat [442,447]/ttttat [974,979]	tgtaaata [894,901]/tgtaaata [1071,1078]	attgtct [296,302]
3HSAR000035939_CR000230770 5799	atagt [465,469]/atagt [796,800]/gtagt [979,983]/gtagt [2635,2639]/gtagt [2923,2927]/gtagt [3692,3696]/atagt [3703,3707]/atagt [3857,3861]/gtagt [4011,4015]/atagt [4235,4239]/atagt [4802,4806]/atagt [5710,5714]	ttttat [815,820]/ttttat [1815,1820]/ttttat [3330,3335]/ttttat [3555,3560]/ttttaagt [5239,5246]/ttttact [5555,5561]	none	tttgtct [227,233]/tttatct [2206,2212]/tttgtct [3878,3884]/tttgtct [5321,5327]
3HSAR000048929_CR000724688 197	atagt [25,29]/atagt [157,161]	ttttat [146,151]/ttttat [161,166]	none	none
3HSAR000060657_CR001380789 2416	gtagt [245,249]/gtagt [340,344]/atagt [955,959]/atagt [1395,1399]/atagt [1828,1832]/atagt [2027,2031]/attagt [2163,2168]/gtag [2383,2386]	ttttat [161,166]/ttttat [388,393]/ttttat [780,785]/ttttat [1044,1049]/ttttat [1060,1065]/ttttat [1071,1076]/ttttat [1098,1103]/ttttat [1391,1396]/ttttaagt [1625,1632]	none	tttatct [959,965]/attatct [1678,1684]
3HSAR000014238_CR000086883 847	gtagt [528,532]/atagt [789,793]/atagt [829,833]	none	none	none
3HSAR000009766_CR000059765 1907	gtagt [191,195]/atagt [1288,1292]	ttttaat [916,922]	tgtagata [962,969]	tttgtct [1862,1868]
3HSAR000037814_CR000244229 462	gtag [327,330]	none	none	none
3HSAR000005919_CR000036813 259	none	none	none	none
3HSAR000053690_CR000783766 329	gtag [46,49]	ttttcat [258,264]	none	none
3HSAR000044186_CR000604863 3482	atagt [1295,1299]/gtag [1486,1489]	ttttat [3476,3481]	tgtaaata [1254,1261]	none
3HSAR000065946_CR001633030 2405	atagt [548,552]/atagt [631,635]/gtagt [658,662]/atagt [676,680]/gtagt [1192,1196]/gtagt [1687,1691]/gtagt [2125,2129]	ttttat [398,403]/ttttat [1631,1636]/ttttat [1771,1776]/ttttat [2179,2184]/ttttat [2238,2243]	none	none
3HSAR000023790_CR000145592 2008	gtagt [832,836]/atagt [854,858]/gtagt [1156,1160]/atagt [1209,1213]/gtagt [1368,1372]/attagt [1618,1623]/gtag [1802,1805]	ttttat [219,224]/ttttaat [427,433]/ttttaagt [491,498]	tgtatata [196,203]/tgtatata [1339,1346]/tgtaaata [1456,1463]/tgtacata [1957,1964]	tttgtct [579,585]
3HSAR000005327_CR000033181 1542	atagt [586,590]/gtagt [938,942]/gtag [1310,1313]/gtag [1504,1507]	ttttat [270,275]/ttttat [606,611]/ttttaaat [1495,1502]	none	none
3HSAR000020574_CR000125944 252	none	ttttat [221,226]	none	none
3HSAR000032979_CR000203410 217	none	none	none	none
3HSAR000022548_CR000138046 64	none	none	none	none
3HSAR000025464_CR000155838 1603	atagt [934,938]/gtag [1293,1296]	ttttat [775,780]	tgtacata [905,912]	none
3HSAR000036225_CR000232806 255	none	none	none	none
3HSAR000031171_CR000190584 1390	atagt [260,264]/gttagt [1260,1265]	ttttat [1102,1107]/ttttat [1320,1325]	none	attatct [419,425]/tttgtct [619,625]
3HSAR000059837_CR001375755 631	gtag [239,242]	ttttat [592,597]	tgtaaata [359,366]	none
3HSAR000034275_CR000213376 218	none	none	none	none
3HSAR000012189_CR000074267 375	none	ttttat [118,123]/ttttat [365,370]	none	attgtct [221,227]
3HSAR000052535_CR000751010 2442	gtagt [486,490]/atagt [534,538]/gtagt [2174,2178]/attagt [2411,2416]	ttttat [671,676]/ttttat [1804,1809]/ttttat [2123,2128]/ttttat [2333,2338]	tgtacata [2056,2063]	tttgtct [1888,1894]
3HSAR000042825_CR000594643 2374	gtagt [531,535]/gtagt [1253,1257]/atagt [1402,1406]/gtagt [2075,2079]	none	tgtacata [2110,2117]	none
3HSAR000045772_CR000629380 1533	atagt [509,513]/atagt [544,548]/gtagt [834,838]/atagt [839,843]/gtagt [1394,1398]	ttttaat [265,271]/ttttaat [1295,1301]	none	tttgtct [660,666]
3HSAR000034690_CR000217006 241	gtag [75,78]	none	none	none
3HSAR000040279_CR000267257 3345	atagt [1878,1882]/gtag [1943,1946]/gtag [2689,2692]/gtag [3054,3057]	ttttat [450,455]/ttttat [693,698]/ttttat [755,760]/ttttat [2316,2321]/ttttat [3219,3224]	tgtacata [2289,2296]	tttatct [451,457]/attgtct [3328,3334]
3HSAR000001609_CR000010002 241	none	none	none	none
3HSAR000053571_CR000782279 1116	atagt [71,75]/gtag [308,311]	none	none	none
3HSAR000024986_CR000152888 670	gtagt [357,361]/gtag [533,536]	none	none	none
3HSAR000027856_CR000170396 302	none	ttttat [277,282]	none	none
3HSAR000051131_CR000740755 2514	gtagt [1277,1281]/atagt [1562,1566]/atagt [2138,2142]/gtag [2291,2294]/gtag [2456,2459]	ttttat [59,64]/ttttat [107,112]	none	tttgtct [2505,2511]
3HSAR000031706_CR000193839 1832	atagt [901,905]/attagt [1041,1046]/attagt [1688,1693]	ttttat [432,437]/ttttat [475,480]/ttttat [503,508]/ttttat [601,606]/ttttat [1316,1321]/ttttat [1736,1741]	none	none
3HSAR000034399_CR000214318 4533	gtagt [1658,1662]/gtagt [1944,1948]/atagt [2184,2188]/atagt [3335,3339]/gtagt [3618,3622]/gtagt [3749,3753]/gtagt [4462,4466]	ttttat [722,727]/ttttat [1767,1772]/ttttat [2010,2015]/ttttat [2298,2303]/ttttat [3234,3239]	tgtacata [3005,3012]/tgtacata [3877,3884]	tttatct [1775,1781]/tttatct [2269,2275]/tttgtct [3037,3043]
3HSAR000016364_CR000100049 9030	gtagt [935,939]/gtagt [988,992]/atagt [1022,1026]/gtagt [2569,2573]/atagt [2790,2794]/atagt [2970,2974]/atagt [3861,3865]/gtagt [4745,4749]/atagt [6349,6353]/atagt [6836,6840]/atagt [7137,7141]/atagt [7503,7507]/atagt [7642,7646]/atagt [8139,8143]/attagt [8408,8413]/gtag [8450,8453]/gtag [8624,8627]/gtag [8738,8741]/gtag [8850,8853]	ttttat [796,801]/ttttat [1145,1150]/ttttat [3074,3079]/ttttat [3209,3214]/ttttat [3827,3832]/ttttat [5423,5428]/ttttat [7537,7542]/ttttat [7697,7702]/ttttat [8277,8282]/ttttat [8762,8767]/ttttat [8945,8950]	tgtacata [6618,6625]/tgtatata [9001,9008]	tttgtct [2137,2143]/attatct [3125,3131]/tttatct [3210,3216]/tttatct [4849,4855]/tttgtct [6030,6036]/attgtct [8770,8776]
3HSAR000034888_CR000218485 431	gtagt [269,273]/atagt [306,310]	ttttact [93,99]	none	attgtct [342,348]
3HSAR000014353_CR000087601 3121	gtagt [392,396]/atagt [841,845]/attagt [2300,2305]/gtag [2435,2438]	ttttat [2649,2654]/ttttat [2742,2747]/ttttat [2817,2822]/ttttat [2845,2850]/ttttaat [3085,3091]/ttttaaat [3094,3101]	tgtagata [2434,2441]	attatct [653,659]/attatct [827,833]/tttgtct [2468,2474]
3HSAR000013331_CR000081195 63	none	none	none	none
3HSAR000059474_CR001373445 522	gtagt [472,476]	ttttat [353,358]	none	tttatct [354,360]
3HSAR000057753_CR001256585 286	atagt [23,27]/gtag [143,146]	ttttcat [90,96]	tgtacata [165,172]/tgtaaata [215,222]	none
3HSAR000010478_CR000064048 295	gtagt [91,95]/attagt [202,207]	ttttaat [224,230]	none	none
3HSAR000043088_CR000596637 267	gtagt [44,48]/gtag [181,184]	none	none	tttgtct [204,210]
3HSAR000007570_CR000046869 2403	atagt [10,14]/gtagt [962,966]/atagt [2106,2110]/gtag [2114,2117]	ttttat [1621,1626]/ttttat [1710,1715]/ttttat [1750,1755]/ttttcat [1760,1766]/ttttcat [2101,2107]	none	attatct [129,135]
3HSAR000022974_CR000140625 375	gtagt [323,327]	none	none	none
3HSAR000039253_CR000254650 3234	atagt [81,85]/gtagt [617,621]/atagt [1295,1299]/gtagt [1997,2001]/gtagt [2065,2069]/gtagt [3037,3041]/gtagt [3144,3148]/gtagt [3159,3163]	ttttat [1605,1610]/ttttat [2631,2636]	none	none
3HSAR000010718_CR000065475 4578	atagt [821,825]/atagt [1671,1675]/atagt [1682,1686]/gtagt [2770,2774]/gtagt [3250,3254]/atagt [4390,4394]	ttttat [29,34]/ttttat [1596,1601]/ttttat [4182,4187]	tgtacata [392,399]	attatct [4009,4015]
3HSAR000025927_CR000158669 1533	atagt [527,531]/attagt [705,710]	ttttat [607,612]/ttttat [615,620]/ttttat [660,665]/ttttaat [700,706]	tgtacata [1453,1460]	none
3HSAR000015592_CR000095258 144	gtag [25,28]	none	none	none
3HSAR000000064_CR000000419 4139	gtagt [136,140]/gtagt [677,681]/atagt [1359,1363]/atagt [1394,1398]/atagt [1413,1417]/atagt [1608,1612]/gtagt [1930,1934]/atagt [2005,2009]/atagt [2105,2109]/atagt [2190,2194]/atagt [2303,2307]/atagt [2328,2332]/atagt [2939,2943]/atagt [3660,3664]/atagt [3668,3672]/atagt [3707,3711]/attagt [4051,4056]/attagt [4059,4064]/gtag [4069,4072]	ttttat [360,365]/ttttat [432,437]/ttttat [462,467]/ttttat [749,754]/ttttat [2368,2373]/ttttat [2560,2565]/ttttat [3053,3058]/ttttat [3227,3232]/ttttat [4020,4025]	tgtaaata [404,411]	tttatct [463,469]/tttgtct [1668,1674]/attgtct [3773,3779]
3HSAR000062813_CR001395863 1594	gtagt [384,388]/atagt [447,451]/atagt [464,468]/gtagt [627,631]/atagt [829,833]/atagt [1216,1220]/gtag [1292,1295]	ttttat [1161,1166]/ttttat [1538,1543]	none	attgtct [268,274]/tttatct [1410,1416]/tttatct [1509,1515]
3HSAR000057886_CR001257621 1294	atagt [836,840]/gtagt [892,896]/atagt [1036,1040]	ttttat [1179,1184]/ttttaaat [1234,1241]	tgtaaata [63,70]	attatct [17,23]/tttatct [1180,1186]
3HSAR000031060_CR000189938 552	gtagt [118,122]/gtag [337,340]	none	none	none
3HSAR000023611_CR000144499 1171	atagt [182,186]/atagt [316,320]/atagt [632,636]/atagt [1048,1052]	ttttact [957,963]	tgtatata [211,218]	attgtct [770,776]/tttgtct [921,927]
3HSAR000012064_CR000073507 132	none	none	none	none
3HSAR000046594_CR000635855 29	none	none	none	none
3HSAR000008264_CR000050739 30	none	none	none	none
3HSAR000042714_CR000593813 1450	gtag [1107,1110]/gtag [1125,1128]/gtag [1132,1135]/gtag [1374,1377]/gtag [1392,1395]	none	none	tttgtct [743,749]/tttgtct [1337,1343]
3HSAR000015109_CR000092223 148	none	none	none	none
3HSAR000043480_CR000599648 57	none	none	none	none
3HSAR000060927_CR001382401 2052	gtagt [386,390]/atagt [654,658]/gtag [738,741]/gtag [945,948]/gtag [1189,1192]/gtag [1327,1330]/gtag [1454,1457]	ttttact [1655,1661]	none	attgtct [816,822]
3HSAR000048711_CR000723007 1407	gtag [290,293]/gtag [893,896]/gtag [1075,1078]/gtag [1319,1322]	none	tgtatata [1357,1364]	none
3HSAR000015061_CR000091932 2765	atagt [1655,1659]/gtagt [1926,1930]/atagt [2177,2181]/atagt [2291,2295]/atagt [2549,2553]/gtag [2618,2621]/gtag [2648,2651]	ttttat [75,80]/ttttat [1032,1037]/ttttat [2204,2209]/ttttact [2366,2372]	tgtagata [2647,2654]	attatct [2609,2615]/attatct [2635,2641]
3HSAR000023953_CR000146580 181	none	ttttat [153,158]	none	none
3HSAR000031048_CR000189865 972	gtag [517,520]	none	none	none
3HSAR000036901_CR000237771 989	gtag [371,374]/gtag [680,683]	ttttat [57,62]	none	tttatct [58,64]/attgtct [151,157]
3HSAR000013611_CR000082954 1495	gtagt [387,391]/atagt [884,888]/gtag [962,965]/gtag [980,983]/gtag [1054,1057]	ttttat [531,536]/ttttat [542,547]	none	tttatct [532,538]/attgtct [1199,1205]
3HSAR000064481_CR001407711 1572	gtagt [1115,1119]	ttttaat [538,544]/ttttcat [748,754]	none	none
3HSAR000065804_CR001631322 1429	atagt [32,36]/gtagt [532,536]	none	none	none
3HSAR000065321_CR001627634 2600	atagt [872,876]/gtagt [955,959]/gtagt [1280,1284]/gtag [1708,1711]/gtag [1851,1854]/gtag [1893,1896]/gtag [2057,2060]/gtag [2409,2412]	ttttat [536,541]/ttttat [584,589]/ttttat [812,817]/ttttat [1251,1256]/ttttat [1621,1626]/ttttat [1730,1735]/ttttat [2416,2421]/ttttaaat [2497,2504]	tgtacata [786,793]/tgtacata [795,802]/tgtaaata [1015,1022]	tttatct [537,543]
3HSAR000042013_CR000587855 1666	gtagt [665,669]/atagt [851,855]	ttttat [1470,1475]/ttttat [1557,1562]/ttttaat [1633,1639]	none	none
3HSAR000065031_CR001411838 1660	gtagt [24,28]/gtagt [342,346]/gtagt [1500,1504]	ttttat [1604,1609]/ttttaat [1632,1638]	none	none
3HSAR000024696_CR000151113 2613	gtagt [118,122]/gtagt [559,563]/atagt [1528,1532]/atagt [1698,1702]/atagt [2107,2111]/atagt [2131,2135]/gtagt [2264,2268]/gttagt [2394,2399]	ttttat [851,856]/ttttat [1184,1189]/ttttat [1718,1723]/ttttat [2450,2455]/ttttat [2471,2476]/ttttaaat [2561,2568]/ttttcat [2585,2591]	none	none
3HSAR000006712_CR000041678 4743	atagt [333,337]/atagt [567,571]/gtagt [768,772]/gtagt [1866,1870]/gtagt [2014,2018]/gtagt [3012,3016]/atagt [3101,3105]/atagt [4576,4580]/gtag [4731,4734]	ttttat [177,182]/ttttat [811,816]/ttttat [2367,2372]/ttttat [2836,2841]/ttttat [4046,4051]/ttttat [4200,4205]	none	attatct [1906,1912]
3HSAR000022404_CR000137156 359	gtagt [239,243]	none	none	none
3HSAR000047322_CR000641008 420	gtag [70,73]	ttttaat [373,379]	none	none
3HSAR000013775_CR000084005 557	gtagt [115,119]/gttagt [450,455]	ttttat [200,205]	none	none
3HSAR000053914_CR000786264 263	gtag [190,193]/gtag [233,236]	none	none	none
3HSAR000058530_CR001262513 1391	gtagt [118,122]/gtagt [250,254]/atagt [826,830]/gtagt [1298,1302]/gtagt [1354,1358]	ttttat [777,782]/ttttaat [894,900]	tgtatata [821,828]	none
3HSAR000018414_CR000112718 16	none	none	none	none
3HSAR000053606_CR000782781 769	atagt [347,351]/atagt [639,643]/gtag [718,721]	ttttat [233,238]/ttttat [583,588]	tgtacata [688,695]	tttgtct [200,206]/tttatct [438,444]
3HSAR000060940_CR001382484 468	none	ttttat [423,428]/ttttaat [459,465]	none	none
3HSAR000006113_CR000038008 492	gtag [158,161]/gtag [462,465]	ttttat [120,125]/ttttat [205,210]/ttttaat [230,236]	none	none
3HSAR000046574_CR000635714 543	atagt [307,311]	ttttcat [429,435]	none	none
3HSAR000029338_CR000179382 894	gtagt [163,167]/gtagt [446,450]/gtagt [799,803]	none	tgtaaata [759,766]	none
3HSAR000055002_CR000795776 1331	gtagt [889,893]/atagt [1235,1239]	ttttat [871,876]	none	none
3HSAR000037560_CR000242454 62	none	none	none	none
3HSAR000042213_CR000589928 4903	atagt [625,629]/gtagt [1342,1346]/gtagt [2093,2097]/gtagt [3118,3122]/gtagt [3129,3133]/atagt [3137,3141]/atagt [3306,3310]/atagt [3845,3849]/atagt [3878,3882]/gtag [4575,4578]	ttttat [89,94]/ttttat [216,221]/ttttat [1093,1098]/ttttat [2550,2555]/ttttat [2565,2570]/ttttat [2761,2766]/ttttat [4486,4491]/ttttat [4654,4659]/ttttat [4667,4672]/ttttat [4797,4802]/ttttat [4885,4890]	tgtacata [1181,1188]/tgtacata [2974,2981]	none
3HSAR000016086_CR000098324 454	gtag [231,234]/gtag [315,318]	none	none	none
3HSAR000046048_CR000631618 2384	gtagt [164,168]/gtag [633,636]/gtag [921,924]	none	none	none
3HSAR000016227_CR000099195 3805	gtagt [808,812]/atagt [1443,1447]/gtag [3049,3052]	ttttaat [2274,2280]	none	tttgtct [952,958]/tttatct [3192,3198]
3HSAR000066817_CR001715657 282	none	ttttaaat [271,278]	none	attatct [203,209]
3HSAR000054974_CR000795597 200	none	none	none	none
3HSAR000000174_CR000001108 157	atagt [59,63]	none	none	none
3HSAR000008839_CR000054222 1220	atagt [817,821]/atagt [1126,1130]	ttttat [25,30]/ttttat [35,40]/ttttaat [301,307]/ttttact [385,391]/ttttact [582,588]	none	none
3HSAR000062401_CR001392886 549	atagt [401,405]/atagt [538,542]	ttttcat [475,481]	none	none
3HSAR000016561_CR000101271 2750	atagt [13,17]/atagt [377,381]/atagt [1371,1375]/gtagt [2062,2066]/atagt [2088,2092]/attagt [2279,2284]	ttttat [1198,1203]/ttttat [1507,1512]/ttttat [1753,1758]/ttttat [2201,2206]/ttttcat [2613,2619]	tgtaaata [1174,1181]/tgtacata [1251,1258]	tttgtct [291,297]
3HSAR000025772_CR000157721 147	none	ttttat [114,119]	none	none
3HSAR000049855_CR000731539 518	atagt [301,305]/gtagt [398,402]	ttttat [37,42]/ttttaat [445,451]/ttttaagt [454,461]	none	none
3HSAR000061742_CR001388203 700	atagt [110,114]/gtagt [613,617]/gtag [630,633]	ttttat [85,90]/ttttaaat [425,432]	none	attgtct [565,571]
3HSAR000004826_CR000030100 447	none	ttttact [322,328]	none	none
3HSAR000001702_CR000010555 352	none	none	none	none
3HSAR000041363_CR000581856 2809	gtagt [21,25]/atagt [1587,1591]/atagt [2244,2248]/gtagt [2305,2309]/atagt [2423,2427]/atagt [2575,2579]	ttttat [323,328]/ttttat [1894,1899]/ttttat [2354,2359]	none	tttatct [785,791]
3HSAR000064369_CR001406909 838	gtag [188,191]/gtag [413,416]/gtag [516,519]/gtag [525,528]	none	tgtagata [187,194]	tttgtct [670,676]
3HSAR000022018_CR000134833 832	gtag [429,432]	ttttat [387,392]/ttttat [728,733]	none	none
3HSAR000000318_CR000001888 1220	atagt [1038,1042]	ttttat [1069,1074]	none	none
3HSAR000008417_CR000051656 1122	gttagt [335,340]/gtag [707,710]/gtag [847,850]/gtag [1117,1120]	ttttat [508,513]/ttttat [576,581]/ttttat [582,587]/ttttat [959,964]	tgtatata [525,532]	tttgtct [982,988]/tttgtct [1016,1022]
3HSAR000028831_CR000176318 988	gtagt [367,371]	none	none	none
3HSAR000016367_CR000100067 9143	gtagt [1048,1052]/gtagt [1101,1105]/atagt [1135,1139]/gtagt [2682,2686]/atagt [2903,2907]/atagt [3083,3087]/atagt [3974,3978]/gtagt [4858,4862]/atagt [6462,6466]/atagt [6949,6953]/atagt [7250,7254]/atagt [7616,7620]/atagt [7755,7759]/atagt [8252,8256]/attagt [8521,8526]/gtag [8563,8566]/gtag [8737,8740]/gtag [8851,8854]/gtag [8963,8966]	ttttat [909,914]/ttttat [1258,1263]/ttttat [3187,3192]/ttttat [3322,3327]/ttttat [3940,3945]/ttttat [5536,5541]/ttttat [7650,7655]/ttttat [7810,7815]/ttttat [8390,8395]/ttttat [8875,8880]/ttttat [9058,9063]	tgtacata [6731,6738]/tgtatata [9114,9121]	tttgtct [2250,2256]/attatct [3238,3244]/tttatct [3323,3329]/tttatct [4962,4968]/tttgtct [6143,6149]/attgtct [8883,8889]
3HSAR000031732_CR000193976 5	none	none	none	none
3HSAR000002353_CR000014725 434	gtag [74,77]/gtag [274,277]	ttttat [389,394]	none	none
3HSAR000041779_CR000585558 466	gtagt [86,90]/gtagt [316,320]	ttttat [365,370]	none	none
3HSAR000054617_CR000792978 157	atttagt [24,30]	none	none	none
3HSAR000041052_CR000531621 2467	gtagt [200,204]/gttagt [352,357]/gtag [456,459]/gtag [1055,1058]/gtag [1617,1620]/gtag [2225,2228]	ttttat [494,499]/ttttat [1645,1650]/ttttact [1699,1705]/ttttact [2058,2064]	none	none
3HSAR000032359_CR000197871 140	none	none	none	none
3HSAR000048142_CR000718610 171	none	none	none	none
3HSAR000061785_CR001388512 2217	atagt [284,288]/atagt [298,302]/atagt [319,323]/atagt [658,662]/gtagt [835,839]/atagt [1134,1138]/gtag [1413,1416]/gtag [1756,1759]/gtag [2007,2010]	ttttat [323,328]/ttttat [553,558]/ttttaat [2107,2113]	tgtatata [1125,1132]	tttgtct [1997,2003]
3HSAR000045883_CR000630356 650	gtagt [635,639]	none	none	none
3HSAR000033981_CR000211069 53	none	none	none	none
3HSAR000066730_CR001714504 852	atagt [733,737]	ttttaagt [614,621]	none	none
3HSAR000039195_CR000254208 403	gtag [173,176]	ttttat [189,194]/ttttaat [260,266]	none	none
3HSAR000012982_CR000079078 1988	gtagt [471,475]/gtag [489,492]/gtag [1477,1480]	ttttat [1408,1413]	none	tttatct [1409,1415]
3HSAR000026393_CR000161527 3245	gtagt [561,565]/gtagt [1432,1436]/atagt [3101,3105]	none	tgtaaata [1834,1841]	none
3HSAR000044308_CR000605816 871	atagt [415,419]/gtag [547,550]	ttttat [566,571]	none	tttgtct [433,439]
3HSAR000060422_CR001379300 4380	atagt [3157,3161]/gtag [3530,3533]/gtag [3567,3570]/gtag [4209,4212]/gtag [4264,4267]	ttttat [1832,1837]/ttttat [2489,2494]/ttttcat [3142,3148]	tgtaaata [4232,4239]	none
3HSAR000041598_CR000583783 2840	atagt [968,972]/gtagt [1701,1705]/gtag [2293,2296]	ttttat [2776,2781]	none	none
3HSAR000063086_CR001397769 147	none	none	none	none
3HSAR000052335_CR000749548 82	none	none	none	none
3HSAR000037763_CR000243860 112	none	none	none	tttgtct [5,11]
3HSAR000015814_CR000096608 510	atagt [28,32]/gtag [307,310]	ttttat [97,102]/ttttat [312,317]/ttttaat [481,487]	none	none
3HSAR000022661_CR000138737 427	gtagt [348,352]	ttttat [168,173]/ttttcat [218,224]/ttttcat [385,391]	none	none
3HSAR000056156_CR001224851 7016	atagt [190,194]/gtagt [298,302]/gtagt [1426,1430]/atagt [1884,1888]/atagt [2062,2066]/atagt [2292,2296]/gtagt [3615,3619]/gtagt [4060,4064]/gtagt [4898,4902]/gtagt [5101,5105]/gtagt [6275,6279]/atagt [6617,6621]/atagt [6743,6747]	ttttat [657,662]/ttttat [1733,1738]/ttttat [1949,1954]/ttttat [1955,1960]/ttttat [3815,3820]/ttttat [4677,4682]/ttttat [5447,5452]/ttttat [5897,5902]/ttttat [5918,5923]/ttttaat [6340,6346]	none	tttatct [1956,1962]/attgtct [4763,4769]/attgtct [5399,5405]/tttatct [6488,6494]
3HSAR000052816_CR000753020 385	none	ttttat [52,57]/ttttat [263,268]/ttttat [271,276]	none	none
3HSAR000052068_CR000747494 142	none	none	none	none
3HSAR000001665_CR000010334 64	gtagt [58,62]	none	none	none
3HSAR000008686_CR000053286 285	none	ttttat [241,246]	none	none
3HSAR000050795_CR000738527 4933	gtagt [1711,1715]/atagt [2829,2833]/atagt [3581,3585]/gtagt [3782,3786]/atagt [3834,3838]/gtagt [3875,3879]/atagt [4032,4036]/atagt [4195,4199]/gtagt [4462,4466]/atagt [4701,4705]/gtag [4834,4837]	ttttat [490,495]/ttttat [1085,1090]/ttttat [1402,1407]/ttttat [1408,1413]/ttttat [1488,1493]/ttttat [2182,2187]/ttttaaat [3195,3202]/ttttaaat [4419,4426]/ttttact [4741,4747]	none	tttgtct [904,910]/tttgtct [2875,2881]/tttgtct [4186,4192]
3HSAR000018065_CR000110570 4600	atagt [1256,1260]/atagt [1715,1719]/atagt [1938,1942]/atagt [2299,2303]/gtagt [3973,3977]/atagt [4477,4481]	ttttat [306,311]/ttttat [779,784]/ttttat [1289,1294]/ttttat [1885,1890]/ttttat [2865,2870]/ttttat [3096,3101]/ttttat [4030,4035]/ttttact [4554,4560]	tgtagata [1968,1975]/tgtatata [4047,4054]	attatct [900,906]/tttgtct [997,1003]/tttgtct [1631,1637]
3HSAR000020347_CR000124539 300	none	none	none	none
3HSAR000006924_CR000042998 1262	gtagt [1224,1228]	ttttat [735,740]/ttttcat [1184,1190]	none	tttgtct [809,815]/tttgtct [934,940]/tttgtct [1096,1102]
3HSAR000033942_CR000210771 2794	gtagt [128,132]/gtagt [230,234]/gtagt [1522,1526]/atagt [2323,2327]/gttagt [2628,2633]	ttttat [1912,1917]/ttttat [2680,2685]/ttttat [2718,2723]	none	none
3HSAR000037196_CR000239870 957	gtttagt [5,11]/gtag [696,699]	ttttcat [618,624]/ttttcat [869,875]	none	none
3HSAR000066443_CR001713300 1986	gtagt [351,355]/gtagt [779,783]/atagt [1212,1216]	ttttat [693,698]/ttttat [1782,1787]/ttttat [1789,1794]	none	tttatct [694,700]
3HSAR000009516_CR000058281 81	none	none	none	none
3HSAR000063348_CR001399639 2298	atagt [1696,1700]/gtagt [2087,2091]/gtagt [2213,2217]	ttttat [701,706]/ttttat [711,716]/ttttat [717,722]/ttttat [727,732]/ttttat [1048,1053]/ttttat [1178,1183]/ttttaat [2244,2250]	tgtacata [2013,2020]	attatct [1371,1377]
3HSAR000037877_CR000244673 1500	gtagt [163,167]/atagt [486,490]/atagt [636,640]/gtagt [1300,1304]/atagt [1317,1321]/gtag [1398,1401]	ttttat [175,180]/ttttat [575,580]/ttttat [1289,1294]	tgtacata [631,638]/tgtaaata [1357,1364]	attatct [75,81]/attatct [964,970]
3HSAR000016254_CR000099370 2872	attagt [275,280]/attagt [902,907]/gtag [1662,1665]/gtag [2498,2501]/gtag [2571,2574]	ttttat [37,42]/ttttat [461,466]/ttttat [2109,2114]	tgtacata [1008,1015]/tgtatata [2589,2596]	attgtct [183,189]
3HSAR000047363_CR000641289 4308	gtagt [965,969]/gtagt [1205,1209]/atagt [1947,1951]/gtagt [2003,2007]/gtagt [2323,2327]/atagt [3421,3425]/gtag [3495,3498]/gtag [3641,3644]/gtag [4068,4071]	ttttat [511,516]/ttttat [538,543]/ttttat [802,807]/ttttat [1824,1829]/ttttat [1852,1857]/ttttat [4080,4085]	none	attgtct [1642,1648]/tttatct [2747,2753]
3HSAR000066243_CR001634671 2384	atagt [1815,1819]/atagt [1879,1883]/atagt [1909,1913]/atagt [1926,1930]/attagt [1959,1964]/gtag [2143,2146]	ttttat [32,37]/ttttat [70,75]/ttttat [1516,1521]/ttttat [1548,1553]/ttttat [1670,1675]/ttttat [2375,2380]	none	tttgtct [476,482]
3HSAR000003208_CR000020220 99	none	none	none	none
3HSAR000053375_CR000768693 2319	gttagt [165,170]/gtag [544,547]/gtag [656,659]/gtag [845,848]/gtag [868,871]/gtag [918,921]/gtag [1166,1169]	ttttat [665,670]/ttttat [772,777]/ttttat [1173,1178]/ttttaat [1225,1231]/ttttcat [1309,1315]	none	attatct [1159,1165]
3HSAR000045661_CR000628559 436	gtagt [332,336]	none	none	none
3HSAR000025079_CR000153463 3036	gtagt [2124,2128]/atagt [2160,2164]	ttttat [1029,1034]/ttttaat [2396,2402]	none	none
3HSAR000011851_CR000072233 1233	atttagt [394,400]/gtag [421,424]/gtag [646,649]	ttttat [670,675]	none	none
3HSAR000042564_CR000592643 2453	atagt [35,39]/atagt [647,651]/gtagt [1592,1596]/atagt [1621,1625]/atagt [1714,1718]/atagt [2036,2040]/atagt [2082,2086]/atagt [2097,2101]	ttttat [1916,1921]/ttttact [2301,2307]	tgtacata [991,998]/tgtatata [999,1006]/tgtatata [1010,1017]	tttatct [2225,2231]
3HSAR000032593_CR000199443 3183	atagt [133,137]/gtagt [469,473]/atagt [1291,1295]/atagt [2847,2851]/gtagt [2960,2964]	ttttat [1901,1906]/ttttat [2043,2048]/ttttat [2179,2184]/ttttat [2236,2241]/ttttat [3026,3031]	none	tttatct [2200,2206]/tttatct [2863,2869]
3HSAR000003418_CR000021525 4403	atagt [366,370]/gtagt [1429,1433]/atagt [2762,2766]/atagt [3063,3067]/atagt [4039,4043]	ttttat [944,949]/ttttat [954,959]/ttttat [1075,1080]/ttttat [1953,1958]/ttttat [2950,2955]/ttttat [4030,4035]/ttttat [4057,4062]/ttttat [4193,4198]/ttttat [4208,4213]	tgtatata [563,570]	tttatct [955,961]
3HSAR000052442_CR000750320 172	none	none	none	none
3HSAR000011795_CR000071896 1289	attagt [215,220]/attagt [932,937]/gtag [1020,1023]/gtag [1064,1067]	ttttat [133,138]/ttttat [627,632]/ttttat [635,640]/ttttat [928,933]/ttttat [965,970]/ttttat [1184,1189]	tgtaaata [1251,1258]	tttgtct [65,71]
3HSAR000013502_CR000082274 176	none	ttttat [131,136]	none	none
3HSAR000014333_CR000087459 372	attagt [332,337]	ttttat [213,218]/ttttaat [291,297]/ttttaat [318,324]	none	none
3HSAR000051476_CR000743133 3886	gtagt [857,861]/atagt [1534,1538]/atagt [1780,1784]/atagt [2631,2635]/atagt [3880,3884]	ttttat [590,595]/ttttat [681,686]/ttttat [714,719]/ttttat [1446,1451]/ttttat [1978,1983]/ttttat [2738,2743]	tgtacata [1921,1928]	tttatct [682,688]/tttgtct [2516,2522]/attatct [2729,2735]/tttatct [3175,3181]/tttgtct [3645,3651]
3HSAR000054066_CR000787679 135	atagt [21,25]/attagt [95,100]	none	none	none
3HSAR000017052_CR000104321 5212	atagt [407,411]/atagt [2436,2440]/gtagt [3056,3060]/gtagt [3300,3304]/gtagt [4518,4522]/gtagt [5129,5133]	ttttat [154,159]/ttttat [5020,5025]	tgtacata [470,477]	attatct [441,447]/attatct [498,504]/tttatct [850,856]/attatct [866,872]/attgtct [929,935]/attatct [1061,1067]
3HSAR000014239_CR000086890 870	gtagt [551,555]/atagt [812,816]/atagt [852,856]	none	none	none
3HSAR000058914_CR001369532 1360	atagt [985,989]	none	none	attgtct [56,62]/attgtct [1108,1114]/tttgtct [1248,1254]
3HSAR000021584_CR000132218 982	gtagt [167,171]/atagt [341,345]/gtagt [936,940]	ttttaat [822,828]	none	none
3HSAR000056642_CR001228216 648	gtag [319,322]/gtag [343,346]/gtag [543,546]	none	none	none
3HSAR000055155_CR000796915 929	atagt [124,128]/atagt [238,242]/atagt [371,375]/gtagt [416,420]/gtagt [775,779]/gtag [844,847]	ttttat [182,187]/ttttat [248,253]	tgtaaata [133,140]/tgtaaata [541,548]	attatct [626,632]
3HSAR000059696_CR001374965 1047	gtag [623,626]/gtag [655,658]	none	none	none
3HSAR000034284_CR000213445 207	gtag [5,8]/gtag [167,170]	ttttat [76,81]	none	none
3HSAR000027632_CR000169087 2201	gtagt [514,518]/gtagt [1719,1723]/gtagt [1780,1784]/atagt [1963,1967]	ttttaaat [488,495]/ttttcat [549,555]	none	none
3HSAR000033166_CR000204847 3570	gtagt [460,464]/atagt [516,520]/atagt [1938,1942]/attagt [2572,2577]/gtag [3315,3318]	ttttat [126,131]/ttttat [757,762]/ttttat [1156,1161]/ttttat [2246,2251]/ttttat [2414,2419]/ttttat [3278,3283]/ttttaagt [3436,3443]/ttttact [3521,3527]	none	tttgtct [1234,1240]/tttgtct [2283,2289]/attgtct [2990,2996]
3HSAR000016863_CR000103142 1095	gtagt [1062,1066]	ttttat [668,673]	none	attgtct [660,666]
3HSAR000005158_CR000032148 128	none	ttttat [3,8]/ttttat [75,80]	none	none
3HSAR000030946_CR000189260 2201	gtagt [514,518]/gtagt [1719,1723]/gtagt [1780,1784]/atagt [1963,1967]	ttttaaat [488,495]/ttttcat [549,555]	none	none
3HSAR000011438_CR000069725 268	gtagt [61,65]	none	none	none
3HSAR000026061_CR000159491 19	none	none	none	none
3HSAR000012401_CR000075534 1062	gtag [115,118]	none	tgtatata [923,930]	none
3HSAR000025901_CR000158512 684	atagt [376,380]/gtagt [559,563]/atttagt [572,578]	ttttat [431,436]/ttttat [472,477]	tgtaaata [95,102]/tgtacata [137,144]/tgtaaata [620,627]	tttgtct [608,614]
3HSAR000050507_CR000736366 131	none	none	none	none
3HSAR000054163_CR000788599 388	none	none	none	none
3HSAR000030826_CR000188529 273	atagt [77,81]/gtagt [102,106]/gtag [190,193]	ttttat [108,113]/ttttat [216,221]/ttttaat [240,246]	tgtaaata [248,255]	none
3HSAR000029319_CR000179263 337	gtagt [130,134]	none	none	none
3HSAR000001024_CR000006365 550	gtagt [417,421]	ttttat [478,483]/ttttat [499,504]	none	none
3HSAR000007451_CR000046133 851	none	ttttaaat [833,840]	none	none
3HSAR000040582_CR000372226 1254	gtag [859,862]	none	none	none
3HSAR000028658_CR000175269 1671	atagt [1227,1231]/atagt [1261,1265]	ttttat [789,794]	none	tttgtct [1103,1109]/tttgtct [1508,1514]
3HSAR000004838_CR000030181 3442	atagt [791,795]/gtagt [817,821]/gtagt [1439,1443]/gtagt [1678,1682]/gtagt [2211,2215]/atagt [2267,2271]/atagt [2560,2564]/gtagt [2727,2731]/atagt [2837,2841]/atagt [3249,3253]	ttttat [75,80]/ttttat [533,538]/ttttat [920,925]/ttttat [2742,2747]/ttttat [3340,3345]	tgtaaata [2832,2839]/tgtatata [3309,3316]/tgtaaata [3400,3407]	tttatct [577,583]/tttgtct [627,633]/tttgtct [1959,1965]
3HSAR000051856_CR000745901 306	attagt [93,98]	none	none	none
3HSAR000037181_CR000239766 2514	atagt [898,902]/gtagt [1299,1303]/gtagt [1983,1987]	ttttat [91,96]/ttttat [1742,1747]/ttttat [2393,2398]/ttttat [2432,2437]	none	tttgtct [1699,1705]
3HSAR000059270_CR001372020 259	atttagt [71,77]	ttttat [65,70]/ttttat [165,170]	none	none
3HSAR000052742_CR000752496 1511	attagt [1077,1082]/gtag [1125,1128]/gtag [1191,1194]/gtag [1322,1325]	ttttat [1136,1141]/ttttcat [1437,1443]	none	none
3HSAR000014332_CR000087454 372	attagt [332,337]	ttttat [213,218]/ttttaat [291,297]/ttttaat [318,324]	none	none
3HSAR000010270_CR000062800 8721	atagt [1193,1197]/gtagt [1569,1573]/atagt [2467,2471]/atagt [2698,2702]/atagt [2919,2923]/atagt [4114,4118]/atagt [5043,5047]/gtagt [5417,5421]/atagt [5448,5452]/gtagt [5841,5845]/atagt [6416,6420]/gtagt [6706,6710]/atttagt [8293,8299]	ttttat [1255,1260]/ttttat [1768,1773]/ttttat [3263,3268]/ttttat [3536,3541]/ttttat [3570,3575]/ttttat [4149,4154]/ttttat [8679,8684]	tgtaaata [2111,2118]	tttatct [4150,4156]/tttgtct [7167,7173]
3HSAR000040174_CR000261678 700	gtag [267,270]	ttttaaat [661,668]	none	attgtct [514,520]/tttgtct [653,659]
3HSAR000034835_CR000218111 5126	atagt [127,131]/gtagt [361,365]/gtagt [486,490]/gtagt [1233,1237]/atagt [1682,1686]/atagt [2166,2170]/atagt [4495,4499]/attagt [4749,4754]	ttttat [632,637]/ttttat [4055,4060]/ttttaaat [5027,5034]	tgtatata [1719,1726]/tgtacata [1779,1786]	tttatct [1438,1444]/attatct [1695,1701]
3HSAR000063288_CR001399207 186	none	none	none	none
3HSAR000041762_CR000585430 2171	gtagt [312,316]/atagt [1011,1015]/atagt [1025,1029]/gtagt [1526,1530]/atagt [2015,2019]	ttttat [135,140]/ttttat [631,636]/ttttat [1637,1642]	tgtaaata [538,545]/tgtaaata [1852,1859]	tttatct [490,496]/attgtct [625,631]
3HSAR000005027_CR000031352 3721	gtagt [124,128]/atagt [159,163]/atagt [593,597]/atagt [1168,1172]/atagt [1276,1280]/atagt [1308,1312]/atagt [1616,1620]/atagt [2196,2200]/atagt [2206,2210]/gtagt [3050,3054]/gtagt [3626,3630]/atagt [3676,3680]	ttttat [1675,1680]/ttttat [2016,2021]/ttttat [2179,2184]/ttttat [2298,2303]/ttttat [3153,3158]	tgtatata [1536,1543]	tttatct [1145,1151]/tttgtct [1344,1350]/tttatct [1676,1682]
3HSAR000020814_CR000127437 3101	atagt [806,810]/atagt [1200,1204]/atagt [1793,1797]/atagt [1863,1867]/atagt [3031,3035]	ttttat [534,539]/ttttat [926,931]/ttttat [1264,1269]/ttttat [1680,1685]/ttttat [2877,2882]/ttttat [2944,2949]	none	tttgtct [2793,2799]
3HSAR000002007_CR000012506 2125	atagt [226,230]/atagt [507,511]/atagt [1551,1555]/gttagt [1615,1620]/gtag [1675,1678]/gtag [1778,1781]/gtag [1928,1931]/gtag [1994,1997]	ttttat [1018,1023]/ttttat [1528,1533]/ttttcat [1817,1823]	none	tttgtct [191,197]/attgtct [1124,1130]
3HSAR000000553_CR000003471 234	none	none	none	none
3HSAR000015446_CR000094338 327	gtag [2,5]/gtag [103,106]	none	none	none
3HSAR000023617_CR000144534 1	none	none	none	none
3HSAR000026741_CR000163670 5	none	none	none	none
3HSAR000008311_CR000051017 2307	atagt [296,300]/atagt [584,588]/atagt [1155,1159]/atagt [1320,1324]/atagt [1567,1571]/atagt [1596,1600]/gtagt [1826,1830]/gtag [1946,1949]	ttttat [254,259]/ttttat [869,874]/ttttat [1032,1037]/ttttat [1135,1140]/ttttat [1211,1216]/ttttat [1279,1284]/ttttat [1324,1329]/ttttat [1552,1557]/ttttat [1761,1766]/ttttat [2100,2105]/ttttat [2143,2148]/ttttaagt [2297,2304]	tgtaaata [1707,1714]/tgtagata [1945,1952]/tgtaaata [2185,2192]	tttgtct [727,733]/tttatct [845,851]/tttatct [1033,1039]/tttatct [1553,1559]/tttgtct [1921,1927]
3HSAR000048628_CR000722292 820	gtag [223,226]/gtag [248,251]/gtag [357,360]	none	none	none
3HSAR000013037_CR000079426 161	gtag [31,34]	ttttaat [119,125]	none	none
3HSAR000063806_CR001402856 1475	gtagt [18,22]/atagt [1377,1381]	ttttat [72,77]/ttttaaat [692,699]	none	tttgtct [848,854]
3HSAR000028579_CR000174791 772	gtagt [600,604]/gtag [675,678]	ttttat [338,343]/ttttaat [418,424]	none	none
3HSAR000022339_CR000136770 171	none	none	none	none
3HSAR000054292_CR000789912 1393	atagt [665,669]/atagt [820,824]/atagt [1101,1105]/gtag [1182,1185]/gtag [1264,1267]	ttttat [1192,1197]/ttttaat [1200,1206]	none	attgtct [1235,1241]
3HSAR000062030_CR001390233 3136	gtagt [237,241]/gtag [1976,1979]/gtag [2158,2161]	none	tgtaaata [896,903]	none
3HSAR000034253_CR000213200 429	none	ttttat [415,420]	tgtaaata [349,356]/tgtaaata [368,375]	none
3HSAR000006900_CR000042852 3414	gtagt [932,936]/atagt [1129,1133]/gtagt [1474,1478]/atagt [1480,1484]/gtagt [1712,1716]/gtagt [1758,1762]/gtagt [1879,1883]/gtagt [1919,1923]/atagt [2459,2463]/atagt [2485,2489]/gtagt [2644,2648]/atagt [2996,3000]/gtagt [3278,3282]/gtagt [3348,3352]	ttttat [1248,1253]/ttttat [1548,1553]/ttttat [1835,1840]/ttttat [2043,2048]/ttttat [3321,3326]/ttttat [3332,3337]	tgtatata [83,90]/tgtatata [2454,2461]	attgtct [262,268]/tttgtct [3300,3306]
3HSAR000053171_CR000755636 844	none	none	none	none
3HSAR000048498_CR000721319 4459	atagt [2550,2554]/atagt [2589,2593]/atagt [2984,2988]/atagt [3328,3332]/attagt [3828,3833]/attagt [3840,3845]/gttagt [4073,4078]	ttttat [969,974]/ttttat [1779,1784]/ttttat [1889,1894]/ttttat [3824,3829]/ttttaat [4243,4249]	none	tttgtct [3570,3576]/tttgtct [3761,3767]
3HSAR000043155_CR000597140 122	none	none	none	none
3HSAR000057166_CR001252366 4186	atagt [420,424]/atagt [2194,2198]/atagt [2447,2451]/gtagt [3155,3159]/gtagt [3561,3565]/gttagt [4079,4084]	ttttat [1673,1678]/ttttat [1942,1947]/ttttcat [2947,2953]	tgtagata [2262,2269]	tttgtct [3259,3265]/tttatct [3565,3571]/tttatct [4135,4141]
3HSAR000004718_CR000029451 1126	atagt [907,911]/atttagt [990,996]/gtag [1052,1055]	ttttat [977,982]/ttttat [986,991]	tgtatata [596,603]/tgtaaata [902,909]/tgtaaata [1079,1086]	tttgtct [26,32]/attgtct [499,505]
3HSAR000024527_CR000150057 262	atagt [56,60]/gtagt [72,76]	none	none	none
3HSAR000026972_CR000165055 619	gtagt [406,410]/atagt [599,603]	none	none	none
3HSAR000001568_CR000009749 450	gttagt [279,284]	none	none	none
3HSAR000035003_CR000219310 1224	gtag [524,527]	ttttat [980,985]	none	none
3HSAR000062797_CR001395747 1053	gtagt [793,797]	ttttat [285,290]/ttttaat [291,297]/ttttaat [423,429]/ttttaat [1002,1008]	none	none
3HSAR000043422_CR000599155 2595	gtagt [2037,2041]/atagt [2464,2468]/gtttagt [2541,2547]	ttttat [353,358]/ttttat [372,377]/ttttat [699,704]/ttttat [1379,1384]/ttttat [1692,1697]/ttttat [2357,2362]	tgtaaata [1504,1511]	tttgtct [467,473]/tttgtct [1850,1856]
3HSAR000050312_CR000734919 970	gtag [404,407]/gtag [459,462]	ttttat [897,902]/ttttat [912,917]/ttttat [927,932]	none	tttgtct [957,963]
3HSAR000064428_CR001407322 2913	gtagt [77,81]/atagt [344,348]/gtagt [646,650]/gtagt [773,777]/atagt [1086,1090]/gtagt [1156,1160]/atagt [1385,1389]/gtagt [1805,1809]/atagt [2287,2291]/gtag [2293,2296]/gtag [2360,2363]/gtag [2700,2703]	ttttact [329,335]/ttttact [946,952]/ttttact [2805,2811]	none	tttatct [2906,2912]
3HSAR000065587_CR001630102 945	atagt [670,674]	ttttat [907,912]	tgtacata [938,945]	none
3HSAR000046314_CR000633933 1001	atagt [98,102]/gtag [291,294]/gtag [583,586]	ttttat [78,83]/ttttat [810,815]	none	tttgtct [224,230]
3HSAR000029694_CR000181563 1025	atagt [148,152]/gtagt [400,404]/gtag [407,410]	ttttat [943,948]/ttttcat [966,972]	tgtagata [352,359]	attatct [544,550]
3HSAR000066210_CR001634507 464	none	none	none	none
3HSAR000039998_CR000260340 230	none	none	none	none
3HSAR000010668_CR000065177 4557	atagt [403,407]/atagt [1286,1290]/atagt [1726,1730]/atagt [1789,1793]/gtagt [2119,2123]/atagt [2440,2444]/atagt [3688,3692]/atagt [3927,3931]/gtagt [4211,4215]/gtag [4342,4345]	ttttat [407,412]/ttttat [681,686]/ttttat [1135,1140]/ttttat [1872,1877]/ttttat [3473,3478]/ttttat [4196,4201]/ttttat [4519,4524]	tgtacata [937,944]/tgtaaata [2144,2151]/tgtatata [2484,2491]	tttatct [340,346]/tttatct [553,559]/attatct [1329,1335]/tttgtct [4119,4125]
3HSAR000036262_CR000233081 5989	gtagt [807,811]/gtagt [3194,3198]/atagt [3813,3817]/gtagt [4874,4878]/atagt [5242,5246]/gtagt [5572,5576]/gtag [5727,5730]	ttttat [4115,4120]	tgtatata [1954,1961]	tttgtct [1299,1305]/tttatct [2048,2054]/tttatct [3781,3787]/attgtct [5130,5136]
3HSAR000049164_CR000726452 1084	atagt [373,377]/gtag [640,643]/gtag [696,699]	ttttat [793,798]	none	tttgtct [434,440]/tttgtct [579,585]
3HSAR000012087_CR000073654 456	gtag [63,66]/gtag [79,82]	ttttat [305,310]	none	none
3HSAR000023127_CR000141558 295	atagt [78,82]/gttagt [123,128]/gtag [241,244]	none	none	none
3HSAR000043456_CR000599382 1130	gtagt [29,33]/atagt [148,152]/gtag [432,435]/gtag [855,858]/gtag [882,885]/gtag [987,990]	ttttat [334,339]/ttttat [495,500]/ttttat [511,516]/ttttat [634,639]/ttttat [691,696]/ttttat [712,717]/ttttat [843,848]/ttttat [934,939]	none	tttatct [244,250]/attgtct [941,947]/tttatct [1019,1025]
3HSAR000016851_CR000103066 273	none	none	none	none
3HSAR000023054_CR000141108 1271	atagt [493,497]/gtagt [698,702]	ttttact [933,939]	tgtacata [409,416]/tgtatata [637,644]	none
3HSAR000062522_CR001393741 1516	gtag [225,228]	none	none	none
3HSAR000024670_CR000150945 283	gtag [11,14]/gtag [229,232]	none	none	none
3HSAR000048201_CR000719035 532	none	none	none	tttatct [282,288]
3HSAR000062019_CR001390150 916	atagt [536,540]/gtag [549,552]/gtag [733,736]	ttttat [637,642]/ttttat [773,778]/ttttat [783,788]	none	none
3HSAR000058212_CR001260091 84	atagt [7,11]/gtag [45,48]/gtag [73,76]	none	tgtacata [30,37]	none
3HSAR000052192_CR000748556 241	none	none	none	none
3HSAR000027875_CR000170514 574	atagt [413,417]/gttagt [445,450]/attagt [539,544]	ttttat [523,528]	none	attgtct [560,566]
3HSAR000057941_CR001258048 2247	atagt [1376,1380]/gtagt [1435,1439]/atagt [1961,1965]/attagt [2144,2149]	ttttaat [1928,1934]/ttttcat [1954,1960]	none	none
3HSAR000047823_CR000716115 1591	gtagt [1171,1175]/gtagt [1541,1545]	ttttat [448,453]/ttttat [779,784]/ttttaat [924,930]	tgtatata [877,884]	tttgtct [285,291]
3HSAR000038404_CR000248361 1433	none	none	none	none
3HSAR000055767_CR001047208 3301	atagt [978,982]/atagt [1701,1705]/gtagt [2883,2887]	ttttat [265,270]/ttttat [1598,1603]/ttttat [2060,2065]/ttttact [3196,3202]	tgtacata [880,887]/tgtatata [1150,1157]/tgtatata [1164,1171]	none
3HSAR000053903_CR000786161 399	gtag [44,47]	ttttaat [287,293]/ttttaat [339,345]	none	none
3HSAR000049422_CR000728331 119	none	none	none	none
3HSAR000022283_CR000136434 131	atttagt [37,43]/gtag [69,72]	none	none	none
3HSAR000036766_CR000236787 2317	gtagt [352,356]/gtagt [633,637]/atagt [640,644]/gttagt [1266,1271]/attagt [1645,1650]/gtag [2063,2066]	ttttat [522,527]/ttttat [1253,1258]/ttttat [1614,1619]	tgtacata [1488,1495]	none
3HSAR000060324_CR001378616 532	none	none	none	none
3HSAR000019633_CR000120144 1258	attagt [1091,1096]	ttttat [844,849]/ttttat [1129,1134]/ttttat [1161,1166]	none	tttatct [375,381]
3HSAR000032077_CR000196094 409	atagt [96,100]	ttttat [188,193]/ttttact [268,274]	none	none
3HSAR000050199_CR000734073 941	gtagt [785,789]	ttttat [931,936]	tgtaaata [405,412]/tgtatata [551,558]	none
3HSAR000041454_CR000582561 1315	gtagt [836,840]/gtagt [1091,1095]/gtagt [1278,1282]	ttttat [1080,1085]/ttttat [1095,1100]/ttttaat [1193,1199]	none	none
3HSAR000001740_CR000010789 4323	gtagt [767,771]/atagt [1080,1084]/gtagt [1376,1380]/atagt [2266,2270]/gtagt [2399,2403]/gtagt [3131,3135]/gtagt [3391,3395]/gtagt [3476,3480]/gtag [3989,3992]/gtag [4078,4081]	ttttat [895,900]/ttttat [2647,2652]/ttttat [4042,4047]	tgtaaata [785,792]	none
3HSAR000021482_CR000131594 5330	atagt [81,85]/gtagt [178,182]/gtagt [590,594]/gtagt [1742,1746]/atagt [1756,1760]/atagt [2155,2159]/gtagt [2841,2845]/atagt [2874,2878]/atagt [3062,3066]/atagt [3313,3317]/atagt [3533,3537]/gtagt [4061,4065]/atagt [4428,4432]/atagt [4614,4618]/atagt [4798,4802]/gtagt [4838,4842]/atagt [5241,5245]/gtag [5255,5258]	ttttat [1229,1234]/ttttat [4130,4135]/ttttat [4680,4685]/ttttat [5202,5207]	tgtatata [765,772]/tgtaaata [1341,1348]/tgtagata [2150,2157]/tgtagata [2869,2876]/tgtacata [3080,3087]/tgtagata [4766,4773]/tgtacata [5177,5184]/tgtacata [5236,5243]	attatct [2794,2800]
3HSAR000022475_CR000137597 1283	gtagt [129,133]/gtag [946,949]	ttttat [55,60]/ttttat [445,450]/ttttat [1135,1140]	tgtatata [1094,1101]	attgtct [275,281]/tttgtct [533,539]
3HSAR000039088_CR000253418 897	atagt [707,711]	ttttat [194,199]/ttttat [202,207]/ttttaat [835,841]	none	none
3HSAR000027782_CR000169945 996	atagt [229,233]/atagt [605,609]/attagt [614,619]	ttttat [667,672]/ttttat [864,869]	none	none
3HSAR000020549_CR000125790 364	none	none	none	none
3HSAR000039096_CR000253476 573	gtag [216,219]	ttttaat [563,569]	none	none
3HSAR000013013_CR000079270 507	gtagt [24,28]/gtag [352,355]	ttttat [468,473]	none	tttatct [179,185]
3HSAR000035895_CR000230459 582	atagt [247,251]	ttttat [223,228]	none	none
3HSAR000066115_CR001633991 911	atagt [541,545]/gttagt [802,807]	ttttat [119,124]/ttttat [141,146]/ttttat [253,258]/ttttat [499,504]/ttttat [697,702]	tgtatata [161,168]	none
3HSAR000023464_CR000143600 343	none	none	none	none
3HSAR000007374_CR000045671 2057	gtagt [144,148]/gtagt [829,833]/atagt [1015,1019]/atagt [1982,1986]	ttttat [1348,1353]	none	none
3HSAR000056801_CR001249757 4064	atagt [2792,2796]/gtag [2831,2834]/gtag [3132,3135]/gtag [3380,3383]	ttttaaat [1637,1644]	tgtaaata [3468,3475]	attgtct [254,260]/attgtct [809,815]
3HSAR000014840_CR000090585 1211	gtagt [1041,1045]/atagt [1109,1113]/atagt [1183,1187]	none	tgtacata [803,810]/tgtacata [1063,1070]/tgtaaata [1187,1194]	none
3HSAR000025363_CR000155207 3440	atagt [953,957]/atagt [3281,3285]	ttttat [2945,2950]	tgtacata [2471,2478]	none
3HSAR000055462_CR000799320 1053	gtagt [686,690]	none	none	none
3HSAR000025738_CR000157512 672	gtagt [410,414]	ttttat [535,540]/ttttat [584,589]/ttttcat [600,606]	none	tttatct [608,614]
3HSAR000029702_CR000181612 216	attagt [66,71]/attagt [207,212]	none	none	none
3HSAR000022384_CR000137039 470	gttagt [214,219]/gtag [381,384]	ttttat [285,290]	none	none
3HSAR000043856_CR000602339 438	none	none	none	none
3HSAR000032539_CR000199098 1608	atagt [430,434]/gttagt [699,704]/gtag [1245,1248]/gtag [1441,1444]/gtag [1518,1521]/gtag [1565,1568]	ttttat [443,448]/ttttat [828,833]	tgtacata [793,800]	none
3HSAR000018424_CR000112781 74	none	ttttat [28,33]	none	none
3HSAR000066008_CR001633362 5915	gtagt [607,611]/atagt [1197,1201]/gtagt [2061,2065]/gtagt [2203,2207]/atagt [2460,2464]/atagt [5120,5124]/atagt [5187,5191]/atagt [5236,5240]/atagt [5779,5783]/atagt [5871,5875]	ttttat [949,954]/ttttat [1028,1033]/ttttat [1068,1073]/ttttat [4116,4121]/ttttat [4454,4459]/ttttat [4843,4848]/ttttat [5551,5556]/ttttat [5699,5704]	tgtatata [435,442]/tgtaaata [4958,4965]/tgtaaata [4970,4977]/tgtaaata [5822,5829]	tttgtct [3297,3303]/tttatct [4844,4850]/attatct [5513,5519]
3HSAR000059261_CR001371963 620	gtag [507,510]	none	none	none
3HSAR000058949_CR001369785 1464	gtagt [485,489]	none	none	none
3HSAR000037535_CR000242278 73	none	none	none	none
3HSAR000022613_CR000138440 1689	attagt [440,445]/gtag [729,732]/gtag [1063,1066]/gtag [1118,1121]/gtag [1331,1334]	ttttaat [778,784]	tgtacata [540,547]/tgtacata [1510,1517]	none
3HSAR000061242_CR001384647 3750	atagt [1382,1386]/atagt [2414,2418]/gtagt [3075,3079]/atagt [3132,3136]/gtagt [3680,3684]	ttttat [264,269]/ttttat [827,832]/ttttat [840,845]/ttttat [849,854]/ttttaaat [3029,3036]	none	tttatct [850,856]
3HSAR000024902_CR000152377 105	gtag [16,19]	ttttaat [35,41]	none	none
3HSAR000036836_CR000237309 1266	atagt [327,331]/gtagt [763,767]/atagt [1022,1026]/gtag [1090,1093]	ttttat [392,397]/ttttat [549,554]/ttttat [685,690]/ttttat [754,759]	none	tttatct [1118,1124]
3HSAR000048736_CR000723208 749	gtag [401,404]	none	none	none
3HSAR000047935_CR000717064 6701	gtagt [1602,1606]/atagt [1778,1782]/gtagt [5474,5478]/gtagt [5599,5603]	ttttat [486,491]/ttttat [891,896]/ttttat [1739,1744]/ttttat [1791,1796]/ttttat [2226,2231]/ttttat [3634,3639]/ttttat [5562,5567]/ttttat [6113,6118]/ttttaaat [6411,6418]/ttttact [6465,6471]	none	tttatct [487,493]/attgtct [2672,2678]/tttatct [5563,5569]
3HSAR000037432_CR000241561 68	gttagt [9,14]	none	none	none
3HSAR000064593_CR001408572 518	none	none	none	tttgtct [98,104]
3HSAR000022186_CR000135842 55	none	none	none	none
3HSAR000037018_CR000238606 3879	atagt [219,223]/atagt [367,371]/gtagt [1040,1044]/atagt [3132,3136]/atagt [3408,3412]/gttagt [3429,3434]/attagt [3736,3741]	ttttat [1145,1150]/ttttat [1644,1649]/ttttat [3334,3339]/ttttat [3446,3451]	none	tttgtct [742,748]/tttgtct [2256,2262]/tttatct [2434,2440]/tttatct [2469,2475]/attatct [2554,2560]
3HSAR000016201_CR000099034 798	gtag [425,428]	none	none	none
3HSAR000010945_CR000066832 469	atttagt [281,287]/gtag [386,389]	none	none	none
3HSAR000066657_CR001714193 2918	gtagt [409,413]/gtagt [456,460]/atagt [1378,1382]/atagt [1755,1759]/atagt [2473,2477]/gtag [2552,2555]	ttttat [550,555]/ttttat [2648,2653]/ttttact [2675,2681]	none	none
3HSAR000065139_CR001412638 430	atagt [85,89]/atagt [136,140]/attagt [217,222]	none	none	none
3HSAR000002204_CR000013790 1262	gtag [277,280]	ttttat [1036,1041]/ttttat [1060,1065]/ttttaaat [1120,1127]	none	none
3HSAR000017516_CR000107197 76	none	none	none	none
3HSAR000028519_CR000174427 597	gtag [304,307]/gtag [581,584]	none	none	none
3HSAR000050477_CR000736144 993	gtagt [168,172]/gtagt [975,979]	ttttaaat [286,293]/ttttact [432,438]	none	none
3HSAR000035073_CR000219832 175	gtag [8,11]/gtag [64,67]	none	none	none
3HSAR000057303_CR001253270 1320	gtagt [1091,1095]	ttttat [792,797]/ttttat [834,839]/ttttat [1055,1060]/ttttat [1154,1159]/ttttat [1216,1221]/ttttcat [1240,1246]	none	none
3HSAR000055217_CR000797375 1938	gtagt [1057,1061]	ttttat [75,80]	none	tttatct [631,637]/tttgtct [1862,1868]
3HSAR000031335_CR000191563 155	none	none	tgtacata [80,87]	none
3HSAR000032083_CR000196130 198	gttagt [78,83]	none	none	none
3HSAR000023901_CR000146263 529	gtagt [195,199]	none	none	none
3HSAR000008764_CR000053755 51	none	none	none	none
3HSAR000034855_CR000218254 662	gtagt [402,406]	none	none	none
3HSAR000017630_CR000107894 1393	atagt [354,358]/atagt [401,405]/atagt [867,871]/atagt [1028,1032]/gtag [1383,1386]	ttttat [154,159]/ttttat [345,350]/ttttat [601,606]/ttttat [871,876]/ttttat [1135,1140]/ttttat [1182,1187]	none	tttatct [602,608]
3HSAR000002333_CR000014605 114	none	none	none	none
3HSAR000017514_CR000107185 4857	atagt [409,413]/atagt [487,491]/atagt [1147,1151]/atagt [1429,1433]/atagt [2068,2072]/atagt [3128,3132]/gtagt [3523,3527]/atagt [4762,4766]/gtagt [4794,4798]	ttttat [1235,1240]/ttttat [1789,1794]/ttttat [2572,2577]/ttttat [2634,2639]/ttttat [2824,2829]/ttttat [2982,2987]/ttttat [4039,4044]/ttttat [4066,4071]/ttttat [4387,4392]/ttttat [4538,4543]/ttttat [4694,4699]/ttttaaat [4752,4759]	tgtagata [1919,1926]/tgtagata [2340,2347]/tgtaaata [4484,4491]/tgtaaata [4620,4627]	tttgtct [540,546]/tttatct [3847,3853]/tttgtct [4457,4463]
3HSAR000044890_CR000620246 283	none	none	none	tttatct [243,249]
3HSAR000055012_CR000795848 1369	atagt [962,966]/gtagt [1129,1133]/atagt [1135,1139]	ttttat [1214,1219]/ttttaat [1255,1261]/ttttaat [1337,1343]/ttttact [1351,1357]	none	none
3HSAR000042011_CR000587834 1078	atagt [316,320]/gtag [392,395]/gtag [1061,1064]	ttttat [431,436]/ttttaaat [690,697]	tgtatata [738,745]	none
3HSAR000014631_CR000089294 1572	atagt [1224,1228]	ttttaat [1560,1566]	none	attgtct [471,477]
3HSAR000058690_CR001367995 440	none	ttttaat [410,416]	none	none
3HSAR000003599_CR000022649 350	gtag [250,253]	none	none	none
3HSAR000052781_CR000752776 1634	atagt [93,97]/atagt [199,203]/atagt [728,732]/atagt [1288,1292]/gtagt [1340,1344]/gtagt [1561,1565]	ttttat [994,999]/ttttat [1365,1370]/ttttat [1490,1495]/ttttat [1572,1577]/ttttat [1590,1595]/ttttat [1615,1620]	none	tttatct [1573,1579]
3HSAR000009823_CR000060115 141	gtag [126,129]	none	none	none
3HSAR000055913_CR001222961 318	none	ttttat [60,65]/ttttat [242,247]	none	none
3HSAR000054015_CR000787207 990	atagt [645,649]/gtagt [698,702]/atagt [875,879]/atttagt [932,938]	ttttat [632,637]/ttttat [922,927]/ttttat [982,987]	none	tttatct [923,929]
3HSAR000031265_CR000191140 214	none	none	none	attatct [95,101]/tttgtct [203,209]
3HSAR000010057_CR000061505 490	gtagt [131,135]/atagt [239,243]	ttttact [408,414]	none	none
3HSAR000024764_CR000151521 1702	attagt [1513,1518]	none	none	none
3HSAR000015370_CR000093871 1328	gtag [336,339]	ttttat [823,828]/ttttat [1168,1173]	none	none
3HSAR000023044_CR000141048 2291	atagt [308,312]/gtagt [1556,1560]/gtag [1662,1665]	none	none	attgtct [1428,1434]
3HSAR000065769_CR001631137 1594	gtag [36,39]/gtag [971,974]/gtag [1542,1545]	none	none	tttgtct [948,954]
3HSAR000022524_CR000137904 4133	atttagt [429,435]/gtag [529,532]/gtag [994,997]/gtag [1057,1060]/gtag [1836,1839]/gtag [1889,1892]/gtag [2131,2134]/gtag [2229,2232]/gtag [2384,2387]/gtag [2473,2476]/gtag [2741,2744]/gtag [3569,3572]/gtag [3579,3582]/gtag [3885,3888]/gtag [4125,4128]	ttttat [380,385]/ttttat [493,498]/ttttat [1256,1261]/ttttat [2858,2863]/ttttat [3634,3639]/ttttaat [4005,4011]	tgtacata [3014,3021]	tttatct [381,387]/tttatct [420,426]/attgtct [1064,1070]/tttgtct [2885,2891]
3HSAR000053069_CR000754885 286	gtag [163,166]/gtag [192,195]	ttttcat [219,225]	none	none
3HSAR000057942_CR001258055 241	gtag [18,21]	ttttat [232,237]	none	none
3HSAR000059823_CR001375669 757	atagt [91,95]/atagt [714,718]	ttttat [175,180]/ttttat [262,267]/ttttact [396,402]/ttttact [442,448]	none	none
3HSAR000031293_CR000191309 215	none	none	none	none
3HSAR000037740_CR000243704 344	atagt [199,203]	ttttat [214,219]	none	none
3HSAR000045134_CR000625158 147	none	none	none	none
3HSAR000034983_CR000219174 2336	gtagt [1987,1991]	ttttat [709,714]/ttttat [744,749]/ttttat [1205,1210]/ttttat [1231,1236]/ttttat [1241,1246]	tgtaaata [695,702]	tttatct [1969,1975]
3HSAR000020086_CR000122911 205	none	ttttat [36,41]	none	tttatct [37,43]
3HSAR000038112_CR000246336 3888	gtagt [1151,1155]/gtagt [1352,1356]/atagt [2257,2261]/gtagt [3176,3180]/gtagt [3369,3373]/gtag [3700,3703]/gtag [3734,3737]/gtag [3762,3765]	ttttat [819,824]/ttttat [1024,1029]/ttttat [3500,3505]	none	attgtct [2570,2576]
3HSAR000041457_CR000582582 1767	gtagt [303,307]/atagt [397,401]/atagt [540,544]/atagt [564,568]/gtagt [820,824]/atagt [837,841]/atagt [1156,1160]/gtagt [1227,1231]/atagt [1334,1338]/gtag [1427,1430]	ttttat [477,482]/ttttat [1139,1144]/ttttat [1373,1378]/ttttaat [1410,1416]	none	tttatct [1484,1490]
3HSAR000064054_CR001404635 610	atagt [112,116]	ttttaat [139,145]/ttttaagt [289,296]	none	none
3HSAR000045138_CR000625176 2013	atagt [187,191]/atagt [903,907]/gtag [1779,1782]/gtag [1922,1925]	ttttat [554,559]/ttttaaat [814,821]/ttttact [1278,1284]	none	attgtct [1373,1379]
3HSAR000013025_CR000079345 2884	gtagt [295,299]/atagt [350,354]/atagt [839,843]/gtagt [1000,1004]/gtagt [1924,1928]/atagt [2010,2014]/gtagt [2223,2227]/gtagt [2423,2427]/attagt [2458,2463]/gtag [2627,2630]	ttttat [50,55]/ttttat [1039,1044]/ttttat [1304,1309]/ttttat [1465,1470]/ttttat [1740,1745]/ttttat [1970,1975]/ttttat [2366,2371]/ttttat [2591,2596]	tgtaaata [924,931]/tgtacata [1267,1274]	tttatct [1542,1548]
3HSAR000061584_CR001387050 273	none	ttttat [207,212]	tgtaaata [66,73]	tttgtct [110,116]
3HSAR000049559_CR000729317 454	gtttagt [191,197]/gtag [218,221]	ttttat [197,202]/ttttaat [271,277]	none	none
3HSAR000002512_CR000015759 167	none	none	none	none
3HSAR000024153_CR000147782 346	atagt [322,326]	none	none	none
3HSAR000039397_CR000255761 4148	atagt [54,58]/atagt [209,213]/gtagt [520,524]/atagt [664,668]/atagt [857,861]/gtagt [1502,1506]/gtagt [2583,2587]/atagt [2921,2925]/gtagt [3693,3697]/atagt [3789,3793]/atagt [3974,3978]/atagt [4089,4093]	ttttat [58,63]/ttttat [81,86]/ttttat [334,339]/ttttat [369,374]/ttttat [1917,1922]/ttttat [2230,2235]/ttttat [3026,3031]/ttttat [3427,3432]/ttttat [3850,3855]/ttttaat [3965,3971]/ttttaat [4118,4124]	tgtacata [3,10]/tgtaaata [1718,1725]	tttatct [335,341]/attgtct [3255,3261]/tttatct [3855,3861]
3HSAR000047538_CR000713929 1118	gtagt [887,891]	ttttat [515,520]/ttttat [646,651]/ttttaaat [801,808]	none	attatct [484,490]
3HSAR000000549_CR000003448 384	none	ttttaat [314,320]/ttttcat [343,349]	tgtatata [293,300]	none
3HSAR000053345_CR000766530 541	gtag [360,363]	none	none	none
3HSAR000015435_CR000094267 2017	gtagt [965,969]/atagt [1923,1927]/gtag [1945,1948]	none	none	tttgtct [946,952]/tttatct [1436,1442]
3HSAR000028143_CR000172147 1849	gtagt [783,787]/atagt [1792,1796]	none	none	none
3HSAR000019905_CR000121781 2801	atagt [637,641]/gtagt [892,896]/atagt [1343,1347]/gtagt [1390,1394]/gtagt [1406,1410]/gtagt [1617,1621]/atagt [1921,1925]/gtagt [2601,2605]	ttttat [772,777]/ttttat [1574,1579]/ttttat [2790,2795]	tgtatata [2648,2655]	attatct [2125,2131]
3HSAR000045771_CR000629371 1810	gtagt [160,164]/atagt [517,521]/atagt [879,883]/atagt [1758,1762]	ttttat [1029,1034]/ttttat [1310,1315]/ttttat [1453,1458]	none	tttgtct [609,615]
3HSAR000058339_CR001261072 156	none	none	none	none
3HSAR000062267_CR001391946 278	atagt [37,41]/atttagt [56,62]	none	none	none
3HSAR000049072_CR000725753 1284	gtagt [393,397]/atagt [980,984]/gttagt [1104,1109]	ttttat [688,693]	tgtacata [516,523]/tgtaaata [630,637]/tgtagata [783,790]	none
3HSAR000029430_CR000179940 329	gtag [269,272]	none	none	none
3HSAR000008502_CR000052178 444	atagt [251,255]	none	none	none
3HSAR000029020_CR000177456 1264	gtag [504,507]/gtag [534,537]/gtag [861,864]	none	none	none
3HSAR000012201_CR000074333 528	atagt [38,42]/atagt [396,400]	ttttaat [411,417]/ttttaagt [471,478]	tgtaaata [189,196]/tgtaaata [495,502]	none
3HSAR000014025_CR000085556 593	atagt [46,50]/atagt [240,244]/atagt [370,374]/gtagt [497,501]	ttttat [422,427]/ttttat [533,538]/ttttaaat [540,547]	none	none
3HSAR000052618_CR000751608 284	gtagt [147,151]	none	none	none
3HSAR000066972_CR001717188 3142	gtagt [183,187]/atagt [2252,2256]/gtagt [2324,2328]/atagt [2454,2458]/atagt [2851,2855]/atagt [2939,2943]/gtagt [2977,2981]	ttttat [664,669]/ttttat [1464,1469]/ttttat [2458,2463]/ttttat [2950,2955]/ttttact [3070,3076]	tgtatata [1289,1296]	none
3HSAR000056509_CR001227355 109	none	none	none	none
3HSAR000005943_CR000036962 543	none	none	none	attgtct [157,163]
3HSAR000039438_CR000256057 1852	attagt [1606,1611]	ttttat [15,20]/ttttat [347,352]/ttttat [667,672]/ttttat [917,922]/ttttat [1207,1212]/ttttat [1353,1358]/ttttat [1360,1365]/ttttat [1394,1399]/ttttat [1646,1651]	none	tttatct [1354,1360]/attgtct [1586,1592]
3HSAR000026254_CR000160667 1482	atttagt [66,72]/gtttagt [409,415]/gtttagt [1225,1231]	ttttat [1282,1287]	none	none
3HSAR000053447_CR000773165 2461	atagt [652,656]/gtag [2097,2100]	ttttat [464,469]/ttttat [674,679]/ttttat [1119,1124]/ttttat [1140,1145]/ttttaagt [1426,1433]	none	attatct [644,650]
3HSAR000032531_CR000199048 175	none	none	none	none
3HSAR000012789_CR000077901 8734	gtagt [1514,1518]/gtagt [2270,2274]/atagt [2751,2755]/gtagt [2889,2893]/atagt [3115,3119]/atagt [3196,3200]/gtagt [3478,3482]/atagt [4222,4226]/gtagt [4495,4499]/atagt [5208,5212]/atagt [6055,6059]/gtagt [6295,6299]/gtagt [7116,7120]/atagt [7324,7328]/atagt [7571,7575]/atagt [8003,8007]/gtagt [8540,8544]/atagt [8594,8598]	ttttat [738,743]/ttttat [1078,1083]/ttttat [1140,1145]/ttttat [2394,2399]/ttttat [2997,3002]/ttttat [3053,3058]/ttttat [3140,3145]/ttttat [4700,4705]/ttttat [6109,6114]/ttttat [7545,7550]/ttttat [8019,8024]/ttttat [8044,8049]/ttttaat [8358,8364]/ttttaat [8702,8708]	tgtatata [3520,3527]/tgtatata [3619,3626]/tgtagata [7799,7806]/tgtaaata [8647,8654]	tttatct [2998,3004]/tttatct [3421,3427]/tttatct [4633,4639]/attgtct [5230,5236]/tttgtct [5545,5551]/attatct [7538,7544]/attatct [7731,7737]/attgtct [8687,8693]
3HSAR000043199_CR000597465 3187	gtagt [302,306]/gtagt [2447,2451]/atagt [2606,2610]/atagt [2920,2924]	ttttat [2577,2582]/ttttat [3079,3084]	tgtatata [2261,2268]/tgtacata [2738,2745]	none
3HSAR000055553_CR000800051 1665	gtag [1313,1316]	ttttat [1655,1660]	none	none
3HSAR000065624_CR001630310 431	none	none	none	none
3HSAR000017676_CR000108180 2688	atagt [386,390]/atttagt [1336,1342]/gtag [1414,1417]/gtag [1717,1720]/gtag [1728,1731]/gtag [2214,2217]/gtag [2318,2321]/gtag [2637,2640]	ttttat [273,278]/ttttat [1828,1833]/ttttat [1911,1916]/ttttat [2456,2461]/ttttaat [2557,2563]	none	tttgtct [1153,1159]/tttatct [1912,1918]
3HSAR000019964_CR000122149 81	none	none	none	none
3HSAR000037850_CR000244490 4205	gtagt [869,873]/atagt [1521,1525]/atagt [1835,1839]/gtagt [1899,1903]/atagt [1943,1947]/atagt [2172,2176]/gtagt [3402,3406]/atagt [3672,3676]/atagt [3710,3714]/atagt [3957,3961]	ttttat [3515,3520]/ttttat [3653,3658]/ttttat [4093,4098]	tgtaaata [846,853]/tgtatata [3504,3511]/tgtaaata [3705,3712]	tttgtct [142,148]/attatct [1111,1117]/attatct [1543,1549]
3HSAR000029228_CR000178723 753	gtag [54,57]/gtag [185,188]/gtag [252,255]/gtag [401,404]	ttttat [147,152]/ttttat [486,491]/ttttat [743,748]	tgtatata [121,128]	none
3HSAR000007687_CR000047552 816	gttagt [604,609]	ttttat [783,788]	none	none
3HSAR000061238_CR001384616 33	none	none	none	none
3HSAR000010337_CR000063193 103	none	none	none	none
3HSAR000029392_CR000179710 2311	atagt [935,939]/atagt [1712,1716]	none	none	attatct [1086,1092]
3HSAR000010326_CR000063129 860	gtag [554,557]/gtag [603,606]/gtag [708,711]	ttttaat [810,816]	none	none
3HSAR000025709_CR000157330 105	none	none	none	none
3HSAR000031479_CR000192441 744	gtag [32,35]	none	none	attatct [446,452]
3HSAR000065596_CR001630152 1418	gtagt [1223,1227]	ttttat [1325,1330]	none	tttgtct [774,780]/attgtct [1343,1349]
3HSAR000031518_CR000192682 1518	atagt [75,79]/atagt [833,837]/gtag [909,912]	ttttat [1316,1321]/ttttaat [1461,1467]/ttttaat [1484,1490]	none	none
3HSAR000045746_CR000629192 3013	gtagt [1415,1419]/gtagt [1947,1951]/atagt [2597,2601]/gtagt [2837,2841]/atagt [2915,2919]	ttttat [755,760]/ttttat [798,803]/ttttat [1474,1479]/ttttat [2563,2568]/ttttat [2742,2747]	none	attatct [873,879]
3HSAR000038121_CR000246394 626	gtagt [586,590]	ttttaaat [569,576]	tgtacata [80,87]	none
3HSAR000052380_CR000749867 1330	gtag [399,402]/gtag [1010,1013]	ttttat [297,302]/ttttat [1267,1272]/ttttaat [1279,1285]	none	attatct [187,193]/attgtct [840,846]/tttatct [891,897]
3HSAR000023179_CR000141879 867	gtagt [701,705]	ttttat [592,597]	none	none
3HSAR000053075_CR000754927 192	none	none	none	none
3HSAR000013887_CR000084707 241	none	none	none	attgtct [182,188]
3HSAR000018097_CR000110763 129	none	ttttat [73,78]	none	none
3HSAR000030956_CR000189317 201	gtag [148,151]	ttttat [103,108]	none	none
3HSAR000050544_CR000736664 778	gtag [550,553]	ttttat [66,71]/ttttact [478,484]	none	none
3HSAR000045676_CR000628671 1922	atagt [123,127]/gtagt [1500,1504]/atagt [1792,1796]/atagt [1826,1830]	ttttat [1427,1432]	none	tttatct [679,685]
3HSAR000034068_CR000211738 4122	atagt [665,669]/gtagt [2128,2132]/atagt [2166,2170]/gtagt [3211,3215]/gtagt [3321,3325]/gtag [3589,3592]/gtag [4043,4046]	ttttat [503,508]/ttttat [582,587]/ttttat [2429,2434]/ttttat [4109,4114]	none	none
3HSAR000015652_CR000095612 1206	atagt [646,650]/atagt [692,696]/gtag [934,937]/gtag [1042,1045]/gtag [1137,1140]	ttttat [431,436]/ttttcat [1119,1125]	none	none
3HSAR000044388_CR000606422 3263	atagt [2194,2198]/gtagt [2264,2268]/atagt [2283,2287]/atagt [3094,3098]	ttttat [1801,1806]/ttttat [3103,3108]	none	tttgtct [866,872]/attgtct [2069,2075]/tttgtct [2112,2118]/tttgtct [2567,2573]/attatct [2819,2825]/tttgtct [3187,3193]
3HSAR000033729_CR000209148 3572	atagt [1194,1198]/atagt [1675,1679]/atagt [1903,1907]/atagt [1932,1936]/atagt [3122,3126]/atagt [3483,3487]	ttttat [132,137]/ttttat [263,268]/ttttat [599,604]/ttttat [898,903]/ttttat [1188,1193]/ttttat [3219,3224]/ttttat [3322,3327]/ttttat [3341,3346]/ttttcat [3373,3379]	tgtaaata [2736,2743]	tttgtct [240,246]
3HSAR000005600_CR000034876 671	gtagt [52,56]	none	none	none
3HSAR000044732_CR000609176 121	none	none	none	none
3HSAR000016591_CR000101460 400	none	none	none	none
3HSAR000052582_CR000751338 207	none	none	none	none
3HSAR000004663_CR000029114 268	none	none	none	none
3HSAR000057011_CR001251332 2328	atagt [895,899]/atagt [1465,1469]/gtagt [1705,1709]/gtagt [1820,1824]/atagt [2027,2031]	ttttat [322,327]/ttttaat [1518,1524]/ttttaagt [1588,1595]/ttttact [1753,1759]	tgtatata [99,106]/tgtatata [139,146]/tgtatata [167,174]	tttgtct [10,16]
3HSAR000006438_CR000040035 161	none	none	none	none
3HSAR000031203_CR000190768 138	none	none	none	none
3HSAR000004846_CR000030229 1939	atagt [139,143]/gtagt [238,242]/gtagt [341,345]/gtagt [394,398]/atagt [1199,1203]/atagt [1303,1307]/gtagt [1532,1536]/gtag [1793,1796]	ttttat [270,275]/ttttcat [304,310]	none	tttatct [271,277]/tttgtct [286,292]
3HSAR000044859_CR000617642 26	none	none	none	none
3HSAR000024918_CR000152475 186	none	none	none	none
3HSAR000005110_CR000031868 105	atagt [87,91]	ttttat [34,39]	none	none
3HSAR000011320_CR000069025 2371	gttagt [401,406]/gtag [409,412]	none	none	tttatct [1767,1773]/attgtct [2278,2284]
3HSAR000035256_CR000221351 1034	gtagt [345,349]/atagt [351,355]/atagt [396,400]/atagt [620,624]/gtagt [830,834]/gtag [890,893]/gtag [935,938]	ttttat [380,385]/ttttat [948,953]	none	tttgtct [99,105]
3HSAR000012255_CR000074656 1658	atagt [96,100]/gtagt [122,126]/gtagt [663,667]/gtag [1039,1042]/gtag [1142,1145]/gtag [1304,1307]	ttttaat [741,747]	none	tttatct [1535,1541]
3HSAR000039671_CR000257887 374	gtag [109,112]/gtag [318,321]	ttttact [48,54]/ttttact [359,365]	none	attgtct [118,124]
3HSAR000039163_CR000253974 350	gttagt [157,162]	ttttcat [19,25]	none	none
3HSAR000004231_CR000026483 763	atagt [23,27]	ttttaat [414,420]	none	tttatct [311,317]
3HSAR000012657_CR000077102 1285	atagt [573,577]/gtag [708,711]/gtag [782,785]/gtag [949,952]/gtag [1111,1114]	ttttat [671,676]/ttttact [954,960]	none	none
3HSAR000034725_CR000217263 254	gtag [136,139]	ttttat [173,178]	none	none
3HSAR000015882_CR000097038 455	gtagt [56,60]/atagt [326,330]	none	none	tttgtct [365,371]
3HSAR000061926_CR001389501 791	atagt [465,469]/atagt [743,747]	none	none	attatct [411,417]
3HSAR000030472_CR000186385 1025	atagt [148,152]/gtagt [400,404]/gtag [407,410]	ttttat [943,948]/ttttcat [966,972]	tgtagata [352,359]	attatct [544,550]
3HSAR000061681_CR001387744 1429	atagt [591,595]/gtagt [605,609]/atagt [722,726]/gtagt [951,955]/atagt [1130,1134]/gtag [1221,1224]/gtag [1279,1282]/gtag [1283,1286]	ttttat [877,882]/ttttat [955,960]/ttttaagt [1289,1296]	none	none
3HSAR000029178_CR000178421 272	atagt [18,22]/gtag [125,128]	none	none	none
3HSAR000010288_CR000062909 340	gtttagt [265,271]	ttttaaat [29,36]	none	none
3HSAR000002231_CR000013967 3542	gtagt [1296,1300]/atagt [2210,2214]/atagt [2604,2608]/gtag [3033,3036]/gtag [3152,3155]/gtag [3161,3164]	ttttat [1107,1112]/ttttat [1260,1265]/ttttat [1497,1502]/ttttat [1617,1622]/ttttat [2129,2134]/ttttact [2729,2735]	tgtatata [1246,1253]	tttatct [1618,1624]/tttgtct [3426,3432]
3HSAR000054200_CR000789035 4261	atagt [48,52]/atagt [501,505]/atagt [939,943]/atagt [1041,1045]/atagt [1340,1344]/gtagt [1719,1723]/atagt [2214,2218]/atagt [2301,2305]/gtagt [2508,2512]/atagt [2777,2781]/atagt [3241,3245]/gtagt [3350,3354]/atagt [3547,3551]/gtagt [3761,3765]/atagt [4185,4189]	ttttat [108,113]/ttttat [177,182]/ttttat [183,188]/ttttat [1900,1905]/ttttat [2065,2070]/ttttat [2283,2288]/ttttat [3074,3079]/ttttat [3305,3310]/ttttaat [3715,3721]/ttttaaat [4130,4137]/ttttcat [4247,4253]	tgtaaata [3046,3053]	tttatct [2807,2813]/tttatct [3075,3081]
3HSAR000029830_CR000182411 153	none	none	none	none
3HSAR000042432_CR000591648 1384	atagt [187,191]/atagt [208,212]/atagt [807,811]/atagt [941,945]/gtagt [1260,1264]/attagt [1293,1298]	ttttat [74,79]/ttttat [80,85]/ttttat [204,209]/ttttat [337,342]/ttttat [357,362]/ttttat [374,379]/ttttat [529,534]/ttttat [586,591]/ttttat [665,670]/ttttat [721,726]/ttttat [876,881]/ttttaat [1075,1081]	none	attgtct [756,762]/tttgtct [792,798]/tttatct [877,883]
3HSAR000058302_CR001260760 201	none	ttttat [133,138]	none	none
3HSAR000011890_CR000072469 22	none	none	none	none
3HSAR000005374_CR000033456 1647	atagt [63,67]/gtagt [817,821]/atagt [926,930]/gtagt [993,997]/gttagt [1586,1591]	ttttat [459,464]/ttttat [634,639]/ttttat [959,964]/ttttat [1232,1237]/ttttat [1302,1307]/ttttat [1504,1509]	tgtatata [938,945]/tgtaaata [972,979]	tttatct [1124,1130]
3HSAR000036447_CR000234473 852	gtagt [140,144]/gtag [246,249]/gtag [582,585]	none	none	none
3HSAR000062484_CR001393465 335	none	none	none	none
3HSAR000040749_CR000373445 778	attagt [280,285]/atttagt [384,390]/gtag [646,649]	ttttat [104,109]/ttttat [762,767]	none	tttatct [763,769]
3HSAR000032101_CR000196236 42	none	none	none	none
3HSAR000039498_CR000256534 2265	atagt [403,407]/gtagt [417,421]/gtagt [1355,1359]/atagt [1630,1634]/gtagt [1823,1827]/gtag [1860,1863]/gtag [2232,2235]	ttttat [80,85]/ttttat [164,169]/ttttat [937,942]/ttttat [1271,1276]/ttttat [1634,1639]/ttttact [1892,1898]	none	none
3HSAR000043362_CR000598702 313	gtag [29,32]	ttttat [229,234]	none	none
3HSAR000024616_CR000150616 241	none	none	tgtatata [213,220]	none
3HSAR000016341_CR000099903 294	gtag [1,4]	none	none	none
3HSAR000025923_CR000158645 1833	gtagt [437,441]/gtagt [554,558]/gtagt [957,961]/attagt [1787,1792]	ttttat [107,112]	none	tttgtct [1499,1505]
3HSAR000005961_CR000037075 543	none	none	none	attgtct [157,163]
3HSAR000004688_CR000029265 4817	atagt [32,36]/atagt [977,981]/gtagt [1343,1347]/gtagt [1604,1608]/atagt [2113,2117]/gtagt [2282,2286]/gtagt [2587,2591]/gtagt [2820,2824]/atagt [3064,3068]/atagt [3177,3181]/gtagt [3539,3543]/gtag [3577,3580]	ttttat [238,243]/ttttat [2682,2687]/ttttat [2833,2838]/ttttat [2856,2861]/ttttat [2980,2985]/ttttat [3435,3440]/ttttat [3548,3553]/ttttat [3556,3561]/ttttat [3606,3611]/ttttat [4515,4520]/ttttaat [4742,4748]/ttttaat [4750,4756]	none	attatct [50,56]/attgtct [2716,2722]/tttatct [3549,3555]/tttatct [3607,3613]
3HSAR000033875_CR000210268 2627	gtag [337,340]/gtag [1521,1524]/gtag [2001,2004]/gtag [2231,2234]/gtag [2251,2254]/gtag [2466,2469]	ttttat [1750,1755]/ttttat [1806,1811]	none	none
3HSAR000046269_CR000633609 2222	gtagt [1493,1497]/gtag [1600,1603]	ttttcat [719,725]/ttttcat [1001,1007]	none	none
3HSAR000036540_CR000235129 175	none	none	none	none
3HSAR000056661_CR001228331 959	atagt [219,223]/atttagt [716,722]	ttttat [805,810]	none	none
3HSAR000003978_CR000024940 612	gtagt [145,149]/gtag [514,517]	ttttat [494,499]	none	none
3HSAR000000397_CR000002417 409	gttagt [323,328]	none	none	none
3HSAR000037484_CR000241928 157	none	none	none	none
3HSAR000052570_CR000751256 44	none	none	none	none
3HSAR000063482_CR001400581 395	gtag [303,306]	none	none	none
3HSAR000018626_CR000114027 97	none	none	none	none
3HSAR000014187_CR000086560 181	none	none	none	none
3HSAR000060194_CR001377784 1770	atagt [152,156]/atagt [504,508]/atagt [933,937]/gtagt [1713,1717]/gtag [1756,1759]	ttttat [696,701]/ttttat [1732,1737]	none	tttgtct [645,651]
3HSAR000024078_CR000147346 2768	gtag [277,280]/gtag [773,776]/gtag [1081,1084]/gtag [1347,1350]/gtag [1639,1642]/gtag [1761,1764]	ttttat [2589,2594]	none	none
3HSAR000047334_CR000641092 391	none	ttttat [60,65]/ttttat [280,285]	none	none
3HSAR000059243_CR001371828 1915	atagt [144,148]/gtagt [800,804]/atttagt [807,813]/atttagt [1785,1791]	ttttat [1328,1333]/ttttat [1381,1386]/ttttat [1494,1499]/ttttat [1514,1519]/ttttat [1529,1534]/ttttat [1884,1889]	tgtaaata [97,104]	tttatct [1382,1388]
3HSAR000029679_CR000181471 223	gtag [38,41]	none	none	none
3HSAR000041128_CR000532204 1840	atagt [860,864]/gtagt [962,966]/gtag [1078,1081]	ttttact [655,661]/ttttcat [814,820]	none	tttgtct [788,794]
3HSAR000027976_CR000171122 616	gtagt [493,497]	none	none	none
3HSAR000028898_CR000176710 2854	atagt [744,748]/atagt [1220,1224]/gtagt [1331,1335]/gtagt [1341,1345]/gtagt [1390,1394]/atagt [1550,1554]/gtagt [1638,1642]/gtagt [1952,1956]/atagt [2454,2458]	ttttat [312,317]/ttttat [2510,2515]/ttttat [2533,2538]	none	tttgtct [7,13]/tttgtct [43,49]/attatct [904,910]
3HSAR000026541_CR000162418 2568	gttagt [1856,1861]	ttttat [2509,2514]	none	tttgtct [165,171]
3HSAR000037989_CR000245463 111	none	none	none	none
3HSAR000036936_CR000238014 393	gtag [231,234]/gtag [315,318]/gtag [368,371]	none	none	none
3HSAR000038948_CR000252384 76	none	none	none	none
3HSAR000017332_CR000106063 6749	gtagt [1000,1004]/gtagt [1833,1837]/gtagt [3030,3034]/gtagt [4836,4840]/gtagt [6126,6130]	ttttat [26,31]/ttttat [774,779]/ttttat [1106,1111]/ttttat [1533,1538]/ttttat [1976,1981]/ttttat [6237,6242]/ttttat [6667,6672]	tgtaaata [6491,6498]	tttatct [6668,6674]
3HSAR000065291_CR001625628 1418	gtagt [1295,1299]	none	none	none
3HSAR000046837_CR000637506 649	atagt [134,138]/gtag [563,566]/gtag [626,629]	ttttat [158,163]/ttttat [382,387]/ttttcat [497,503]	none	none
3HSAR000001891_CR000011752 197	none	none	none	none
3HSAR000015580_CR000095183 2949	atagt [72,76]/atagt [2505,2509]	ttttat [2626,2631]/ttttaaat [2648,2655]/ttttaagt [2704,2711]	tgtatata [104,111]/tgtacata [2410,2417]	tttatct [515,521]
3HSAR000022417_CR000137239 755	gtag [558,561]	ttttact [740,746]	none	none
3HSAR000025394_CR000155394 101	none	none	none	none
3HSAR000032739_CR000200358 315	none	ttttat [74,79]	none	none
3HSAR000035307_CR000224821 4424	gtagt [1081,1085]/gtagt [1633,1637]/gtagt [1866,1870]/atagt [2521,2525]/gtagt [3637,3641]/gtag [3661,3664]/gtag [3698,3701]/gtag [4225,4228]	ttttat [1284,1289]/ttttact [2810,2816]	tgtaaata [3885,3892]	tttatct [1298,1304]/attgtct [1933,1939]
3HSAR000007750_CR000047941 1855	atagt [620,624]/atagt [732,736]/gtagt [1273,1277]/gtagt [1355,1359]/gtag [1466,1469]/gtag [1847,1850]	ttttat [64,69]/ttttat [711,716]/ttttat [1396,1401]	none	none
3HSAR000009900_CR000060575 3166	atagt [1765,1769]/atagt [3158,3162]	ttttat [154,159]/ttttat [2658,2663]/ttttat [2989,2994]	tgtacata [3153,3160]	none
3HSAR000035902_CR000230507 264	none	none	none	none
3HSAR000056059_CR001224137 4058	gtagt [375,379]/atagt [755,759]/atagt [831,835]/atagt [863,867]/atagt [903,907]/atagt [1207,1211]/atagt [1217,1221]/atagt [2243,2247]/atagt [2825,2829]/atagt [3566,3570]	ttttat [805,810]/ttttat [827,832]/ttttat [1831,1836]/ttttat [2166,2171]/ttttat [2443,2448]/ttttat [2962,2967]/ttttaat [3427,3433]/ttttact [3939,3945]	none	tttgtct [799,805]/tttgtct [943,949]/attgtct [3754,3760]
3HSAR000034235_CR000213067 3441	atagt [464,468]/atagt [1287,1291]/gtagt [1386,1390]/gtagt [2117,2121]/gtagt [2879,2883]/atagt [3267,3271]	ttttat [386,391]/ttttat [1073,1078]/ttttat [3193,3198]	tgtacata [2284,2291]	none
3HSAR000051136_CR000740794 425	gtag [331,334]	none	none	none
3HSAR000012733_CR000077556 1003	gtagt [637,641]/gtag [799,802]/gtag [862,865]	ttttat [497,502]/ttttaaat [584,591]	none	none
3HSAR000031666_CR000193599 187	gtag [111,114]	none	none	attgtct [32,38]
3HSAR000003450_CR000021723 1699	atagt [1692,1696]	ttttat [380,385]	none	attgtct [1669,1675]
3HSAR000057222_CR001252741 1120	gttagt [291,296]	ttttat [857,862]	none	none
3HSAR000018078_CR000110651 1196	gtagt [375,379]/gtagt [465,469]/atagt [811,815]/gtag [892,895]/gtag [945,948]/gtag [1084,1087]	ttttat [241,246]/ttttat [802,807]/ttttat [830,835]/ttttat [842,847]/ttttat [1078,1083]	tgtaaata [936,943]	tttatct [831,837]/attgtct [1108,1114]
3HSAR000053248_CR000758159 3415	gtagt [336,340]/gtagt [925,929]/gtagt [1438,1442]/gtagt [3295,3299]	ttttat [223,228]/ttttat [982,987]/ttttat [2186,2191]/ttttat [2223,2228]/ttttat [2685,2690]	none	none
3HSAR000021154_CR000129566 409	gtag [79,82]	none	none	none
3HSAR000027102_CR000165856 446	gtag [300,303]	ttttat [389,394]/ttttat [395,400]	none	none
3HSAR000007062_CR000043840 1176	attagt [373,378]/attagt [452,457]/attagt [662,667]/gtag [1083,1086]	ttttat [31,36]/ttttat [86,91]/ttttat [106,111]/ttttat [124,129]/ttttat [1023,1028]	tgtagata [427,434]	attatct [495,501]
3HSAR000007842_CR000048466 18	none	none	none	none
3HSAR000029087_CR000177873 5	none	none	none	none
3HSAR000023487_CR000143741 972	atagt [878,882]	ttttat [780,785]	none	none
3HSAR000054439_CR000791371 335	atagt [271,275]	ttttat [277,282]/ttttcat [285,291]	none	none
3HSAR000005136_CR000032026 4574	atagt [382,386]/atagt [524,528]/atagt [740,744]/gtagt [1715,1719]/gtagt [2024,2028]/atagt [2063,2067]/atagt [2481,2485]/atagt [2671,2675]/atagt [3169,3173]/atagt [4522,4526]	ttttat [463,468]/ttttat [570,575]/ttttat [946,951]/ttttat [2752,2757]/ttttat [3332,3337]/ttttact [3854,3860]	tgtaaata [4546,4553]	attatct [1320,1326]/tttgtct [1533,1539]/tttgtct [2137,2143]/tttgtct [2413,2419]/tttgtct [3008,3014]/tttatct [3608,3614]
3HSAR000002042_CR000012732 1990	atagt [338,342]/gtagt [893,897]/atagt [1595,1599]	ttttat [702,707]/ttttat [1459,1464]/ttttat [1769,1774]/ttttaagt [1922,1929]	tgtaaata [1980,1987]	none
3HSAR000025046_CR000153266 19	none	none	none	none
3HSAR000030122_CR000184210 153	none	none	none	none
3HSAR000010135_CR000061986 139	none	none	none	none
3HSAR000064981_CR001411462 2359	atagt [915,919]/gtagt [1109,1113]/atagt [1519,1523]	ttttat [911,916]/ttttat [943,948]/ttttat [1506,1511]	none	none
3HSAR000048354_CR000720228 30	none	none	none	none
3HSAR000006222_CR000038694 318	gtag [129,132]/gtag [215,218]	ttttat [116,121]/ttttat [164,169]/ttttaat [251,257]	none	tttgtct [49,55]
3HSAR000011400_CR000069501 2884	atagt [1082,1086]/atagt [1670,1674]/gtagt [2131,2135]/gtag [2409,2412]/gtag [2637,2640]	ttttat [2296,2301]	tgtacata [2767,2774]	tttgtct [2559,2565]
3HSAR000042728_CR000593936 424	none	none	none	none
3HSAR000065512_CR001629672 2044	gtagt [635,639]/gtagt [992,996]/atagt [1234,1238]/gtagt [1535,1539]/gtagt [1789,1793]/gtag [1995,1998]	ttttat [569,574]/ttttat [1672,1677]/ttttat [1912,1917]/ttttaat [1937,1943]	tgtatata [1158,1165]	none
3HSAR000012834_CR000078173 565	atagt [68,72]/attagt [303,308]/gtag [395,398]/gtag [422,425]/gtag [483,486]	ttttat [170,175]/ttttat [518,523]/ttttcat [536,542]	none	tttgtct [193,199]
3HSAR000012210_CR000074389 141	none	none	none	none
3HSAR000016652_CR000101841 2285	atagt [222,226]/gttagt [824,829]/gtag [1293,1296]/gtag [1822,1825]/gtag [2169,2172]	ttttat [1105,1110]/ttttaat [1136,1142]	none	none
3HSAR000001183_CR000007340 498	atagt [223,227]/atagt [318,322]/atagt [405,409]	ttttat [368,373]	none	none
3HSAR000018897_CR000115686 2087	atagt [491,495]/atagt [514,518]/atagt [1313,1317]/atagt [1708,1712]	ttttat [1723,1728]/ttttat [1966,1971]	none	tttgtct [234,240]/attatct [1876,1882]
3HSAR000037137_CR000239453 426	none	none	none	tttgtct [139,145]
3HSAR000023904_CR000146283 142	none	none	none	none
3HSAR000020960_CR000128351 712	gtag [254,257]/gtag [284,287]	none	none	tttatct [694,700]
3HSAR000049893_CR000731833 94	none	ttttaat [49,55]	none	none
3HSAR000055779_CR001047298 4648	atagt [341,345]/gtagt [451,455]/gtagt [2141,2145]/atttagt [3480,3486]/gtag [3754,3757]/gtag [3954,3957]	ttttat [2253,2258]/ttttat [2698,2703]/ttttat [3592,3597]/ttttat [4086,4091]/ttttcat [4096,4102]	tgtatata [2727,2734]	attatct [3000,3006]
3HSAR000040951_CR000374951 170	none	none	none	none
3HSAR000049912_CR000731979 764	gtag [238,241]	none	none	none
3HSAR000051184_CR000741173 467	none	ttttat [377,382]	none	attatct [431,437]
3HSAR000032670_CR000199925 475	none	none	none	none
3HSAR000037964_CR000245288 5393	atagt [643,647]/gtagt [981,985]/gtagt [2400,2404]/gtagt [4739,4743]/atttagt [5249,5255]	ttttat [1157,1162]/ttttat [1757,1762]/ttttat [1855,1860]/ttttat [2507,2512]/ttttat [3455,3460]/ttttat [4084,4089]/ttttat [4441,4446]/ttttat [5322,5327]	tgtagata [1448,1455]	attatct [1492,1498]/tttgtct [2442,2448]
3HSAR000058065_CR001258988 4389	atagt [3872,3876]/gtagt [4006,4010]/atagt [4357,4361]	none	none	tttgtct [1808,1814]
3HSAR000017151_CR000104937 1023	gtagt [4,8]/gtagt [260,264]/gtagt [407,411]/atagt [576,580]/atagt [637,641]/attagt [899,904]	none	tgtaaata [674,681]	none
3HSAR000021084_CR000129128 848	gtagt [509,513]/gtag [760,763]/gtag [798,801]	ttttat [686,691]/ttttat [748,753]	none	none
3HSAR000028347_CR000173386 1723	atagt [649,653]/gtagt [1443,1447]	ttttat [1310,1315]/ttttat [1320,1325]	tgtatata [1129,1136]	tttgtct [745,751]
3HSAR000016572_CR000101339 164	none	none	tgtacata [128,135]	none
3HSAR000028789_CR000176061 754	atagt [135,139]/atagt [642,646]	ttttat [211,216]/ttttat [646,651]	none	none
3HSAR000044601_CR000608141 106	none	ttttat [5,10]	none	none
3HSAR000047008_CR000638766 201	gtagt [193,197]	ttttcat [61,67]	none	none
3HSAR000011280_CR000068787 2922	atagt [2855,2859]	ttttact [795,801]/ttttact [1010,1016]/ttttact [2789,2795]	none	tttgtct [2557,2563]
3HSAR000037472_CR000241845 3336	atagt [445,449]/gtagt [1720,1724]/atagt [2346,2350]/atagt [3013,3017]/attagt [3173,3178]	ttttat [2078,2083]/ttttat [2978,2983]/ttttat [3218,3223]	none	attatct [1246,1252]/tttgtct [1398,1404]
3HSAR000006871_CR000042663 428	gtag [116,119]	none	none	none
3HSAR000031842_CR000194662 69	none	none	none	none
3HSAR000025818_CR000158005 304	none	none	none	none
3HSAR000021242_CR000130114 3492	gtagt [1433,1437]/gtagt [3236,3240]	none	tgtaaata [3299,3306]	none
3HSAR000020866_CR000127759 736	gtttagt [483,489]/gtag [701,704]	ttttat [373,378]/ttttaat [625,631]	none	none
3HSAR000059495_CR001373574 1896	atagt [596,600]/gtag [762,765]/gtag [815,818]/gtag [1044,1047]/gtag [1178,1181]/gtag [1215,1218]/gtag [1679,1682]	ttttat [339,344]/ttttat [363,368]/ttttat [569,574]/ttttat [1696,1701]	none	tttatct [1742,1748]
3HSAR000012366_CR000075327 3995	atagt [2288,2292]/atagt [2588,2592]/attagt [3896,3901]	ttttat [549,554]/ttttat [1886,1891]/ttttat [3986,3991]	none	tttgtct [2049,2055]
3HSAR000006342_CR000039459 847	gtagt [192,196]/gtag [208,211]/gtag [251,254]/gtag [778,781]	ttttat [127,132]/ttttat [228,233]/ttttat [235,240]/ttttat [723,728]	tgtatata [608,615]	tttatct [236,242]/tttatct [724,730]
3HSAR000056877_CR001250370 2527	atagt [303,307]/atagt [520,524]/gtagt [654,658]/atagt [882,886]/gtagt [1089,1093]/gtagt [1361,1365]/gtagt [1371,1375]/atagt [1759,1763]/gtagt [2122,2126]/atagt [2198,2202]	ttttat [413,418]/ttttat [768,773]/ttttat [1077,1082]/ttttat [1625,1630]/ttttat [1962,1967]/ttttat [2172,2177]/ttttat [2438,2443]/ttttaat [2490,2496]	tgtaaata [627,634]/tgtagata [1571,1578]	tttatct [769,775]/attgtct [1629,1635]/tttatct [2173,2179]/attgtct [2400,2406]
3HSAR000022473_CR000137584 820	gtagt [182,186]/gtagt [626,630]/atagt [641,645]	ttttat [604,609]	none	none
3HSAR000028376_CR000173564 705	gtag [633,636]	ttttat [498,503]	none	tttgtct [539,545]
3HSAR000017160_CR000104995 714	gtag [87,90]/gtag [294,297]	ttttaaat [646,653]	none	none
3HSAR000064529_CR001408068 176	gtag [137,140]	none	none	none
3HSAR000053709_CR000784152 1584	gtagt [991,995]/gtagt [1018,1022]/gtagt [1277,1281]/gtag [1554,1557]	ttttat [1208,1213]/ttttact [1222,1228]	none	none
3HSAR000039759_CR000258538 1036	atagt [848,852]/gtag [1004,1007]	ttttat [844,849]/ttttat [886,891]	none	tttatct [181,187]
3HSAR000058856_CR001369134 1627	atagt [833,837]/gtag [909,912]	ttttat [1316,1321]/ttttaat [1461,1467]/ttttaat [1484,1490]	none	none
3HSAR000023929_CR000146439 1144	atagt [618,622]/gtag [730,733]/gtag [1034,1037]	ttttat [788,793]/ttttact [1093,1099]	tgtaaata [590,597]/tgtatata [710,717]	none
3HSAR000037350_CR000240987 3393	atagt [268,272]/atagt [511,515]/atagt [1641,1645]/atagt [1975,1979]/atagt [2253,2257]/gtagt [2613,2617]/gtag [2960,2963]/gtag [3307,3310]	ttttat [139,144]/ttttat [1240,1245]/ttttat [1530,1535]/ttttat [2699,2704]/ttttat [3229,3234]/ttttat [3235,3240]	tgtaaata [2282,2289]/tgtagata [2452,2459]	tttgtct [1566,1572]
3HSAR000031070_CR000189993 1024	gtag [311,314]/gtag [364,367]	none	none	none
3HSAR000058155_CR001259647 3995	atagt [123,127]/atagt [1625,1629]/gtagt [2486,2490]/gtagt [2542,2546]/gtagt [3561,3565]	ttttat [47,52]/ttttat [619,624]/ttttat [874,879]/ttttat [1739,1744]/ttttat [2450,2455]/ttttat [2971,2976]/ttttaat [3554,3560]/ttttaat [3720,3726]/ttttact [3806,3812]	tgtaaata [3080,3087]	tttatct [356,362]/attgtct [514,520]/tttgtct [1182,1188]/attatct [2475,2481]
3HSAR000056977_CR001251121 1129	atagt [227,231]/atagt [235,239]/gtag [411,414]/gtag [846,849]/gtag [978,981]	ttttaat [257,263]/ttttact [1037,1043]	none	none
3HSAR000032238_CR000197077 75	gtagt [66,70]	none	none	none
3HSAR000010412_CR000063639 122	none	none	none	none
3HSAR000060211_CR001377890 1607	gtagt [940,944]/gtag [945,948]	none	none	none
3HSAR000054874_CR000794906 825	gtagt [555,559]/gtagt [782,786]	ttttat [645,650]	tgtatata [652,659]	none
3HSAR000062209_CR001391528 539	atagt [507,511]	ttttat [259,264]/ttttcat [273,279]	none	none
3HSAR000014811_CR000090406 1202	atagt [946,950]	ttttat [698,703]/ttttat [776,781]/ttttat [857,862]	none	attgtct [795,801]
3HSAR000058354_CR001261181 268	none	none	none	none
3HSAR000044837_CR000616062 492	gtagt [140,144]	none	none	none
3HSAR000006876_CR000042694 1675	gtagt [458,462]/atagt [1449,1453]	ttttat [423,428]/ttttat [598,603]/ttttact [879,885]	tgtaaata [1524,1531]	tttgtct [665,671]
3HSAR000000469_CR000002940 138	none	none	none	none
3HSAR000002760_CR000017365 947	atagt [356,360]/gtag [548,551]/gtag [785,788]	none	none	none
3HSAR000036877_CR000237604 5281	atagt [382,386]/atagt [504,508]/atagt [2009,2013]/atagt [2144,2148]/gtagt [3141,3145]/atagt [4024,4028]/gtagt [4103,4107]/gtagt [4478,4482]/gtagt [4716,4720]	ttttat [103,108]/ttttat [124,129]/ttttat [302,307]/ttttat [2663,2668]/ttttat [3492,3497]/ttttat [4399,4404]/ttttat [4599,4604]/ttttat [4698,4703]/ttttat [5055,5060]	tgtatata [1288,1295]	tttgtct [4593,4599]/tttatct [5056,5062]
3HSAR000031280_CR000191230 108	none	none	none	none
3HSAR000007127_CR000044224 83	none	ttttaaat [60,67]	none	none
3HSAR000020981_CR000128477 8	none	none	none	none
3HSAR000028666_CR000175318 2081	attagt [193,198]/gtag [222,225]/gtag [987,990]/gtag [1589,1592]/gtag [2052,2055]	ttttat [2070,2075]	tgtatata [2036,2043]	none
3HSAR000008035_CR000049504 1195	atagt [1114,1118]	ttttat [341,346]/ttttaat [788,794]/ttttaat [1049,1055]	tgtacata [1059,1066]	none
3HSAR000038874_CR000251870 510	none	ttttcat [35,41]	none	none
3HSAR000021933_CR000134334 1666	gtagt [579,583]/atagt [1645,1649]	none	tgtagata [746,753]	none
3HSAR000051892_CR000746186 305	atagt [240,244]/atagt [259,263]/atagt [272,276]	ttttat [10,15]/ttttat [82,87]	none	none
3HSAR000047191_CR000640088 636	none	ttttact [560,566]	none	tttgtct [506,512]
3HSAR000058384_CR001261403 227	none	none	none	none
3HSAR000057950_CR001258110 1831	gtagt [1405,1409]	ttttcat [775,781]	none	none
3HSAR000056030_CR001223925 916	gtagt [392,396]/atagt [590,594]/gtagt [770,774]/atagt [901,905]	ttttat [876,881]	none	none
3HSAR000022182_CR000135818 90	none	none	none	none
3HSAR000014404_CR000087916 2747	gtagt [2190,2194]/gtag [2255,2258]	ttttat [144,149]/ttttat [429,434]/ttttat [726,731]/ttttat [951,956]/ttttat [1054,1059]/ttttat [1509,1514]/ttttat [2453,2458]	tgtaaata [520,527]	tttgtct [1359,1365]/tttatct [1780,1786]
3HSAR000062330_CR001392389 325	none	ttttat [143,148]/ttttaaat [172,179]	none	none
3HSAR000047957_CR000717265 1259	atagt [226,230]/gtagt [465,469]/atagt [515,519]/atagt [634,638]/atagt [761,765]	ttttat [108,113]/ttttat [487,492]/ttttat [571,576]/ttttat [989,994]/ttttaat [1007,1013]	none	attgtct [231,237]/tttgtct [1050,1056]
3HSAR000010979_CR000067038 880	gttagt [176,181]/gtag [308,311]	ttttat [840,845]	tgtacata [811,818]	none
3HSAR000040108_CR000261168 216	none	ttttat [171,176]/ttttaaat [189,196]	none	none
3HSAR000057551_CR001255066 574	gtag [263,266]	ttttat [206,211]	none	none
3HSAR000015907_CR000097193 65	none	none	none	none
3HSAR000029484_CR000180268 1235	gtagt [1110,1114]	none	none	none
3HSAR000015121_CR000092300 50	atagt [16,20]	none	none	none
3HSAR000033086_CR000204228 244	atagt [102,106]	none	none	none
3HSAR000009489_CR000058116 413	gtag [6,9]	ttttcat [358,364]	none	none
3HSAR000012173_CR000074171 1907	gtagt [620,624]/atagt [799,803]/gtagt [1189,1193]/atagt [1786,1790]	ttttat [101,106]/ttttat [980,985]/ttttat [1030,1035]/ttttat [1489,1494]/ttttat [1631,1636]	tgtaaata [766,773]/tgtatata [1655,1662]	tttatct [1632,1638]
3HSAR000042873_CR000594991 121	none	none	none	none
3HSAR000019315_CR000118240 1403	atagt [1281,1285]/gtag [1311,1314]	ttttat [1083,1088]/ttttcat [1185,1191]	tgtacata [1276,1283]	none
3HSAR000028801_CR000176134 305	gtagt [152,156]/atagt [276,280]	ttttcat [27,33]	none	none
3HSAR000019804_CR000121154 2863	atagt [794,798]/atagt [886,890]/atagt [1393,1397]/gtagt [1901,1905]/gtagt [2016,2020]/atagt [2288,2292]	ttttat [820,825]/ttttat [935,940]/ttttat [1437,1442]/ttttat [1443,1448]/ttttat [1592,1597]/ttttat [1675,1680]	tgtacata [1556,1563]	attatct [2620,2626]
3HSAR000065222_CR001413244 699	none	ttttat [218,223]/ttttaat [560,566]	tgtaaata [142,149]	none
3HSAR000035660_CR000227494 1278	atagt [49,53]/atagt [1208,1212]	ttttat [372,377]/ttttat [464,469]/ttttat [494,499]/ttttat [963,968]/ttttat [1195,1200]	tgtagata [1015,1022]/tgtaaata [1176,1183]	tttgtct [1170,1176]
3HSAR000053189_CR000755764 2412	gtagt [811,815]/gtag [1379,1382]	ttttat [1112,1117]	tgtatata [1561,1568]/tgtaaata [2380,2387]	attatct [296,302]
3HSAR000024442_CR000149540 280	none	none	none	none
3HSAR000062752_CR001395428 305	none	none	none	attgtct [292,298]
3HSAR000015135_CR000092391 244	none	none	none	none
3HSAR000028691_CR000175470 175	gtag [131,134]	ttttcat [36,42]	none	none
3HSAR000008010_CR000049380 1927	atagt [61,65]/atagt [605,609]/gtagt [1855,1859]	ttttat [166,171]/ttttat [1186,1191]/ttttat [1282,1287]/ttttat [1529,1534]/ttttat [1562,1567]	tgtatata [985,992]	attgtct [1841,1847]
3HSAR000053090_CR000755037 6227	atagt [1822,1826]/atagt [3461,3465]/gtagt [4572,4576]/atagt [5392,5396]/atttagt [5511,5517]/gtag [5893,5896]/gtag [6093,6096]	ttttat [1196,1201]/ttttat [1395,1400]/ttttat [1699,1704]/ttttat [2131,2136]/ttttat [4157,4162]/ttttat [5346,5351]/ttttat [5660,5665]/ttttat [6126,6131]/ttttat [6141,6146]	tgtagata [1354,1361]/tgtaaata [5362,5369]/tgtacata [5387,5394]	attatct [2125,2131]/tttatct [4382,4388]
3HSAR000048882_CR000724339 1597	gtagt [1325,1329]/attagt [1470,1475]	ttttat [893,898]/ttttat [1438,1443]/ttttat [1445,1450]/ttttat [1459,1464]	tgtaaata [782,789]/tgtatata [1226,1233]	attgtct [1513,1519]
3HSAR000050889_CR000739137 294	gtag [1,4]	none	none	none
3HSAR000021927_CR000134299 636	none	ttttact [560,566]	none	tttgtct [506,512]
3HSAR000016914_CR000103474 3596	atagt [1644,1648]/gtagt [1657,1661]/atagt [1772,1776]/atagt [2607,2611]/attagt [2614,2619]/gtag [2931,2934]/gtag [3392,3395]/gtag [3405,3408]/gtag [3486,3489]/gtag [3533,3536]	ttttat [90,95]/ttttat [573,578]/ttttat [663,668]/ttttat [1164,1169]/ttttat [1810,1815]/ttttat [3522,3527]	tgtagata [2602,2609]	none
3HSAR000002026_CR000012625 33	atagt [3,7]	none	none	none
3HSAR000065626_CR001630320 731	none	none	none	none
3HSAR000054496_CR000792015 1111	atagt [1084,1088]	ttttaat [429,435]/ttttact [442,448]/ttttact [968,974]	none	attgtct [458,464]
3HSAR000055370_CR000798603 7151	atagt [299,303]/atagt [784,788]/atagt [1245,1249]/atagt [1468,1472]/gtagt [2572,2576]/atagt [3276,3280]/atagt [3611,3615]/atagt [5213,5217]/atagt [6162,6166]/gtagt [6716,6720]/atagt [6823,6827]/atagt [6859,6863]	ttttat [207,212]/ttttat [239,244]/ttttat [312,317]/ttttat [811,816]/ttttat [1363,1368]/ttttat [1621,1626]/ttttat [2349,2354]/ttttat [2473,2478]/ttttat [3317,3322]/ttttat [3381,3386]/ttttat [3677,3682]/ttttat [3965,3970]/ttttat [4047,4052]/ttttat [5758,5763]/ttttat [6819,6824]/ttttat [6844,6849]/ttttat [7024,7029]/ttttaaat [7126,7133]	tgtacata [1048,1055]/tgtatata [2748,2755]/tgtatata [6625,6632]/tgtaaata [6994,7001]	attgtct [999,1005]/tttatct [3966,3972]/attatct [4819,4825]/tttgtct [4871,4877]/tttatct [5904,5910]/tttgtct [6095,6101]/attgtct [6595,6601]/attatct [7002,7008]
3HSAR000032007_CR000195673 236	none	none	none	none
3HSAR000058478_CR001262126 1034	atagt [647,651]/gtag [745,748]/gtag [904,907]	ttttaat [891,897]	tgtacata [830,837]	none
3HSAR000012020_CR000073243 841	gtagt [241,245]/gtag [684,687]	ttttat [48,53]	none	none
3HSAR000031282_CR000191242 283	atagt [261,265]	ttttat [265,270]	none	none
3HSAR000041064_CR000531697 1364	gtagt [242,246]/gtagt [928,932]/atagt [1072,1076]/atagt [1279,1283]	ttttat [1008,1013]/ttttat [1039,1044]	tgtatata [1318,1325]	none
3HSAR000057926_CR001257926 974	gtagt [418,422]/gtagt [608,612]/gttagt [716,721]/gtag [832,835]	ttttcat [406,412]	none	none
3HSAR000043726_CR000601364 1520	atagt [563,567]/gtagt [1454,1458]	ttttcat [1000,1006]	none	tttgtct [471,477]
3HSAR000047689_CR000715011 1535	atagt [557,561]/atagt [589,593]/atagt [872,876]/gtagt [1323,1327]/atttagt [1470,1476]	ttttact [985,991]	none	none
3HSAR000017272_CR000105688 3262	gtagt [193,197]/gtagt [436,440]/atagt [2066,2070]/gtagt [2144,2148]/atagt [2456,2460]/atagt [2808,2812]/attagt [3142,3147]	ttttat [2492,2497]/ttttat [2765,2770]/ttttat [2835,2840]/ttttat [3136,3141]	none	attatct [88,94]
3HSAR000026692_CR000163367 176	none	none	none	attgtct [141,147]
3HSAR000021949_CR000134432 932	gtag [851,854]	ttttaat [410,416]/ttttaat [552,558]	tgtacata [382,389]	none
3HSAR000031464_CR000192348 36	none	none	none	none
3HSAR000009840_CR000060225 621	gtag [221,224]	none	none	none
3HSAR000063326_CR001399480 158	none	ttttcat [20,26]	none	none
3HSAR000022530_CR000137941 670	gtag [332,335]	ttttaat [600,606]	none	none
3HSAR000029879_CR000182707 79	none	ttttat [47,52]	none	none
3HSAR000027610_CR000168956 63	none	none	none	none
3HSAR000059569_CR001374078 1305	attagt [500,505]/gtag [1177,1180]	ttttaat [284,290]/ttttaaat [517,524]	none	tttatct [608,614]
3HSAR000033071_CR000204122 1107	gtag [235,238]	none	none	tttgtct [545,551]
3HSAR000045289_CR000625906 2153	atagt [34,38]/atagt [122,126]/gtagt [164,168]/atagt [233,237]/gtagt [380,384]/atagt [574,578]/atagt [1094,1098]/atagt [1208,1212]/gtagt [1391,1395]/gtagt [1477,1481]/gtagt [2045,2049]	ttttat [1818,1823]/ttttat [1997,2002]	none	none
3HSAR000042041_CR000588154 2661	atagt [430,434]/gtagt [565,569]/atagt [1803,1807]/atagt [2524,2528]/gtag [2549,2552]	ttttat [110,115]/ttttat [380,385]/ttttat [444,449]/ttttat [549,554]/ttttat [783,788]/ttttat [2061,2066]/ttttaagt [2543,2550]	none	attgtct [322,328]/tttatct [1935,1941]
3HSAR000047269_CR000640655 2117	gtagt [49,53]/atagt [412,416]/gtagt [612,616]/atagt [671,675]/atagt [1633,1637]/atagt [1982,1986]	ttttat [1264,1269]/ttttat [1337,1342]/ttttat [1744,1749]	tgtatata [131,138]	none
3HSAR000005076_CR000031657 929	gtagt [373,377]	ttttat [797,802]	none	none
3HSAR000012788_CR000077894 8734	gtagt [1514,1518]/gtagt [2270,2274]/atagt [2751,2755]/gtagt [2889,2893]/atagt [3115,3119]/atagt [3196,3200]/gtagt [3478,3482]/atagt [4222,4226]/gtagt [4495,4499]/atagt [5208,5212]/atagt [6055,6059]/gtagt [6295,6299]/gtagt [7116,7120]/atagt [7324,7328]/atagt [7571,7575]/atagt [8003,8007]/gtagt [8540,8544]/atagt [8594,8598]	ttttat [738,743]/ttttat [1078,1083]/ttttat [1140,1145]/ttttat [2394,2399]/ttttat [2997,3002]/ttttat [3053,3058]/ttttat [3140,3145]/ttttat [4700,4705]/ttttat [6109,6114]/ttttat [7545,7550]/ttttat [8019,8024]/ttttat [8044,8049]/ttttaat [8358,8364]/ttttaat [8702,8708]	tgtatata [3520,3527]/tgtatata [3619,3626]/tgtagata [7799,7806]/tgtaaata [8647,8654]	tttatct [2998,3004]/tttatct [3421,3427]/tttatct [4633,4639]/attgtct [5230,5236]/tttgtct [5545,5551]/attatct [7538,7544]/attatct [7731,7737]/attgtct [8687,8693]
3HSAR000022552_CR000138070 5172	gtagt [333,337]/gtagt [355,359]/atagt [393,397]/gtagt [635,639]/gtagt [1806,1810]/atagt [2326,2330]/atagt [2596,2600]/gtagt [4890,4894]	ttttat [1129,1134]/ttttat [1852,1857]/ttttat [1961,1966]/ttttat [2295,2300]/ttttat [2713,2718]/ttttat [3576,3581]/ttttat [4014,4019]/ttttat [4855,4860]/ttttat [4904,4909]/ttttat [5049,5054]	tgtatata [225,232]/tgtaaata [831,838]/tgtacata [4661,4668]	tttgtct [1032,1038]/attgtct [4546,4552]/tttgtct [5124,5130]
3HSAR000035695_CR000227727 2661	atagt [2587,2591]	ttttat [2215,2220]	tgtacata [1194,1201]/tgtacata [1362,1369]	tttatct [667,673]
3HSAR000043609_CR000600541 187	none	none	none	none
3HSAR000052187_CR000748519 469	none	none	none	none
3HSAR000029114_CR000178038 38	none	none	none	none
3HSAR000037381_CR000241203 2340	gtagt [1010,1014]/atagt [1537,1541]/attagt [1701,1706]/gtag [1885,1888]	none	none	attgtct [1666,1672]/tttatct [1963,1969]
3HSAR000051532_CR000743493 489	gtag [150,153]	none	none	none
3HSAR000023047_CR000141068 576	atagt [175,179]/gtagt [338,342]/gtagt [364,368]	ttttat [425,430]/ttttat [488,493]/ttttaagt [495,502]	none	none
3HSAR000056838_CR001250026 261	gtag [158,161]	ttttcat [84,90]	none	none
3HSAR000027225_CR000166598 711	gtagt [481,485]/gtag [656,659]	ttttaagt [667,674]/ttttact [701,707]	none	none
3HSAR000043964_CR000603175 529	gtag [154,157]/gtag [171,174]	ttttaat [493,499]	none	none
3HSAR000041849_CR000586231 6397	gtagt [2226,2230]/gtagt [2907,2911]/atagt [2965,2969]/gtagt [3055,3059]/gtagt [3374,3378]/atagt [3479,3483]/gtagt [3585,3589]/atagt [3956,3960]/atagt [4639,4643]/atagt [4981,4985]/gtagt [6062,6066]/gtagt [6177,6181]	ttttat [1096,1101]/ttttat [1461,1466]/ttttat [4932,4937]/ttttat [4975,4980]/ttttaagt [4992,4999]/ttttact [6357,6363]	tgtatata [757,764]	tttgtct [3310,3316]/tttatct [4150,4156]
3HSAR000006703_CR000041618 2932	atagt [31,35]/gtagt [1084,1088]/gtagt [1841,1845]/atagt [2024,2028]/gtagt [2193,2197]/gttagt [2357,2362]	ttttat [1427,1432]/ttttat [1967,1972]/ttttat [2011,2016]/ttttat [2106,2111]/ttttat [2486,2491]/ttttat [2663,2668]/ttttaaat [2737,2744]/ttttcat [2746,2752]	tgtatata [1977,1984]	tttatct [1882,1888]
3HSAR000030604_CR000187193 34	gtag [11,14]	none	none	none
3HSAR000060236_CR001378048 4256	gtagt [515,519]/gtagt [724,728]/atagt [1126,1130]/atagt [1827,1831]/atagt [3216,3220]/gtagt [3286,3290]/attagt [3839,3844]/gtag [3888,3891]	ttttat [357,362]/ttttat [1528,1533]/ttttat [2226,2231]/ttttat [2247,2252]/ttttat [4104,4109]/ttttat [4110,4115]/ttttat [4124,4129]	tgtatata [1639,1646]	attatct [2559,2565]/tttatct [2603,2609]
3HSAR000019012_CR000116403 262	none	none	none	none
3HSAR000060061_CR001377000 153	none	none	none	none
3HSAR000021556_CR000132051 95	none	none	none	none
3HSAR000037385_CR000241232 801	gtagt [90,94]/atagt [191,195]/gtagt [455,459]/gtagt [468,472]/atagt [757,761]	ttttaaat [106,113]/ttttaaat [602,609]	none	none
3HSAR000054021_CR000787247 400	none	none	none	none
3HSAR000013804_CR000084188 851	gtag [587,590]	ttttat [426,431]	none	attgtct [549,555]
3HSAR000039229_CR000254467 2265	atagt [763,767]/gtagt [904,908]/atagt [1560,1564]/gtag [1580,1583]	ttttat [1813,1818]/ttttat [1937,1942]/ttttat [2175,2180]	none	tttatct [247,253]
3HSAR000058927_CR001369626 506	gttagt [168,173]/gtag [254,257]/gtag [321,324]	ttttat [199,204]	none	none
3HSAR000031362_CR000191726 1177	gtagt [189,193]/gtagt [971,975]	ttttat [144,149]/ttttat [1046,1051]	tgtatata [818,825]/tgtaaata [826,833]/tgtatata [846,853]/tgtatata [862,869]	tttatct [1161,1167]
3HSAR000036978_CR000238318 138	none	none	none	none
3HSAR000031178_CR000190624 515	none	none	none	none
3HSAR000026060_CR000159486 762	gttagt [332,337]/attagt [595,600]/gtag [678,681]	ttttat [319,324]	none	none
3HSAR000028694_CR000175488 94	atagt [45,49]/atttagt [64,70]	none	none	none
3HSAR000033913_CR000210563 1916	atagt [1281,1285]/gtagt [1493,1497]/gttagt [1659,1664]	ttttat [588,593]/ttttat [597,602]/ttttat [796,801]/ttttat [876,881]/ttttat [1001,1006]/ttttact [1444,1450]/ttttact [1709,1715]	tgtaaata [260,267]	none
3HSAR000055054_CR000796129 436	gtag [25,28]/gtag [203,206]/gtag [356,359]	ttttat [112,117]/ttttact [330,336]	none	none
3HSAR000025808_CR000157943 38	none	none	none	none
3HSAR000004544_CR000028416 855	none	none	none	none
3HSAR000054662_CR000793313 5626	atagt [519,523]/atagt [755,759]/gtagt [780,784]/atagt [1249,1253]/gtagt [1377,1381]/gtagt [2383,2387]/atagt [3353,3357]/atagt [4518,4522]/atagt [4640,4644]/atagt [4692,4696]/gttagt [4707,4712]/gtag [5286,5289]/gtag [5349,5352]/gtag [5517,5520]	ttttat [344,349]/ttttat [594,599]/ttttat [798,803]/ttttat [977,982]/ttttat [1226,1231]/ttttat [2422,2427]/ttttat [2994,2999]/ttttat [4275,4280]/ttttat [4285,4290]/ttttat [4416,4421]/ttttat [4551,4556]/ttttaaat [4631,4638]	tgtagata [3021,3028]/tgtacata [3205,3212]	tttgtct [3173,3179]/attatct [3231,3237]
3HSAR000022245_CR000136191 94	none	none	none	none
3HSAR000025792_CR000157845 2124	gtagt [549,553]/gtagt [670,674]/gtagt [844,848]/gtag [1124,1127]/gtag [1178,1181]/gtag [1367,1370]/gtag [1432,1435]/gtag [1958,1961]	ttttat [1905,1910]/ttttat [2108,2113]	none	attatct [1926,1932]
3HSAR000027257_CR000166795 443	gtagt [383,387]	none	none	none
3HSAR000012374_CR000075377 3258	atagt [929,933]/atagt [961,965]/atagt [2027,2031]/atttagt [2078,2084]/gtag [2884,2887]/gtag [3004,3007]/gtag [3090,3093]	ttttat [3134,3139]/ttttaat [3213,3219]	none	attgtct [214,220]/attgtct [1712,1718]
3HSAR000063718_CR001402240 872	gtagt [532,536]/atagt [759,763]	ttttact [652,658]	tgtaaata [723,730]	none
3HSAR000041799_CR000585696 88	none	none	none	none
3HSAR000066046_CR001633586 310	none	none	none	none
3HSAR000030928_CR000189152 1101	none	none	none	none
3HSAR000055529_CR000799842 2342	atagt [2216,2220]/atagt [2226,2230]/gtagt [2309,2313]	ttttaat [1911,1917]	none	none
3HSAR000063841_CR001403123 851	gtag [132,135]	ttttaat [590,596]	none	none
3HSAR000002956_CR000018630 1886	atagt [1259,1263]/gtagt [1734,1738]	none	tgtacata [1108,1115]	tttgtct [164,170]/tttgtct [547,553]/attgtct [1189,1195]
3HSAR000057389_CR001253868 413	gtag [307,310]	none	none	none
3HSAR000022066_CR000135118 345	gtag [271,274]	ttttat [310,315]	tgtatata [199,206]	none
3HSAR000004122_CR000025818 952	gtag [710,713]	none	none	none
3HSAR000035127_CR000220229 620	gtag [256,259]	none	none	attgtct [611,617]
3HSAR000023886_CR000146173 22	none	none	none	none
3HSAR000010246_CR000062652 68	none	none	none	none
3HSAR000045590_CR000628048 657	atagt [374,378]	ttttat [324,329]	none	none
3HSAR000040336_CR000267702 2094	atagt [274,278]/gtagt [439,443]/atagt [733,737]/atagt [960,964]/atagt [1702,1706]/atttagt [2050,2056]	ttttat [146,151]/ttttat [270,275]/ttttat [935,940]/ttttat [1055,1060]/ttttat [1387,1392]/ttttaat [1394,1400]/ttttaaat [2007,2014]	none	tttgtct [1324,1330]/attatct [1524,1530]
3HSAR000044796_CR000612394 1673	gtagt [1522,1526]	ttttat [1183,1188]	tgtatata [1053,1060]/tgtaaata [1344,1351]	tttgtct [905,911]
3HSAR000046590_CR000635824 420	atagt [105,109]/gtag [230,233]	none	none	none
3HSAR000020454_CR000125208 83	none	none	none	none
3HSAR000061992_CR001389957 1887	none	none	none	tttatct [484,490]
3HSAR000066532_CR001713681 964	atagt [214,218]/atagt [338,342]/gtagt [910,914]	ttttat [353,358]/ttttat [880,885]	none	attgtct [529,535]/tttgtct [614,620]/tttatct [881,887]
3HSAR000021009_CR000128655 1673	atagt [780,784]/attagt [1409,1414]	none	none	attgtct [1126,1132]
3HSAR000015421_CR000094185 1099	atagt [887,891]/gtag [903,906]/gtag [1017,1020]	ttttat [253,258]/ttttat [458,463]/ttttaaat [531,538]	none	none
3HSAR000063909_CR001403616 5053	atagt [961,965]/atagt [2584,2588]/gtagt [2792,2796]/gtagt [3185,3189]/gtagt [3202,3206]/atagt [3495,3499]/gtagt [3575,3579]/gtagt [3921,3925]/atagt [4285,4289]/gtttagt [4407,4413]	ttttat [30,35]/ttttat [612,617]/ttttat [1474,1479]/ttttat [3228,3233]/ttttat [3259,3264]/ttttat [4242,4247]/ttttat [4934,4939]/ttttaat [4948,4954]	tgtaaata [2862,2869]/tgtacata [2985,2992]/tgtatata [3324,3331]	tttgtct [4101,4107]
3HSAR000021814_CR000133620 652	gtagt [493,497]	none	none	none
3HSAR000059299_CR001372236 456	gtag [17,20]/gtag [255,258]	none	none	none
3HSAR000030439_CR000186180 506	none	ttttat [496,501]	none	none
3HSAR000059475_CR001373451 470	gtagt [280,284]/gtag [340,343]	ttttact [268,274]	none	none
3HSAR000043389_CR000598912 132	none	ttttaaat [57,64]	none	none
3HSAR000062648_CR001394634 3313	atagt [55,59]/atagt [156,160]/gtagt [728,732]/gtagt [749,753]/atagt [1142,1146]/atagt [1164,1168]/atagt [1224,1228]/atagt [1232,1236]/gtagt [1516,1520]/gtagt [1862,1866]/atagt [1879,1883]/attagt [1973,1978]/gtag [2459,2462]/gtag [2512,2515]/gtag [2646,2649]/gtag [2862,2865]/gtag [3056,3059]	ttttat [661,666]/ttttat [2083,2088]/ttttaaat [2813,2820]/ttttaagt [3029,3036]	tgtatata [1438,1445]/tgtatata [1874,1881]	none
3HSAR000021000_CR000128601 377	gtagt [235,239]/gtag [367,370]	none	none	none
3HSAR000021899_CR000134128 523	gtag [175,178]/gtag [451,454]	ttttat [212,217]/ttttat [284,289]	none	none
3HSAR000012917_CR000078686 64	none	none	none	none
3HSAR000044492_CR000607222 1092	gttagt [716,721]	none	tgtaaata [741,748]	tttgtct [610,616]
3HSAR000032775_CR000200577 437	none	ttttaaat [270,277]	none	tttgtct [326,332]
3HSAR000033031_CR000203807 985	gtagt [399,403]/gtagt [456,460]/atagt [523,527]/gtagt [538,542]/gtagt [580,584]	ttttat [542,547]/ttttcat [805,811]	none	none
3HSAR000015891_CR000097096 123	none	none	none	none
3HSAR000051205_CR000741323 367	atagt [277,281]/attagt [310,315]	ttttact [47,53]	none	none
3HSAR000050022_CR000732774 6419	atagt [247,251]/gtagt [1870,1874]/gtagt [2352,2356]/atagt [2394,2398]/atagt [5766,5770]/gtagt [5968,5972]/atagt [6092,6096]/atagt [6232,6236]/gtagt [6296,6300]	ttttat [63,68]/ttttat [628,633]/ttttat [1776,1781]/ttttat [5762,5767]/ttttcat [6073,6079]	tgtacata [2403,2410]/tgtatata [5674,5681]	attgtct [4295,4301]/attgtct [5334,5340]
3HSAR000024217_CR000148170 291	none	none	none	none
3HSAR000050283_CR000734707 509	atagt [235,239]/gtag [376,379]	ttttat [309,314]/ttttat [432,437]	none	none
3HSAR000065634_CR001630368 786	none	ttttaat [771,777]	none	none
3HSAR000044761_CR000609382 1128	gtagt [54,58]/atagt [65,69]/gtttagt [575,581]/gtag [720,723]/gtag [741,744]/gtag [937,940]	none	none	attatct [989,995]/attatct [1026,1032]
3HSAR000003513_CR000022117 104	none	none	none	none
3HSAR000056383_CR001226501 180	gtag [69,72]	ttttat [139,144]/ttttat [162,167]	none	attatct [74,80]
3HSAR000064178_CR001405539 5043	gtagt [244,248]/atagt [694,698]/gtagt [880,884]/atagt [2313,2317]/gtagt [2913,2917]/atagt [2953,2957]/atagt [3670,3674]/atagt [4085,4089]/atagt [4756,4760]/gtag [4840,4843]	ttttat [489,494]/ttttat [658,663]/ttttat [746,751]/ttttat [2060,2065]/ttttat [3345,3350]/ttttat [3369,3374]/ttttat [3858,3863]/ttttat [4745,4750]/ttttaat [4786,4792]/ttttaaat [4889,4896]	none	tttatct [988,994]/attgtct [1007,1013]/attgtct [1457,1463]/tttatct [4912,4918]
3HSAR000010814_CR000066049 1124	gtagt [489,493]/gtagt [520,524]/gtagt [586,590]	ttttat [947,952]	none	tttatct [635,641]/attgtct [1053,1059]
3HSAR000034042_CR000211538 4478	gtagt [1288,1292]/atagt [1316,1320]/atagt [1378,1382]/atagt [2698,2702]/atagt [3896,3900]/gtagt [3942,3946]	ttttat [1092,1097]/ttttat [1526,1531]/ttttaat [2026,2032]/ttttaat [2922,2928]	tgtacata [3870,3877]/tgtaaata [4370,4377]	attatct [2678,2684]
3HSAR000061876_CR001389166 205	gtag [66,69]	none	none	none
3HSAR000066886_CR001716825 984	gtagt [86,90]/atagt [470,474]/gtag [567,570]/gtag [656,659]/gtag [794,797]	ttttat [61,66]/ttttat [329,334]/ttttat [910,915]	none	none
3HSAR000042135_CR000589196 2504	atagt [112,116]/atagt [272,276]/atagt [329,333]/gtagt [526,530]/gtagt [2233,2237]/gtag [2305,2308]	ttttat [882,887]/ttttat [1995,2000]/ttttat [2325,2330]	tgtacata [93,100]/tgtaaata [267,274]/tgtaaata [1145,1152]	attgtct [205,211]/tttgtct [916,922]
3HSAR000027187_CR000166372 1149	gtagt [195,199]/atagt [224,228]/gtagt [380,384]/gtagt [399,403]/atagt [462,466]/atagt [801,805]/gtagt [1013,1017]/atagt [1030,1034]	ttttat [698,703]/ttttat [942,947]	none	none
3HSAR000045677_CR000628681 2701	atagt [650,654]/atagt [767,771]/atagt [2273,2277]/atagt [2333,2337]/gtag [2449,2452]	ttttat [657,662]/ttttat [1299,1304]	none	none
3HSAR000006767_CR000042021 882	gtag [872,875]	ttttat [467,472]	tgtagata [871,878]	attgtct [714,720]
3HSAR000015070_CR000091982 5148	gtagt [226,230]/atagt [1766,1770]/gtagt [2437,2441]/gtagt [2780,2784]/atagt [3273,3277]/gtagt [3473,3477]/gtag [3996,3999]/gtag [4613,4616]/gtag [4986,4989]	ttttat [2540,2545]/ttttat [3967,3972]/ttttat [4044,4049]/ttttat [4358,4363]/ttttat [4720,4725]/ttttaagt [4804,4811]	tgtatata [3104,3111]	tttatct [304,310]
3HSAR000014064_CR000085795 1475	atagt [296,300]/gtagt [417,421]/atagt [1095,1099]/atagt [1100,1104]/gtagt [1360,1364]/gtag [1439,1442]	ttttat [245,250]/ttttat [274,279]/ttttat [547,552]/ttttat [1015,1020]/ttttaagt [1295,1302]	tgtatata [675,682]	none
3HSAR000041883_CR000586527 4126	gttagt [2613,2618]/gtag [3117,3120]/gtag [3439,3442]/gtag [3812,3815]	none	none	none
3HSAR000030988_CR000189503 46	atagt [8,12]	none	tgtatata [12,19]	none
3HSAR000045819_CR000629742 577	gtag [515,518]	none	none	none
3HSAR000007543_CR000046696 1680	gtagt [176,180]/attagt [1603,1608]	ttttat [674,679]	tgtaaata [920,927]	none
3HSAR000024323_CR000148811 1872	atagt [376,380]/gttagt [1245,1250]/gtag [1427,1430]	ttttat [532,537]/ttttat [1048,1053]/ttttat [1260,1265]/ttttat [1551,1556]/ttttat [1714,1719]/ttttat [1787,1792]/ttttat [1808,1813]	tgtaaata [734,741]/tgtatata [851,858]/tgtatata [1611,1618]	tttgtct [837,843]
3HSAR000066227_CR001634586 661	gtag [480,483]	none	none	none
3HSAR000029355_CR000179483 1167	gtagt [1088,1092]	none	none	none
3HSAR000052543_CR000751065 3801	atagt [395,399]/atagt [669,673]/atagt [2269,2273]/gtagt [2407,2411]/atagt [2494,2498]/atagt [3611,3615]	ttttat [2515,2520]/ttttat [2554,2559]/ttttat [2729,2734]/ttttat [3239,3244]/ttttat [3540,3545]	tgtatata [947,954]	none
3HSAR000037129_CR000239402 3010	atagt [1901,1905]	ttttaaat [1877,1884]	tgtaaata [2615,2622]	tttgtct [180,186]
3HSAR000006860_CR000042591 267	none	none	none	none
3HSAR000032473_CR000198664 26	none	none	none	none
3HSAR000065285_CR001625273 74	none	none	none	none
3HSAR000001646_CR000010218 449	atagt [73,77]/gtagt [163,167]/gtag [199,202]	none	none	tttatct [363,369]
3HSAR000008531_CR000052354 522	atagt [253,257]/atagt [292,296]	none	tgtaaata [173,180]	tttgtct [2,8]
3HSAR000026117_CR000159838 2022	gtag [245,248]/gtag [664,667]	none	tgtacata [1020,1027]	none
3HSAR000021902_CR000134146 723	atagt [280,284]	ttttat [464,469]	none	none
3HSAR000061660_CR001387603 191	atagt [124,128]	none	none	none
3HSAR000066405_CR001713134 2240	gtagt [343,347]/atagt [363,367]/gtagt [604,608]/gtagt [827,831]/atagt [980,984]/gtagt [1381,1385]/gtag [2069,2072]	ttttaat [2201,2207]	tgtaaata [2108,2115]	attatct [735,741]
3HSAR000004339_CR000027167 936	atagt [221,225]/atagt [552,556]/atagt [931,935]	ttttat [660,665]/ttttat [724,729]/ttttaat [905,911]	none	tttatct [79,85]/attgtct [733,739]
3HSAR000016025_CR000097947 2762	gtag [159,162]/gtag [1349,1352]/gtag [1876,1879]/gtag [2481,2484]	ttttat [1387,1392]	none	tttgtct [777,783]
3HSAR000005906_CR000036733 4934	gtagt [821,825]/atagt [889,893]/atagt [1684,1688]/atagt [4533,4537]/atagt [4608,4612]/gtagt [4867,4871]	ttttat [1210,1215]/ttttat [2430,2435]/ttttat [2575,2580]/ttttat [2602,2607]/ttttat [2725,2730]/ttttat [2971,2976]/ttttat [3153,3158]	none	tttgtct [388,394]/tttatct [3613,3619]
3HSAR000054852_CR000794776 330	gtag [103,106]/gtag [155,158]	ttttat [226,231]/ttttat [285,290]	none	none
3HSAR000037821_CR000244284 945	none	none	none	none
3HSAR000044626_CR000608331 270	gtag [100,103]	none	none	none
3HSAR000049044_CR000725553 2725	gtagt [1050,1054]/atagt [1530,1534]/gtagt [1728,1732]/gtagt [1811,1815]/atagt [2580,2584]	ttttat [460,465]/ttttat [1440,1445]/ttttat [2153,2158]/ttttat [2677,2682]	tgtatata [1968,1975]	attgtct [1199,1205]/tttatct [1441,1447]/attgtct [2534,2540]
3HSAR000063541_CR001400997 869	atagt [747,751]	none	none	none
3HSAR000015320_CR000093557 1706	gtagt [297,301]/gtagt [654,658]/atagt [896,900]/gtagt [1197,1201]/gtagt [1451,1455]/gtag [1657,1660]	ttttat [231,236]/ttttat [1334,1339]/ttttat [1574,1579]/ttttaat [1599,1605]	tgtatata [820,827]	none
3HSAR000059229_CR001371735 325	gtag [42,45]	none	none	none
3HSAR000019435_CR000118965 345	none	ttttat [304,309]/ttttaaat [319,326]	none	none
3HSAR000037637_CR000242986 1557	gtagt [283,287]/gtagt [851,855]/atagt [1418,1422]	ttttat [94,99]/ttttat [218,223]/ttttaaat [1151,1158]	tgtatata [393,400]	tttgtct [502,508]
3HSAR000023198_CR000141993 540	none	none	none	none
3HSAR000063318_CR001399417 1294	gtagt [917,921]/gtag [968,971]/gtag [1042,1045]	ttttat [194,199]/ttttat [504,509]/ttttat [605,610]/ttttat [706,711]/ttttat [1036,1041]/ttttaat [1106,1112]	none	none
3HSAR000066355_CR001712915 2319	atagt [685,689]/gttagt [1977,1982]	ttttat [327,332]/ttttaat [657,663]/ttttaat [737,743]/ttttcat [1177,1183]	tgtacata [1445,1452]	none
3HSAR000064714_CR001409475 3082	gtagt [649,653]/gtagt [655,659]/gtagt [1563,1567]/atagt [1652,1656]/gtag [1675,1678]/gtag [2773,2776]	ttttaat [702,708]/ttttaat [801,807]/ttttaat [2169,2175]/ttttaaat [2884,2891]	none	tttgtct [590,596]
3HSAR000026496_CR000162142 337	none	none	none	none
3HSAR000001525_CR000009490 1094	gtagt [840,844]/gtagt [951,955]/gtagt [1042,1046]	ttttat [296,301]/ttttat [747,752]/ttttat [834,839]/ttttat [912,917]/ttttcat [986,992]	none	tttatct [748,754]/attatct [1028,1034]
3HSAR000007809_CR000048273 3253	atagt [1683,1687]/gtagt [1766,1770]/gttagt [2851,2856]	ttttat [1231,1236]/ttttat [1725,1730]/ttttat [2384,2389]/ttttat [2740,2745]/ttttat [2870,2875]/ttttcat [3008,3014]	tgtatata [1648,1655]	attgtct [2374,2380]
3HSAR000005676_CR000035337 2924	atagt [120,124]/atagt [543,547]/atagt [2398,2402]/atagt [2417,2421]/atagt [2591,2595]/atagt [2613,2617]	ttttat [1682,1687]	tgtagata [992,999]	tttgtct [1309,1315]
3HSAR000050686_CR000737722 4032	gtagt [454,458]/attagt [3042,3047]/gtttagt [3786,3792]	ttttat [948,953]	none	none
3HSAR000054894_CR000795033 234	atagt [159,163]	ttttat [187,192]	none	none
3HSAR000061516_CR001386565 84	none	none	none	none
3HSAR000058405_CR001261562 309	attagt [172,177]	ttttat [126,131]/ttttcat [272,278]	none	none
3HSAR000017431_CR000106673 1159	atagt [307,311]/gtagt [750,754]/gtagt [818,822]/atagt [1092,1096]	ttttat [171,176]/ttttat [268,273]/ttttat [841,846]/ttttaat [901,907]/ttttcat [1087,1093]	none	tttatct [850,856]/attatct [1069,1075]
3HSAR000038763_CR000251066 698	gtag [83,86]/gtag [516,519]	ttttat [170,175]/ttttcat [475,481]	none	tttatct [587,593]
3HSAR000017693_CR000108280 4092	gtagt [311,315]/atagt [327,331]/gtagt [1276,1280]/atagt [1422,1426]/gtagt [2010,2014]/atagt [2152,2156]/atagt [2905,2909]/atagt [3933,3937]/gtagt [3959,3963]/gtag [4058,4061]	ttttat [150,155]/ttttat [430,435]/ttttat [1103,1108]/ttttat [1720,1725]/ttttat [1818,1823]/ttttat [1975,1980]/ttttat [2447,2452]/ttttat [2637,2642]/ttttat [2669,2674]/ttttat [2893,2898]/ttttat [2932,2937]/ttttat [3424,3429]/ttttaat [3504,3510]	tgtaaata [1793,1800]	tttatct [151,157]/attgtct [283,289]/attatct [529,535]/tttgtct [786,792]/tttgtct [2943,2949]
3HSAR000066154_CR001634201 1684	atagt [350,354]/gtagt [467,471]/attagt [1139,1144]	ttttat [84,89]/ttttat [555,560]/ttttat [664,669]	none	tttgtct [363,369]/attatct [1273,1279]
3HSAR000001278_CR000007927 2330	gtag [45,48]/gtag [1893,1896]	ttttat [2091,2096]	none	none
3HSAR000015377_CR000093916 291	none	none	none	none
3HSAR000041582_CR000583612 569	atagt [257,261]	ttttat [111,116]/ttttaat [349,355]/ttttaagt [532,539]	none	tttgtct [92,98]
3HSAR000031621_CR000193320 1031	gtagt [265,269]/atagt [1017,1021]	ttttaagt [799,806]	none	none
3HSAR000052359_CR000749721 1172	atagt [3,7]/gtag [751,754]/gtag [1024,1027]/gtag [1063,1066]	ttttat [214,219]/ttttat [481,486]	tgtaaata [23,30]	tttgtct [165,171]
3HSAR000063945_CR001403857 4058	gtagt [789,793]/atagt [799,803]/atagt [869,873]/atagt [1855,1859]/atagt [2221,2225]/atagt [2899,2903]/gtagt [3295,3299]/gtag [3347,3350]/gtag [3435,3438]	ttttat [1062,1067]/ttttat [2101,2106]/ttttat [3093,3098]/ttttcat [3779,3785]	none	tttgtct [363,369]/tttgtct [2028,2034]/tttgtct [2256,2262]/attatct [3147,3153]
3HSAR000045663_CR000628572 436	gtagt [332,336]	none	none	none
3HSAR000008433_CR000051758 1773	gtagt [260,264]/atagt [1092,1096]/gtagt [1533,1537]/atagt [1581,1585]	ttttat [160,165]/ttttat [597,602]/ttttat [1757,1762]	tgtatata [935,942]	none
3HSAR000061719_CR001388033 2108	atagt [106,110]/gtagt [357,361]/atagt [526,530]/atagt [1592,1596]/gtagt [1826,1830]	ttttat [841,846]/ttttat [1324,1329]/ttttat [1465,1470]/ttttat [1736,1741]/ttttaagt [2065,2072]	tgtaaata [413,420]	attatct [861,867]/tttatct [1466,1472]
3HSAR000043562_CR000600217 1196	atagt [244,248]/gtagt [398,402]/atagt [521,525]/atagt [527,531]/atagt [649,653]/atagt [1064,1068]/atagt [1106,1110]	ttttat [943,948]/ttttat [949,954]/ttttat [1100,1105]	tgtaaata [58,65]/tgtaaata [808,815]	attatct [177,183]
3HSAR000023009_CR000140836 706	gtag [233,236]	none	none	tttgtct [579,585]
3HSAR000045208_CR000625503 15	none	none	none	none
3HSAR000006959_CR000043204 774	atagt [441,445]/atagt [767,771]	ttttat [66,71]/ttttact [522,528]/ttttcat [762,768]	tgtatata [187,194]/tgtatata [622,629]	tttgtct [317,323]
3HSAR000047038_CR000638980 64	gtag [10,13]	none	none	none
3HSAR000040456_CR000371274 149	atagt [65,69]	none	none	none
3HSAR000056034_CR001223952 1778	atagt [1049,1053]/gtagt [1190,1194]/atagt [1325,1329]/gttagt [1679,1684]	ttttat [269,274]/ttttat [361,366]/ttttat [996,1001]/ttttat [1200,1205]/ttttaaat [1481,1488]	none	attatct [715,721]
3HSAR000014939_CR000091194 666	gtag [417,420]	ttttat [177,182]	none	tttgtct [462,468]
3HSAR000034620_CR000216471 2509	atagt [269,273]/gtagt [712,716]/gtagt [1183,1187]/atagt [1193,1197]/gtagt [1627,1631]/atagt [1746,1750]/gtagt [2073,2077]/atagt [2334,2338]	ttttat [663,668]/ttttat [2346,2351]/ttttat [2397,2402]	tgtatata [60,67]/tgtaaata [764,771]	none
3HSAR000027528_CR000168455 2217	attagt [1978,1983]	ttttat [1698,1703]/ttttaat [2113,2119]	tgtacata [1284,1291]/tgtaaata [1361,1368]	tttgtct [1994,2000]
3HSAR000000319_CR000001893 348	gtagt [47,51]	ttttat [58,63]	none	none
3HSAR000051869_CR000746014 659	gtagt [430,434]/atagt [467,471]/gtag [546,549]/gtag [603,606]	none	none	none
3HSAR000022986_CR000140698 100	none	none	none	none
3HSAR000047142_CR000639733 71	none	none	none	none
3HSAR000039304_CR000255055 1075	none	ttttat [1012,1017]	none	none
3HSAR000001668_CR000010352 64	gtagt [58,62]	none	none	none
3HSAR000051527_CR000743462 2982	atagt [485,489]/gtagt [1983,1987]/attagt [2803,2808]	ttttat [139,144]/ttttat [622,627]/ttttat [1126,1131]/ttttat [1365,1370]/ttttat [1413,1418]/ttttat [1631,1636]/ttttat [1745,1750]/ttttat [2712,2717]	tgtatata [1875,1882]	tttatct [2044,2050]/tttgtct [2093,2099]/attgtct [2265,2271]
3HSAR000020597_CR000126085 407	gtag [89,92]/gtag [197,200]	none	none	none
3HSAR000015465_CR000094457 2464	atagt [683,687]/atagt [826,830]/atagt [833,837]/atagt [1193,1197]/atagt [1209,1213]/gtagt [1518,1522]/atagt [2027,2031]/atagt [2067,2071]/atagt [2332,2336]	ttttat [69,74]/ttttat [262,267]/ttttat [557,562]/ttttat [1311,1316]/ttttat [1438,1443]/ttttat [1528,1533]/ttttat [2083,2088]/ttttat [2206,2211]	tgtatata [1864,1871]	none
3HSAR000062253_CR001391854 180	none	none	none	none
3HSAR000044781_CR000610420 6348	atagt [607,611]/atagt [652,656]/atagt [815,819]/atagt [926,930]/atagt [1519,1523]/atagt [1624,1628]/gtagt [2245,2249]/gtagt [2951,2955]/gtagt [3697,3701]/gtagt [4771,4775]/attagt [5758,5763]/gtag [5836,5839]/gtag [6087,6090]	ttttat [121,126]/ttttat [675,680]/ttttat [1135,1140]/ttttat [1411,1416]/ttttat [1620,1625]/ttttat [2293,2298]/ttttat [2556,2561]/ttttat [2730,2735]/ttttat [3225,3230]/ttttat [3571,3576]/ttttat [4186,4191]/ttttat [4290,4295]/ttttat [4559,4564]/ttttat [5204,5209]/ttttat [5539,5544]/ttttat [5568,5573]/ttttat [6062,6067]/ttttat [6271,6276]/ttttat [6318,6323]	none	tttatct [2626,2632]/attatct [3039,3045]/tttgtct [4180,4186]
3HSAR000054170_CR000788733 681	attagt [231,236]/gtag [458,461]/gtag [562,565]	none	none	none
3HSAR000031840_CR000194650 275	gttagt [89,94]	none	tgtatata [171,178]	none
3HSAR000046362_CR000634294 1931	atagt [187,191]/atagt [1002,1006]/atagt [1176,1180]/gtagt [1422,1426]/atagt [1761,1765]/gtagt [1775,1779]	ttttat [388,393]/ttttat [1152,1157]/ttttat [1172,1177]/ttttat [1363,1368]/ttttat [1466,1471]/ttttat [1847,1852]	none	tttatct [226,232]/tttgtct [1690,1696]
3HSAR000021507_CR000131746 538	attagt [393,398]	none	none	none
3HSAR000051799_CR000745485 365	none	none	none	none
3HSAR000032905_CR000201499 187	none	none	none	none
3HSAR000030280_CR000185195 420	none	ttttat [410,415]	none	none
3HSAR000054362_CR000790560 1382	gtagt [214,218]/gtagt [368,372]/atagt [392,396]/gtagt [1275,1279]	ttttat [274,279]/ttttat [435,440]/ttttat [505,510]/ttttat [810,815]/ttttat [1132,1137]/ttttact [1323,1329]	none	none
3HSAR000054966_CR000795539 1051	atagt [829,833]/gtag [953,956]	none	none	tttgtct [959,965]
3HSAR000055020_CR000795896 578	none	ttttat [19,24]/ttttact [99,105]	none	none
3HSAR000032701_CR000200118 475	none	none	none	none
3HSAR000048511_CR000721418 271	atagt [254,258]	none	none	none
3HSAR000033416_CR000206819 639	atagt [70,74]/gtagt [614,618]	ttttat [570,575]	none	none
3HSAR000032396_CR000198152 1406	atagt [80,84]/atagt [256,260]/atagt [457,461]/atagt [671,675]/atagt [690,694]/atagt [755,759]/atagt [856,860]/atagt [1328,1332]	ttttat [164,169]/ttttat [542,547]/ttttat [718,723]	tgtatata [984,991]	attgtct [293,299]/attatct [1016,1022]
3HSAR000020673_CR000126554 5998	atagt [255,259]/atagt [657,661]/gtagt [3747,3751]/atagt [4294,4298]/gtagt [4992,4996]/gtagt [5454,5458]/atagt [5491,5495]	ttttat [1523,1528]/ttttat [1887,1892]/ttttat [2566,2571]/ttttat [4669,4674]/ttttat [5052,5057]/ttttat [5304,5309]/ttttaat [5979,5985]	tgtaaata [4287,4294]/tgtaaata [5965,5972]	attatct [617,623]/attatct [2507,2513]/tttatct [5305,5311]
3HSAR000050973_CR000739675 2046	atagt [567,571]/gtagt [645,649]/atagt [1051,1055]/atagt [1278,1282]/gtagt [2003,2007]	ttttat [252,257]/ttttat [1165,1170]	none	tttgtct [391,397]/tttatct [683,689]/tttgtct [1115,1121]
3HSAR000064702_CR001409392 50	none	none	none	none
3HSAR000064279_CR001406260 1255	gtag [1040,1043]	ttttat [936,941]/ttttat [946,951]	none	tttgtct [436,442]
3HSAR000057866_CR001257473 812	attagt [179,184]/gtag [336,339]	ttttat [343,348]/ttttat [446,451]/ttttat [499,504]/ttttcat [684,690]	none	none
3HSAR000033879_CR000210302 762	atagt [459,463]/atagt [606,610]/atagt [733,737]	ttttat [427,432]/ttttat [447,452]/ttttat [502,507]/ttttat [510,515]/ttttat [697,702]	tgtatata [235,242]/tgtacata [256,263]	tttatct [33,39]
3HSAR000031869_CR000194823 717	gtag [125,128]	ttttact [681,687]	none	none
3HSAR000027995_CR000171242 510	none	ttttat [494,499]	none	none
3HSAR000031795_CR000194374 2311	atagt [935,939]/atagt [1712,1716]	none	none	attatct [1086,1092]
3HSAR000056012_CR001223788 215	none	ttttat [102,107]	none	none
3HSAR000060200_CR001377822 3941	gtagt [525,529]/atagt [1000,1004]/atagt [1790,1794]/gtagt [3162,3166]/gtag [3736,3739]	ttttat [665,670]/ttttat [684,689]/ttttaat [2131,2137]/ttttact [2164,2170]/ttttact [3206,3212]/ttttcat [3692,3698]	tgtaaata [3639,3646]	tttatct [2643,2649]/attatct [2861,2867]/attatct [3893,3899]
3HSAR000058527_CR001262490 58	none	none	none	none
3HSAR000049155_CR000726378 587	atagt [492,496]	none	none	none
3HSAR000056482_CR001227183 775	gtag [480,483]	ttttat [686,691]/ttttaaat [693,700]	none	none
3HSAR000056858_CR001250200 3308	atagt [1176,1180]/atagt [1191,1195]/gtagt [1424,1428]/atagt [1573,1577]/gtagt [2040,2044]/gtagt [2067,2071]/gtagt [2929,2933]/gtagt [3160,3164]/gtag [3239,3242]	ttttat [1767,1772]/ttttat [1789,1794]/ttttat [2482,2487]/ttttat [2792,2797]/ttttaat [2834,2840]/ttttact [2844,2850]	tgtagata [2417,2424]	attatct [121,127]/tttgtct [562,568]
3HSAR000039432_CR000256012 481	gtagt [156,160]	none	none	none
3HSAR000040446_CR000371197 1268	gtagt [585,589]/gtag [655,658]/gtag [806,809]	ttttat [718,723]/ttttaaat [1229,1236]	tgtaaata [411,418]	tttatct [216,222]/tttgtct [1042,1048]
3HSAR000001618_CR000010055 1618	atagt [924,928]	ttttat [254,259]/ttttat [261,266]/ttttat [271,276]/ttttaat [1590,1596]	none	none
3HSAR000049654_CR000730016 1127	gtag [689,692]/gtag [716,719]	ttttat [944,949]	none	none
3HSAR000005737_CR000035693 454	gtag [177,180]	ttttat [291,296]/ttttat [403,408]	tgtaaata [136,143]	none
3HSAR000022050_CR000135018 1540	gtag [403,406]/gtag [1311,1314]	ttttact [919,925]	none	none
3HSAR000033891_CR000210390 2814	atagt [400,404]/atagt [1537,1541]/atagt [1546,1550]/atagt [2147,2151]	ttttat [288,293]/ttttat [410,415]/ttttat [2715,2720]/ttttcat [2742,2748]/ttttcat [2749,2755]	tgtatata [1330,1337]/tgtacata [1500,1507]	attgtct [273,279]/tttatct [411,417]/tttgtct [899,905]/tttatct [1597,1603]
3HSAR000038506_CR000249074 393	none	ttttat [284,289]	none	tttgtct [352,358]
3HSAR000046215_CR000633218 3051	atagt [378,382]/gtagt [595,599]/atagt [832,836]/gtagt [2224,2228]/gtagt [2339,2343]/gtagt [2714,2718]	ttttat [335,340]/ttttat [581,586]/ttttat [910,915]/ttttat [1397,1402]/ttttat [1639,1644]/ttttat [1742,1747]/ttttat [1756,1761]/ttttat [2063,2068]/ttttat [2301,2306]/ttttat [2661,2666]/ttttat [2997,3002]	tgtatata [1005,1012]/tgtacata [2892,2899]	attatct [463,469]/tttatct [954,960]/attatct [995,1001]/attatct [2237,2243]
3HSAR000057202_CR001252598 384	none	ttttat [373,378]	tgtacata [330,337]	none
3HSAR000045876_CR000630306 139	none	none	none	none
3HSAR000038980_CR000252646 1008	none	ttttat [242,247]/ttttaat [775,781]	none	none
3HSAR000066321_CR001712771 734	none	ttttcat [308,314]	none	none
3HSAR000035579_CR000226867 42	none	none	none	none
3HSAR000029677_CR000181453 1786	gtagt [362,366]/gtagt [521,525]/gtagt [1215,1219]/attagt [1448,1453]/gtag [1520,1523]/gtag [1566,1569]	ttttat [738,743]/ttttat [922,927]/ttttat [1737,1742]	none	none
3HSAR000065232_CR001413318 2741	atagt [942,946]/atttagt [1313,1319]/gtag [1490,1493]/gtag [1624,1627]/gtag [1638,1641]	none	none	none
3HSAR000012153_CR000074049 61	none	none	none	none
3HSAR000048933_CR000724717 198	none	none	none	attgtct [100,106]
3HSAR000048078_CR000718154 1570	atagt [454,458]/gtagt [750,754]/gtagt [1493,1497]	ttttat [89,94]/ttttat [246,251]/ttttat [575,580]	none	tttatct [90,96]/attgtct [1143,1149]
3HSAR000057603_CR001255443 2176	atagt [387,391]/atagt [676,680]/atagt [873,877]/gtagt [1154,1158]/gtagt [1767,1771]/atagt [1788,1792]	ttttat [737,742]/ttttat [775,780]/ttttaaat [1427,1434]/ttttaaat [1929,1936]/ttttcat [2009,2015]	none	tttatct [987,993]/tttgtct [1317,1323]
3HSAR000032334_CR000197701 55	none	none	none	none
3HSAR000050242_CR000734399 3299	gtagt [1446,1450]/atagt [1709,1713]/atagt [1918,1922]/gtagt [2248,2252]/atagt [2671,2675]/gtag [2951,2954]	ttttaat [3079,3085]/ttttaagt [3144,3151]	none	tttatct [1743,1749]
3HSAR000004039_CR000025310 590	gttagt [112,117]/attagt [241,246]/gtag [336,339]	ttttaaat [135,142]	none	tttgtct [125,131]
3HSAR000065497_CR001629589 521	none	none	none	none
3HSAR000016946_CR000103664 598	gtag [450,453]	ttttcat [316,322]	none	none
3HSAR000035512_CR000226371 653	gtttagt [292,298]	ttttat [125,130]/ttttaat [316,322]	none	none
3HSAR000000649_CR000004069 524	gtag [143,146]	ttttat [472,477]	none	none
3HSAR000048682_CR000722778 2493	atagt [330,334]/gtagt [613,617]/atagt [1270,1274]/atagt [1782,1786]/atagt [1888,1892]/atagt [2320,2324]	ttttat [80,85]/ttttat [386,391]/ttttat [400,405]/ttttat [622,627]/ttttat [662,667]/ttttat [881,886]/ttttat [919,924]/ttttat [1367,1372]/ttttat [1539,1544]/ttttat [1617,1622]/ttttat [1878,1883]/ttttat [2059,2064]/ttttat [2290,2295]/ttttat [2316,2321]	none	attgtct [2232,2238]
3HSAR000050766_CR000738306 503	gtag [116,119]	none	none	none
3HSAR000061359_CR001385475 1503	atagt [1069,1073]/gtag [1250,1253]	ttttat [359,364]/ttttat [613,618]/ttttat [708,713]	tgtatata [620,627]	tttatct [360,366]
3HSAR000039670_CR000257880 1010	atagt [73,77]/atagt [579,583]/gtagt [742,746]/gtag [865,868]	ttttaaat [403,410]	none	none
3HSAR000044534_CR000607602 136	none	none	none	none
3HSAR000061964_CR001389766 335	gttagt [260,265]	ttttat [117,122]	none	none
3HSAR000023867_CR000146059 873	atagt [22,26]/gtag [136,139]	none	none	none
3HSAR000043675_CR000600999 2647	gtagt [426,430]/atagt [517,521]/gtagt [543,547]/gtagt [644,648]/gtagt [732,736]/atagt [873,877]/atagt [1284,1288]/atagt [1562,1566]/gtagt [1678,1682]/atagt [1795,1799]/gtagt [2297,2301]/attagt [2477,2482]/gtag [2566,2569]	ttttat [653,658]/ttttat [1483,1488]/ttttat [2263,2268]/ttttat [2301,2306]/ttttat [2322,2327]/ttttaaat [2363,2370]	tgtaaata [1076,1083]	tttatct [942,948]/tttgtct [2464,2470]
3HSAR000042931_CR000595428 1195	gtagt [124,128]/gtagt [143,147]/atagt [570,574]/atagt [760,764]/gtagt [930,934]	ttttat [207,212]/ttttaagt [667,674]	tgtagata [416,423]	none
3HSAR000027259_CR000166807 2022	attagt [948,953]/gtag [1025,1028]	ttttat [1977,1982]	none	none
3HSAR000004100_CR000025685 854	atagt [118,122]/gtagt [455,459]/gtag [492,495]/gtag [813,816]	none	none	none
3HSAR000005573_CR000034718 847	none	none	none	none
3HSAR000061666_CR001387644 105	gtag [16,19]	ttttaat [35,41]	none	none
3HSAR000018876_CR000115553 3224	atagt [226,230]/atagt [259,263]/gtagt [2820,2824]/gtag [2855,2858]/gtag [2957,2960]	ttttat [294,299]/ttttat [521,526]/ttttat [1937,1942]/ttttat [1996,2001]/ttttat [2420,2425]/ttttat [3039,3044]	tgtatata [2283,2290]	attatct [1058,1064]/tttatct [1997,2003]/tttatct [3040,3046]
3HSAR000010200_CR000062365 1496	gtag [575,578]	none	none	none
3HSAR000012755_CR000077689 1382	gtagt [152,156]/atagt [557,561]/gtag [800,803]/gtag [863,866]/gtag [1220,1223]	ttttat [553,558]/ttttat [720,725]/ttttat [985,990]/ttttat [992,997]/ttttat [1233,1238]	tgtaaata [88,95]	none
3HSAR000047708_CR000715186 491	gtag [133,136]/gtag [151,154]	ttttact [278,284]	none	none
3HSAR000028834_CR000176332 1807	gtagt [1205,1209]/gtagt [1293,1297]	ttttat [1139,1144]/ttttcat [1521,1527]	none	none
3HSAR000027490_CR000168216 2480	gtagt [657,661]/gtagt [930,934]/atagt [2282,2286]/gtag [2347,2350]	ttttat [984,989]/ttttat [1707,1712]/ttttat [2414,2419]	none	none
3HSAR000005408_CR000033664 1172	atagt [449,453]/atagt [687,691]/atagt [703,707]/atagt [977,981]	ttttat [814,819]/ttttat [1094,1099]	tgtacata [405,412]	attatct [513,519]/tttgtct [1046,1052]
3HSAR000012140_CR000073969 703	gtagt [68,72]/gtagt [358,362]	none	none	none
3HSAR000051769_CR000745287 4439	atagt [252,256]/gtagt [2656,2660]/gtagt [4354,4358]/atagt [4404,4408]	ttttat [2752,2757]/ttttat [2772,2777]/ttttat [4383,4388]	tgtaaata [2613,2620]	none
3HSAR000027682_CR000169372 461	gtag [339,342]/gtag [410,413]	ttttaat [82,88]/ttttaat [354,360]/ttttcat [424,430]	none	none
3HSAR000052074_CR000747545 515	attagt [151,156]/gttagt [368,373]	ttttat [337,342]/ttttat [416,421]/ttttact [504,510]	none	attatct [389,395]/tttatct [417,423]
3HSAR000043510_CR000599850 1129	atagt [227,231]/atagt [235,239]/gtag [411,414]/gtag [846,849]/gtag [978,981]	ttttaat [257,263]/ttttact [1037,1043]	none	none
3HSAR000006167_CR000038353 4005	atagt [824,828]/atagt [1792,1796]/atagt [2728,2732]/atagt [3208,3212]/atagt [3714,3718]/atagt [3841,3845]	ttttat [140,145]/ttttat [2224,2229]/ttttat [2246,2251]/ttttat [2389,2394]/ttttat [2695,2700]/ttttat [2914,2919]/ttttat [3171,3176]	tgtagata [2037,2044]/tgtacata [2585,2592]/tgtaaata [3869,3876]	none
3HSAR000028537_CR000174538 2363	atagt [915,919]/gtagt [1109,1113]/atagt [1519,1523]	ttttat [911,916]/ttttat [943,948]/ttttat [1506,1511]	none	none
3HSAR000026092_CR000159684 140	none	none	none	none
3HSAR000035383_CR000225344 114	none	none	none	none
3HSAR000002170_CR000013577 1518	atagt [75,79]/atagt [833,837]/gtag [909,912]	ttttat [1316,1321]/ttttaat [1461,1467]/ttttaat [1484,1490]	none	none
3HSAR000038906_CR000252102 3117	gttagt [849,854]/gtag [1300,1303]/gtag [2112,2115]	ttttaagt [1876,1883]	none	none
3HSAR000066884_CR001716818 752	gtag [6,9]/gtag [546,549]/gtag [746,749]	ttttat [111,116]	none	tttgtct [157,163]
3HSAR000066451_CR001713338 171	none	ttttaaat [139,146]	none	none
3HSAR000036529_CR000235047 219	none	none	none	none
3HSAR000022835_CR000139792 175	none	none	none	none
3HSAR000046790_CR000637200 139	none	none	none	none
3HSAR000036852_CR000237430 701	atagt [187,191]/attagt [229,234]	ttttat [283,288]/ttttat [547,552]	tgtatata [337,344]	none
3HSAR000039541_CR000256882 791	atagt [171,175]/atagt [193,197]/gtttagt [374,380]/gtag [683,686]	ttttat [37,42]/ttttat [73,78]/ttttat [281,286]/ttttat [754,759]	none	tttatct [74,80]
3HSAR000055467_CR000799355 617	atagt [313,317]	ttttat [153,158]	tgtaaata [167,174]/tgtacata [328,335]/tgtaaata [352,359]	none
3HSAR000030942_CR000189235 2208	gtagt [514,518]/gtagt [1719,1723]/gtagt [1780,1784]/atagt [1963,1967]	ttttaaat [488,495]/ttttcat [549,555]	none	none
3HSAR000053657_CR000783107 246	none	none	none	none
3HSAR000064280_CR001406266 2214	atagt [296,300]/atagt [1448,1452]/atagt [1490,1494]/attagt [1885,1890]	ttttat [130,135]/ttttat [495,500]/ttttat [1497,1502]/ttttat [1511,1516]/ttttat [1776,1781]/ttttact [1901,1907]	tgtagata [655,662]	tttatct [1307,1313]
3HSAR000016429_CR000100466 400	atagt [337,341]	none	none	none
3HSAR000037851_CR000244497 314	none	none	none	none
3HSAR000042736_CR000593991 274	gtag [20,23]	none	tgtaaata [244,251]	none
3HSAR000043020_CR000596115 353	gtag [18,21]/gtag [36,39]	none	none	none
3HSAR000061304_CR001385082 1055	gtagt [801,805]/atagt [974,978]	ttttat [506,511]/ttttat [514,519]	tgtagata [956,963]	attatct [442,448]
3HSAR000032042_CR000195880 107	none	none	none	none
3HSAR000046947_CR000638333 481	none	none	tgtatata [144,151]	none
3HSAR000019347_CR000118443 1883	atagt [143,147]/gtttagt [1737,1743]	ttttat [432,437]/ttttat [1504,1509]	none	tttatct [276,282]/attgtct [1616,1622]
3HSAR000044780_CR000610358 362	atagt [87,91]/attagt [208,213]	none	none	tttgtct [130,136]
3HSAR000061518_CR001386582 43	none	none	none	none
3HSAR000047546_CR000713986 305	atttagt [150,156]	none	none	none
3HSAR000027901_CR000170670 1900	gtagt [949,953]/gtag [1865,1868]	ttttat [326,331]/ttttat [1190,1195]/ttttat [1263,1268]/ttttat [1873,1878]	tgtaaata [212,219]	tttgtct [885,891]/attgtct [919,925]/tttgtct [1457,1463]
3HSAR000040653_CR000372730 1363	atagt [925,929]/gtag [1140,1143]/gtag [1194,1197]	none	none	none
3HSAR000048484_CR000721214 1062	atagt [206,210]/atagt [381,385]	ttttaaat [200,207]	tgtaaata [1002,1009]	none
3HSAR000006867_CR000042637 175	gtag [123,126]	none	none	none
3HSAR000055668_CR000800820 1333	gtagt [139,143]/atagt [715,719]/atagt [1218,1222]/gtag [1258,1261]	ttttat [787,792]/ttttat [823,828]	none	none
3HSAR000064720_CR001409515 1115	gtagt [118,122]/gtagt [559,563]/gtag [1043,1046]	ttttat [851,856]/ttttcat [906,912]	none	none
3HSAR000020786_CR000127263 1589	gtagt [644,648]	ttttat [477,482]/ttttat [779,784]/ttttat [976,981]/ttttat [1012,1017]/ttttat [1059,1064]/ttttat [1499,1504]/ttttaat [1505,1511]	none	none
3HSAR000034862_CR000218295 1765	gttagt [741,746]/gtag [1216,1219]/gtag [1567,1570]	ttttat [570,575]/ttttat [696,701]/ttttat [1360,1365]/ttttat [1442,1447]/ttttaat [1492,1498]	tgtatata [1532,1539]/tgtaaata [1665,1672]	attgtct [1345,1351]
3HSAR000040920_CR000374733 147	none	none	none	none
3HSAR000022930_CR000140365 71	none	none	none	none
3HSAR000010720_CR000065487 4578	atagt [821,825]/atagt [1671,1675]/atagt [1682,1686]/gtagt [2770,2774]/gtagt [3250,3254]/atagt [4390,4394]	ttttat [29,34]/ttttat [1596,1601]/ttttat [4182,4187]	tgtacata [392,399]	attatct [4009,4015]
3HSAR000062213_CR001391555 2085	atagt [828,832]/gtag [1013,1016]/gtag [1955,1958]	ttttat [443,448]/ttttat [994,999]	none	none
3HSAR000040683_CR000372950 98	attagt [24,29]	none	none	none
3HSAR000040284_CR000267302 1400	gtag [71,74]/gtag [208,211]/gtag [744,747]/gtag [763,766]/gtag [909,912]	ttttat [1297,1302]/ttttat [1369,1374]	none	attgtct [618,624]
3HSAR000014932_CR000091150 1161	attagt [495,500]/gtag [507,510]/gtag [851,854]	ttttat [629,634]/ttttaagt [660,667]	none	tttatct [630,636]
3HSAR000061551_CR001386802 517	gtagt [109,113]/atagt [481,485]	ttttat [255,260]	none	tttatct [256,262]
3HSAR000043404_CR000599045 1413	atagt [80,84]/atagt [256,260]/atagt [460,464]/atagt [678,682]/atagt [697,701]/atagt [762,766]/atagt [863,867]/atagt [1335,1339]	ttttat [164,169]/ttttat [545,550]/ttttat [725,730]	tgtatata [991,998]	attgtct [293,299]/attatct [1023,1029]
3HSAR000021193_CR000129805 244	none	none	none	none
3HSAR000002118_CR000013224 1215	atagt [339,343]/atagt [500,504]/gtagt [896,900]/gtagt [1009,1013]/gtag [1053,1056]/gtag [1104,1107]/gtag [1116,1119]	ttttaaat [904,911]	none	none
3HSAR000026022_CR000159241 745	gtag [300,303]	ttttat [215,220]	none	none
3HSAR000004181_CR000026184 9	none	none	none	none
3HSAR000037050_CR000238836 319	gtagt [273,277]	ttttat [179,184]	none	none
3HSAR000036406_CR000234132 578	gtag [226,229]	ttttaaat [567,574]	none	none
3HSAR000009550_CR000058481 72	none	none	none	none
3HSAR000011683_CR000071205 678	none	ttttat [397,402]	tgtatata [406,413]	none
3HSAR000026431_CR000161751 231	none	none	none	none
3HSAR000028962_CR000177098 365	gtag [78,81]/gtag [149,152]	none	none	none
3HSAR000011682_CR000071198 519	attagt [258,263]	ttttat [511,516]	none	none
3HSAR000041663_CR000584489 116	none	none	none	none
3HSAR000041235_CR000533016 3501	gtagt [376,380]/gtagt [642,646]/gtagt [1059,1063]/gtagt [1583,1587]/atagt [2785,2789]/gtagt [2993,2997]/atagt [3007,3011]/atagt [3185,3189]/gtag [3337,3340]	ttttat [533,538]/ttttat [1370,1375]/ttttat [1829,1834]/ttttat [2679,2684]/ttttat [2865,2870]/ttttat [3039,3044]/ttttat [3092,3097]/ttttat [3148,3153]/ttttaaat [3209,3216]	none	attatct [2734,2740]
3HSAR000060407_CR001379197 3159	attagt [2976,2981]	ttttat [2817,2822]	none	attatct [147,153]
3HSAR000016221_CR000099159 1933	atagt [1446,1450]/gtag [1642,1645]/gtag [1694,1697]	ttttat [1823,1828]	none	none
3HSAR000066709_CR001714408 355	none	ttttat [256,261]/ttttcat [344,350]	none	none
3HSAR000024797_CR000151723 400	gtag [46,49]/gtag [152,155]	ttttat [98,103]	none	none
3HSAR000036895_CR000237724 136	none	none	none	none
3HSAR000022009_CR000134781 1488	atagt [371,375]/gtag [1320,1323]	ttttat [1283,1288]	none	attatct [257,263]
3HSAR000046392_CR000634507 4165	atagt [2141,2145]/atagt [2721,2725]/atagt [3089,3093]/atagt [3310,3314]/gtagt [3828,3832]/gtag [3922,3925]/gtag [4024,4027]	ttttat [1938,1943]/ttttat [3900,3905]	none	tttatct [2369,2375]/attatct [4085,4091]
3HSAR000013316_CR000081106 244	atagt [146,150]	ttttaat [141,147]	none	none
3HSAR000047034_CR000638954 8325	atagt [878,882]/atagt [917,921]/atagt [1243,1247]/gtagt [1930,1934]/gtagt [2299,2303]/gtagt [2866,2870]/atagt [3581,3585]/gtagt [4557,4561]/gtagt [4701,4705]/gtagt [5175,5179]/gtagt [5475,5479]/gtagt [5928,5932]/gtagt [5936,5940]/gtagt [6442,6446]/atagt [6466,6470]/gtag [6890,6893]/gtag [7438,7441]/gtag [7794,7797]/gtag [8029,8032]	ttttat [952,957]/ttttat [5531,5536]/ttttaaat [6325,6332]/ttttcat [7331,7337]	tgtaaata [8114,8121]	tttgtct [1773,1779]/tttgtct [3373,3379]/tttgtct [3571,3577]/tttatct [7871,7877]
3HSAR000066408_CR001713147 2945	atagt [873,877]/gtag [1717,1720]	none	none	none
3HSAR000046543_CR000635492 3007	gtagt [594,598]/gtagt [895,899]/gtagt [1635,1639]/gtagt [1714,1718]/gttagt [1846,1851]	ttttat [286,291]/ttttat [578,583]/ttttat [2862,2867]	tgtatata [983,990]	none
3HSAR000021018_CR000128712 451	none	none	none	none
3HSAR000036841_CR000237349 2859	gtagt [346,350]/atagt [444,448]/atagt [1252,1256]/gtagt [1473,1477]/atagt [1555,1559]/atagt [2047,2051]/atagt [2072,2076]/gtagt [2078,2082]/atagt [2138,2142]/atagt [2512,2516]/atttagt [2719,2725]	ttttat [241,246]/ttttat [724,729]/ttttat [738,743]/ttttat [748,753]/ttttat [1088,1093]/ttttat [1122,1127]/ttttat [1514,1519]/ttttat [1715,1720]/ttttat [1723,1728]/ttttat [2068,2073]/ttttat [2298,2303]/ttttaaat [2617,2624]/ttttact [2658,2664]	tgtaaata [1247,1254]	tttgtct [299,305]/tttatct [448,454]/tttgtct [1135,1141]/tttgtct [1654,1660]
3HSAR000022870_CR000139999 2264	atagt [162,166]/gtagt [284,288]/gtagt [610,614]/atagt [1516,1520]/gtag [1558,1561]/gtag [1871,1874]/gtag [1931,1934]	ttttat [37,42]/ttttat [99,104]/ttttat [246,251]/ttttat [1074,1079]/ttttat [1386,1391]/ttttat [1725,1730]/ttttat [1739,1744]/ttttat [2198,2203]	none	tttatct [38,44]/tttatct [238,244]/attatct [250,256]/attatct [2185,2191]
3HSAR000006533_CR000040618 511	atagt [349,353]/atagt [387,391]	ttttat [319,324]/ttttat [445,450]	none	none
3HSAR000004059_CR000025430 274	none	none	none	none
3HSAR000044980_CR000624462 836	gtagt [646,650]	ttttat [315,320]/ttttat [326,331]/ttttaat [756,762]	none	none
3HSAR000041004_CR000531284 361	atagt [175,179]	none	none	none
3HSAR000049249_CR000727097 544	gtag [207,210]	none	none	none
3HSAR000005786_CR000035998 1489	gtagt [1236,1240]/gtagt [1311,1315]	ttttat [64,69]	none	none
3HSAR000013344_CR000081275 1415	gtagt [246,250]/atagt [962,966]/gtag [1094,1097]	ttttat [1113,1118]	none	tttgtct [980,986]
3HSAR000001434_CR000008908 899	atagt [132,136]/gtag [174,177]/gtag [655,658]/gtag [677,680]/gtag [710,713]	none	none	tttgtct [361,367]
3HSAR000005232_CR000032597 1221	gtagt [318,322]/atagt [668,672]/gtag [675,678]	ttttaaat [267,274]/ttttaaat [781,788]	tgtatata [132,139]/tgtagata [674,681]	none
3HSAR000020403_CR000124889 6413	atagt [585,589]/atagt [609,613]/gtagt [794,798]/gtagt [2010,2014]/atagt [3610,3614]/atagt [3891,3895]/atagt [4386,4390]/atagt [5385,5389]/gtagt [6317,6321]	ttttat [2151,2156]/ttttat [4277,4282]/ttttat [5448,5453]/ttttat [5459,5464]/ttttat [5635,5640]/ttttaat [5918,5924]	none	attatct [104,110]/tttatct [3254,3260]
3HSAR000059409_CR001372998 167	atagt [81,85]	ttttat [68,73]	none	none
3HSAR000046361_CR000634286 600	gtag [336,339]	none	none	none
3HSAR000008828_CR000054158 233	atagt [14,18]/gtag [169,172]	ttttat [192,197]/ttttaaat [219,226]	none	none
3HSAR000061990_CR001389945 3136	gtagt [237,241]/gtag [1976,1979]/gtag [2158,2161]	none	tgtaaata [896,903]	none
3HSAR000058650_CR001367720 576	atagt [119,123]/atagt [464,468]	ttttat [191,196]/ttttaat [377,383]	tgtaaata [385,392]	tttgtct [18,24]/tttgtct [205,211]
3HSAR000042483_CR000592024 1177	atagt [308,312]/gtagt [751,755]/gtagt [819,823]/atagt [1093,1097]	ttttat [172,177]/ttttat [269,274]/ttttat [842,847]/ttttaat [902,908]/ttttcat [1088,1094]	none	tttatct [851,857]/attatct [1070,1076]
3HSAR000061909_CR001389387 1236	atagt [576,580]/gtagt [724,728]/gtagt [874,878]/gtagt [1046,1050]/gtagt [1168,1172]	none	none	none
3HSAR000042238_CR000590117 1093	atagt [592,596]/gtag [796,799]	none	none	tttatct [105,111]/attgtct [1079,1085]
3HSAR000063765_CR001402569 301	atagt [182,186]	ttttat [40,45]/ttttat [170,175]/ttttat [190,195]	none	none
3HSAR000021148_CR000129528 76	none	none	none	none
3HSAR000056153_CR001224833 581	none	none	tgtacata [130,137]	none
3HSAR000059867_CR001375915 87	none	none	none	none
3HSAR000049666_CR000730101 2316	atagt [337,341]/atagt [437,441]/gtagt [459,463]/gtagt [524,528]/atagt [1188,1192]/gtagt [1478,1482]/atagt [1910,1914]/atagt [2082,2086]	ttttat [654,659]/ttttat [852,857]/ttttat [1333,1338]/ttttat [1932,1937]/ttttat [2018,2023]	tgtatata [107,114]/tgtacata [417,424]/tgtatata [965,972]/tgtaaata [2234,2241]	attatct [804,810]/attgtct [1237,1243]
3HSAR000035193_CR000220735 680	gtagt [418,422]	none	none	none
3HSAR000019279_CR000118028 657	atagt [111,115]/gtag [168,171]	none	none	none
3HSAR000048226_CR000719208 669	none	none	none	none
3HSAR000032793_CR000200688 815	atagt [643,647]	none	tgtaaata [431,438]	none
3HSAR000001301_CR000008075 38	none	none	none	none
3HSAR000003290_CR000020734 2354	atagt [347,351]/gtagt [869,873]/atagt [1310,1314]/atagt [1475,1479]/atagt [1699,1703]/atagt [2108,2112]/atttagt [2292,2298]	ttttat [314,319]/ttttat [511,516]/ttttat [1035,1040]/ttttat [1226,1231]/ttttat [2264,2269]/ttttat [2330,2335]	tgtatata [2103,2110]/tgtaaata [2144,2151]	attgtct [1831,1837]/attgtct [1871,1877]
3HSAR000060428_CR001379345 330	none	ttttaaat [288,295]	none	attgtct [201,207]
3HSAR000066503_CR001713549 3309	atagt [2043,2047]/atagt [2466,2470]/gtag [2800,2803]	ttttat [1144,1149]/ttttat [2010,2015]/ttttat [2894,2899]/ttttat [3143,3148]/ttttaaat [3168,3175]	tgtacata [2250,2257]/tgtaaata [2754,2761]/tgtacata [2872,2879]	none
3HSAR000014427_CR000088058 1519	atagt [196,200]/gtagt [560,564]/gtagt [949,953]/gtag [1394,1397]/gtag [1486,1489]	ttttat [442,447]/ttttat [974,979]	tgtaaata [894,901]/tgtaaata [1071,1078]	attgtct [296,302]
3HSAR000034086_CR000211883 504	atagt [180,184]/atagt [368,372]	none	none	none
3HSAR000006376_CR000039652 324	none	none	none	none
3HSAR000013600_CR000082884 1469	gtagt [292,296]/gtag [358,361]/gtag [677,680]/gtag [877,880]	ttttat [1380,1385]/ttttat [1400,1405]	tgtaaata [1248,1255]	none
3HSAR000011721_CR000071441 2259	atagt [129,133]/gtagt [436,440]/atagt [1723,1727]/atagt [2087,2091]	ttttat [1512,1517]	tgtagata [1519,1526]/tgtaaata [1539,1546]	attgtct [916,922]/tttatct [2056,2062]
3HSAR000060325_CR001378621 274	none	ttttat [257,262]	none	none
3HSAR000030870_CR000188806 500	gtagt [81,85]	none	none	none
3HSAR000011615_CR000070817 1086	atagt [699,703]	ttttat [326,331]/ttttcat [939,945]	none	none
3HSAR000024117_CR000147573 3458	atagt [3314,3318]	ttttat [918,923]/ttttat [3206,3211]	none	attatct [1583,1589]
3HSAR000015557_CR000095036 159	none	none	none	none
3HSAR000013483_CR000082152 48	none	none	none	none
3HSAR000018620_CR000113991 987	none	none	none	none
3HSAR000042353_CR000591046 1339	atagt [368,372]/atagt [780,784]/atagt [814,818]/attagt [1334,1339]	ttttat [12,17]/ttttat [173,178]/ttttat [761,766]/ttttat [810,815]/ttttat [1016,1021]/ttttat [1053,1058]/ttttaat [1118,1124]	none	none
3HSAR000017378_CR000106347 3655	atagt [198,202]/gtagt [340,344]/atagt [776,780]/atagt [1358,1362]/atagt [1412,1416]/atagt [2055,2059]/atagt [2134,2138]/atagt [2278,2282]/attagt [3152,3157]/attagt [3464,3469]	ttttat [194,199]/ttttat [3141,3146]/ttttat [3641,3646]	tgtatata [1538,1545]	attatct [457,463]
3HSAR000010812_CR000066037 408	gtagt [239,243]/atagt [314,318]	ttttat [91,96]/ttttaat [331,337]	none	none
3HSAR000059899_CR001376093 922	atagt [840,844]/atagt [907,911]	none	none	attgtct [292,298]
3HSAR000062573_CR001394084 1082	gtagt [531,535]	ttttat [441,446]/ttttat [515,520]/ttttat [797,802]/ttttat [833,838]/ttttaat [942,948]	none	none
3HSAR000045241_CR000625657 199	none	none	none	none
3HSAR000052729_CR000752399 1392	atagt [1045,1049]/gttagt [1088,1093]	ttttat [718,723]/ttttat [1212,1217]/ttttat [1222,1227]/ttttat [1254,1259]	none	attgtct [449,455]
3HSAR000027118_CR000165955 487	atagt [94,98]/gtag [320,323]	ttttaat [302,308]	none	none
3HSAR000041927_CR000586976 5486	atagt [2918,2922]/gtagt [4572,4576]/attagt [4783,4788]	ttttat [4648,4653]/ttttaat [5237,5243]	none	attatct [1683,1689]/tttatct [2942,2948]
3HSAR000048701_CR000722927 1092	atagt [98,102]/gtagt [394,398]/gtagt [963,967]	ttttcat [760,766]/ttttcat [985,991]	none	tttgtct [1009,1015]
3HSAR000012930_CR000078761 143	atagt [53,57]	ttttat [49,54]	none	none
3HSAR000062963_CR001396884 35	none	none	none	none
3HSAR000029668_CR000181399 2066	atagt [47,51]/gtagt [400,404]/gtagt [1027,1031]/gtagt [1379,1383]/atagt [1702,1706]/atagt [1811,1815]/gtagt [1850,1854]	ttttat [250,255]/ttttat [1932,1937]	none	attgtct [303,309]
3HSAR000036008_CR000231259 153	atagt [30,34]	none	none	attatct [88,94]
3HSAR000046159_CR000632788 539	atagt [234,238]/gtag [305,308]	none	none	none
3HSAR000001376_CR000008548 4285	atagt [122,126]/gtagt [376,380]/gtagt [929,933]/gtagt [1450,1454]/atagt [1488,1492]/atagt [1960,1964]/atagt [2543,2547]/atagt [2702,2706]/gtagt [2808,2812]/gtag [2896,2899]/gtag [3622,3625]	ttttat [546,551]/ttttat [815,820]/ttttat [958,963]/ttttat [1058,1063]/ttttat [1296,1301]/ttttat [1898,1903]/ttttat [2133,2138]/ttttat [2531,2536]/ttttat [3872,3877]	tgtagata [1454,1461]/tgtaaata [1815,1822]	attatct [208,214]/tttatct [564,570]/attgtct [4079,4085]
3HSAR000024614_CR000150605 207	none	none	tgtatata [179,186]	none
3HSAR000013801_CR000084170 786	gtagt [426,430]	ttttat [161,166]/ttttat [477,482]/ttttaaat [614,621]	none	attgtct [649,655]
3HSAR000046875_CR000637777 64	gtag [10,13]	none	none	none
3HSAR000048015_CR000717715 239	none	none	none	none
3HSAR000028370_CR000173528 171	gtag [102,105]	none	none	none
3HSAR000041933_CR000587027 1897	gtagt [1212,1216]/gtagt [1776,1780]/gtagt [1831,1835]	none	none	none
3HSAR000064833_CR001410361 676	attagt [379,384]	none	none	none
3HSAR000012386_CR000075445 63	none	none	none	none
3HSAR000031092_CR000190121 738	none	none	none	none
3HSAR000003657_CR000022991 150	gtag [126,129]	none	none	none
3HSAR000046823_CR000637409 4983	gtagt [760,764]/gtagt [1211,1215]/atagt [1319,1323]/gtagt [1379,1383]/atagt [1817,1821]/atagt [2046,2050]/gtagt [4076,4080]/atagt [4384,4388]/gtag [4443,4446]/gtag [4625,4628]	ttttat [1516,1521]/ttttat [2331,2336]/ttttat [2715,2720]/ttttat [2850,2855]/ttttat [3569,3574]/ttttat [3868,3873]/ttttat [4189,4194]/ttttat [4708,4713]/ttttat [4836,4841]/ttttact [4869,4875]	tgtatata [2669,2676]/tgtatata [4364,4371]/tgtacata [4878,4885]	attatct [2854,2860]/tttgtct [2925,2931]/tttgtct [3645,3651]/attatct [4735,4741]
3HSAR000011149_CR000068017 1571	gtagt [1493,1497]	ttttat [962,967]/ttttaat [1554,1560]	tgtatata [30,37]	none
3HSAR000050321_CR000734981 2117	atagt [76,80]/atagt [264,268]/gtagt [397,401]/atagt [855,859]/gtagt [1268,1272]/gtag [1351,1354]	ttttat [147,152]/ttttat [238,243]/ttttat [648,653]/ttttat [981,986]/ttttat [2028,2033]	none	tttgtct [15,21]/tttatct [1669,1675]/attgtct [1711,1717]
3HSAR000055523_CR000799801 2187	atagt [586,590]/gtagt [938,942]/gtagt [2005,2009]/gtag [2020,2023]	ttttat [270,275]/ttttat [606,611]/ttttaat [1819,1825]	none	attatct [1578,1584]
3HSAR000052529_CR000750963 300	none	none	none	none
3HSAR000003133_CR000019762 1901	gtagt [1429,1433]/attagt [1601,1606]/gtag [1813,1816]	ttttat [543,548]/ttttat [1719,1724]	none	attgtct [1565,1571]/tttatct [1661,1667]
3HSAR000021837_CR000133760 2906	atagt [405,409]/atagt [433,437]/gtagt [447,451]/gtagt [1047,1051]/atagt [1236,1240]/attagt [1447,1452]/gtttagt [1728,1734]/gtag [2867,2870]	ttttat [2660,2665]	none	attgtct [1249,1255]/attatct [1937,1943]
3HSAR000035558_CR000226708 1602	atagt [132,136]/atagt [170,174]/atagt [595,599]/attagt [643,648]/atttagt [673,679]	ttttat [85,90]/ttttat [405,410]/ttttat [889,894]/ttttat [1306,1311]/ttttat [1461,1466]	none	none
3HSAR000020173_CR000123450 2173	atagt [588,592]/atagt [733,737]/gtag [1165,1168]/gtag [1636,1639]	ttttat [129,134]/ttttat [260,265]/ttttat [471,476]/ttttat [913,918]/ttttat [1034,1039]/ttttat [1179,1184]	none	tttatct [261,267]
3HSAR000028915_CR000176811 1223	atagt [207,211]/gtagt [707,711]/gtttagt [1046,1052]/gtag [1185,1188]	ttttat [942,947]	tgtacata [202,209]	attatct [69,75]
3HSAR000046499_CR000635212 1547	gtag [1038,1041]/gtag [1440,1443]	ttttat [273,278]/ttttat [963,968]/ttttaat [1520,1526]	tgtaaata [221,228]	none
3HSAR000020386_CR000124782 354	none	none	none	none
3HSAR000060882_CR001382125 3941	gtagt [525,529]/atagt [1000,1004]/atagt [1790,1794]/gtagt [3162,3166]/gtag [3736,3739]	ttttat [665,670]/ttttat [684,689]/ttttaat [2131,2137]/ttttact [2164,2170]/ttttact [3206,3212]/ttttcat [3692,3698]	tgtaaata [3639,3646]	tttatct [2643,2649]/attatct [2861,2867]/attatct [3893,3899]
3HSAR000019129_CR000117118 6231	gtagt [1786,1790]/gtagt [3204,3208]/attagt [3419,3424]/gtag [4144,4147]/gtag [4456,4459]/gtag [4575,4578]	ttttat [139,144]/ttttat [190,195]/ttttat [1308,1313]/ttttat [3714,3719]/ttttat [4444,4449]/ttttat [4655,4660]/ttttaat [5716,5722]	tgtaaata [6139,6146]	attatct [259,265]/tttatct [1179,1185]/attgtct [3729,3735]/tttgtct [3736,3742]/attgtct [6186,6192]
3HSAR000005223_CR000032544 698	gtag [60,63]/gtag [188,191]/gtag [581,584]	none	none	none
3HSAR000038474_CR000248858 1087	attagt [476,481]	none	none	none
3HSAR000019898_CR000121742 563	atagt [174,178]/atagt [467,471]/attagt [513,518]	ttttaat [301,307]/ttttcat [432,438]	none	none
3HSAR000057195_CR001252554 329	atttagt [56,62]/gtag [115,118]	none	none	none
3HSAR000001409_CR000008748 2132	atagt [396,400]/atagt [1091,1095]/atagt [1670,1674]/gtagt [1983,1987]	ttttat [258,263]/ttttat [308,313]/ttttat [1625,1630]	tgtaaata [424,431]/tgtatata [1257,1264]	tttgtct [756,762]/tttgtct [901,907]/attatct [1379,1385]
3HSAR000062728_CR001395268 1792	gtag [321,324]/gtag [1774,1777]	none	tgtaaata [1663,1670]	none
3HSAR000042090_CR000588725 2201	gtag [265,268]/gtag [871,874]/gtag [1621,1624]/gtag [2075,2078]/gtag [2147,2150]	ttttat [459,464]	none	none
3HSAR000066600_CR001713969 68	none	none	none	none
3HSAR000063423_CR001400175 4382	gtagt [1665,1669]/gtag [1941,1944]/gtag [2355,2358]	ttttat [1135,1140]/ttttat [3477,3482]/ttttaat [4361,4367]	tgtatata [2129,2136]	none
3HSAR000037447_CR000241665 1121	gtagt [867,871]/atagt [1040,1044]	ttttat [15,20]/ttttat [572,577]/ttttat [580,585]	tgtagata [1022,1029]	attatct [508,514]
3HSAR000010587_CR000064700 140	none	none	none	none
3HSAR000009616_CR000058875 95	none	ttttact [49,55]	none	none
3HSAR000031143_CR000190429 131	gtag [118,121]	none	none	none
3HSAR000019817_CR000121231 1730	gtagt [1333,1337]	ttttat [782,787]/ttttat [1181,1186]	none	attatct [400,406]/tttgtct [529,535]/attatct [993,999]
3HSAR000026265_CR000160736 1195	gtagt [574,578]/gtag [954,957]	ttttat [383,388]	none	none
3HSAR000066128_CR001634061 642	attagt [478,483]/gttagt [532,537]/gtag [557,560]	ttttat [259,264]	tgtagata [556,563]	none
3HSAR000030790_CR000188317 412	none	none	none	none
3HSAR000036218_CR000232753 3259	gtagt [507,511]/atagt [622,626]/atagt [1313,1317]/gtagt [1525,1529]/atagt [3078,3082]	ttttat [299,304]/ttttat [492,497]/ttttat [626,631]/ttttat [1647,1652]/ttttaaat [1939,1946]/ttttcat [3090,3096]	tgtacata [738,745]	attgtct [514,520]/attgtct [1159,1165]/attgtct [2502,2508]
3HSAR000010441_CR000063813 332	none	ttttaaat [123,130]	none	tttatct [72,78]
3HSAR000007323_CR000045367 597	gtttagt [572,578]	ttttat [144,149]	tgtaaata [126,133]	none
3HSAR000023266_CR000142405 1760	gtag [835,838]/gtag [887,890]/gtag [1048,1051]	ttttat [708,713]/ttttat [714,719]	none	attatct [1517,1523]/tttgtct [1740,1746]
3HSAR000008456_CR000051905 5125	atagt [79,83]/gtagt [724,728]/gtagt [955,959]/atagt [1072,1076]/gtagt [1796,1800]/atagt [1847,1851]/gtagt [2983,2987]/atagt [3776,3780]/atagt [4165,4169]/atagt [4386,4390]/atagt [4484,4488]/atagt [4991,4995]	ttttat [242,247]/ttttat [557,562]/ttttat [852,857]/ttttat [2834,2839]/ttttat [2893,2898]/ttttat [3321,3326]/ttttat [4125,4130]/ttttat [4190,4195]/ttttat [4235,4240]/ttttat [4637,4642]	tgtagata [176,183]/tgtatata [4541,4548]/tgtacata [4577,4584]	tttatct [599,605]/tttgtct [2474,2480]/tttatct [3530,3536]
3HSAR000063419_CR001400146 590	gtagt [146,150]	none	none	none
3HSAR000004479_CR000028028 499	none	ttttcat [85,91]	none	none
3HSAR000059092_CR001370771 468	gtag [232,235]	none	none	none
3HSAR000065320_CR001627517 1194	atagt [33,37]/attagt [675,680]/gttagt [1115,1120]	none	none	attgtct [1098,1104]
3HSAR000062057_CR001390419 187	none	ttttat [159,164]	none	none
3HSAR000058434_CR001261791 1887	gtagt [9,13]/atagt [221,225]/atagt [531,535]/atagt [739,743]/gtagt [855,859]/atagt [1313,1317]/gtagt [1430,1434]/atagt [1489,1493]/atagt [1764,1768]	ttttat [33,38]/ttttat [170,175]/ttttat [480,485]/ttttat [941,946]/ttttat [1062,1067]/ttttat [1506,1511]/ttttat [1716,1721]/ttttat [1732,1737]/ttttat [1755,1760]/ttttat [1872,1877]	tgtaaata [216,223]/tgtagata [340,347]/tgtatata [355,362]/tgtaaata [869,876]	attatct [278,284]/tttgtct [1218,1224]
3HSAR000032925_CR000202622 979	gtag [219,222]/gtag [497,500]/gtag [857,860]	ttttat [744,749]	tgtaaata [948,955]	none
3HSAR000049373_CR000727992 1280	atagt [159,163]/atagt [730,734]/atagt [873,877]	ttttat [150,155]/ttttat [209,214]/ttttat [524,529]/ttttat [1021,1026]/ttttaaat [1152,1159]	none	tttatct [48,54]/attatct [111,117]/tttgtct [475,481]
3HSAR000050406_CR000735614 1065	atagt [194,198]/atagt [442,446]/atagt [762,766]	ttttat [572,577]/ttttat [596,601]	none	none
3HSAR000053948_CR000786602 1233	none	ttttaaat [467,474]	none	none
3HSAR000062066_CR001390482 438	none	none	none	none
3HSAR000066040_CR001633549 610	attagt [133,138]/gtag [187,190]/gtag [503,506]/gtag [516,519]	ttttaat [539,545]	none	none
3HSAR000008538_CR000052397 2104	atagt [1655,1659]/gtag [1710,1713]/gtag [1792,1795]	ttttat [791,796]/ttttat [841,846]/ttttat [1017,1022]/ttttat [1050,1055]/ttttat [1279,1284]/ttttat [1451,1456]	tgtacata [1518,1525]/tgtacata [1727,1734]	tttatct [846,852]
3HSAR000000919_CR000005708 827	gtag [567,570]/gtag [751,754]	none	none	none
3HSAR000066213_CR001634525 369	gtagt [106,110]	ttttat [177,182]/ttttat [353,358]	none	none
3HSAR000019568_CR000119750 498	none	ttttat [233,238]	none	none
3HSAR000024465_CR000149679 21	atttagt [3,9]	none	none	none
3HSAR000001799_CR000011158 3193	gtagt [392,396]/gtagt [707,711]/atagt [909,913]/gttagt [1330,1335]/atttagt [1411,1417]/atttagt [2083,2089]/gtag [2161,2164]/gtag [2177,2180]/gtag [2400,2403]/gtag [3111,3114]	ttttat [315,320]/ttttat [664,669]/ttttat [1496,1501]/ttttat [2652,2657]/ttttaat [3142,3148]	tgtatata [1616,1623]	attgtct [193,199]/tttatct [1497,1503]/attgtct [2645,2651]/tttatct [2653,2659]
3HSAR000010916_CR000066662 655	gtag [424,427]	ttttaat [646,652]	none	none
3HSAR000012129_CR000073905 1408	gtagt [297,301]/atagt [808,812]/gtag [1067,1070]/gtag [1243,1246]	ttttat [501,506]/ttttat [921,926]	none	attgtct [673,679]
3HSAR000035743_CR000228405 43	none	none	none	none
3HSAR000026341_CR000161211 535	gtagt [167,171]	none	none	none
3HSAR000039408_CR000255839 857	atagt [237,241]/gtag [709,712]	ttttat [301,306]/ttttat [509,514]	none	none
3HSAR000048202_CR000719041 2084	atagt [269,273]/gtagt [1016,1020]/gtagt [1616,1620]	ttttat [37,42]/ttttat [265,270]/ttttaat [1327,1333]	none	none
3HSAR000018914_CR000115793 178	none	ttttaat [80,86]/ttttaaat [146,153]	none	none
3HSAR000043475_CR000599613 57	none	none	none	none
3HSAR000022312_CR000136609 1156	gtagt [226,230]/gtag [359,362]/gtag [615,618]	ttttat [255,260]/ttttact [277,283]	none	none
3HSAR000045733_CR000629088 2682	atagt [1486,1490]/gtagt [1734,1738]/gtag [1751,1754]/gtag [1824,1827]/gtag [1880,1883]/gtag [2421,2424]	ttttat [485,490]/ttttat [538,543]/ttttat [1102,1107]/ttttat [1662,1667]/ttttat [1703,1708]/ttttat [1851,1856]/ttttat [2146,2151]/ttttat [2546,2551]/ttttat [2598,2603]/ttttat [2610,2615]	tgtatata [508,515]	attgtct [88,94]/attgtct [475,481]/tttgtct [1650,1656]/attatct [1985,1991]
3HSAR000028778_CR000175996 3321	atagt [1161,1165]/atagt [1398,1402]/atagt [1569,1573]/atagt [2372,2376]/atagt [2641,2645]/gtagt [3093,3097]	ttttat [2102,2107]/ttttat [2330,2335]/ttttat [2977,2982]/ttttact [3072,3078]/ttttcat [3223,3229]	none	tttatct [155,161]
3HSAR000001940_CR000012073 380	gtag [261,264]	none	none	none
3HSAR000043818_CR000602065 343	none	none	none	none
3HSAR000043641_CR000600754 1647	gtagt [862,866]/gtag [1056,1059]/gtag [1568,1571]	ttttat [388,393]/ttttat [1048,1053]/ttttaat [1122,1128]/ttttaat [1457,1463]	tgtacata [1242,1249]	attatct [526,532]
3HSAR000057352_CR001253612 201	gtagt [75,79]/atagt [164,168]	none	none	tttgtct [4,10]
3HSAR000028433_CR000173890 389	gtagt [246,250]	none	none	attatct [35,41]
3HSAR000029452_CR000180071 2727	gtag [503,506]/gtag [1633,1636]/gtag [1757,1760]/gtag [1983,1986]	ttttat [806,811]/ttttat [2682,2687]	tgtagata [1632,1639]	none
3HSAR000027111_CR000165914 77	none	none	tgtaaata [46,53]	none
3HSAR000058060_CR001258953 2799	atagt [716,720]/atagt [1192,1196]/gtagt [1365,1369]/gtagt [1861,1865]/attagt [2402,2407]	ttttat [2564,2569]	tgtatata [2453,2460]	tttgtct [1690,1696]
3HSAR000022502_CR000137769 432	none	none	none	none
3HSAR000006198_CR000038550 217	gtagt [8,12]/gtagt [54,58]	none	none	tttgtct [154,160]
3HSAR000028003_CR000171292 165	none	none	none	none
3HSAR000056170_CR001224946 1037	gtagt [161,165]/atagt [442,446]/gttagt [562,567]	ttttat [482,487]/ttttat [824,829]/ttttat [1007,1012]	tgtatata [217,224]	none
3HSAR000054406_CR000791000 944	gtag [339,342]/gtag [351,354]	ttttaaat [366,373]	none	none
3HSAR000057956_CR001258153 5380	gtagt [76,80]/gtagt [159,163]/atagt [374,378]/gtagt [442,446]/gtagt [511,515]/atagt [821,825]/atagt [1263,1267]/gtagt [1289,1293]/atagt [2375,2379]/atagt [3189,3193]/gtagt [3305,3309]/gtagt [3475,3479]/atagt [3687,3691]/gtagt [3902,3906]/gtagt [4261,4265]/gtagt [4757,4761]/atagt [5038,5042]	ttttat [546,551]/ttttat [765,770]/ttttat [1396,1401]/ttttat [2327,2332]/ttttat [3422,3427]/ttttat [4557,4562]/ttttaat [5139,5145]/ttttcat [5335,5341]	tgtaaata [218,225]/tgtaaata [367,374]	none
3HSAR000025902_CR000158517 453	atagt [348,352]	ttttcat [4,10]	none	none
3HSAR000014660_CR000089479 3286	atagt [300,304]/gtagt [1054,1058]/gtagt [1495,1499]/atagt [2126,2130]/atagt [2246,2250]/attagt [2271,2276]/atttagt [2508,2514]	ttttat [26,31]/ttttat [2531,2536]/ttttat [2829,2834]/ttttaat [2972,2978]	tgtaaata [2717,2724]/tgtacata [3245,3252]	tttgtct [1484,1490]/tttgtct [2495,2501]/tttatct [3014,3020]
3HSAR000063179_CR001398414 1152	atagt [232,236]/gtagt [710,714]/gtagt [885,889]/gtagt [1070,1074]	ttttaagt [313,320]/ttttact [1075,1081]	none	none
3HSAR000059803_CR001375575 2648	atagt [268,272]/gtagt [1491,1495]/gtagt [1895,1899]	ttttat [1071,1076]/ttttat [2458,2463]/ttttat [2485,2490]/ttttat [2497,2502]/ttttcat [2523,2529]	none	none
3HSAR000007021_CR000043596 211	gtagt [16,20]	none	none	none
3HSAR000036711_CR000236377 772	atttagt [657,663]	none	none	tttatct [444,450]
3HSAR000037603_CR000242752 701	atagt [348,352]	ttttact [689,695]	none	none
3HSAR000026828_CR000164201 4007	gtagt [1022,1026]/gtagt [1699,1703]/gtagt [2546,2550]/gttagt [3437,3442]/gtag [3891,3894]	ttttcat [1431,1437]	none	attatct [2085,2091]
3HSAR000066375_CR001713007 1540	gtag [403,406]/gtag [1311,1314]	ttttact [919,925]	none	none
3HSAR000027743_CR000169730 157	none	none	none	none
3HSAR000020049_CR000122671 2060	gtagt [1409,1413]/atagt [1895,1899]/gtag [1914,1917]	ttttat [1307,1312]/ttttat [1723,1728]/ttttat [1858,1863]	none	tttgtct [1142,1148]
3HSAR000056298_CR001225900 343	none	none	none	none
3HSAR000064109_CR001405048 1114	attagt [681,686]/gtag [903,906]	none	none	none
3HSAR000038534_CR000249284 505	gttagt [145,150]	ttttat [382,387]	none	none
3HSAR000049913_CR000731988 1792	atagt [1369,1373]	ttttat [1384,1389]/ttttaat [1392,1398]/ttttaat [1603,1609]	tgtacata [397,404]	tttatct [839,845]/tttgtct [1143,1149]/attgtct [1480,1486]
3HSAR000055510_CR000799709 386	gtag [348,351]	none	none	none
3HSAR000057750_CR001256566 555	gtagt [325,329]/gtag [441,444]/gtag [446,449]	ttttat [260,265]/ttttat [472,477]	none	none
3HSAR000024706_CR000151173 1696	gtagt [876,880]/gtag [1274,1277]	none	none	none
3HSAR000002845_CR000017919 322	none	none	none	none
3HSAR000003567_CR000022453 2870	atagt [331,335]/atagt [438,442]/gtagt [1024,1028]/gtagt [1099,1103]/atagt [1234,1238]/atagt [1365,1369]/atagt [2129,2133]/gtag [2428,2431]/gtag [2557,2560]	ttttat [470,475]/ttttat [1165,1170]/ttttat [1291,1296]/ttttat [1332,1337]/ttttat [1356,1361]/ttttat [1966,1971]/ttttact [2060,2066]	tgtatata [425,432]/tgtatata [685,692]	tttatct [1166,1172]/tttatct [1292,1298]/attatct [2399,2405]/tttgtct [2733,2739]
3HSAR000013950_CR000085091 1064	gtagt [290,294]	ttttaat [651,657]/ttttaat [811,817]/ttttcat [824,830]	none	none
3HSAR000006967_CR000043260 2691	gtagt [1609,1613]/atagt [2049,2053]/gtagt [2060,2064]/atagt [2323,2327]/atagt [2512,2516]/atagt [2685,2689]	ttttat [819,824]/ttttat [1284,1289]/ttttaat [2105,2111]/ttttaat [2493,2499]	tgtaaata [326,333]	tttgtct [1814,1820]/attatct [2110,2116]/attatct [2293,2299]
3HSAR000008434_CR000051764 1773	gtagt [260,264]/atagt [1092,1096]/gtagt [1533,1537]/atagt [1581,1585]	ttttat [160,165]/ttttat [597,602]/ttttat [1757,1762]	tgtatata [935,942]	none
3HSAR000016473_CR000100726 641	gtag [43,46]/gtag [283,286]	none	none	none
3HSAR000001149_CR000007129 573	atagt [380,384]/gtag [524,527]	ttttat [196,201]	none	tttgtct [364,370]
3HSAR000002789_CR000017555 1657	gtagt [1595,1599]	none	none	attatct [149,155]/attatct [1525,1531]
3HSAR000044346_CR000606092 975	gtag [909,912]	ttttat [924,929]	none	none
3HSAR000060589_CR001380399 4879	gtagt [165,169]/gtagt [930,934]/atagt [1789,1793]/gtagt [2719,2723]/atagt [3685,3689]/gtag [4217,4220]	ttttat [265,270]/ttttat [280,285]/ttttat [2421,2426]/ttttat [2579,2584]/ttttat [3329,3334]/ttttat [3351,3356]/ttttat [3631,3636]/ttttaagt [4704,4711]	tgtaaata [4355,4362]/tgtatata [4604,4611]/tgtaaata [4683,4690]	attatct [1636,1642]/attgtct [1991,1997]/tttatct [3330,3336]
3HSAR000029921_CR000182969 731	atagt [694,698]	ttttaat [689,695]	none	attgtct [306,312]
3HSAR000061976_CR001389847 1203	gtagt [448,452]/gtag [661,664]/gtag [1040,1043]	none	tgtatata [1092,1099]	none
3HSAR000037645_CR000243044 2123	atagt [1043,1047]/atagt [1097,1101]/gtagt [1443,1447]/gtagt [2063,2067]	ttttat [336,341]/ttttat [443,448]/ttttat [459,464]/ttttat [1452,1457]/ttttaat [1742,1748]/ttttaat [1753,1759]/ttttaaat [2040,2047]	tgtatata [341,348]/tgtaaata [1022,1029]	attgtct [330,336]/attatct [632,638]
3HSAR000017715_CR000108410 114	none	none	none	none
3HSAR000056920_CR001250763 188	gtag [42,45]/gtag [104,107]	none	none	none
3HSAR000038085_CR000246141 63	none	none	none	none
3HSAR000035143_CR000220348 2653	gtagt [998,1002]/atagt [2452,2456]	ttttcat [2619,2625]	none	none
3HSAR000041299_CR000581312 2776	gtagt [2744,2748]	ttttat [280,285]/ttttat [298,303]	none	none
3HSAR000022564_CR000138144 1025	gtag [268,271]/gtag [369,372]	none	none	none
3HSAR000046920_CR000638132 4489	atagt [2437,2441]/gtagt [2713,2717]/gtagt [3147,3151]/gtagt [3229,3233]/gtagt [3777,3781]/atagt [4174,4178]/atagt [4320,4324]/gttagt [4331,4336]	ttttat [186,191]/ttttat [2491,2496]/ttttat [2536,2541]/ttttat [3541,3546]	tgtacata [1646,1653]/tgtaaata [2432,2439]	none
3HSAR000017868_CR000109377 207	atagt [131,135]	none	none	none
3HSAR000000237_CR000001441 84	none	ttttaat [47,53]	none	none
3HSAR000040736_CR000373351 682	gtag [150,153]	ttttcat [599,605]	tgtaaata [547,554]	attatct [627,633]
3HSAR000065924_CR001632921 88	none	none	none	none
3HSAR000023702_CR000145057 3496	atagt [1008,1012]/atagt [1356,1360]/gtagt [1873,1877]/atagt [1883,1887]/atagt [1950,1954]/gtagt [2505,2509]/atagt [3050,3054]/attagt [3488,3493]	ttttat [1323,1328]/ttttat [1732,1737]/ttttat [1972,1977]/ttttat [2137,2142]/ttttat [2210,2215]/ttttat [2973,2978]	tgtaaata [337,344]	tttatct [1515,1521]/attgtct [1785,1791]/tttatct [2390,2396]/attgtct [2605,2611]/tttatct [2974,2980]/tttatct [3211,3217]
3HSAR000046413_CR000634657 1000	gtagt [75,79]/gtagt [110,114]/gtag [611,614]/gtag [785,788]	ttttat [212,217]	none	attatct [58,64]
3HSAR000062170_CR001391244 2818	gtagt [263,267]/gtagt [478,482]/atagt [738,742]/atagt [884,888]/gtagt [1117,1121]/gtagt [1689,1693]/atttagt [2560,2566]	ttttaat [590,596]/ttttact [2749,2755]	tgtaaata [762,769]	none
3HSAR000009850_CR000060284 796	gtag [347,350]/gtag [398,401]/gtag [594,597]	ttttat [389,394]	tgtagata [397,404]	none
3HSAR000031504_CR000192592 85	none	none	none	none
3HSAR000011328_CR000069074 2258	atagt [633,637]/atagt [1260,1264]	ttttat [2237,2242]	tgtacata [628,635]	none
3HSAR000027270_CR000166877 3473	atagt [93,97]/atagt [268,272]/gtagt [1404,1408]/atagt [2184,2188]/atagt [2339,2343]/gtagt [2587,2591]/gttagt [2870,2875]/gtag [3035,3038]/gtag [3139,3142]/gtag [3161,3164]	ttttat [46,51]/ttttat [301,306]/ttttat [712,717]/ttttat [949,954]/ttttat [1252,1257]/ttttat [1556,1561]/ttttat [2158,2163]/ttttat [2270,2275]/ttttat [3423,3428]/ttttaaat [3456,3463]	none	attgtct [528,534]/attatct [768,774]/tttatct [1557,1563]
3HSAR000050002_CR000732627 153	none	none	none	none
3HSAR000005579_CR000034755 2810	atagt [1619,1623]/gttagt [2570,2575]	none	none	attgtct [2697,2703]
3HSAR000061421_CR001385904 553	none	none	none	none
3HSAR000003778_CR000023717 93	none	none	none	none
3HSAR000007794_CR000048186 828	gttagt [513,518]/gtttagt [642,648]/gtag [702,705]	ttttat [191,196]/ttttat [317,322]/ttttaat [456,462]/ttttaat [785,791]	none	none
3HSAR000013082_CR000079701 1521	gtagt [691,695]/atagt [804,808]/atagt [969,973]/gtag [1478,1481]	ttttat [748,753]/ttttat [1224,1229]	tgtaaata [637,644]	tttgtct [49,55]
3HSAR000029770_CR000182030 256	gtag [204,207]	ttttat [183,188]	none	none
3HSAR000011799_CR000071921 498	gtag [236,239]/gtag [290,293]	none	none	none
3HSAR000019055_CR000116675 5546	atagt [1159,1163]/atagt [1642,1646]/atagt [2623,2627]/atagt [2916,2920]/atagt [3738,3742]/gtagt [3780,3784]/gtagt [3791,3795]/atagt [4133,4137]/atagt [4825,4829]/gtagt [4924,4928]/atagt [4945,4949]/atagt [5040,5044]/atagt [5536,5540]	ttttat [341,346]/ttttat [3030,3035]/ttttat [4415,4420]/ttttat [5073,5078]/ttttat [5500,5505]	tgtagata [3845,3852]	attgtct [686,692]/attgtct [3974,3980]/tttgtct [4788,4794]
3HSAR000034011_CR000211294 873	none	none	none	none
3HSAR000043595_CR000600449 453	none	none	none	none
3HSAR000056785_CR001249652 411	none	none	none	none
3HSAR000018297_CR000111986 1776	atagt [568,572]/atagt [1014,1018]/gtag [1210,1213]/gtag [1252,1255]/gtag [1299,1302]/gtag [1358,1361]/gtag [1508,1511]	none	none	none
3HSAR000061447_CR001386083 244	none	none	none	none
3HSAR000037357_CR000241037 1237	atagt [1210,1214]	ttttat [641,646]/ttttat [1025,1030]/ttttcat [1043,1049]	none	tttatct [1026,1032]
3HSAR000014208_CR000086701 768	atagt [621,625]	none	none	none
3HSAR000056017_CR001223821 614	none	none	none	none
3HSAR000043426_CR000599178 925	gttagt [349,354]/gtag [434,437]/gtag [627,630]/gtag [641,644]	ttttat [851,856]	none	none
3HSAR000063487_CR001400617 1568	gtagt [1060,1064]/gtag [1386,1389]	ttttat [829,834]	none	tttgtct [706,712]
3HSAR000029471_CR000180189 4886	gtagt [415,419]/gtagt [2305,2309]/gtagt [2381,2385]/atagt [3307,3311]/atagt [3509,3513]/gtag [3972,3975]/gtag [4141,4144]/gtag [4147,4150]/gtag [4280,4283]/gtag [4412,4415]	ttttat [2206,2211]/ttttat [4547,4552]	none	tttgtct [3965,3971]
3HSAR000060926_CR001382394 796	atagt [517,521]/atagt [775,779]	ttttat [335,340]/ttttat [362,367]/ttttat [511,516]/ttttat [728,733]	none	attgtct [484,490]/tttatct [729,735]
3HSAR000001035_CR000006434 249	none	none	none	none
3HSAR000039754_CR000258502 1704	atagt [825,829]/attagt [1537,1542]	ttttaat [354,360]/ttttaat [1643,1649]	none	none
3HSAR000049848_CR000731491 787	gtag [182,185]	ttttat [444,449]	none	none
3HSAR000029227_CR000178718 753	gtag [54,57]/gtag [185,188]/gtag [252,255]/gtag [401,404]	ttttat [147,152]/ttttat [486,491]/ttttat [743,748]	tgtatata [121,128]	none
3HSAR000004939_CR000030809 3704	atagt [412,416]/atagt [878,882]/gtagt [1322,1326]/atagt [2465,2469]/atagt [2634,2638]	ttttat [408,413]/ttttat [1667,1672]/ttttat [1749,1754]/ttttat [3404,3409]/ttttat [3495,3500]	tgtatata [771,778]	attatct [1893,1899]/tttatct [2503,2509]
3HSAR000052608_CR000751537 134	none	ttttat [94,99]	none	none
3HSAR000039988_CR000260268 121	none	none	none	none
3HSAR000053187_CR000755749 281	atagt [111,115]/gtagt [171,175]	none	none	none
3HSAR000005166_CR000032197 1298	gtagt [68,72]/atagt [178,182]/atagt [459,463]/gtag [1066,1069]	ttttcat [1271,1277]	none	attatct [25,31]/tttatct [260,266]
3HSAR000043547_CR000600107 942	gtag [185,188]	ttttat [539,544]	none	none
3HSAR000038511_CR000249109 843	gtagt [30,34]/atagt [312,316]/gttagt [771,776]/gtag [781,784]	ttttaat [192,198]	none	none
3HSAR000054616_CR000792972 4095	gtagt [374,378]/atagt [767,771]/atagt [1048,1052]/gtagt [1694,1698]/gtagt [1799,1803]/atagt [2394,2398]/atagt [2725,2729]/atagt [3071,3075]/atagt [3418,3422]/gtag [3517,3520]	ttttat [791,796]/ttttat [1230,1235]/ttttat [1242,1247]/ttttat [1546,1551]/ttttat [1820,1825]/ttttat [2935,2940]/ttttat [2983,2988]/ttttat [3213,3218]/ttttaat [4008,4014]	tgtaaata [3087,3094]	tttatct [1231,1237]/tttgtct [1558,1564]/tttatct [1599,1605]/attgtct [1998,2004]/tttatct [2936,2942]/tttgtct [3586,3592]
3HSAR000016191_CR000098971 1820	atagt [333,337]/gtagt [1086,1090]	ttttat [1187,1192]/ttttat [1470,1475]/ttttact [1762,1768]	none	none
3HSAR000036166_CR000232383 1439	atagt [267,271]/gtagt [633,637]/atagt [876,880]/gtagt [910,914]/atagt [962,966]/gtagt [1013,1017]/atagt [1221,1225]	ttttat [958,963]/ttttat [1246,1251]	tgtaaata [462,469]	tttgtct [68,74]/tttatct [415,421]/tttgtct [900,906]
3HSAR000051567_CR000743743 298	gtag [205,208]	ttttaaat [227,234]	none	none
3HSAR000023129_CR000141570 284	none	ttttat [74,79]	none	none
3HSAR000008007_CR000049365 510	atagt [78,82]/gttagt [138,143]/gtag [216,219]	ttttat [494,499]	none	none
3HSAR000011868_CR000072335 221	none	none	none	none
3HSAR000029033_CR000177540 501	gtagt [430,434]	ttttaaat [462,469]	none	none
3HSAR000031796_CR000194380 323	gttagt [200,205]	ttttat [7,12]/ttttat [172,177]	none	none
3HSAR000024455_CR000149617 199	none	none	none	none
3HSAR000021834_CR000133743 74	attagt [58,63]	ttttaat [43,49]	none	none
3HSAR000020619_CR000126221 1461	atagt [814,818]	ttttat [264,269]/ttttat [403,408]/ttttat [714,719]/ttttat [993,998]/ttttat [1011,1016]/ttttaagt [1171,1178]/ttttact [1286,1292]	tgtacata [945,952]	attatct [731,737]
3HSAR000052556_CR000751161 21	none	none	none	none
3HSAR000052315_CR000749409 2733	gtagt [613,617]/atagt [1534,1538]/atagt [1606,1610]/gtagt [1840,1844]/gtag [1851,1854]/gtag [1883,1886]/gtag [1989,1992]/gtag [2701,2704]	ttttat [751,756]/ttttat [1381,1386]/ttttat [1498,1503]/ttttat [1538,1543]/ttttat [2691,2696]	tgtaaata [259,266]	tttatct [1382,1388]/tttatct [1539,1545]
3HSAR000034408_CR000214402 4086	atagt [262,266]/gtagt [730,734]/gtagt [3059,3063]/gtagt [3742,3746]	ttttat [3758,3763]	tgtagata [3709,3716]	attgtct [3653,3659]
3HSAR000019179_CR000117425 1922	atagt [294,298]/atagt [1795,1799]/atagt [1800,1804]	ttttat [170,175]/ttttat [540,545]/ttttat [728,733]/ttttat [814,819]/ttttaat [1840,1846]	none	none
3HSAR000038309_CR000247703 3082	gtagt [402,406]/gtagt [510,514]/atagt [915,919]/atagt [1107,1111]/gtagt [1571,1575]/gtagt [1582,1586]/atagt [1749,1753]/atagt [2511,2515]/attagt [2553,2558]/attagt [2904,2909]/gtag [2926,2929]	ttttat [796,801]/ttttat [1053,1058]/ttttat [1471,1476]/ttttat [1931,1936]/ttttat [1988,1993]/ttttat [2165,2170]/ttttat [2492,2497]/ttttaat [2640,2646]/ttttcat [2822,2828]	tgtagata [1538,1545]	tttgtct [715,721]/attatct [1782,1788]
3HSAR000018578_CR000113730 801	atagt [519,523]/atagt [667,671]	ttttat [515,520]/ttttat [773,778]	tgtaaata [135,142]	none
3HSAR000042853_CR000594836 392	gtag [263,266]	ttttat [53,58]	none	attatct [256,262]
3HSAR000060284_CR001378354 1626	gtag [113,116]	none	none	none
3HSAR000035161_CR000220488 185	none	none	none	none
3HSAR000040171_CR000261652 1270	gtag [27,30]/gtag [508,511]/gtag [612,615]/gtag [782,785]	ttttat [871,876]/ttttat [1000,1005]	tgtaaata [899,906]	tttgtct [1107,1113]
3HSAR000034198_CR000212761 305	none	none	none	none
3HSAR000052140_CR000748171 459	none	ttttaaat [46,53]	none	none
3HSAR000008674_CR000053215 1291	gtagt [123,127]/atagt [582,586]/atagt [1279,1283]	ttttat [448,453]/ttttat [1041,1046]/ttttat [1183,1188]	none	none
3HSAR000051982_CR000746844 1798	atagt [370,374]/gtagt [1431,1435]	ttttat [574,579]/ttttat [883,888]/ttttat [1194,1199]/ttttat [1713,1718]/ttttat [1728,1733]	tgtaaata [1770,1777]	none
3HSAR000029874_CR000182676 107	none	none	none	none
3HSAR000028233_CR000172692 757	gtagt [480,484]/atttagt [738,744]	ttttat [330,335]/ttttat [712,717]	none	none
3HSAR000062312_CR001392256 117	none	none	none	none
3HSAR000061312_CR001385137 735	atagt [589,593]/gtagt [730,734]	ttttat [483,488]/ttttat [722,727]	none	none
3HSAR000008130_CR000049970 138	gtag [50,53]/gtag [85,88]	none	none	none
3HSAR000011349_CR000069193 169	gtagt [7,11]	none	none	none
3HSAR000013565_CR000082670 51	none	none	none	none
3HSAR000038113_CR000246342 3888	gtagt [1151,1155]/gtagt [1352,1356]/atagt [2257,2261]/gtagt [3176,3180]/gtagt [3369,3373]/gtag [3700,3703]/gtag [3734,3737]/gtag [3762,3765]	ttttat [819,824]/ttttat [1024,1029]/ttttat [3500,3505]	none	attgtct [2570,2576]
3HSAR000028144_CR000172153 3358	attagt [497,502]/attagt [2111,2116]/attagt [3134,3139]	ttttat [3332,3337]	none	tttatct [333,339]
3HSAR000030695_CR000187735 376	gtag [293,296]	none	none	none
3HSAR000058287_CR001260655 2408	atagt [738,742]/atagt [1411,1415]/gtagt [1702,1706]/atagt [2244,2248]	ttttat [377,382]/ttttat [2131,2136]/ttttat [2328,2333]	tgtatata [1612,1619]	tttatct [876,882]
3HSAR000060257_CR001378183 879	atagt [363,367]/atttagt [410,416]/gtag [424,427]/gtag [736,739]	ttttat [781,786]	tgtaaata [465,472]	none
3HSAR000060909_CR001382293 5202	gtagt [521,525]/gtagt [4492,4496]/gtagt [4661,4665]	ttttat [983,988]/ttttat [2050,2055]/ttttat [3803,3808]/ttttaat [4240,4246]	tgtaaata [667,674]	tttgtct [3285,3291]/attgtct [4171,4177]
3HSAR000024658_CR000150867 89	none	none	none	tttatct [63,69]
3HSAR000061578_CR001387006 506	atagt [45,49]/atagt [200,204]	none	none	none
3HSAR000019570_CR000119761 1271	atagt [674,678]/atagt [702,706]/gtagt [1124,1128]/gtag [1246,1249]	ttttat [317,322]/ttttat [742,747]/ttttat [1000,1005]/ttttaaat [1059,1066]	none	tttgtct [130,136]/attatct [210,216]
3HSAR000005458_CR000033989 1058	gtag [470,473]	ttttat [407,412]/ttttat [863,868]/ttttaat [961,967]	none	tttatct [408,414]
3HSAR000019232_CR000117749 1948	gtagt [1551,1555]/gtagt [1570,1574]	ttttat [888,893]/ttttat [1516,1521]/ttttat [1771,1776]	tgtatata [339,346]	attatct [1232,1238]
3HSAR000064583_CR001408493 293	none	ttttat [31,36]	none	tttgtct [276,282]
3HSAR000060273_CR001378287 168	none	none	none	none
3HSAR000040126_CR000261297 216	none	ttttat [171,176]/ttttaaat [189,196]	none	none
3HSAR000008054_CR000049601 1126	atagt [327,331]/gtagt [763,767]/atagt [1022,1026]/gtag [1090,1093]	ttttat [392,397]/ttttat [549,554]/ttttat [685,690]/ttttat [754,759]	none	tttatct [1118,1124]
3HSAR000060765_CR001381433 486	atagt [367,371]/atagt [402,406]	ttttat [232,237]/ttttat [422,427]	none	none
3HSAR000028903_CR000176740 887	gtagt [133,137]	ttttat [535,540]/ttttat [718,723]	none	none
3HSAR000029758_CR000181956 387	atagt [134,138]	none	none	none
3HSAR000031213_CR000190825 852	gtagt [243,247]/atagt [548,552]/gtagt [744,748]	none	none	none
3HSAR000054113_CR000788111 2676	atagt [865,869]/atagt [1607,1611]/atagt [2061,2065]/gtag [2277,2280]	ttttat [288,293]/ttttat [1283,1288]/ttttat [1489,1494]/ttttat [1849,1854]/ttttat [2017,2022]/ttttat [2390,2395]/ttttact [2660,2666]	none	tttgtct [1249,1255]/tttatct [1490,1496]
3HSAR000026075_CR000159577 2884	atagt [2624,2628]/gtag [2757,2760]	ttttaaat [2804,2811]	none	none
3HSAR000049651_CR000729993 2316	atagt [337,341]/atagt [437,441]/gtagt [459,463]/gtagt [524,528]/atagt [1188,1192]/gtagt [1478,1482]/atagt [1910,1914]/atagt [2082,2086]	ttttat [654,659]/ttttat [852,857]/ttttat [1333,1338]/ttttat [1932,1937]/ttttat [2018,2023]	tgtatata [107,114]/tgtacata [417,424]/tgtatata [965,972]/tgtaaata [2234,2241]	attatct [804,810]/attgtct [1237,1243]
3HSAR000024801_CR000151748 637	gtagt [23,27]/gtag [144,147]/gtag [602,605]	none	none	none
3HSAR000037455_CR000241719 3869	atagt [2793,2797]/gttagt [2876,2881]/gtttagt [3090,3096]/gtag [3208,3211]/gtag [3229,3232]/gtag [3526,3529]/gtag [3833,3836]	ttttat [3546,3551]	none	tttatct [1862,1868]/tttgtct [1877,1883]/tttgtct [1903,1909]
3HSAR000064206_CR001405737 193	none	none	none	none
3HSAR000045782_CR000629453 649	gtagt [493,497]	none	none	none
3HSAR000058867_CR001369203 4569	atagt [157,161]/atagt [308,312]/atagt [629,633]/atagt [1079,1083]/gtagt [1202,1206]/atagt [1655,1659]/atagt [1960,1964]/atagt [2126,2130]/atagt [2989,2993]/gtagt [3901,3905]/atagt [4110,4114]/atagt [4169,4173]/atagt [4450,4454]	ttttat [356,361]/ttttat [690,695]/ttttat [1122,1127]/ttttat [1186,1191]/ttttat [1273,1278]/ttttat [1357,1362]/ttttat [1386,1391]/ttttat [1532,1537]/ttttat [1691,1696]/ttttat [2666,2671]/ttttat [3758,3763]/ttttat [4438,4443]	none	tttatct [1274,1280]/tttatct [2563,2569]/attatct [3003,3009]
3HSAR000024116_CR000147567 3458	atagt [3314,3318]	ttttat [918,923]/ttttat [3206,3211]	none	attatct [1583,1589]
3HSAR000045882_CR000630348 1769	gtagt [525,529]/gtagt [1259,1263]/atagt [1388,1392]	ttttat [153,158]/ttttat [592,597]/ttttat [901,906]/ttttaat [1706,1712]	none	attatct [643,649]/attatct [795,801]
3HSAR000021498_CR000131696 99	none	none	none	none
3HSAR000034788_CR000217739 297	atagt [164,168]	ttttaat [35,41]/ttttaat [99,105]	none	none
3HSAR000014474_CR000088347 5083	atagt [302,306]/atagt [1153,1157]/gtagt [1982,1986]/attagt [2746,2751]/gtttagt [4101,4107]/atttagt [4521,4527]/gtag [4683,4686]/gtag [4780,4783]/gtag [4933,4936]	ttttat [215,220]/ttttat [714,719]/ttttat [874,879]/ttttat [973,978]/ttttat [1157,1162]/ttttat [1245,1250]/ttttat [1561,1566]/ttttat [1586,1591]/ttttat [1727,1732]/ttttat [3357,3362]/ttttaaat [3372,3379]	tgtatata [2063,2070]/tgtaaata [5001,5008]	tttatct [642,648]/attgtct [684,690]/attatct [705,711]/tttatct [979,985]/tttatct [1158,1164]/tttatct [1246,1252]/tttgtct [2619,2625]/attgtct [3443,3449]/attgtct [4139,4145]
3HSAR000058178_CR001259826 218	none	ttttat [150,155]	none	none
3HSAR000000924_CR000005737 17	none	none	none	none
3HSAR000033398_CR000206660 253	gtag [78,81]	none	none	none
3HSAR000002892_CR000018213 3560	gtagt [136,140]/gtagt [340,344]/gtagt [1290,1294]/gtagt [1667,1671]/atagt [1711,1715]/atagt [1841,1845]/atagt [1878,1882]/gtagt [2387,2391]/atagt [3087,3091]/atttagt [3196,3202]	ttttat [614,619]/ttttat [1390,1395]/ttttat [2464,2469]/ttttat [3083,3088]/ttttat [3221,3226]/ttttat [3293,3298]/ttttat [3405,3410]	tgtatata [3481,3488]/tgtatata [3493,3500]/tgtaaata [3548,3555]	none
3HSAR000008812_CR000054055 8043	gtagt [1215,1219]/atagt [1458,1462]/gtagt [1735,1739]/atagt [1778,1782]/gtagt [1905,1909]/atagt [2655,2659]/atagt [2741,2745]/gtagt [3718,3722]/atagt [3984,3988]/atagt [4119,4123]/gtagt [4252,4256]/atagt [4488,4492]/atagt [7047,7051]/gtagt [7265,7269]/atagt [7767,7771]/atttagt [7779,7785]	ttttat [1804,1809]/ttttat [2307,2312]/ttttat [2773,2778]/ttttat [4371,4376]/ttttat [5990,5995]/ttttat [6012,6017]/ttttat [6045,6050]/ttttat [6242,6247]/ttttat [6265,6270]/ttttat [7994,7999]	tgtatata [5770,5777]	tttgtct [245,251]/tttatct [2860,2866]/tttatct [4525,4531]/attgtct [5516,5522]/tttgtct [5865,5871]/tttatct [5991,5997]/attatct [7889,7895]
3HSAR000040114_CR000261211 216	none	ttttat [171,176]/ttttaaat [189,196]	none	none
3HSAR000009705_CR000059416 602	gttagt [141,146]/gtag [275,278]	none	none	none
3HSAR000014618_CR000089211 845	gtagt [194,198]/atagt [650,654]	ttttat [421,426]/ttttat [537,542]/ttttact [660,666]	none	none
3HSAR000058585_CR001367271 1268	gtag [700,703]	ttttat [451,456]/ttttat [481,486]/ttttat [978,983]/ttttat [1040,1045]/ttttaagt [1239,1246]	none	tttatct [452,458]
3HSAR000006936_CR000043071 738	atagt [233,237]/atagt [386,390]/gtag [490,493]	ttttat [513,518]/ttttat [570,575]	tgtaaata [562,569]	none
3HSAR000042646_CR000593276 1140	gtagt [413,417]/atagt [941,945]/gtag [991,994]	ttttat [875,880]	tgtatata [1073,1080]	attatct [144,150]/attgtct [189,195]
3HSAR000023758_CR000145398 4092	atagt [1974,1978]/atagt [2453,2457]/atagt [2904,2908]/attagt [3018,3023]/attagt [3476,3481]	ttttat [619,624]/ttttat [1882,1887]/ttttat [2415,2420]/ttttat [3262,3267]/ttttat [3637,3642]/ttttat [3649,3654]/ttttaat [3994,4000]	tgtatata [4021,4028]	tttatct [620,626]/tttatct [3037,3043]/attatct [3674,3680]
3HSAR000029138_CR000178186 171	gtag [48,51]	none	none	none
3HSAR000063867_CR001403313 153	gttagt [98,103]	ttttat [142,147]	none	none
3HSAR000008988_CR000055134 926	gtagt [358,362]/atagt [800,804]/atagt [907,911]	none	none	tttatct [804,810]
3HSAR000063163_CR001398310 1300	gttagt [526,531]	ttttat [80,85]/ttttat [201,206]/ttttat [1058,1063]	none	tttatct [1059,1065]
3HSAR000042550_CR000592537 1644	atagt [1568,1572]	ttttat [163,168]	tgtatata [1045,1052]	tttgtct [1280,1286]
3HSAR000037778_CR000243964 2933	gtag [44,47]/gtag [571,574]/gtag [1103,1106]/gtag [1299,1302]/gtag [1922,1925]/gtag [2280,2283]	ttttat [1125,1130]/ttttat [2328,2333]	none	tttatct [1126,1132]
3HSAR000009997_CR000061150 123	none	ttttat [71,76]	none	none
3HSAR000017589_CR000107645 6017	atagt [825,829]/atagt [1337,1341]/gtagt [1427,1431]/atagt [1523,1527]/atagt [1551,1555]/atagt [1829,1833]/atagt [1900,1904]/atagt [2069,2073]/atagt [2408,2412]/atagt [3914,3918]/gtagt [3939,3943]/atagt [4588,4592]/atagt [4865,4869]/gtagt [5180,5184]/gtagt [5200,5204]/gtagt [5238,5242]/atagt [5468,5472]/gtagt [5597,5601]/gtag [5707,5710]	ttttat [713,718]/ttttat [2365,2370]/ttttat [3199,3204]/ttttat [4817,4822]/ttttat [4899,4904]/ttttat [5725,5730]/ttttat [5981,5986]	tgtatata [3263,3270]/tgtatata [5211,5218]	tttatct [560,566]/attatct [881,887]/tttgtct [2770,2776]/tttatct [5274,5280]/attgtct [5389,5395]/tttatct [5892,5898]
3HSAR000043437_CR000599257 313	gttagt [200,205]	ttttat [7,12]/ttttat [172,177]	none	none
3HSAR000003183_CR000020068 2437	gtagt [296,300]/gtagt [1169,1173]/atagt [1256,1260]/gtagt [1982,1986]/atagt [2232,2236]	ttttat [1409,1414]/ttttat [1692,1697]/ttttat [1859,1864]/ttttat [1911,1916]/ttttact [2313,2319]	none	none
3HSAR000007428_CR000045997 73	gtagt [40,44]	none	none	none
3HSAR000024683_CR000151030 890	gtagt [584,588]	none	none	none
3HSAR000020804_CR000127375 447	gtagt [146,150]	ttttat [335,340]	none	none
3HSAR000022724_CR000139121 42	none	none	none	none
3HSAR000021035_CR000128821 2733	atagt [516,520]/atagt [680,684]/gtagt [933,937]/gtagt [940,944]/gtagt [1274,1278]/atagt [2455,2459]/atagt [2644,2648]/atagt [2657,2661]/attagt [2722,2727]	ttttat [1822,1827]/ttttat [1939,1944]/ttttat [2622,2627]/ttttat [2708,2713]	tgtatata [703,710]/tgtaaata [1135,1142]	attatct [2270,2276]/attgtct [2384,2390]
3HSAR000064073_CR001404771 903	gtag [408,411]/gtag [498,501]/gtag [551,554]	none	none	none
3HSAR000019500_CR000119341 86	none	none	none	none
3HSAR000040839_CR000374094 649	atagt [331,335]	ttttat [615,620]	none	none
3HSAR000065774_CR001631163 213	none	none	none	none
3HSAR000009537_CR000058407 1006	gtag [506,509]	none	none	none
3HSAR000066297_CR001712683 363	atagt [289,293]	ttttat [267,272]	none	none
3HSAR000018659_CR000114233 1410	atagt [597,601]/gtag [990,993]	ttttat [272,277]/ttttaaat [1349,1356]	tgtaaata [592,599]	tttgtct [386,392]/tttgtct [685,691]
3HSAR000060642_CR001380708 759	none	ttttact [731,737]	none	none
3HSAR000048268_CR000719546 6750	gtagt [1000,1004]/gtagt [1833,1837]/gtagt [3030,3034]/gtagt [4836,4840]/gtagt [6126,6130]	ttttat [26,31]/ttttat [774,779]/ttttat [1106,1111]/ttttat [1533,1538]/ttttat [1976,1981]/ttttat [6237,6242]/ttttat [6667,6672]	tgtaaata [6491,6498]	tttatct [6668,6674]
3HSAR000061430_CR001385968 530	none	none	none	none
3HSAR000009836_CR000060202 121	none	none	none	none
3HSAR000015048_CR000091862 362	gtag [121,124]	none	none	none
3HSAR000063437_CR001400269 2487	atagt [2482,2486]	ttttaagt [700,707]/ttttcat [2298,2304]/ttttcat [2477,2483]	tgtacata [1613,1620]	none
3HSAR000031480_CR000192447 179	atagt [46,50]/gtag [120,123]	none	none	none
3HSAR000052617_CR000751599 1724	atagt [93,97]/atagt [496,500]/attagt [1377,1382]	ttttat [122,127]/ttttat [505,510]/ttttat [637,642]/ttttat [953,958]/ttttat [1202,1207]/ttttaat [1354,1360]	none	tttatct [506,512]
3HSAR000022616_CR000138459 268	gtag [37,40]	none	none	none
3HSAR000037751_CR000243780 3813	atagt [302,306]/gtagt [803,807]/gtagt [2993,2997]/gtag [3309,3312]/gtag [3447,3450]	ttttat [318,323]/ttttat [1594,1599]/ttttat [2609,2614]/ttttat [3421,3426]	tgtagata [1693,1700]/tgtatata [3261,3268]/tgtatata [3676,3683]	tttatct [3422,3428]
3HSAR000050971_CR000739663 104	none	none	none	none
3HSAR000027757_CR000169793 2671	gtagt [9,13]/atagt [105,109]/atagt [181,185]/atagt [948,952]/atagt [1035,1039]/atagt [1327,1331]/atagt [1653,1657]/gtagt [1721,1725]/gtagt [1775,1779]/atagt [1865,1869]/gtagt [2403,2407]	ttttat [664,669]/ttttat [1068,1073]/ttttat [1292,1297]/ttttat [2198,2203]/ttttat [2219,2224]	none	attgtct [201,207]/tttatct [1587,1593]/attgtct [1934,1940]
3HSAR000034740_CR000217370 1221	gtagt [1059,1063]/attagt [1193,1198]	ttttcat [458,464]	none	none
3HSAR000027173_CR000166288 349	none	ttttat [126,131]/ttttat [178,183]/ttttat [301,306]	none	tttatct [179,185]
3HSAR000033477_CR000207274 1022	gtagt [290,294]	ttttat [294,299]	none	none
3HSAR000028656_CR000175257 1271	atagt [493,497]/atagt [641,645]/gtag [1228,1231]	ttttat [809,814]	tgtagata [1227,1234]	none
3HSAR000018146_CR000111062 253	none	none	none	none
3HSAR000010560_CR000064536 1253	gtagt [495,499]/gtagt [534,538]/gtag [1106,1109]	ttttat [109,114]/ttttat [204,209]/ttttat [657,662]/ttttat [858,863]/ttttaaat [877,884]/ttttact [1071,1077]	tgtacata [821,828]/tgtaaata [915,922]	tttatct [205,211]
3HSAR000025430_CR000155628 83	none	none	none	none
3HSAR000039429_CR000255986 3275	gtagt [230,234]/gtagt [318,322]/atagt [430,434]/atagt [496,500]/atagt [604,608]/gtagt [899,903]/gtagt [2227,2231]/atagt [2842,2846]/atagt [3178,3182]/gtagt [3231,3235]	ttttat [1068,1073]/ttttat [1122,1127]/ttttat [1197,1202]/ttttat [1683,1688]/ttttat [2137,2142]/ttttat [2243,2248]/ttttat [2278,2283]/ttttat [2319,2324]/ttttat [3026,3031]/ttttat [3037,3042]/ttttat [3092,3097]	tgtaaata [913,920]	tttatct [2279,2285]
3HSAR000004081_CR000025565 430	none	ttttat [230,235]	none	tttatct [231,237]
3HSAR000004842_CR000030207 7898	gtagt [96,100]/atagt [138,142]/atagt [772,776]/gtagt [1075,1079]/atagt [1822,1826]/atagt [2106,2110]/atagt [2744,2748]/gtagt [2926,2930]/atagt [3400,3404]/atagt [3571,3575]/atagt [3587,3591]/gtagt [3876,3880]/atagt [4083,4087]/atagt [5304,5308]/gtagt [5534,5538]/atagt [5571,5575]/atagt [6260,6264]/atagt [7206,7210]/gttagt [7689,7694]	ttttat [1097,1102]/ttttat [1535,1540]/ttttat [2965,2970]/ttttat [4982,4987]/ttttat [6300,6305]/ttttat [7122,7127]/ttttat [7213,7218]/ttttaat [7539,7545]/ttttaat [7852,7858]	tgtaaata [1500,1507]/tgtaaata [3783,3790]/tgtatata [3915,3922]/tgtatata [4751,4758]/tgtacata [5866,5873]/tgtagata [6583,6590]/tgtaaata [7248,7255]/tgtatata [7326,7333]	attatct [848,854]/attatct [1283,1289]/tttatct [1956,1962]/attgtct [7307,7313]
3HSAR000048033_CR000717840 1327	gttagt [791,796]	none	tgtaaata [880,887]	none
3HSAR000061243_CR001384653 973	atagt [303,307]/gtag [803,806]	none	none	none
3HSAR000008810_CR000054042 84	gtag [2,5]	none	none	none
3HSAR000038935_CR000252301 1272	atagt [829,833]	ttttat [837,842]	tgtatata [824,831]	none
3HSAR000000479_CR000003009 80	none	none	none	none
3HSAR000039536_CR000256848 437	gtagt [253,257]	ttttat [261,266]/ttttaat [330,336]	none	none
3HSAR000005036_CR000031392 1426	atagt [42,46]/atagt [159,163]/gtagt [548,552]/gtag [718,721]/gtag [859,862]	ttttat [61,66]/ttttat [146,151]/ttttat [965,970]/ttttat [1332,1337]	tgtatata [1149,1156]	none
3HSAR000021259_CR000130220 219	none	none	none	none
3HSAR000032498_CR000198831 361	gttagt [336,341]	none	none	none
3HSAR000023508_CR000143868 1187	gtagt [88,92]/atagt [696,700]/atagt [725,729]/gtagt [866,870]	ttttat [233,238]/ttttat [399,404]/ttttat [446,451]/ttttat [662,667]/ttttat [715,720]/ttttat [902,907]/ttttat [909,914]	tgtacata [704,711]	attatct [450,456]
3HSAR000010340_CR000063211 185	none	none	none	none
3HSAR000031343_CR000191611 72	none	none	none	attgtct [28,34]
3HSAR000041790_CR000585632 466	gtagt [86,90]/gtagt [316,320]	ttttat [365,370]	none	none
3HSAR000053342_CR000766157 4503	atagt [724,728]/atagt [1033,1037]/gtagt [1408,1412]/atagt [1585,1589]/gtagt [1952,1956]/atagt [2484,2488]/gtagt [2674,2678]/gtagt [3014,3018]/gtagt [3114,3118]/atagt [3378,3382]/gtagt [3454,3458]/atagt [3525,3529]/atagt [3719,3723]/gtagt [3894,3898]/gtag [4001,4004]	ttttat [366,371]/ttttat [495,500]/ttttat [720,725]/ttttat [2368,2373]/ttttat [2388,2393]/ttttat [3041,3046]/ttttat [3264,3269]/ttttat [3305,3310]/ttttat [4350,4355]/ttttaat [4403,4409]/ttttcat [4480,4486]	tgtatata [2312,2319]	tttatct [367,373]/tttgtct [4276,4282]
3HSAR000037341_CR000240925 4025	gtagt [105,109]/gtagt [1361,1365]/gtagt [2146,2150]/gtagt [2734,2738]/gtagt [2884,2888]/atagt [2930,2934]/gtagt [3122,3126]/gtagt [3243,3247]/atagt [3429,3433]/gtagt [3829,3833]/atagt [3888,3892]/gtagt [3928,3932]/gtag [3993,3996]	ttttat [310,315]/ttttat [453,458]/ttttat [1092,1097]/ttttat [1835,1840]/ttttat [1855,1860]/ttttat [1959,1964]/ttttaat [1970,1976]/ttttaat [2067,2073]/ttttaat [3936,3942]	tgtaaata [286,293]	attatct [3586,3592]
3HSAR000030120_CR000184198 153	none	none	none	none
3HSAR000041161_CR000532458 2454	atagt [316,320]/atagt [494,498]/gtagt [751,755]/atagt [1930,1934]/atagt [2407,2411]	ttttat [433,438]/ttttat [574,579]/ttttat [709,714]/ttttat [781,786]/ttttat [1335,1340]/ttttaaat [1987,1994]	tgtaaata [208,215]	attgtct [252,258]/tttatct [782,788]
3HSAR000004091_CR000025630 918	gtagt [565,569]/atagt [675,679]	ttttat [664,669]/ttttat [767,772]/ttttaat [821,827]	none	none
3HSAR000055389_CR000798748 1702	atagt [1320,1324]/atagt [1332,1336]	none	none	none
3HSAR000038301_CR000247648 306	gtagt [131,135]	ttttaaat [164,171]	tgtaaata [26,33]	none
3HSAR000053890_CR000786063 595	gtttagt [449,455]	ttttat [526,531]	none	none
3HSAR000054866_CR000794854 2449	atagt [1554,1558]/atagt [1608,1612]/atagt [1737,1741]/atagt [1788,1792]/atagt [2061,2065]/gtagt [2074,2078]/gtag [2090,2093]	ttttaat [1504,1510]/ttttaat [1977,1983]	tgtaaata [155,162]	tttatct [217,223]/attgtct [1197,1203]
3HSAR000040235_CR000262159 3266	gtagt [1145,1149]/atagt [1313,1317]/atagt [3044,3048]/gtagt [3110,3114]/gtag [3137,3140]	ttttat [271,276]/ttttat [279,284]/ttttat [301,306]/ttttat [1475,1480]/ttttat [1942,1947]/ttttat [2429,2434]/ttttat [3077,3082]	none	attgtct [686,692]
3HSAR000056893_CR001250503 849	attagt [621,626]	ttttat [617,622]	none	none
3HSAR000013234_CR000080618 639	attagt [277,282]/attagt [601,606]	ttttat [187,192]/ttttcat [496,502]	none	none
3HSAR000020203_CR000123637 113	gtag [73,76]	none	none	none
3HSAR000006489_CR000040347 473	atagt [317,321]	none	none	tttatct [150,156]/tttgtct [178,184]
3HSAR000061208_CR001384391 1537	gtag [172,175]/gtag [227,230]/gtag [1050,1053]	ttttat [217,222]/ttttat [383,388]/ttttat [475,480]/ttttaat [1390,1396]	tgtacata [1448,1455]	none
3HSAR000007464_CR000046215 1553	gtagt [1411,1415]/atagt [1443,1447]	ttttaat [1394,1400]/ttttact [1510,1516]	none	none
3HSAR000002475_CR000015516 774	gtagt [93,97]/gtag [275,278]/gtag [369,372]	ttttaaat [474,481]	none	none
3HSAR000052427_CR000750218 227	none	none	none	none
3HSAR000026029_CR000159288 367	gtag [79,82]	none	none	none
3HSAR000048012_CR000717697 884	atagt [418,422]	none	none	none
3HSAR000055248_CR000797628 1178	atagt [444,448]/atagt [914,918]/gttagt [984,989]	ttttat [335,340]/ttttat [844,849]/ttttat [1097,1102]	none	tttgtct [572,578]
3HSAR000021735_CR000133142 420	gtagt [79,83]	none	none	none
3HSAR000013411_CR000081701 286	atagt [23,27]/gtag [143,146]	ttttcat [90,96]	tgtacata [165,172]/tgtaaata [215,222]	none
3HSAR000057630_CR001255644 2917	atagt [267,271]/atagt [1098,1102]/atagt [2638,2642]/gtagt [2876,2880]	ttttat [1468,1473]/ttttat [1738,1743]/ttttat [2178,2183]/ttttat [2607,2612]	none	tttatct [1228,1234]/attatct [1722,1728]
3HSAR000010468_CR000063990 66	none	none	none	none
3HSAR000028991_CR000177276 1132	gtag [497,500]/gtag [770,773]	none	none	none
3HSAR000037889_CR000244756 320	none	none	none	none
3HSAR000017010_CR000104060 3127	atagt [641,645]/atagt [1257,1261]/gtagt [1593,1597]/atagt [2444,2448]/atagt [2491,2495]/gtagt [2504,2508]	ttttat [529,534]/ttttat [1139,1144]/ttttat [1689,1694]/ttttat [2109,2114]/ttttat [2605,2610]/ttttat [2694,2699]/ttttaat [2880,2886]	tgtagata [1653,1660]	attgtct [1982,1988]/tttgtct [2120,2126]/attatct [2152,2158]/tttatct [2695,2701]
3HSAR000045963_CR000630987 117	none	none	none	none
3HSAR000034347_CR000213933 2441	gttagt [217,222]/gttagt [1622,1627]/gtag [2053,2056]	none	none	tttgtct [242,248]
3HSAR000059424_CR001373104 1517	atagt [198,202]/atagt [1022,1026]/gtagt [1128,1132]	ttttat [34,39]/ttttat [236,241]/ttttat [565,570]/ttttat [742,747]/ttttaaat [899,906]	none	none
3HSAR000026672_CR000163235 1738	gttagt [181,186]/gtag [675,678]/gtag [1145,1148]	none	none	none
3HSAR000015713_CR000095992 264	none	none	none	none
3HSAR000061038_CR001383185 735	gtag [329,332]/gtag [362,365]/gtag [395,398]	ttttaaat [648,655]	tgtacata [606,613]	none
3HSAR000045443_CR000626968 4349	atagt [239,243]/gtagt [915,919]/atagt [1613,1617]/atagt [1677,1681]/atagt [1725,1729]/atagt [2316,2320]/atagt [3209,3213]/atagt [3280,3284]/atagt [3937,3941]/gtag [4067,4070]	ttttaat [1665,1671]/ttttcat [4307,4313]	tgtaaata [1720,1727]/tgtagata [3152,3159]	tttgtct [1808,1814]
3HSAR000025538_CR000156278 239	none	ttttat [228,233]	none	none
3HSAR000013779_CR000084029 557	gtagt [115,119]/gttagt [450,455]	ttttat [200,205]	none	none
3HSAR000057536_CR001254952 954	atagt [166,170]/atagt [187,191]/gtagt [288,292]/gtagt [306,310]/atagt [569,573]/gtttagt [624,630]/gtag [631,634]	ttttaat [182,188]/ttttaat [594,600]	tgtaaata [884,891]	none
3HSAR000053112_CR000755190 304	atttagt [224,230]	none	none	none
3HSAR000026349_CR000161260 278	gtag [8,11]	none	none	none
3HSAR000007479_CR000046307 1095	gtag [327,330]/gtag [384,387]/gtag [446,449]/gtag [508,511]/gtag [570,573]/gtag [693,696]/gtag [755,758]/gtag [817,820]/gtag [940,943]	ttttat [1011,1016]	none	none
3HSAR000005688_CR000035404 843	gtagt [717,721]	none	none	none
3HSAR000063986_CR001404153 105	none	none	tgtaaata [67,74]	none
3HSAR000040704_CR000373115 204	none	none	none	none
3HSAR000046646_CR000636225 4777	gtagt [1904,1908]/gtagt [2118,2122]/atagt [2201,2205]/gtagt [2389,2393]/atagt [4093,4097]/gtag [4512,4515]	ttttat [2234,2239]/ttttat [3742,3747]/ttttat [4362,4367]/ttttat [4690,4695]/ttttaaat [4748,4755]	none	attatct [203,209]/attgtct [298,304]/tttatct [1890,1896]/attgtct [4381,4387]
3HSAR000034240_CR000213103 770	atagt [320,324]/atagt [380,384]/gtagt [440,444]/gtagt [500,504]/atagt [560,564]/atagt [620,624]/atagt [680,684]/atagt [740,744]	none	none	none
3HSAR000028322_CR000173227 1446	gtag [1107,1110]/gtag [1125,1128]/gtag [1132,1135]/gtag [1374,1377]/gtag [1392,1395]	none	none	tttgtct [743,749]/tttgtct [1337,1343]
3HSAR000007693_CR000047592 213	gtag [114,117]	none	none	none
3HSAR000010100_CR000061765 31	none	none	none	none
3HSAR000030705_CR000187797 541	gtag [360,363]	none	none	none
3HSAR000041802_CR000585724 758	gtag [335,338]	none	none	none
3HSAR000012112_CR000073803 1604	atagt [185,189]/gtagt [590,594]/gtag [1308,1311]	ttttat [181,186]/ttttat [1157,1162]/ttttat [1216,1221]/ttttcat [1390,1396]	none	attatct [452,458]/attgtct [537,543]/tttgtct [852,858]
3HSAR000048767_CR000723456 3422	gtagt [1635,1639]/atagt [2056,2060]/gtagt [2762,2766]/gtagt [2831,2835]/atagt [3176,3180]/atagt [3273,3277]/atagt [3321,3325]	ttttat [611,616]/ttttat [1787,1792]/ttttat [1878,1883]/ttttat [2594,2599]/ttttat [2667,2672]	none	tttgtct [856,862]
3HSAR000034049_CR000211593 1782	atagt [175,179]/gtag [211,214]/gtag [591,594]/gtag [1752,1755]	none	none	none
3HSAR000019250_CR000117856 584	none	ttttat [510,515]/ttttat [516,521]/ttttat [525,530]	none	none
3HSAR000058629_CR001367568 1352	gtagt [716,720]/atagt [1347,1351]	ttttat [300,305]/ttttat [463,468]/ttttat [536,541]/ttttat [730,735]/ttttat [990,995]/ttttaat [1210,1216]/ttttaat [1269,1275]	tgtacata [221,228]/tgtagata [286,293]/tgtatata [1148,1155]/tgtacata [1304,1311]	attgtct [634,640]
3HSAR000050017_CR000732739 992	gtag [178,181]/gtag [269,272]/gtag [766,769]	ttttat [78,83]/ttttaat [203,209]/ttttaat [664,670]/ttttact [928,934]	none	none
3HSAR000020356_CR000124593 413	none	none	none	none
3HSAR000001696_CR000010514 52	none	none	none	none
3HSAR000033247_CR000205450 59	none	ttttcat [27,33]	none	none
3HSAR000005772_CR000035911 1740	gtagt [516,520]/gtagt [995,999]/atagt [1001,1005]/atagt [1083,1087]/gtagt [1157,1161]/gtagt [1393,1397]/gtag [1611,1614]	ttttat [1325,1330]/ttttat [1677,1682]	tgtaaata [689,696]/tgtaaata [1454,1461]	tttatct [671,677]
3HSAR000029651_CR000181292 255	gtag [152,155]	ttttaat [214,220]	none	none
3HSAR000016531_CR000101086 188	gtag [75,78]	none	none	none
3HSAR000010124_CR000061910 357	none	ttttact [305,311]	none	none
3HSAR000043064_CR000596470 595	gtag [410,413]	none	none	none
3HSAR000012341_CR000075174 2975	atagt [607,611]/gtagt [2285,2289]/atagt [2878,2882]	ttttat [2042,2047]/ttttat [2625,2630]/ttttaat [2802,2808]	tgtaaata [962,969]	tttatct [2782,2788]
3HSAR000052494_CR000750713 2442	gtagt [486,490]/atagt [534,538]/gtagt [2174,2178]/attagt [2411,2416]	ttttat [671,676]/ttttat [1804,1809]/ttttat [2123,2128]/ttttat [2333,2338]	tgtacata [2056,2063]	tttgtct [1888,1894]
3HSAR000008216_CR000050446 52	none	none	none	none
3HSAR000043994_CR000603416 141	none	ttttcat [30,36]/ttttcat [91,97]/ttttcat [111,117]	none	attatct [85,91]
3HSAR000013777_CR000084019 557	gtagt [115,119]/gttagt [450,455]	ttttat [200,205]	none	none
3HSAR000037799_CR000244118 316	attagt [203,208]	none	none	none
3HSAR000064470_CR001407632 1578	atagt [113,117]/atttagt [312,318]/gtag [507,510]/gtag [563,566]/gtag [1080,1083]	ttttat [357,362]/ttttat [1052,1057]/ttttat [1563,1568]	none	tttgtct [1445,1451]/attgtct [1530,1536]
3HSAR000064416_CR001407241 703	gtagt [162,166]/gtag [630,633]	none	none	none
3HSAR000046955_CR000638394 2076	atagt [1473,1477]/gtagt [1485,1489]/gtagt [1954,1958]	ttttat [603,608]/ttttaat [978,984]/ttttaat [1813,1819]	none	tttgtct [351,357]
3HSAR000011176_CR000068178 815	attagt [134,139]/gtag [282,285]/gtag [311,314]	none	none	none
3HSAR000027481_CR000168164 2209	gtagt [572,576]/gtagt [975,979]/gtagt [1303,1307]/gtagt [1351,1355]/gtagt [1628,1632]/atagt [1848,1852]/gtag [1855,1858]/gtag [2140,2143]	ttttat [467,472]/ttttat [576,581]/ttttat [959,964]/ttttaat [1887,1893]	tgtacata [17,24]/tgtatata [2052,2059]	attgtct [202,208]/tttgtct [1725,1731]
3HSAR000040191_CR000261814 917	atagt [632,636]/atagt [885,889]	none	tgtatata [880,887]	none
3HSAR000054950_CR000795433 189	none	none	none	none
3HSAR000060854_CR001381953 2656	atagt [174,178]/atagt [378,382]/atagt [432,436]/atagt [647,651]/gtagt [868,872]/gtagt [2013,2017]/gttagt [2286,2291]	ttttat [112,117]/ttttat [507,512]/ttttat [1496,1501]/ttttat [1721,1726]/ttttcat [2292,2298]	none	attatct [277,283]/attatct [2240,2246]
3HSAR000061023_CR001383076 1498	none	ttttat [1047,1052]	none	none
3HSAR000017342_CR000106131 6749	gtagt [1000,1004]/gtagt [1833,1837]/gtagt [3030,3034]/gtagt [4836,4840]/gtagt [6126,6130]	ttttat [26,31]/ttttat [774,779]/ttttat [1106,1111]/ttttat [1533,1538]/ttttat [1976,1981]/ttttat [6237,6242]/ttttat [6667,6672]	tgtaaata [6491,6498]	tttatct [6668,6674]
3HSAR000037710_CR000243500 266	atagt [243,247]	ttttaat [38,44]	none	none
3HSAR000051832_CR000745725 942	atagt [261,265]/atagt [729,733]/gtagt [742,746]	ttttat [142,147]/ttttat [210,215]	none	attatct [619,625]
3HSAR000043580_CR000600343 254	gtag [175,178]	ttttat [77,82]/ttttat [217,222]	none	none
3HSAR000023420_CR000143345 84	none	ttttaat [47,53]	none	none
3HSAR000050105_CR000733381 1354	gtagt [666,670]/atagt [929,933]/atagt [1071,1075]/gtag [1219,1222]	ttttat [283,288]/ttttaat [394,400]	tgtatata [854,861]	none
3HSAR000054723_CR000793812 637	gtagt [23,27]/gtag [144,147]/gtag [602,605]	none	none	none
3HSAR000036329_CR000233586 2423	gtagt [2309,2313]/gtagt [2337,2341]	none	none	tttgtct [1329,1335]
3HSAR000010653_CR000065087 889	atagt [563,567]/attagt [763,768]	ttttcat [880,886]	none	none
3HSAR000024846_CR000152030 744	gtag [32,35]	none	none	attatct [446,452]
3HSAR000055850_CR001222465 416	gtag [122,125]	none	none	none
3HSAR000035794_CR000229307 272	attagt [188,193]	ttttat [151,156]/ttttcat [161,167]	none	tttatct [152,158]
3HSAR000041627_CR000584127 3347	atagt [21,25]/atagt [30,34]/gtagt [287,291]/gtagt [330,334]/atagt [667,671]/atagt [1251,1255]/gtagt [1407,1411]/atagt [2257,2261]/atagt [2403,2407]/gtagt [2450,2454]/gtagt [2542,2546]/atagt [2562,2566]/gtagt [2962,2966]/gtag [3154,3157]	ttttat [152,157]/ttttat [1631,1636]	tgtaaata [1009,1016]	tttatct [1732,1738]
3HSAR000019872_CR000121579 1754	atagt [930,934]/atagt [1129,1133]/atagt [1654,1658]/atttagt [1711,1717]	ttttat [122,127]/ttttaat [507,513]/ttttaaat [938,945]/ttttaaat [1604,1611]	tgtacata [823,830]	none
3HSAR000023994_CR000146838 4951	gtagt [1798,1802]/gtag [2140,2143]/gtag [3009,3012]/gtag [4595,4598]/gtag [4655,4658]	ttttat [575,580]/ttttat [994,999]/ttttat [1235,1240]/ttttat [3318,3323]	tgtacata [2103,2110]/tgtacata [2771,2778]	tttgtct [4890,4896]
3HSAR000038010_CR000245605 456	gttagt [1,6]/gtag [192,195]	none	none	none
3HSAR000007450_CR000046127 1278	atagt [652,656]/atagt [710,714]/gtagt [779,783]/atagt [830,834]/gtttagt [1204,1210]/gtag [1213,1216]	none	none	tttatct [907,913]/attatct [1164,1170]
3HSAR000056328_CR001226119 1639	gtag [544,547]/gtag [1570,1573]	none	tgtacata [1390,1397]	attatct [1357,1363]
3HSAR000048517_CR000721454 4480	gtagt [68,72]/gtagt [1604,1608]/atagt [2742,2746]/atagt [2856,2860]/gtag [2923,2926]/gtag [3064,3067]/gtag [3116,3119]/gtag [3723,3726]/gtag [4320,4323]	ttttat [1925,1930]/ttttat [4156,4161]/ttttat [4195,4200]/ttttat [4441,4446]/ttttat [4452,4457]	tgtaaata [922,929]/tgtatata [1954,1961]/tgtatata [2894,2901]/tgtaaata [3054,3061]/tgtaaata [4412,4419]	tttatct [1926,1932]/attgtct [2869,2875]/tttatct [3486,3492]
3HSAR000035686_CR000227673 1552	atagt [305,309]/atagt [409,413]/atagt [1535,1539]	ttttat [953,958]	tgtatata [844,851]	tttatct [954,960]/attatct [1386,1392]
3HSAR000040011_CR000260446 959	gtagt [552,556]/atagt [881,885]	ttttaat [839,845]	none	attatct [944,950]
3HSAR000039685_CR000257979 1094	atagt [268,272]/gtagt [316,320]/atagt [712,716]/gtag [987,990]	ttttat [797,802]/ttttat [1044,1049]	none	tttatct [798,804]/attatct [991,997]
3HSAR000053451_CR000773604 1748	gtagt [568,572]/gtagt [741,745]/gtag [1440,1443]	ttttaaat [579,586]/ttttact [919,925]	none	none
3HSAR000014061_CR000085776 2214	attagt [817,822]/atttagt [1010,1016]/gtag [1876,1879]	ttttat [689,694]/ttttat [1036,1041]/ttttat [1844,1849]/ttttat [1868,1873]/ttttat [2121,2126]	tgtaaata [2151,2158]	none
3HSAR000060570_CR001380279 1378	atagt [524,528]/atagt [918,922]/atttagt [1322,1328]	ttttat [733,738]	none	none
3HSAR000036409_CR000234155 1646	gtagt [433,437]/atagt [474,478]	ttttat [1233,1238]/ttttat [1370,1375]/ttttaat [1574,1580]	tgtatata [967,974]	attatct [802,808]
3HSAR000063389_CR001399931 3026	gtagt [301,305]/gtagt [1285,1289]/gtagt [1594,1598]/atagt [1944,1948]/gtagt [2042,2046]/atagt [2114,2118]/atagt [2335,2339]/atagt [2417,2421]/gtagt [2501,2505]/atagt [2667,2671]/atagt [2900,2904]	ttttat [123,128]/ttttat [1222,1227]/ttttat [2958,2963]/ttttaaat [3000,3007]	tgtacata [2330,2337]	none
3HSAR000046207_CR000633165 1408	gtagt [657,661]/gtagt [883,887]/attagt [1078,1083]/gtag [1262,1265]	ttttat [167,172]/ttttaat [180,186]/ttttaat [442,448]/ttttaat [815,821]/ttttact [1171,1177]	none	tttgtct [809,815]
3HSAR000047285_CR000640772 1265	atagt [33,37]/atagt [402,406]/gtagt [503,507]/atagt [697,701]/gtagt [1193,1197]	ttttat [253,258]/ttttat [1031,1036]/ttttat [1052,1057]/ttttat [1099,1104]	none	tttatct [254,260]/tttgtct [650,656]
3HSAR000063053_CR001397534 257	none	ttttat [154,159]	none	none
3HSAR000063571_CR001401192 778	gtagt [78,82]/atagt [243,247]/gtag [267,270]	ttttat [58,63]/ttttat [684,689]	none	tttatct [685,691]
3HSAR000048907_CR000724520 2987	atagt [94,98]/atagt [500,504]/atagt [1102,1106]/atagt [1686,1690]/atagt [2188,2192]/gtagt [2592,2596]/atagt [2795,2799]/attagt [2947,2952]	ttttat [1406,1411]/ttttat [1541,1546]/ttttat [1690,1695]/ttttat [2665,2670]/ttttaat [2802,2808]/ttttaat [2962,2968]	tgtatata [1368,1375]/tgtacata [1388,1395]/tgtaaata [2268,2275]	tttgtct [724,730]/tttgtct [971,977]/tttgtct [1770,1776]/tttatct [1942,1948]/tttatct [2755,2761]
3HSAR000032382_CR000198030 90	none	none	none	none
3HSAR000038472_CR000248842 665	atagt [86,90]/gttagt [620,625]/gtag [648,651]	ttttat [341,346]/ttttat [493,498]	none	attgtct [335,341]/tttatct [472,478]
3HSAR000041163_CR000532474 2454	atagt [316,320]/atagt [494,498]/gtagt [751,755]/atagt [1930,1934]/atagt [2407,2411]	ttttat [433,438]/ttttat [574,579]/ttttat [709,714]/ttttat [781,786]/ttttat [1335,1340]/ttttaaat [1987,1994]	tgtaaata [208,215]	attgtct [252,258]/tttatct [782,788]
3HSAR000045837_CR000629857 1169	gtagt [375,379]/gtagt [1058,1062]	none	none	tttgtct [923,929]
3HSAR000039223_CR000254424 7464	gtagt [363,367]/gtagt [920,924]/gtagt [1234,1238]/atagt [2379,2383]/gtagt [2795,2799]/gtagt [2900,2904]/atagt [4985,4989]/atagt [6076,6080]/atagt [7218,7222]/atagt [7392,7396]	ttttat [5427,5432]/ttttat [7021,7026]/ttttat [7139,7144]/ttttaat [7283,7289]	tgtaaata [7293,7300]/tgtaaata [7387,7394]	tttgtct [1112,1118]
3HSAR000000776_CR000004857 2493	gtagt [289,293]/gtagt [513,517]/gtagt [1139,1143]/gtagt [1510,1514]/atagt [1642,1646]/atagt [1660,1664]/gtagt [1783,1787]/attagt [2419,2424]	ttttat [1374,1379]/ttttat [1625,1630]/ttttat [1953,1958]/ttttat [2168,2173]/ttttaat [2411,2417]/ttttaagt [2445,2452]	tgtaaata [1805,1812]	attgtct [297,303]/attgtct [1762,1768]
3HSAR000039639_CR000257638 2090	gtagt [1273,1277]/atagt [1396,1400]/gtagt [1762,1766]/gtag [1975,1978]	ttttat [121,126]/ttttat [418,423]/ttttat [996,1001]/ttttat [1170,1175]/ttttat [1635,1640]/ttttaat [1848,1854]	tgtacata [1662,1669]	attatct [201,207]/attatct [896,902]/tttatct [1479,1485]/tttatct [1636,1642]
3HSAR000059026_CR001370314 680	atagt [264,268]	none	none	none
3HSAR000017252_CR000105565 122	none	none	none	none
3HSAR000047437_CR000713196 1452	atagt [482,486]/gtagt [816,820]/atagt [1026,1030]/atagt [1344,1348]	ttttat [19,24]/ttttat [258,263]/ttttat [288,293]/ttttat [1079,1084]/ttttaat [1274,1280]	none	attatct [721,727]/attatct [1063,1069]/tttatct [1080,1086]
3HSAR000038422_CR000248489 255	gtagt [108,112]	ttttat [154,159]	none	tttgtct [145,151]
3HSAR000017696_CR000108298 2791	gtagt [605,609]/atagt [1224,1228]/gtagt [1528,1532]/gttagt [2246,2251]/gtag [2254,2257]/gtag [2273,2276]/gtag [2519,2522]	none	none	tttgtct [1348,1354]/tttatct [1767,1773]
3HSAR000016045_CR000098072 1181	gtag [347,350]/gtag [363,366]/gtag [459,462]/gtag [1032,1035]	none	none	tttgtct [550,556]
3HSAR000029342_CR000179406 468	atagt [432,436]/atagt [442,446]	none	none	none
3HSAR000000852_CR000005319 3229	atagt [81,85]/gtagt [617,621]/atagt [1295,1299]/gtagt [1997,2001]/gtagt [2065,2069]/gtagt [3037,3041]/gtagt [3144,3148]/gtagt [3159,3163]	ttttat [1605,1610]/ttttat [2631,2636]	none	none
3HSAR000046226_CR000633297 459	atagt [175,179]/atagt [309,313]	ttttat [322,327]/ttttcat [373,379]	tgtacata [133,140]	none
3HSAR000006620_CR000041139 1262	gtag [409,412]/gtag [811,814]	ttttat [652,657]	none	tttatct [240,246]
3HSAR000041125_CR000532181 1840	atagt [860,864]/gtagt [962,966]/gtag [1078,1081]	ttttact [655,661]/ttttcat [814,820]	none	tttgtct [788,794]
3HSAR000017936_CR000109794 699	none	none	none	tttgtct [325,331]
3HSAR000034076_CR000211809 1063	gtagt [143,147]/gtagt [205,209]/atagt [472,476]/atagt [636,640]/gtag [983,986]	ttttat [588,593]/ttttact [877,883]	none	none
3HSAR000028772_CR000175959 2155	gtag [632,635]/gtag [686,689]/gtag [1593,1596]/gtag [1743,1746]	ttttat [489,494]/ttttat [498,503]/ttttat [1581,1586]	tgtaaata [1063,1070]/tgtaaata [1297,1304]	tttatct [1192,1198]/attatct [1250,1256]
3HSAR000000066_CR000000430 2651	gtagt [116,120]/gtagt [1780,1784]/gtagt [2477,2481]/atagt [2583,2587]	ttttat [151,156]/ttttat [452,457]/ttttat [1823,1828]/ttttat [2026,2031]/ttttat [2345,2350]/ttttat [2483,2488]	none	tttatct [1809,1815]/attgtct [2378,2384]
3HSAR000046899_CR000637961 9915	gtagt [339,343]/gtagt [530,534]/atagt [684,688]/atagt [1704,1708]/atagt [3592,3596]/gtagt [3798,3802]/gtagt [3882,3886]/atagt [4443,4447]/atagt [5555,5559]/atagt [5747,5751]/atagt [6397,6401]/atagt [6418,6422]/atagt [6625,6629]/gtagt [7928,7932]/atagt [8127,8131]/gtagt [9053,9057]/gtagt [9155,9159]/atagt [9378,9382]/gtag [9821,9824]	ttttat [3076,3081]/ttttat [3916,3921]/ttttat [5471,5476]/ttttat [5905,5910]/ttttat [6238,6243]/ttttat [8617,8622]/ttttat [9486,9491]/ttttat [9744,9749]/ttttaat [9775,9781]	none	tttatct [2041,2047]/attgtct [4266,4272]/tttgtct [4468,4474]/attatct [5797,5803]/attgtct [6921,6927]/tttgtct [7342,7348]
3HSAR000029804_CR000182242 117	gtag [41,44]	ttttat [109,114]	none	none
3HSAR000047018_CR000638840 226	none	none	none	none
3HSAR000041768_CR000585469 951	atagt [455,459]/atttagt [761,767]/gtag [856,859]/gtag [865,868]	ttttat [268,273]	none	tttgtct [196,202]
3HSAR000012591_CR000076694 654	gtagt [79,83]/gtagt [167,171]/gtagt [342,346]/atagt [416,420]/attagt [481,486]	ttttat [57,62]/ttttat [598,603]/ttttcat [642,648]	none	none
3HSAR000008350_CR000051251 168	gtagt [34,38]	none	none	none
3HSAR000017579_CR000107583 78	gtag [21,24]	none	none	none
3HSAR000040033_CR000260610 1052	gtag [271,274]/gtag [868,871]	ttttat [995,1000]	none	none
3HSAR000000502_CR000003153 48	none	none	none	none
3HSAR000002753_CR000017318 3525	gtagt [586,590]/gtagt [1269,1273]/atagt [2279,2283]/atagt [2935,2939]/gtag [3187,3190]/gtag [3405,3408]	ttttat [996,1001]/ttttat [2694,2699]/ttttat [2816,2821]/ttttat [2840,2845]/ttttat [2924,2929]/ttttat [3493,3498]	none	tttatct [2285,2291]
3HSAR000045441_CR000626951 4349	atagt [239,243]/gtagt [915,919]/atagt [1613,1617]/atagt [1677,1681]/atagt [1725,1729]/atagt [2316,2320]/atagt [3209,3213]/atagt [3280,3284]/atagt [3937,3941]/gtag [4067,4070]	ttttaat [1665,1671]/ttttcat [4307,4313]	tgtaaata [1720,1727]/tgtagata [3152,3159]	tttgtct [1808,1814]
3HSAR000063355_CR001399690 317	gtag [24,27]/gtag [189,192]	ttttat [57,62]	none	none
3HSAR000005425_CR000033770 326	none	none	none	none
3HSAR000055127_CR000796697 5359	atagt [686,690]/atagt [1338,1342]/gtagt [2233,2237]/atagt [2442,2446]/atagt [3034,3038]/atagt [4223,4227]/gtagt [4345,4349]/atagt [4527,4531]/atagt [4821,4825]	ttttat [245,250]/ttttat [564,569]/ttttat [682,687]/ttttat [1135,1140]/ttttat [1977,1982]/ttttat [2304,2309]/ttttat [2313,2318]/ttttat [2661,2666]/ttttat [2971,2976]/ttttat [4574,4579]/ttttat [4659,4664]/ttttat [5050,5055]/ttttcat [5289,5295]/ttttcat [5348,5354]	tgtaaata [5306,5313]	attgtct [695,701]/tttatct [1978,1984]/tttatct [2305,2311]
3HSAR000020281_CR000124127 244	gtag [57,60]	none	none	none
3HSAR000004733_CR000029545 2000	atagt [707,711]/gtagt [922,926]/atagt [1290,1294]/gtagt [1370,1374]/atagt [1540,1544]	ttttat [977,982]/ttttat [1316,1321]/ttttat [1426,1431]/ttttat [1916,1921]/ttttcat [1950,1956]	tgtaaata [418,425]/tgtaaata [1479,1486]	tttgtct [552,558]/tttgtct [1702,1708]/tttgtct [1875,1881]
3HSAR000005444_CR000033899 2435	atagt [391,395]/gtagt [652,656]/gtagt [1669,1673]/gtagt [1679,1683]/gtagt [2243,2247]/gtagt [2291,2295]/atagt [2323,2327]	ttttat [1881,1886]	tgtacata [2389,2396]	none
3HSAR000049382_CR000728053 2555	gtagt [219,223]/atagt [651,655]/atagt [1257,1261]/atagt [1724,1728]/gtagt [1941,1945]/gttagt [2032,2037]/attagt [2415,2420]	ttttat [331,336]/ttttat [1457,1462]/ttttat [1571,1576]/ttttat [1592,1597]/ttttat [1782,1787]/ttttat [2297,2302]/ttttat [2458,2463]	tgtacata [1175,1182]/tgtaaata [2528,2535]	tttgtct [1639,1645]
3HSAR000007836_CR000048430 3692	atagt [837,841]/gtagt [958,962]/gtagt [1298,1302]/gtagt [2703,2707]/gtagt [3075,3079]/atagt [3203,3207]/atagt [3661,3665]	ttttat [49,54]/ttttat [143,148]/ttttat [267,272]/ttttat [349,354]/ttttat [542,547]/ttttat [591,596]/ttttat [1027,1032]/ttttat [1230,1235]/ttttat [2543,2548]/ttttat [2928,2933]/ttttat [3404,3409]/ttttat [3510,3515]	tgtacata [3308,3315]	tttatct [1028,1034]/attatct [3227,3233]
3HSAR000030543_CR000186820 185	none	none	tgtatata [33,40]	none
3HSAR000046770_CR000637070 317	none	none	none	none
3HSAR000044688_CR000608834 843	gtag [559,562]	none	tgtatata [828,835]	none
3HSAR000012185_CR000074244 7160	atagt [721,725]/gtagt [2765,2769]/gtagt [2847,2851]/atagt [2927,2931]/atagt [3437,3441]/atagt [4294,4298]/atagt [4337,4341]/gtagt [4433,4437]/gtagt [4833,4837]/gtagt [4854,4858]/atagt [5340,5344]/gtagt [5474,5478]/gtagt [6406,6410]/gtttagt [6619,6625]	ttttat [558,563]/ttttat [577,582]/ttttat [1019,1024]/ttttat [1306,1311]/ttttat [1493,1498]/ttttat [2465,2470]/ttttat [2566,2571]/ttttat [2577,2582]/ttttat [2773,2778]/ttttat [4400,4405]/ttttat [4518,4523]/ttttat [4976,4981]/ttttat [5243,5248]/ttttat [5276,5281]/ttttat [5924,5929]/ttttat [6029,6034]/ttttat [6397,6402]/ttttat [6859,6864]/ttttaat [6871,6877]	tgtaaata [3199,3206]/tgtagata [5428,5435]	tttatct [1307,1313]/attgtct [1902,1908]/tttatct [2578,2584]/attgtct [4776,4782]/tttatct [6077,6083]
3HSAR000021615_CR000132417 522	none	none	none	none
3HSAR000060418_CR001379274 28	none	none	none	none
3HSAR000046804_CR000637293 149	none	ttttaat [119,125]	none	none
3HSAR000048972_CR000725004 198	none	none	none	attgtct [100,106]
3HSAR000050050_CR000732975 4198	gtagt [3180,3184]/atagt [3479,3483]/gtagt [4078,4082]	ttttat [1790,1795]/ttttat [3089,3094]/ttttat [3757,3762]	none	none
3HSAR000032104_CR000196254 195	gttagt [168,173]	none	none	none
3HSAR000063342_CR001399598 2823	gtagt [273,277]/gttagt [1256,1261]/gttagt [2503,2508]	ttttat [237,242]/ttttat [2147,2152]/ttttat [2216,2221]/ttttaagt [2784,2791]	none	attatct [2479,2485]
3HSAR000051679_CR000744625 2040	gtagt [463,467]/atagt [1451,1455]/attagt [1851,1856]	ttttaat [284,290]/ttttaat [1206,1212]	tgtacata [1446,1453]	attatct [329,335]/attgtct [1814,1820]/tttgtct [1976,1982]
3HSAR000059458_CR001373334 20	none	none	none	none
3HSAR000016878_CR000103244 1406	gtag [299,302]/gtag [752,755]/gtag [990,993]/gtag [1141,1144]/gtag [1312,1315]	none	none	tttgtct [1205,1211]
3HSAR000005934_CR000036904 74	none	none	none	none
3HSAR000061298_CR001385041 373	gtagt [330,334]	none	none	none
3HSAR000060508_CR001379912 204	none	none	none	none
3HSAR000042542_CR000592479 1127	gtag [497,500]/gtag [770,773]	none	none	none
3HSAR000061948_CR001389657 555	atagt [219,223]/gtag [241,244]/gtag [461,464]	ttttat [362,367]/ttttat [471,476]	none	none
3HSAR000062164_CR001391202 1180	gtag [372,375]	ttttat [1118,1123]	none	none
3HSAR000058364_CR001261251 1146	gtagt [143,147]/atagt [644,648]/atagt [1042,1046]	ttttat [161,166]/ttttat [583,588]/ttttat [826,831]	none	none
3HSAR000025092_CR000153542 163	gtag [103,106]	none	none	none
3HSAR000015898_CR000097137 1038	gtagt [862,866]/atagt [974,978]	none	none	none
3HSAR000014437_CR000088124 1519	atagt [196,200]/gtagt [560,564]/gtagt [949,953]/gtag [1394,1397]/gtag [1486,1489]	ttttat [442,447]/ttttat [974,979]	tgtaaata [894,901]/tgtaaata [1071,1078]	attgtct [296,302]
3HSAR000065174_CR001412890 1091	gtagt [472,476]	ttttaat [404,410]	none	none
3HSAR000013077_CR000079670 2395	gtagt [342,346]/atagt [1321,1325]/gtagt [1688,1692]/atagt [1869,1873]/atagt [1914,1918]	ttttat [676,681]/ttttat [721,726]/ttttat [1636,1641]/ttttat [2066,2071]	none	tttatct [677,683]
3HSAR000030175_CR000184535 655	atagt [228,232]/gtag [475,478]	ttttat [209,214]/ttttat [234,239]	none	none
3HSAR000051759_CR000745217 872	gtag [415,418]/gtag [600,603]	none	none	none
3HSAR000017732_CR000108517 311	none	ttttcat [80,86]	none	none
3HSAR000045927_CR000630728 2579	gtagt [274,278]/atagt [1741,1745]/gttagt [2311,2316]	ttttat [813,818]/ttttaat [1683,1689]	tgtacata [1728,1735]	none
3HSAR000025378_CR000155294 661	attagt [38,43]/gtag [495,498]	none	none	tttgtct [623,629]
3HSAR000031790_CR000194343 304	atagt [111,115]/gtag [180,183]	none	none	none
3HSAR000057920_CR001257877 1588	atagt [914,918]/atagt [1134,1138]/gtagt [1166,1170]/gtagt [1492,1496]	ttttat [647,652]/ttttat [817,822]/ttttat [1061,1066]/ttttcat [1532,1538]	none	none
3HSAR000005793_CR000036047 983	atagt [567,571]/gttagt [656,661]/gttagt [969,974]	ttttaat [774,780]	none	attgtct [899,905]
3HSAR000063817_CR001402941 2033	atagt [549,553]/gtagt [1482,1486]/gtagt [1505,1509]/atagt [1563,1567]/atagt [1999,2003]	ttttat [421,426]/ttttat [1039,1044]/ttttat [1107,1112]/ttttat [1265,1270]/ttttat [1309,1314]/ttttat [1337,1342]/ttttat [1878,1883]	none	tttatct [1200,1206]/tttgtct [1326,1332]
3HSAR000048942_CR000724786 654	gtag [108,111]	ttttat [514,519]/ttttat [548,553]/ttttat [615,620]	none	none
3HSAR000017564_CR000107492 1496	gttagt [928,933]/gtag [1357,1360]	ttttat [241,246]/ttttat [427,432]	none	tttgtct [1093,1099]
3HSAR000030980_CR000189453 577	gtag [503,506]	none	none	none
3HSAR000058363_CR001261245 838	none	ttttat [806,811]	none	tttatct [807,813]
3HSAR000038752_CR000250988 360	gttagt [262,267]/gtag [285,288]	ttttaat [130,136]	none	attatct [43,49]
3HSAR000057704_CR001256212 151	none	none	none	none
3HSAR000005661_CR000035243 119	none	none	none	none
3HSAR000010321_CR000063100 1128	atagt [779,783]	ttttact [679,685]	none	none
3HSAR000026852_CR000164329 3530	atagt [230,234]/atagt [962,966]/gtagt [1224,1228]/atagt [1340,1344]/gtagt [1486,1490]/gtagt [1740,1744]/gtagt [2407,2411]/atagt [2629,2633]/gtag [2985,2988]/gtag [3057,3060]/gtag [3077,3080]/gtag [3149,3152]	ttttat [741,746]/ttttat [985,990]/ttttat [2512,2517]/ttttat [2680,2685]/ttttat [2955,2960]/ttttaaat [3302,3309]	tgtaaata [448,455]/tgtaaata [476,483]/tgtaaata [3288,3295]	attgtct [279,285]/attatct [515,521]/tttgtct [1324,1330]
3HSAR000022375_CR000136988 366	none	none	none	none
3HSAR000010199_CR000062360 1496	gtag [575,578]	none	none	none
3HSAR000022589_CR000138302 742	atagt [8,12]/atagt [271,275]/gtttagt [323,329]	none	none	none
3HSAR000007539_CR000046672 593	atagt [116,120]/gtag [512,515]	ttttat [565,570]	none	none
3HSAR000016691_CR000102079 22	none	none	none	none
3HSAR000049291_CR000727398 512	gttagt [272,277]/gtag [309,312]	ttttat [379,384]	none	none
3HSAR000000923_CR000005731 17	none	none	none	none
3HSAR000036865_CR000237519 6968	gtagt [3,7]/gtagt [743,747]/gtagt [883,887]/gtagt [975,979]/atagt [1023,1027]/gtagt [1305,1309]/gtagt [1388,1392]/gtagt [1463,1467]/gtagt [1981,1985]/atagt [2313,2317]/gtagt [3018,3022]/atagt [3430,3434]/gtagt [3494,3498]/atagt [3789,3793]/gtagt [4007,4011]/gtagt [4065,4069]/gtagt [4530,4534]/atagt [4948,4952]/gtagt [5515,5519]/atagt [5877,5881]/atagt [5953,5957]/gtagt [6650,6654]/attagt [6661,66…	ttttat [2167,2172]/ttttat [3264,3269]/ttttat [3282,3287]/ttttat [3668,3673]/ttttat [3838,3843]/ttttat [4191,4196]/ttttat [5037,5042]/ttttat [6523,6528]/ttttact [6821,6827]	none	attatct [3744,3750]/attgtct [4166,4172]
3HSAR000001465_CR000009117 544	atagt [120,124]/gtagt [371,375]	ttttat [167,172]/ttttat [192,197]/ttttaaat [336,343]/ttttaagt [516,523]	tgtatata [102,109]	tttgtct [491,497]
3HSAR000047398_CR000641521 83	none	none	none	none
3HSAR000042101_CR000588824 270	none	ttttat [231,236]	none	none
3HSAR000039189_CR000254163 2366	gtagt [761,765]/atagt [927,931]/atagt [1053,1057]/atagt [1323,1327]/atagt [1468,1472]/atagt [1702,1706]/gtagt [2000,2004]	ttttat [754,759]/ttttat [1031,1036]/ttttat [1262,1267]/ttttat [1337,1342]/ttttat [1356,1361]/ttttat [1635,1640]/ttttat [1715,1720]/ttttat [1992,1997]/ttttaat [2120,2126]/ttttaaat [2134,2141]	tgtacata [354,361]/tgtatata [822,829]	tttatct [1114,1120]
3HSAR000052047_CR000747338 81	none	none	none	none
3HSAR000002308_CR000014449 1505	gtag [507,510]/gtag [664,667]/gtag [735,738]/gtag [766,769]/gtag [1014,1017]	none	none	none
3HSAR000048649_CR000722504 3553	gtagt [1032,1036]/atagt [1412,1416]/atagt [1762,1766]/gttagt [2838,2843]/gtttagt [3048,3054]/gtag [3227,3230]	ttttat [427,432]/ttttat [986,991]/ttttat [1642,1647]/ttttat [2308,2313]/ttttat [3138,3143]/ttttat [3280,3285]	tgtacata [515,522]	tttatct [987,993]
3HSAR000049145_CR000726299 775	gtag [227,230]/gtag [505,508]	ttttcat [146,152]	none	none
3HSAR000050527_CR000736523 1090	atagt [941,945]	none	none	tttgtct [161,167]
3HSAR000012081_CR000073615 2433	gtag [377,380]/gtag [688,691]/gtag [1117,1120]/gtag [1674,1677]	none	none	none
3HSAR000015556_CR000095030 831	gtag [534,537]/gtag [562,565]	ttttaaat [383,390]/ttttcat [541,547]	none	attgtct [139,145]
3HSAR000019525_CR000119489 351	none	none	none	none
3HSAR000014022_CR000085539 689	atagt [95,99]/atagt [163,167]/atagt [272,276]/atagt [527,531]/gtag [536,539]	ttttat [138,143]/ttttaat [293,299]/ttttaat [465,471]	none	tttatct [25,31]
3HSAR000057522_CR001254852 1330	gtagt [389,393]/atagt [573,577]/gtag [1008,1011]	ttttat [877,882]/ttttat [1015,1020]/ttttcat [1077,1083]	none	tttatct [112,118]
3HSAR000026003_CR000159126 442	none	none	none	none
3HSAR000003218_CR000020282 577	gtag [226,229]	ttttaaat [567,574]	none	none
3HSAR000024506_CR000149931 260	gtagt [226,230]	none	none	none
3HSAR000003585_CR000022565 925	atagt [27,31]/atagt [383,387]/gtagt [766,770]/atagt [920,924]	ttttat [314,319]	tgtagata [344,351]	none
3HSAR000048967_CR000724971 503	none	ttttcat [85,91]	none	none
3HSAR000050169_CR000733849 529	gtag [102,105]	ttttat [437,442]	none	none
3HSAR000007119_CR000044176 3031	atagt [884,888]/gtagt [1347,1351]/gtagt [2892,2896]	ttttat [1622,1627]/ttttat [2488,2493]/ttttat [2555,2560]/ttttat [2805,2810]/ttttat [2934,2939]/ttttat [2945,2950]	tgtaaata [1156,1163]	tttgtct [1243,1249]/tttgtct [1358,1364]/attatct [2790,2796]
3HSAR000014432_CR000088092 1519	atagt [196,200]/gtagt [560,564]/gtagt [949,953]/gtag [1394,1397]/gtag [1486,1489]	ttttat [442,447]/ttttat [974,979]	tgtaaata [894,901]/tgtaaata [1071,1078]	attgtct [296,302]
3HSAR000038712_CR000250689 370	none	ttttact [303,309]	none	none
3HSAR000064235_CR001405940 1122	gtag [11,14]/gtag [924,927]	ttttat [234,239]/ttttat [619,624]/ttttaat [831,837]/ttttaagt [896,903]	none	none
3HSAR000062906_CR001396491 332	gtag [35,38]	none	none	none
3HSAR000025441_CR000155697 369	none	none	none	none
3HSAR000048631_CR000722311 93	none	none	none	none
3HSAR000004554_CR000028476 4212	gtagt [352,356]/gtagt [841,845]/gtagt [1597,1601]/gtagt [1974,1978]/atagt [1984,1988]/atagt [2392,2396]/atagt [2513,2517]/atagt [2852,2856]/gttagt [3745,3750]/atttagt [4095,4101]	ttttat [230,235]/ttttat [3666,3671]/ttttat [3936,3941]/ttttat [3962,3967]/ttttat [4027,4032]/ttttat [4111,4116]	tgtatata [1411,1418]	tttgtct [2087,2093]/tttgtct [2866,2872]/tttgtct [3131,3137]/tttatct [3963,3969]
3HSAR000060972_CR001382684 1600	atagt [1166,1170]/gtag [1347,1350]	ttttat [456,461]/ttttat [710,715]/ttttat [805,810]	tgtatata [717,724]	tttatct [457,463]
3HSAR000039082_CR000253377 1486	gtagt [75,79]/gtagt [112,116]/atagt [251,255]/gtagt [761,765]/atagt [784,788]/gtagt [909,913]/atagt [1170,1174]	ttttat [286,291]/ttttat [598,603]/ttttat [1029,1034]/ttttat [1253,1258]/ttttat [1262,1267]/ttttat [1444,1449]	tgtaaata [1436,1443]	attatct [670,676]
3HSAR000004936_CR000030789 1595	gtagt [206,210]/gtagt [1343,1347]/gtagt [1525,1529]	ttttat [781,786]/ttttat [1067,1072]/ttttaaat [1335,1342]	tgtaaata [549,556]	tttatct [58,64]/attatct [199,205]
3HSAR000015512_CR000094750 1649	gtagt [1304,1308]/gtag [1447,1450]/gtag [1488,1491]	ttttat [1273,1278]	none	none
3HSAR000039562_CR000257040 1289	gtagt [373,377]/atagt [392,396]/atagt [689,693]	ttttat [526,531]/ttttat [901,906]/ttttat [1095,1100]	tgtacata [359,366]	tttatct [572,578]/tttgtct [984,990]/attgtct [991,997]/attatct [1179,1185]
3HSAR000003212_CR000020244 99	none	none	none	none
3HSAR000015581_CR000095189 2949	atagt [72,76]/atagt [2505,2509]	ttttat [2626,2631]/ttttaaat [2648,2655]/ttttaagt [2704,2711]	tgtatata [104,111]/tgtacata [2410,2417]	tttatct [515,521]
3HSAR000020965_CR000128379 20	none	none	none	none
3HSAR000027119_CR000165961 180	gttagt [83,88]/gttagt [94,99]	none	tgtaaata [155,162]	none
3HSAR000060172_CR001377647 2272	gtagt [2091,2095]/gttagt [2141,2146]	ttttat [315,320]/ttttat [1013,1018]	none	none
3HSAR000050483_CR000736188 802	atagt [261,265]/gtagt [460,464]/gtag [484,487]/gtag [783,786]	ttttat [324,329]	tgtatata [357,364]	attgtct [703,709]
3HSAR000059905_CR001376133 516	gtag [404,407]	ttttat [473,478]	none	none
3HSAR000033525_CR000207660 516	gtagt [49,53]/atagt [338,342]/gtag [430,433]	ttttaat [243,249]/ttttaat [408,414]	none	attatct [144,150]
3HSAR000028088_CR000171808 657	gtag [371,374]	ttttaat [310,316]	none	none
3HSAR000029805_CR000182248 296	none	none	none	none
3HSAR000049466_CR000728650 459	gtag [21,24]/gtag [217,220]	none	none	none
3HSAR000053296_CR000762984 413	gtag [95,98]	none	none	none
3HSAR000064945_CR001411187 1281	atagt [736,740]/gtag [973,976]	none	none	none
3HSAR000062361_CR001392626 1284	atagt [937,941]/atagt [1070,1074]	ttttat [1175,1180]	none	none
3HSAR000062662_CR001394733 5427	gtagt [383,387]/gtagt [722,726]/atagt [1051,1055]/atagt [1954,1958]/atagt [2737,2741]/gtagt [3675,3679]/gtagt [4035,4039]/atagt [4946,4950]/gtag [5220,5223]	ttttat [1125,1130]/ttttat [1203,1208]/ttttaaat [1419,1426]/ttttact [1998,2004]/ttttact [4860,4866]/ttttact [5200,5206]	none	attgtct [3775,3781]/tttgtct [3829,3835]/attgtct [5351,5357]
3HSAR000038499_CR000249027 32	none	ttttact [23,29]	none	none
3HSAR000007058_CR000043818 1190	atagt [211,215]/atagt [798,802]/atagt [920,924]	ttttat [74,79]/ttttat [294,299]/ttttat [1009,1014]/ttttat [1097,1102]	none	none
3HSAR000015193_CR000092752 591	atagt [361,365]	ttttat [234,239]/ttttcat [324,330]	none	none
3HSAR000045389_CR000626591 356	gtagt [260,264]	ttttat [40,45]	none	none
3HSAR000054718_CR000793778 804	gtag [454,457]	ttttat [132,137]/ttttaat [720,726]	none	none
3HSAR000052222_CR000748764 418	gtag [161,164]	none	none	none
3HSAR000041703_CR000584872 500	atagt [316,320]/gtag [368,371]/gtag [391,394]	none	none	none
3HSAR000020840_CR000127602 1127	gtag [30,33]/gtag [135,138]/gtag [331,334]/gtag [386,389]/gtag [628,631]/gtag [683,686]/gtag [850,853]/gtag [1064,1067]	ttttat [811,816]/ttttat [1086,1091]	none	none
3HSAR000038347_CR000247963 113	gtag [39,42]	none	none	none
3HSAR000000834_CR000005206 906	gtagt [610,614]/atagt [773,777]	none	none	none
3HSAR000055216_CR000797367 1242	atagt [385,389]/gtag [699,702]	ttttat [404,409]/ttttat [785,790]/ttttat [1108,1113]/ttttat [1165,1170]	none	attgtct [304,310]
3HSAR000029105_CR000177982 603	atagt [428,432]/gtagt [480,484]	ttttaat [572,578]	none	none
3HSAR000045919_CR000630669 2579	gtagt [274,278]/atagt [1741,1745]/gttagt [2311,2316]	ttttat [813,818]/ttttaat [1683,1689]	tgtacata [1728,1735]	none
3HSAR000025711_CR000157341 354	gtag [261,264]	none	none	none
3HSAR000001473_CR000009165 677	gtag [287,290]	none	none	none
3HSAR000008784_CR000053873 90	none	none	none	none
3HSAR000039204_CR000254275 457	none	none	none	none
3HSAR000024112_CR000147543 3458	atagt [3314,3318]	ttttat [918,923]/ttttat [3206,3211]	none	attatct [1583,1589]
3HSAR000034839_CR000218139 2771	atagt [160,164]/atagt [915,919]/atagt [994,998]/gtagt [1130,1134]/atagt [1352,1356]/gtag [1707,1710]/gtag [2001,2004]/gtag [2189,2192]	ttttat [388,393]/ttttat [1359,1364]/ttttat [1936,1941]/ttttat [2335,2340]/ttttaat [2361,2367]/ttttaat [2373,2379]/ttttaat [2414,2420]	tgtatata [989,996]/tgtatata [2125,2132]	attatct [1224,1230]/tttatct [1685,1691]/tttgtct [1847,1853]/tttgtct [2156,2162]
3HSAR000057098_CR001251913 1708	gtagt [833,837]/gtag [1269,1272]	ttttat [1246,1251]	none	none
3HSAR000048147_CR000718645 585	attagt [21,26]/gtag [459,462]	none	none	none
3HSAR000055785_CR001047337 534	atagt [527,531]	none	none	none
3HSAR000022426_CR000137293 4903	atagt [625,629]/gtagt [1342,1346]/gtagt [2093,2097]/gtagt [3118,3122]/gtagt [3129,3133]/atagt [3137,3141]/atagt [3306,3310]/atagt [3845,3849]/atagt [3878,3882]/gtag [4575,4578]	ttttat [89,94]/ttttat [216,221]/ttttat [1093,1098]/ttttat [2550,2555]/ttttat [2565,2570]/ttttat [2761,2766]/ttttat [4486,4491]/ttttat [4654,4659]/ttttat [4667,4672]/ttttat [4797,4802]/ttttat [4885,4890]	tgtacata [1181,1188]/tgtacata [2974,2981]	none
3HSAR000009456_CR000057914 140	atttagt [60,66]	ttttat [37,42]/ttttaat [108,114]	none	none
3HSAR000064599_CR001408621 327	gttagt [275,280]	ttttat [319,324]	none	none
3HSAR000052761_CR000752632 2913	atagt [1931,1935]/atagt [2349,2353]/gtttagt [2725,2731]	ttttat [344,349]/ttttat [365,370]/ttttat [502,507]/ttttat [2265,2270]/ttttat [2710,2715]/ttttat [2805,2810]	tgtagata [2319,2326]	none
3HSAR000039332_CR000255263 1432	gtagt [292,296]/atagt [1066,1070]	ttttat [399,404]/ttttat [1194,1199]	none	none
3HSAR000004540_CR000028393 1148	gtag [195,198]/gtag [579,582]	none	none	none
3HSAR000032711_CR000200180 475	none	none	none	none
3HSAR000006006_CR000037350 487	gtag [334,337]	ttttaaat [196,203]	tgtaaata [186,193]	none
3HSAR000052760_CR000752623 142	none	none	none	none
3HSAR000058211_CR001260083 2872	attagt [275,280]/attagt [902,907]/gtag [1662,1665]/gtag [2498,2501]/gtag [2571,2574]	ttttat [37,42]/ttttat [461,466]/ttttat [2109,2114]	tgtacata [1008,1015]/tgtatata [2589,2596]	attgtct [183,189]
3HSAR000051987_CR000746884 1108	gtagt [7,11]/gtagt [240,244]/atagt [590,594]/gtagt [873,877]/gtagt [1104,1108]	ttttat [268,273]/ttttat [434,439]/ttttaat [460,466]	none	tttatct [269,275]
3HSAR000057096_CR001251901 1765	gtagt [387,391]/gtagt [852,856]/atagt [862,866]/gtagt [1246,1250]/gtag [1436,1439]	ttttat [254,259]/ttttat [281,286]/ttttat [499,504]/ttttaat [505,511]/ttttaat [1626,1632]/ttttaat [1753,1759]	none	tttgtct [939,945]
3HSAR000047006_CR000638749 1192	atagt [584,588]/gtag [674,677]/gtag [703,706]/gtag [947,950]/gtag [1159,1162]	ttttat [536,541]/ttttat [588,593]/ttttat [606,611]/ttttat [777,782]/ttttat [846,851]/ttttat [959,964]	none	tttatct [289,295]
3HSAR000031025_CR000189729 330	gtagt [10,14]/gtagt [187,191]	ttttat [139,144]/ttttat [294,299]/ttttat [302,307]	none	none
3HSAR000036460_CR000234563 345	none	none	none	none
3HSAR000004472_CR000027985 1630	gtag [168,171]/gtag [821,824]/gtag [1330,1333]/gtag [1392,1395]	none	none	tttgtct [791,797]/attgtct [1365,1371]
3HSAR000065831_CR001631474 850	gtagt [738,742]/atagt [760,764]/gtag [799,802]	none	none	none
3HSAR000049898_CR000731871 245	none	ttttaagt [228,235]	none	none
3HSAR000028220_CR000172614 639	gtag [409,412]	ttttcat [275,281]	tgtaaata [512,519]	attgtct [18,24]
3HSAR000054361_CR000790551 2183	atagt [907,911]/gtag [1019,1022]/gtag [1574,1577]/gtag [1933,1936]/gtag [2154,2157]	ttttat [518,523]	none	tttgtct [459,465]/attgtct [1423,1429]
3HSAR000042206_CR000589869 793	gtag [603,606]	none	none	none
3HSAR000050249_CR000734445 2385	atagt [131,135]/atagt [1065,1069]/gtagt [1126,1130]/gtag [1249,1252]/gtag [1273,1276]/gtag [1724,1727]	ttttat [624,629]/ttttat [1104,1109]/ttttat [1120,1125]	none	none
3HSAR000032333_CR000197695 67	none	none	none	none
3HSAR000042864_CR000594930 1789	gtagt [928,932]/atagt [1275,1279]/atagt [1283,1287]/atagt [1311,1315]/gtagt [1366,1370]	ttttat [1773,1778]	tgtatata [1753,1760]	tttatct [908,914]
3HSAR000040203_CR000261899 146	none	none	none	none
3HSAR000003522_CR000022168 796	gtag [541,544]	ttttaat [499,505]	none	tttgtct [639,645]
3HSAR000002288_CR000014327 275	none	none	none	none
3HSAR000018671_CR000114306 880	gtagt [854,858]	ttttat [194,199]/ttttaat [515,521]/ttttaagt [726,733]	none	none
3HSAR000008624_CR000052929 235	none	ttttat [62,67]	none	none
3HSAR000063803_CR001402836 150	none	none	none	none
3HSAR000033724_CR000209112 708	gtag [97,100]	ttttat [530,535]	none	none
3HSAR000064634_CR001408871 1036	atagt [337,341]/gtagt [855,859]	ttttat [34,39]/ttttaaat [1012,1019]	none	none
3HSAR000020964_CR000128373 78	none	none	none	none
3HSAR000004202_CR000026313 1647	gtagt [704,708]/gtag [1160,1163]	none	none	attgtct [1226,1232]/attatct [1238,1244]
3HSAR000064518_CR001407987 2510	gtagt [271,275]/gtagt [893,897]/gtagt [1319,1323]/atagt [1757,1761]/atagt [2139,2143]/atagt [2171,2175]	ttttat [76,81]/ttttat [844,849]/ttttat [1936,1941]/ttttat [2001,2006]/ttttat [2019,2024]/ttttaat [2296,2302]	tgtacata [722,729]/tgtaaata [2302,2309]	attgtct [1463,1469]/tttatct [2245,2251]
3HSAR000052883_CR000753500 78	none	ttttaagt [46,53]	none	none
3HSAR000015956_CR000097509 389	none	none	none	none
3HSAR000026582_CR000162675 4707	gtagt [1686,1690]/gtagt [2350,2354]/gtagt [4620,4624]/gtag [4656,4659]	ttttat [1869,1874]/ttttat [4383,4388]/ttttaat [4551,4557]	tgtacata [1919,1926]	attgtct [732,738]
3HSAR000038433_CR000248565 2395	gtagt [342,346]/atagt [1321,1325]/gtagt [1688,1692]/atagt [1869,1873]/atagt [1914,1918]	ttttat [676,681]/ttttat [721,726]/ttttat [1636,1641]/ttttat [2066,2071]	none	tttatct [677,683]
3HSAR000000141_CR000000881 243	atagt [44,48]/gtagt [53,57]/gtag [92,95]/gtag [147,150]	none	none	none
3HSAR000062210_CR001391536 743	gtagt [343,347]	none	none	none
3HSAR000006280_CR000039069 2795	atagt [87,91]/atagt [123,127]/gtagt [254,258]/atagt [458,462]/atagt [550,554]/gtagt [769,773]/atagt [1199,1203]/gtagt [2259,2263]/atagt [2276,2280]	ttttat [1081,1086]/ttttat [1805,1810]/ttttat [2750,2755]	tgtatata [378,385]/tgtatata [1358,1365]	attgtct [318,324]/attgtct [350,356]
3HSAR000053898_CR000786125 399	gtag [44,47]	ttttaat [287,293]/ttttaat [339,345]	none	none
3HSAR000008400_CR000051553 2132	atagt [1102,1106]/attagt [1603,1608]/gtag [1912,1915]	ttttat [976,981]/ttttat [1177,1182]/ttttat [1326,1331]/ttttaat [1458,1464]/ttttaat [2053,2059]	none	attatct [1677,1683]
3HSAR000003708_CR000023291 62	none	none	none	none
3HSAR000037167_CR000239664 2391	atagt [347,351]/gtagt [775,779]/atagt [1183,1187]/atagt [1684,1688]/gtagt [1815,1819]/gtagt [1901,1905]	ttttat [1124,1129]/ttttat [1323,1328]/ttttat [1459,1464]/ttttat [1905,1910]/ttttat [2047,2052]/ttttaaat [2344,2351]	none	none
3HSAR000021095_CR000129197 1764	atagt [567,571]/atagt [588,592]/atagt [1187,1191]/atagt [1321,1325]/gtagt [1640,1644]/attagt [1673,1678]	ttttat [454,459]/ttttat [460,465]/ttttat [584,589]/ttttat [717,722]/ttttat [737,742]/ttttat [754,759]/ttttat [909,914]/ttttat [966,971]/ttttat [1045,1050]/ttttat [1101,1106]/ttttat [1256,1261]/ttttaat [1455,1461]	none	attgtct [1136,1142]/tttgtct [1172,1178]/tttatct [1257,1263]
3HSAR000029447_CR000180041 2727	gtag [503,506]/gtag [1633,1636]/gtag [1757,1760]/gtag [1983,1986]	ttttat [806,811]/ttttat [2682,2687]	tgtagata [1632,1639]	none
3HSAR000064434_CR001407364 497	gtag [466,469]	none	none	none
3HSAR000013616_CR000082989 3417	atagt [146,150]/atagt [266,270]/atagt [346,350]/gtagt [2808,2812]/gtagt [3012,3016]/attagt [3159,3164]/gtag [3285,3288]	ttttat [1013,1018]/ttttat [1082,1087]/ttttat [2145,2150]/ttttat [2724,2729]/ttttat [2917,2922]/ttttat [2925,2930]/ttttat [3267,3272]/ttttat [3353,3358]	none	attgtct [3039,3045]
3HSAR000050163_CR000733811 5206	gtagt [1105,1109]/atagt [2223,2227]/atagt [2246,2250]/gtagt [2781,2785]/atagt [3020,3024]/gtagt [4449,4453]/gtagt [5156,5160]/gtag [5163,5166]	ttttat [516,521]/ttttat [1465,1470]/ttttat [2165,2170]/ttttat [2421,2426]/ttttaat [5194,5200]	none	tttgtct [666,672]/attgtct [1620,1626]/tttgtct [2767,2773]/tttatct [3791,3797]/tttgtct [4058,4064]/tttgtct [5087,5093]
3HSAR000047755_CR000715518 1684	gtagt [209,213]/atagt [616,620]/atagt [1235,1239]/gtag [1327,1330]/gtag [1514,1517]	ttttat [174,179]/ttttat [589,594]/ttttat [851,856]/ttttat [1316,1321]	tgtacata [823,830]/tgtatata [1447,1454]	tttgtct [935,941]
3HSAR000025457_CR000155794 3459	gtagt [1134,1138]/gtagt [1284,1288]/atagt [2948,2952]	ttttact [3329,3335]	none	attatct [1017,1023]/tttgtct [2856,2862]
3HSAR000058412_CR001261617 366	none	none	none	none
3HSAR000035039_CR000219596 3880	atagt [619,623]/gtagt [1493,1497]/atagt [1534,1538]/gttagt [1555,1560]/atttagt [2959,2965]/gtag [3164,3167]	ttttat [1760,1765]/ttttat [2253,2258]/ttttact [3117,3123]	tgtaaata [1884,1891]	attgtct [872,878]/tttatct [1761,1767]
3HSAR000003752_CR000023554 22	none	none	none	none
3HSAR000002189_CR000013692 1010	atagt [779,783]	ttttat [583,588]/ttttat [754,759]/ttttat [925,930]/ttttaat [983,989]	none	none
3HSAR000046698_CR000636585 609	gtag [317,320]/gtag [458,461]/gtag [513,516]	ttttat [146,151]	none	none
3HSAR000016401_CR000100277 838	atagt [650,654]	ttttat [803,808]	none	none
3HSAR000044661_CR000608620 3223	atagt [204,208]/atagt [663,667]/gtagt [820,824]/atagt [1029,1033]/gtagt [1387,1391]/atagt [1588,1592]/gtagt [2711,2715]	ttttat [127,132]/ttttat [465,470]/ttttat [545,550]/ttttat [1396,1401]/ttttat [1607,1612]/ttttat [2007,2012]/ttttat [2982,2987]/ttttat [3019,3024]/ttttat [3098,3103]	none	tttgtct [298,304]/attatct [1307,1313]
3HSAR000001295_CR000008041 2713	atagt [1218,1222]/atagt [1540,1544]/gtagt [1738,1742]/atagt [1853,1857]/atagt [2072,2076]/gtag [2304,2307]	ttttat [227,232]/ttttat [2267,2272]/ttttat [2688,2693]	tgtagata [1629,1636]	tttatct [2268,2274]/attatct [2358,2364]
3HSAR000036469_CR000234628 1356	atagt [208,212]/atagt [535,539]/atagt [593,597]/atagt [722,726]/gtagt [1229,1233]	ttttat [1045,1050]/ttttaat [1345,1351]	none	none
3HSAR000043053_CR000596379 267	gtagt [44,48]/gtag [181,184]	none	none	tttgtct [204,210]
3HSAR000000873_CR000005439 301	gtag [52,55]/gtag [148,151]	ttttcat [33,39]	none	attatct [22,28]
3HSAR000009946_CR000060851 1308	atagt [1157,1161]	none	tgtaaata [124,131]	tttgtct [772,778]
3HSAR000021438_CR000131321 238	gtag [99,102]	none	none	none
3HSAR000002931_CR000018475 316	atagt [239,243]	none	none	none
3HSAR000061831_CR001388849 985	atagt [57,61]/atagt [507,511]/gtag [858,861]	ttttat [388,393]/ttttat [405,410]/ttttat [913,918]	none	none
3HSAR000051840_CR000745788 3428	gttagt [599,604]/gttagt [2674,2679]/gttagt [2820,2825]	ttttat [2338,2343]/ttttaat [2613,2619]	none	none
3HSAR000048263_CR000719503 920	atagt [619,623]	ttttat [826,831]/ttttaat [835,841]	none	none
3HSAR000027723_CR000169611 247	gtag [116,119]	none	none	none
3HSAR000030340_CR000185567 123	none	ttttat [71,76]	none	none
3HSAR000016253_CR000099363 2872	attagt [275,280]/attagt [902,907]/gtag [1662,1665]/gtag [2498,2501]/gtag [2571,2574]	ttttat [37,42]/ttttat [461,466]/ttttat [2109,2114]	tgtacata [1008,1015]/tgtatata [2589,2596]	attgtct [183,189]
3HSAR000025643_CR000156930 768	gtag [202,205]/gtag [554,557]	ttttaagt [461,468]	none	none
3HSAR000052033_CR000747229 999	atagt [839,843]	ttttat [846,851]	tgtaaata [834,841]	none
3HSAR000030474_CR000186397 731	atagt [694,698]	ttttaat [689,695]	none	attgtct [306,312]
3HSAR000000384_CR000002317 140	none	none	none	none
3HSAR000003574_CR000022499 2875	atagt [429,433]/atagt [874,878]/gtag [2375,2378]	ttttat [1685,1690]/ttttaaat [1697,1704]/ttttcat [1971,1977]	none	tttgtct [117,123]/tttatct [1686,1692]
3HSAR000034414_CR000214450 4533	gtagt [1658,1662]/gtagt [1944,1948]/atagt [2184,2188]/atagt [3335,3339]/gtagt [3618,3622]/gtagt [3749,3753]/gtagt [4462,4466]	ttttat [722,727]/ttttat [1767,1772]/ttttat [2010,2015]/ttttat [2298,2303]/ttttat [3234,3239]	tgtacata [3005,3012]/tgtacata [3877,3884]	tttatct [1775,1781]/tttatct [2269,2275]/tttgtct [3037,3043]
3HSAR000061286_CR001384963 558	atagt [459,463]	ttttaat [298,304]	none	none
3HSAR000009270_CR000056811 2920	gtagt [580,584]/atagt [1378,1382]/atagt [1610,1614]/gtagt [1824,1828]/gtagt [2450,2454]/atagt [2650,2654]	ttttat [1008,1013]/ttttat [1523,1528]/ttttat [1720,1725]/ttttat [1797,1802]/ttttat [1999,2004]/ttttat [2574,2579]/ttttcat [2727,2733]	none	tttgtct [1776,1782]
3HSAR000040268_CR000267173 3506	atagt [1828,1832]/atagt [2159,2163]/atagt [2267,2271]/gtagt [2572,2576]/gtagt [2853,2857]/gtagt [3063,3067]/gtagt [3260,3264]	ttttat [601,606]/ttttat [1680,1685]/ttttat [2952,2957]/ttttat [3067,3072]	tgtaaata [220,227]/tgtaaata [3328,3335]	tttatct [627,633]
3HSAR000004263_CR000026686 5610	gtagt [724,728]/gtagt [1351,1355]/gtagt [2537,2541]/gtagt [3345,3349]/gtagt [3747,3751]/atagt [4452,4456]/gttagt [4660,4665]/gtag [5249,5252]	ttttat [2459,2464]/ttttat [3210,3215]/ttttat [3226,3231]/ttttaat [4122,4128]/ttttaat [5355,5361]	none	tttgtct [228,234]/tttgtct [1329,1335]/tttatct [4110,4116]/tttgtct [4463,4469]/tttgtct [4967,4973]
3HSAR000045385_CR000626564 563	gtag [354,357]	none	none	none
3HSAR000043754_CR000601565 5358	atagt [526,530]/atagt [1293,1297]/gtagt [1624,1628]/atagt [1946,1950]/gtagt [2503,2507]/atagt [3020,3024]/gtagt [3405,3409]/atagt [3600,3604]/atagt [3609,3613]/atagt [3860,3864]/gtagt [4059,4063]/atagt [4360,4364]/gtagt [4796,4800]	ttttat [238,243]/ttttat [293,298]/ttttat [927,932]/ttttat [2759,2764]/ttttat [2979,2984]/ttttat [2990,2995]/ttttat [3060,3065]/ttttat [3214,3219]/ttttat [3549,3554]/ttttat [3867,3872]/ttttaat [5095,5101]	tgtatata [1333,1340]	tttgtct [1824,1830]/tttgtct [4660,4666]
3HSAR000032317_CR000197570 134	none	none	none	tttatct [40,46]
3HSAR000020096_CR000122973 155	atagt [59,63]	none	none	none
3HSAR000050020_CR000732761 719	atttagt [380,386]	none	none	none
3HSAR000034249_CR000213171 558	atagt [88,92]	ttttat [202,207]	none	none
3HSAR000015829_CR000096703 3867	atagt [1634,1638]/atagt [1700,1704]/atttagt [3523,3529]	ttttat [241,246]/ttttat [392,397]/ttttat [573,578]/ttttat [744,749]/ttttat [1816,1821]/ttttat [3138,3143]/ttttat [3555,3560]	none	none
3HSAR000045165_CR000625307 979	atagt [593,597]/atagt [731,735]/gtag [758,761]/gtag [840,843]	ttttat [362,367]/ttttact [399,405]	tgtatata [543,550]	none
3HSAR000057061_CR001251678 1501	atagt [354,358]/gtagt [392,396]/atagt [404,408]/atagt [805,809]	ttttat [762,767]/ttttat [1223,1228]	tgtaaata [86,93]	attatct [647,653]/attatct [1291,1297]
3HSAR000054020_CR000787241 162	none	none	none	none
3HSAR000042266_CR000590342 857	gtagt [381,385]	ttttat [689,694]	none	none
3HSAR000008536_CR000052384 2104	atagt [1655,1659]/gtag [1710,1713]/gtag [1792,1795]	ttttat [791,796]/ttttat [841,846]/ttttat [1017,1022]/ttttat [1050,1055]/ttttat [1279,1284]/ttttat [1451,1456]	tgtacata [1518,1525]/tgtacata [1727,1734]	tttatct [846,852]
3HSAR000030017_CR000183563 860	gtag [554,557]/gtag [603,606]/gtag [708,711]	ttttaat [810,816]	none	none
3HSAR000002513_CR000015764 167	none	none	none	none
3HSAR000059171_CR001371324 468	gtag [232,235]	none	none	none
3HSAR000011984_CR000073030 360	none	ttttaagt [335,342]	none	none
3HSAR000019202_CR000117558 1201	atagt [844,848]	none	none	none
3HSAR000048553_CR000721722 2558	gtagt [328,332]/gtagt [1027,1031]/atagt [1667,1671]/gtagt [1795,1799]/gtag [1841,1844]/gtag [1957,1960]	ttttaat [2340,2346]	none	none
3HSAR000057052_CR001251610 539	gtag [4,7]	ttttat [384,389]/ttttaat [394,400]	none	none
3HSAR000039715_CR000258204 6253	atagt [87,91]/atagt [806,810]/atagt [1584,1588]/gtagt [2687,2691]/atagt [5452,5456]/atttagt [5540,5546]/gtag [5799,5802]	ttttat [2073,2078]/ttttat [2082,2087]/ttttat [2273,2278]/ttttat [3023,3028]	tgtaaata [1880,1887]/tgtaaata [4722,4729]	tttatct [2091,2097]/tttatct [3024,3030]/tttatct [3719,3725]/tttgtct [4455,4461]/attatct [5287,5293]/attgtct [5354,5360]
3HSAR000038141_CR000246523 1107	gtagt [317,321]/atagt [383,387]/atagt [564,568]/atagt [619,623]/atagt [963,967]/gtag [992,995]	ttttat [573,578]/ttttat [629,634]	none	none
3HSAR000024775_CR000151588 771	atttagt [657,663]	none	none	tttatct [444,450]
3HSAR000049520_CR000729032 3112	atagt [1220,1224]/atagt [1576,1580]/atagt [1846,1850]/atagt [1895,1899]/gtagt [2205,2209]/gtagt [2631,2635]/atagt [3066,3070]	ttttat [1969,1974]/ttttat [2100,2105]	none	none
3HSAR000032663_CR000199879 1147	attagt [56,61]	ttttcat [727,733]	none	none
3HSAR000055405_CR000798885 1674	atagt [558,562]/atagt [714,718]/atagt [1048,1052]/gtag [1187,1190]	ttttat [592,597]/ttttat [1110,1115]	none	none
3HSAR000060141_CR001377462 1027	none	none	none	tttgtct [438,444]
3HSAR000065384_CR001628938 1966	gtagt [643,647]/gtag [1225,1228]/gtag [1297,1300]	ttttat [1009,1014]	none	none
3HSAR000058835_CR001368985 2093	gtagt [818,822]/atagt [984,988]/atagt [1468,1472]/atagt [1648,1652]/gtagt [1742,1746]/gtagt [2017,2021]	ttttat [1618,1623]/ttttat [2042,2047]	none	attatct [1318,1324]
3HSAR000020038_CR000122600 412	attagt [299,304]	ttttat [255,260]/ttttaat [315,321]	none	none
3HSAR000065058_CR001412038 111	none	none	none	none
3HSAR000038695_CR000250573 337	atagt [311,315]	none	none	tttatct [329,335]
3HSAR000014722_CR000089855 1314	atagt [288,292]/atagt [453,457]/gtagt [1028,1032]/atagt [1055,1059]/attagt [1124,1129]/gtag [1290,1293]	ttttat [400,405]/ttttat [422,427]/ttttat [589,594]/ttttact [931,937]/ttttact [957,963]/ttttcat [1230,1236]	none	none
3HSAR000037198_CR000239885 617	attagt [38,43]/gtag [495,498]	none	none	none
3HSAR000004322_CR000027059 1908	atagt [70,74]/gtagt [752,756]/attagt [1700,1705]	ttttat [1211,1216]/ttttat [1853,1858]	none	none
3HSAR000041752_CR000585351 5275	gtagt [162,166]/gtagt [1069,1073]/gtagt [1161,1165]/gtagt [1268,1272]/gtagt [1572,1576]/atagt [1914,1918]/gtagt [4285,4289]/gtagt [4438,4442]/gtagt [4725,4729]/atagt [4773,4777]/atagt [4831,4835]	ttttat [968,973]/ttttat [1234,1239]/ttttat [2452,2457]/ttttat [3268,3273]/ttttat [4430,4435]/ttttaat [4885,4891]/ttttcat [5008,5014]	tgtacata [1442,1449]	tttatct [2604,2610]/attatct [4456,4462]
3HSAR000054363_CR000790567 2183	atagt [907,911]/gtag [1019,1022]/gtag [1574,1577]/gtag [1933,1936]/gtag [2154,2157]	ttttat [518,523]	none	tttgtct [459,465]/attgtct [1423,1429]
3HSAR000041856_CR000586291 447	gtag [351,354]	ttttat [53,58]/ttttcat [412,418]	tgtacata [35,42]	none
3HSAR000050984_CR000739740 2241	gtagt [2091,2095]	ttttat [830,835]/ttttat [895,900]/ttttat [2187,2192]	tgtatata [949,956]/tgtatata [973,980]	none
3HSAR000047315_CR000640959 455	gtagt [97,101]/gtag [409,412]	none	none	none
3HSAR000024192_CR000148015 457	gtagt [86,90]/gtagt [316,320]	ttttat [365,370]	none	none
3HSAR000037691_CR000243364 1618	gtagt [93,97]/gtagt [168,172]/atagt [412,416]/gtagt [478,482]/atagt [659,663]/atagt [915,919]/gtagt [1473,1477]	ttttat [236,241]/ttttat [1526,1531]/ttttat [1545,1550]	none	tttgtct [1057,1063]
3HSAR000054864_CR000794843 51	none	none	none	none
3HSAR000036559_CR000235258 636	atagt [87,91]/gtag [144,147]	ttttat [629,634]	none	none
3HSAR000018005_CR000110212 30	none	none	none	none
3HSAR000008061_CR000049634 84	none	none	none	none
3HSAR000019887_CR000121673 522	gttagt [163,168]/gtag [382,385]	ttttat [215,220]	none	none
3HSAR000065415_CR001629081 6398	atagt [346,350]/atagt [760,764]/gtagt [865,869]/gtagt [1151,1155]/atagt [1680,1684]/atagt [2351,2355]/atagt [2533,2537]/atagt [2894,2898]/atagt [3313,3317]/atagt [3734,3738]/atagt [3752,3756]/atagt [4388,4392]/atagt [5885,5889]/atagt [5970,5974]/attagt [6295,6300]/attagt [6357,6362]	ttttat [46,51]/ttttat [558,563]/ttttat [852,857]/ttttat [1774,1779]/ttttat [2411,2416]/ttttat [2834,2839]/ttttat [3657,3662]/ttttat [3707,3712]/ttttat [4090,4095]/ttttat [4122,4127]/ttttat [4637,4642]/ttttat [5433,5438]/ttttat [6187,6192]/ttttat [6291,6296]	tgtatata [614,621]/tgtaaata [753,760]/tgtaaata [2155,2162]/tgtatata [3366,3373]/tgtaaata [4007,4014]/tgtatata [6041,6048]	tttatct [4786,4792]
3HSAR000017642_CR000107968 313	none	none	none	none
3HSAR000013726_CR000083696 3313	atagt [2212,2216]/atagt [2361,2365]/atagt [2401,2405]/atagt [2761,2765]/gtag [2927,2930]	ttttat [1145,1150]/ttttaat [1463,1469]/ttttaat [2315,2321]/ttttcat [3179,3185]	tgtatata [2809,2816]	tttatct [946,952]/attatct [2698,2704]/tttgtct [2784,2790]/attatct [2900,2906]
3HSAR000025276_CR000154675 141	gtag [45,48]	none	none	none
3HSAR000058915_CR001369540 3047	atagt [19,23]/atagt [1183,1187]/atagt [1355,1359]/gtagt [1663,1667]/atagt [1964,1968]/atagt [2234,2238]/atagt [2360,2364]/gtagt [2451,2455]/gttagt [2471,2476]/gtag [2547,2550]	ttttat [598,603]/ttttat [785,790]/ttttat [1074,1079]/ttttat [1177,1182]/ttttat [1215,1220]/ttttat [1505,1510]/ttttat [1536,1541]/ttttat [1844,1849]/ttttat [2816,2821]/ttttat [2833,2838]/ttttact [2883,2889]	tgtagata [848,855]	attgtct [470,476]
3HSAR000036117_CR000232036 206	gtag [144,147]	ttttat [194,199]	none	none
3HSAR000020186_CR000123532 929	gtagt [347,351]/gtagt [846,850]	none	none	tttatct [254,260]
3HSAR000010826_CR000066120 1124	gtagt [489,493]/gtagt [520,524]/gtagt [586,590]	ttttat [947,952]	none	tttatct [635,641]/attgtct [1053,1059]
3HSAR000050146_CR000733680 518	gtag [448,451]	ttttaat [429,435]	tgtacata [469,476]	none
3HSAR000037147_CR000239520 186	none	ttttaat [102,108]	none	none
3HSAR000018783_CR000115002 2727	atagt [271,275]/gtagt [1120,1124]/atagt [1525,1529]/gtagt [1545,1549]/atagt [1949,1953]/atagt [2342,2346]/atagt [2439,2443]/gtag [2516,2519]/gtag [2694,2697]	ttttat [136,141]/ttttat [318,323]/ttttat [398,403]/ttttat [767,772]/ttttat [855,860]/ttttat [1874,1879]/ttttat [2099,2104]/ttttat [2262,2267]/ttttat [2681,2686]	none	none
3HSAR000002443_CR000015316 334	attagt [88,93]	none	none	attatct [307,313]
3HSAR000024735_CR000151347 1542	atagt [1017,1021]/atagt [1232,1236]/attagt [1298,1303]/attagt [1484,1489]	ttttat [633,638]/ttttat [705,710]/ttttat [721,726]/ttttat [916,921]/ttttat [1121,1126]/ttttat [1417,1422]	tgtatata [686,693]	none
3HSAR000033953_CR000210854 1119	atagt [765,769]/attagt [794,799]	ttttat [739,744]/ttttat [779,784]/ttttat [925,930]/ttttat [996,1001]/ttttaagt [1105,1112]	none	tttgtct [227,233]
3HSAR000023308_CR000142658 2127	gtagt [59,63]/atagt [412,416]/gtagt [1444,1448]/attagt [2121,2126]	ttttat [1223,1228]/ttttat [1766,1771]/ttttaat [1807,1813]	none	none
3HSAR000036053_CR000231584 1367	gtag [865,868]	none	none	none
3HSAR000057935_CR001257995 1644	attagt [1572,1577]	ttttat [169,174]/ttttaat [450,456]/ttttaaat [821,828]/ttttact [952,958]/ttttact [1519,1525]	tgtatata [1585,1592]	none
3HSAR000038302_CR000247654 1549	gtagt [1110,1114]/gtagt [1297,1301]/atagt [1498,1502]	ttttat [461,466]/ttttat [656,661]/ttttat [836,841]/ttttat [1402,1407]/ttttat [1526,1531]	none	tttatct [261,267]
3HSAR000016846_CR000103035 1019	gtagt [290,294]	ttttat [294,299]	none	none
3HSAR000025656_CR000157010 5062	atagt [1095,1099]/gtagt [1217,1221]/gtagt [1412,1416]/atagt [1820,1824]/atagt [2054,2058]/atagt [2560,2564]/atagt [2844,2848]/atagt [3870,3874]/gtagt [4222,4226]/atagt [4627,4631]/gtttagt [4686,4692]/gtag [4725,4728]/gtag [4756,4759]	ttttat [1091,1096]/ttttat [3345,3350]/ttttcat [3905,3911]/ttttcat [4664,4670]	none	tttatct [1951,1957]/attatct [2398,2404]/tttatct [2507,2513]
3HSAR000060017_CR001376761 495	none	ttttaaat [480,487]	none	none
3HSAR000044138_CR000604508 3620	atagt [48,52]/gtagt [1224,1228]/atagt [1496,1500]/atagt [1876,1880]/gtagt [2626,2630]/gttagt [2761,2766]/gtag [3050,3053]/gtag [3351,3354]	ttttat [2867,2872]/ttttcat [3585,3591]	tgtaaata [1478,1485]	tttgtct [2081,2087]
3HSAR000053589_CR000782663 185	gtagt [94,98]	ttttaat [112,118]	none	none
3HSAR000029578_CR000180834 564	gttagt [45,50]/atttagt [234,240]	ttttat [544,549]	none	none
3HSAR000001501_CR000009345 612	gtag [569,572]	ttttat [194,199]/ttttat [351,356]/ttttaaat [390,397]	none	attgtct [562,568]
3HSAR000024637_CR000150744 312	none	none	none	none
3HSAR000046731_CR000636828 945	atagt [154,158]/atagt [760,764]/gtagt [810,814]	ttttat [873,878]	none	none
3HSAR000028624_CR000175066 571	gtag [506,509]	none	none	none
3HSAR000063011_CR001397221 1604	atagt [185,189]/gtagt [590,594]/gtag [1308,1311]	ttttat [181,186]/ttttat [1157,1162]/ttttat [1216,1221]/ttttcat [1390,1396]	none	attatct [452,458]/attgtct [537,543]/tttgtct [852,858]
3HSAR000017179_CR000105111 1255	atagt [1137,1141]	ttttcat [1185,1191]	none	none
3HSAR000025898_CR000158493 202	none	none	none	none
3HSAR000022209_CR000135975 46	none	none	none	none
3HSAR000032003_CR000195650 898	none	none	none	none
3HSAR000050161_CR000733795 126	gtag [49,52]	none	none	none
3HSAR000005947_CR000036984 543	none	none	none	attgtct [157,163]
3HSAR000066223_CR001634570 7758	atagt [230,234]/atagt [340,344]/atagt [405,409]/atagt [647,651]/atagt [949,953]/atagt [1552,1556]/gtagt [2082,2086]/atagt [3356,3360]/gtagt [3490,3494]/atagt [3506,3510]/atagt [3564,3568]/gtagt [4044,4048]/gtagt [5204,5208]/atagt [5458,5462]/gtagt [5464,5468]/atagt [6622,6626]/gtagt [7045,7049]/gtagt [7533,7537]/gtagt [7550,7554]	ttttat [57,62]/ttttat [449,454]/ttttat [484,489]/ttttat [612,617]/ttttat [661,666]/ttttat [1537,1542]/ttttat [4626,4631]/ttttat [5753,5758]/ttttat [6729,6734]	none	tttatct [450,456]/attatct [1945,1951]/tttatct [5754,5760]/attgtct [6398,6404]/tttatct [6730,6736]
3HSAR000030493_CR000186510 885	atagt [770,774]	none	none	none
3HSAR000008156_CR000050106 617	attagt [342,347]/attagt [379,384]	ttttat [213,218]	none	tttatct [24,30]/attatct [282,288]
3HSAR000030433_CR000186145 79	none	ttttat [47,52]	none	none
3HSAR000036010_CR000231272 62	none	none	none	none
3HSAR000028400_CR000173708 325	gtag [144,147]	none	none	none
3HSAR000041669_CR000584553 1293	none	none	none	none
3HSAR000049647_CR000729966 2613	gtagt [74,78]/gtagt [1770,1774]/gtagt [1948,1952]/gtag [1979,1982]	none	tgtatata [1071,1078]	none
3HSAR000012601_CR000076761 744	attagt [109,114]/gtag [267,270]/gtag [341,344]/gtag [565,568]	ttttat [131,136]/ttttat [375,380]/ttttat [730,735]	none	none
3HSAR000060401_CR001379146 1440	gtagt [279,283]/atagt [922,926]/attagt [1308,1313]	ttttat [499,504]/ttttaaat [996,1003]	none	tttgtct [656,662]
3HSAR000044873_CR000618891 197	none	none	none	none
3HSAR000000151_CR000000948 126	none	none	none	none
3HSAR000060656_CR001380783 253	none	none	none	none
3HSAR000040243_CR000262215 700	gtag [267,270]	ttttaaat [661,668]	none	attgtct [514,520]/tttgtct [653,659]
3HSAR000041666_CR000584512 575	gtag [95,98]	none	none	none
3HSAR000028058_CR000171623 874	gttagt [754,759]	ttttact [315,321]	none	tttgtct [767,773]
3HSAR000013663_CR000083301 664	none	ttttat [352,357]	none	none
3HSAR000040484_CR000371492 1509	atagt [837,841]/gtagt [891,895]/gtagt [1029,1033]	ttttaaat [1089,1096]	none	attatct [823,829]
3HSAR000011447_CR000069778 183	none	none	none	none
3HSAR000037021_CR000238628 4624	atagt [197,201]/atagt [374,378]/gtagt [980,984]/gtagt [1041,1045]/atagt [1051,1055]/gtagt [1392,1396]/atagt [1835,1839]/atagt [2487,2491]/gtagt [2508,2512]/gtagt [2578,2582]/atagt [3059,3063]/gtagt [3226,3230]/gtagt [3820,3824]/gtagt [3925,3929]/atagt [4237,4241]	ttttat [874,879]/ttttat [1271,1276]/ttttat [1893,1898]/ttttat [2160,2165]/ttttat [2203,2208]/ttttat [2968,2973]/ttttat [3494,3499]/ttttat [3783,3788]/ttttat [4068,4073]/ttttat [4203,4208]/ttttat [4220,4225]	tgtacata [3892,3899]	tttgtct [1427,1433]/tttatct [4132,4138]/tttatct [4156,4162]/tttatct [4211,4217]
3HSAR000064310_CR001406472 2289	atagt [645,649]/atagt [1659,1663]	ttttat [1104,1109]/ttttat [1670,1675]/ttttat [1843,1848]/ttttaat [2143,2149]	tgtaaata [449,456]/tgtatata [1687,1694]	tttatct [1848,1854]/tttatct [1925,1931]/attgtct [2211,2217]/attgtct [2220,2226]
3HSAR000017014_CR000104084 242	atagt [102,106]	none	none	none
3HSAR000007825_CR000048365 530	gtagt [131,135]	ttttat [100,105]/ttttat [183,188]	none	none
3HSAR000050908_CR000739248 1237	gtagt [758,762]	ttttat [565,570]/ttttat [925,930]/ttttaat [959,965]	none	attatct [397,403]
3HSAR000020076_CR000122847 629	gtag [166,169]/gtag [555,558]	ttttaat [19,25]/ttttcat [255,261]	none	none
3HSAR000059109_CR001370896 153	gtag [46,49]	ttttat [82,87]/ttttat [114,119]	none	none
3HSAR000005022_CR000031321 3721	gtagt [124,128]/atagt [159,163]/atagt [593,597]/atagt [1168,1172]/atagt [1276,1280]/atagt [1308,1312]/atagt [1616,1620]/atagt [2196,2200]/atagt [2206,2210]/gtagt [3050,3054]/gtagt [3626,3630]/atagt [3676,3680]	ttttat [1675,1680]/ttttat [2016,2021]/ttttat [2179,2184]/ttttat [2298,2303]/ttttat [3153,3158]	tgtatata [1536,1543]	tttatct [1145,1151]/tttgtct [1344,1350]/tttatct [1676,1682]
[truncated: 64,984 more rows]

## Sheet: Mus Musculus
Data analysis information:
Number of 3'UTR sequences analysed	26420
Analysed PatSearch output	4
Sequence without match	4408
File name	Matched sequences
mbe	20079
cpe	15698
pbe	5444
tcs	8880
Query Sequence & Length	mbe	cpe	pbe	tcs
3MMUR000003107_CR000030037 920	atagt [564,568]/gtag [852,855]	none	none	none
3MMUR000046707_CR001640251 36	gtag [26,29]	none	none	none
3MMUR000046843_CR001640915 297	atagt [36,40]/gtag [137,140]/gtag [198,201]	none	none	tttgtct [102,108]/tttgtct [230,236]
3MMUR000002972_CR000028234 1352	atagt [137,141]/atagt [830,834]/atagt [980,984]/gtag [1119,1122]	ttttat [368,373]/ttttat [432,437]/ttttaat [655,661]/ttttcat [1015,1021]	none	tttgtct [387,393]/tttgtct [443,449]/tttgtct [724,730]/tttgtct [751,757]
3MMUR000044809_CR001346637 248	atagt [81,85]	ttttat [117,122]/ttttaat [176,182]	none	none
3MMUR000006594_CR000615687 486	gtag [115,118]/gtag [171,174]/gtag [235,238]/gtag [280,283]/gtag [304,307]	ttttaat [326,332]/ttttact [441,447]	none	none
3MMUR000012246_CR000668102 2431	gtagt [1343,1347]/gtagt [1586,1590]/gtagt [1603,1607]/gtag [1759,1762]/gtag [2057,2060]/gtag [2221,2224]	ttttat [1790,1795]	none	attatct [877,883]
3MMUR000047674_CR001645120 1389	gtagt [153,157]/atagt [604,608]/attagt [1136,1141]	ttttat [516,521]/ttttat [1242,1247]	none	none
3MMUR000001259_CR000012527 3404	gtagt [542,546]/atagt [1459,1463]/attagt [1851,1856]/attagt [2479,2484]/gtag [2786,2789]/gtag [2959,2962]/gtag [3038,3041]/gtag [3264,3267]	ttttat [461,466]/ttttat [1304,1309]/ttttat [3393,3398]	none	none
3MMUR000046734_CR001640373 1350	gtagt [676,680]/gtagt [684,688]/atagt [736,740]/gtagt [986,990]	ttttat [401,406]/ttttaat [826,832]/ttttact [1202,1208]	none	none
3MMUR000014078_CR000682891 453	gtag [99,102]	ttttaagt [239,246]	none	none
3MMUR000043979_CR001339201 1432	atagt [307,311]/gtag [340,343]/gtag [394,397]/gtag [523,526]/gtag [899,902]	ttttat [275,280]/ttttat [322,327]/ttttat [366,371]/ttttaaat [486,493]	tgtaaata [753,760]	tttatct [597,603]
3MMUR000002107_CR000019201 1606	attagt [1298,1303]/gtag [1571,1574]	ttttat [349,354]/ttttat [715,720]	none	none
3MMUR000041955_CR000996792 760	gtag [620,623]	ttttat [552,557]	none	none
3MMUR000010641_CR000653283 1682	gtag [481,484]/gtag [564,567]/gtag [670,673]/gtag [862,865]/gtag [1305,1308]	none	none	tttatct [76,82]/tttgtct [317,323]
3MMUR000020877_CR000752804 453	gtag [323,326]	none	none	none
3MMUR000044745_CR001346135 745	gtag [31,34]/gtag [337,340]	none	none	none
3MMUR000004491_CR000392984 602	atagt [388,392]/gtagt [532,536]	none	none	tttgtct [94,100]
3MMUR000044669_CR001345451 689	gttagt [395,400]/gtag [416,419]	ttttat [59,64]/ttttat [85,90]/ttttaaat [134,141]/ttttcat [305,311]	none	tttatct [242,248]/attgtct [498,504]
3MMUR000008295_CR000627646 130	none	none	none	none
3MMUR000044724_CR001345974 944	gtagt [493,497]	none	none	none
3MMUR000000563_CR000005721 170	none	none	none	none
3MMUR000008262_CR000627308 2511	gtagt [1642,1646]/gtag [1749,1752]/gtag [2299,2302]	ttttat [953,958]/ttttat [1338,1343]/ttttat [2083,2088]	none	tttgtct [178,184]/tttgtct [1987,1993]/tttgtct [2252,2258]
3MMUR000020519_CR000748852 1725	atagt [1544,1548]	ttttact [1647,1653]	none	attgtct [153,159]
3MMUR000000101_CR000002268 200	none	ttttat [160,165]	none	none
3MMUR000004690_CR000396090 1356	gtagt [357,361]/atttagt [861,867]	none	none	none
3MMUR000007034_CR000617969 1398	gtagt [411,415]/gtag [1183,1186]	ttttact [1211,1217]	none	attgtct [303,309]
3MMUR000000467_CR000004938 5587	atagt [75,79]/gtagt [1453,1457]/atagt [2760,2764]/atagt [5310,5314]/atagt [5504,5508]	ttttat [228,233]/ttttat [1262,1267]/ttttat [3148,3153]/ttttat [3742,3747]/ttttat [5500,5505]	tgtaaata [70,77]/tgtaaata [216,223]/tgtacata [1302,1309]/tgtaaata [4021,4028]	tttatct [579,585]/tttgtct [3548,3554]
3MMUR000016851_CR000708344 22	none	none	none	none
3MMUR000015749_CR000696827 1759	gtagt [310,314]/atagt [447,451]/gttagt [653,658]/attagt [675,680]/gtag [1197,1200]/gtag [1504,1507]	ttttat [443,448]/ttttat [1246,1251]/ttttaaat [1564,1571]	tgtaaata [1720,1727]	none
3MMUR000046338_CR001638424 891	gtagt [132,136]/gtagt [691,695]/gtag [746,749]/gtag [835,838]	ttttat [611,616]	none	none
3MMUR000005481_CR000402036 666	gtag [437,440]/gtag [452,455]	none	none	none
3MMUR000014399_CR000685849 2616	gtagt [708,712]/gtag [1081,1084]/gtag [1379,1382]/gtag [1409,1412]/gtag [1506,1509]/gtag [2087,2090]/gtag [2514,2517]	ttttat [1032,1037]/ttttat [1129,1134]/ttttat [1196,1201]/ttttat [2488,2493]	none	attgtct [2093,2099]
3MMUR000004789_CR000396946 89	none	none	tgtaaata [28,35]	none
3MMUR000041914_CR000996425 800	atagt [305,309]/gtag [339,342]/gtag [679,682]	ttttat [125,130]/ttttat [268,273]/ttttat [520,525]/ttttat [542,547]/ttttact [686,692]	tgtaaata [772,779]	tttgtct [319,325]
3MMUR000042936_CR001056156 531	gtag [47,50]/gtag [84,87]/gtag [323,326]/gtag [399,402]	none	none	none
3MMUR000012576_CR000671217 2852	gtagt [277,281]/gtagt [1010,1014]/atagt [1217,1221]/atagt [2667,2671]	ttttat [539,544]/ttttat [1540,1545]/ttttat [1941,1946]/ttttat [2349,2354]/ttttat [2518,2523]	tgtaaata [469,476]/tgtatata [626,633]	tttatct [1835,1841]/attatct [2634,2640]/tttgtct [2741,2747]
3MMUR000009892_CR000644864 1994	atagt [79,83]/atagt [569,573]/gtagt [757,761]/atagt [1568,1572]/gtag [1673,1676]/gtag [1702,1705]	ttttat [949,954]/ttttat [1100,1105]/ttttat [1866,1871]	none	none
3MMUR000010250_CR000648851 324	none	none	none	none
3MMUR000041735_CR000994861 3802	gtagt [296,300]/atagt [347,351]/atagt [356,360]/atagt [2199,2203]/gtag [2280,2283]/gtag [2576,2579]/gtag [2690,2693]/gtag [3155,3158]	ttttat [1791,1796]/ttttat [2488,2493]/ttttaaat [2520,2527]/ttttcat [3023,3029]	none	tttatct [1155,1161]/tttgtct [2418,2424]/tttgtct [3718,3724]
3MMUR000002040_CR000018710 1661	atagt [220,224]/gtagt [603,607]/atagt [643,647]/atagt [973,977]/atagt [1047,1051]/gtagt [1115,1119]/atagt [1202,1206]/atagt [1396,1400]	ttttat [797,802]/ttttat [1270,1275]	tgtaaata [1385,1392]	tttatct [647,653]/attatct [1264,1270]
3MMUR000020885_CR000752887 1210	gtagt [324,328]/gtagt [448,452]/gtagt [879,883]/gtag [908,911]/gtag [1072,1075]	none	none	tttgtct [666,672]
3MMUR000044156_CR001341136 469	atagt [342,346]	ttttat [153,158]	none	tttatct [154,160]
3MMUR000011699_CR000663990 668	gtagt [314,318]/gtag [508,511]/gtag [586,589]/gtag [655,658]	none	none	tttgtct [148,154]
3MMUR000010736_CR000654336 534	none	none	none	none
3MMUR000007328_CR000619454 63	none	none	none	none
3MMUR000015974_CR000698721 538	gtagt [125,129]/gtag [380,383]	ttttat [359,364]/ttttat [365,370]/ttttcat [486,492]	none	none
3MMUR000021278_CR000756810 969	atagt [607,611]	none	none	tttatct [340,346]/tttgtct [930,936]
3MMUR000011316_CR000660687 3095	atagt [426,430]/gtagt [786,790]/attagt [2400,2405]	ttttat [1318,1323]/ttttat [1978,1983]/ttttat [2099,2104]/ttttcat [2854,2860]	none	attgtct [72,78]/tttgtct [1839,1845]/tttgtct [2874,2880]
3MMUR000008245_CR000627089 636	atagt [182,186]/atagt [305,309]/gtag [554,557]	ttttat [20,25]/ttttat [320,325]/ttttat [530,535]	none	tttgtct [51,57]/tttgtct [404,410]
3MMUR000004723_CR000396367 427	none	none	none	none
3MMUR000017071_CR000711007 2922	gtagt [32,36]/atagt [813,817]/atagt [918,922]/atagt [1093,1097]/atagt [1309,1313]/atagt [2605,2609]/atagt [2637,2641]/atagt [2850,2854]	ttttat [1015,1020]/ttttat [1101,1106]/ttttat [1553,1558]/ttttat [1633,1638]/ttttat [2011,2016]/ttttat [2798,2803]	tgtacata [888,895]/tgtacata [2881,2888]	tttgtct [2017,2023]
3MMUR000014006_CR000682380 1811	gtagt [462,466]/atagt [1217,1221]/atagt [1676,1680]	ttttat [152,157]/ttttat [306,311]	none	tttgtct [653,659]/tttatct [1129,1135]
3MMUR000042655_CR001002859 1049	none	ttttaat [1030,1036]	none	none
3MMUR000008526_CR000630175 1297	atagt [600,604]/gtagt [893,897]/gtagt [906,910]/gtag [1004,1007]	ttttaat [705,711]	tgtaaata [943,950]	tttgtct [234,240]/attgtct [676,682]/attatct [957,963]
3MMUR000042691_CR001053589 1362	gtagt [13,17]/atagt [31,35]/atagt [69,73]/atagt [1230,1234]/gtag [1238,1241]/gtag [1255,1258]	ttttaat [48,54]/ttttaat [1159,1165]/ttttact [1295,1301]	tgtatata [918,925]	tttatct [1274,1280]
3MMUR000000134_CR000002502 174	gtag [117,120]	none	none	none
3MMUR000012879_CR000673868 841	gtag [152,155]	none	none	none
3MMUR000010055_CR000646536 198	gtag [111,114]	none	none	none
3MMUR000042324_CR000999911 1181	atttagt [355,361]/gtttagt [570,576]/gtag [898,901]/gtag [1156,1159]/gtag [1173,1176]	ttttaat [326,332]/ttttaat [748,754]	none	none
3MMUR000000143_CR000002567 1787	atagt [267,271]/gtagt [341,345]/atagt [447,451]/gtagt [1429,1433]/atagt [1693,1697]/atagt [1704,1708]/gtag [1754,1757]	ttttat [82,87]/ttttat [127,132]/ttttaat [1459,1465]	tgtagata [1299,1306]	tttatct [1141,1147]
3MMUR000020974_CR000753936 220	attagt [188,193]/gtag [214,217]	none	none	none
3MMUR000012090_CR000666971 1508	atagt [1158,1162]/gtag [1220,1223]	ttttat [1255,1260]	none	tttatct [1176,1182]
3MMUR000019592_CR000739027 2735	gtagt [863,867]/atagt [1495,1499]/atagt [1563,1567]/atagt [1750,1754]/gtagt [2107,2111]/attagt [2147,2152]/gtag [2470,2473]/gtag [2615,2618]	ttttat [1039,1044]/ttttat [1131,1136]/ttttat [1502,1507]/ttttat [2356,2361]/ttttat [2494,2499]	tgtaaata [961,968]/tgtacata [2235,2242]	tttgtct [969,975]/attgtct [2485,2491]/tttatct [2495,2501]
3MMUR000011534_CR000662783 1251	atagt [345,349]/attagt [557,562]/atttagt [1119,1125]	ttttat [390,395]/ttttat [653,658]/ttttat [669,674]/ttttaat [979,985]	tgtatata [363,370]	tttatct [670,676]/tttgtct [1108,1114]
3MMUR000003110_CR000030059 619	none	none	none	none
3MMUR000009466_CR000640327 375	none	none	none	none
3MMUR000045434_CR001448418 2497	gtagt [356,360]/gtagt [1134,1138]/gtag [1451,1454]/gtag [1697,1700]/gtag [1978,1981]/gtag [2062,2065]/gtag [2159,2162]/gtag [2422,2425]	ttttat [219,224]/ttttat [2010,2015]/ttttat [2318,2323]	none	tttatct [278,284]/tttgtct [2478,2484]
3MMUR000002265_CR000020414 641	atagt [398,402]/gtag [476,479]	ttttat [121,126]/ttttaat [306,312]	none	none
3MMUR000016065_CR000699506 179	none	none	none	none
3MMUR000021141_CR000755898 1904	gtagt [1378,1382]/gtag [1556,1559]/gtag [1604,1607]	ttttat [222,227]/ttttaat [237,243]	tgtacata [1437,1444]	none
3MMUR000018972_CR000732114 952	gtagt [240,244]	none	none	tttgtct [895,901]
3MMUR000020159_CR000744457 409	gtag [82,85]/gtag [213,216]/gtag [245,248]	none	none	none
3MMUR000046616_CR001639788 283	atagt [91,95]/attagt [188,193]	ttttaat [210,216]	none	tttgtct [64,70]
3MMUR000014734_CR000688574 2784	atagt [316,320]/atagt [985,989]/gtagt [1351,1355]/gtagt [1356,1360]/atagt [1859,1863]/gtttagt [1929,1935]/gtttagt [2348,2354]	ttttat [293,298]/ttttat [673,678]/ttttat [829,834]/ttttat [1718,1723]/ttttat [1906,1911]/ttttat [2552,2557]/ttttat [2558,2563]/ttttat [2594,2599]	tgtatata [639,646]	attgtct [772,778]/tttgtct [2329,2335]
3MMUR000013256_CR000676747 2199	gtagt [79,83]/gtagt [1905,1909]/atagt [2024,2028]	none	none	none
3MMUR000001709_CR000016221 130	none	none	none	tttgtct [68,74]
3MMUR000044398_CR001343202 560	gtag [246,249]	ttttaat [521,527]	none	none
3MMUR000040814_CR000987039 1568	atagt [643,647]/atagt [656,660]/attagt [737,742]	ttttat [404,409]/ttttat [429,434]/ttttat [979,984]/ttttat [1084,1089]/ttttat [1476,1481]	none	tttatct [1117,1123]/attgtct [1233,1239]
3MMUR000047059_CR001641939 440	gtagt [120,124]	ttttat [375,380]	none	none
3MMUR000009110_CR000636332 225	gtag [171,174]	none	none	none
3MMUR000042034_CR000997488 610	atagt [288,292]/atagt [432,436]	ttttat [415,420]	tgtatata [321,328]/tgtaaata [361,368]	tttatct [409,415]
3MMUR000040683_CR000986122 445	gtag [166,169]/gtag [263,266]/gtag [312,315]/gtag [366,369]	none	none	attgtct [41,47]
3MMUR000020698_CR000750876 1627	gtagt [1568,1572]	ttttat [1191,1196]/ttttaat [1259,1265]	tgtatata [1112,1119]	attgtct [1087,1093]/attatct [1126,1132]
3MMUR000046301_CR001638245 979	none	ttttat [291,296]	none	none
3MMUR000011913_CR000665657 1276	gtagt [181,185]/gtagt [386,390]/atagt [764,768]/atagt [949,953]/atagt [954,958]/attagt [1086,1091]/gtag [1219,1222]	ttttat [1195,1200]	none	attatct [680,686]/attgtct [781,787]
3MMUR000042476_CR001001201 3975	atagt [461,465]/gtagt [617,621]/atagt [637,641]/atagt [784,788]/gtagt [1153,1157]/gtagt [1160,1164]/atagt [2330,2334]/gtagt [2809,2813]/atagt [3119,3123]/gtagt [3526,3530]/gtagt [3543,3547]	ttttat [2326,2331]/ttttat [2366,2371]/ttttat [2440,2445]/ttttat [3703,3708]	none	attgtct [835,841]/tttatct [2441,2447]
3MMUR000002266_CR000020420 278	none	none	none	none
3MMUR000047561_CR001644469 447	atagt [294,298]	none	none	none
3MMUR000009052_CR000635648 254	gtag [195,198]/gtag [250,253]	none	none	none
3MMUR000014743_CR000688642 475	none	ttttcat [174,180]	none	none
3MMUR000019623_CR000739250 1917	atagt [205,209]/atagt [1338,1342]/gtag [1533,1536]	ttttat [183,188]/ttttat [201,206]/ttttat [877,882]/ttttat [1290,1295]/ttttat [1663,1668]	none	none
3MMUR000016405_CR000703024 1134	atagt [776,780]/gtagt [814,818]/gtagt [1040,1044]	ttttaat [417,423]/ttttaat [592,598]/ttttaagt [604,611]	none	none
3MMUR000042541_CR001001766 1517	atagt [248,252]/atagt [263,267]/atagt [595,599]/atagt [937,941]/gtagt [1133,1137]	ttttat [226,231]/ttttat [510,515]/ttttcat [1206,1212]	none	tttatct [511,517]
3MMUR000004659_CR000395560 536	gtag [477,480]	none	none	none
3MMUR000017408_CR000714980 2876	gtagt [428,432]/atagt [613,617]/gtagt [1741,1745]/gttagt [2742,2747]	ttttat [62,67]/ttttat [1444,1449]/ttttat [1492,1497]/ttttat [2089,2094]/ttttat [2175,2180]	none	tttgtct [1319,1325]/attgtct [2708,2714]
3MMUR000020892_CR000752943 2771	atagt [27,31]/atagt [1113,1117]/gtagt [1321,1325]/atagt [1746,1750]/atagt [2495,2499]/gtag [2543,2546]	ttttat [23,28]/ttttat [1258,1263]/ttttat [1460,1465]/ttttat [1489,1494]/ttttat [1637,1642]/ttttat [1742,1747]	none	none
3MMUR000044103_CR001340719 788	attagt [207,212]/gtag [629,632]	none	none	none
3MMUR000044391_CR001343135 285	atagt [43,47]/gtag [170,173]/gtag [239,242]	ttttat [251,256]	none	none
3MMUR000039737_CR000978483 68	gtag [26,29]	none	none	none
3MMUR000006031_CR000612171 303	none	none	none	none
3MMUR000043311_CR001210438 1126	gtag [409,412]/gtag [966,969]/gtag [995,998]	none	none	none
3MMUR000043764_CR001336769 1926	atagt [91,95]/gtagt [482,486]/atagt [1073,1077]/gtagt [1412,1416]/gtagt [1786,1790]/gtag [1890,1893]	ttttat [60,65]/ttttat [710,715]	none	tttgtct [279,285]
3MMUR000046449_CR001638985 1954	gtagt [508,512]/atagt [885,889]/gtag [1645,1648]	none	none	tttgtct [134,140]
3MMUR000041092_CR000989007 507	none	ttttcat [57,63]	none	none
3MMUR000009494_CR000640593 2193	gtagt [1452,1456]/gtag [2049,2052]/gtag [2077,2080]/gtag [2142,2145]	ttttat [829,834]/ttttat [1272,1277]	tgtatata [1545,1552]	tttatct [830,836]
3MMUR000009883_CR000644804 1221	atagt [1046,1050]	none	none	none
3MMUR000006539_CR000615439 1985	gtagt [78,82]/gtagt [1210,1214]/attagt [1734,1739]/gtag [1869,1872]	ttttat [157,162]/ttttcat [788,794]	tgtatata [207,214]	tttatct [158,164]/tttgtct [277,283]
3MMUR000001164_CR000011755 202	atagt [149,153]	none	none	tttgtct [83,89]
3MMUR000044003_CR001339441 3801	gtagt [1468,1472]/atagt [1674,1678]/gtagt [2871,2875]	ttttat [1096,1101]/ttttat [3217,3222]/ttttat [3539,3544]	tgtaaata [1669,1676]	none
3MMUR000002029_CR000018628 1578	gtagt [597,601]/gtag [911,914]/gtag [1034,1037]/gtag [1071,1074]/gtag [1325,1328]/gtag [1399,1402]	ttttat [1357,1362]/ttttat [1430,1435]/ttttact [1504,1510]	tgtaaata [1241,1248]/tgtagata [1398,1405]	none
3MMUR000016013_CR000699069 3825	gtagt [743,747]/atagt [786,790]/atagt [1259,1263]/gtagt [2138,2142]/gtagt [2326,2330]/atagt [2430,2434]/atagt [2472,2476]/gtag [3197,3200]/gtag [3488,3491]/gtag [3512,3515]/gtag [3647,3650]/gtag [3744,3747]	ttttat [393,398]/ttttat [979,984]/ttttat [1196,1201]/ttttat [2492,2497]/ttttaat [3155,3161]	tgtacata [946,953]	tttatct [980,986]
3MMUR000047523_CR001644285 205	none	none	none	none
3MMUR000003149_CR000030371 4998	atagt [277,281]/atagt [1783,1787]/gtagt [1835,1839]/atagt [2437,2441]/gtagt [2444,2448]/gtagt [3412,3416]/atagt [3486,3490]/atagt [3661,3665]/gtagt [4203,4207]/gtag [4315,4318]/gtag [4465,4468]/gtag [4603,4606]/gtag [4712,4715]	ttttat [897,902]/ttttat [975,980]/ttttat [1388,1393]/ttttat [2168,2173]/ttttat [3390,3395]/ttttat [3427,3432]/ttttaat [4884,4890]	none	tttgtct [1709,1715]/tttatct [2169,2175]
3MMUR000011563_CR000663002 3531	gtagt [1217,1221]/atagt [2915,2919]/atagt [3375,3379]	ttttat [463,468]/ttttat [552,557]/ttttat [1347,1352]/ttttat [2503,2508]/ttttaat [3352,3358]	none	tttatct [1348,1354]/tttgtct [2191,2197]
3MMUR000005330_CR000401018 1352	atagt [548,552]/atagt [555,559]/gtagt [570,574]/gtagt [904,908]/gtag [944,947]/gtag [1262,1265]/gtag [1297,1300]	ttttat [1276,1281]	none	none
3MMUR000046787_CR001640651 150	none	none	none	none
3MMUR000043285_CR001210253 131	none	ttttact [81,87]	none	none
3MMUR000017873_CR000720067 96	none	none	none	none
3MMUR000008698_CR000631962 1421	gtagt [287,291]/gtagt [542,546]/gtag [1021,1024]	ttttaat [1372,1378]	none	attatct [25,31]/tttgtct [382,388]
3MMUR000005423_CR000401646 1648	gtagt [235,239]/atagt [1181,1185]/gtagt [1495,1499]	ttttat [1044,1049]	tgtaaata [99,106]/tgtatata [698,705]	none
3MMUR000004958_CR000398303 405	gtagt [268,272]	ttttaaat [329,336]	tgtacata [353,360]	none
3MMUR000019608_CR000739133 893	atagt [261,265]/atagt [743,747]/gtag [796,799]	ttttat [294,299]/ttttaat [599,605]	none	attatct [513,519]/attatct [610,616]
3MMUR000046833_CR001640875 297	gtag [107,110]/gtag [277,280]	ttttcat [237,243]	none	none
3MMUR000002170_CR000019684 172	none	none	none	none
3MMUR000044648_CR001345273 72	gtag [32,35]	none	none	none
3MMUR000008910_CR000634067 1088	gttagt [1023,1028]/gtag [1063,1066]	none	none	attgtct [797,803]
3MMUR000007263_CR000619091 1049	gtagt [366,370]/gtagt [791,795]/gtagt [1016,1020]	none	none	none
3MMUR000001579_CR000015218 2244	gtagt [1762,1766]/gtag [1972,1975]	none	tgtatata [818,825]	attatct [2141,2147]/attatct [2155,2161]/tttgtct [2172,2178]
3MMUR000017590_CR000716895 4699	gtagt [1554,1558]/atagt [2375,2379]/atagt [3374,3378]/gtagt [3907,3911]/gtagt [4505,4509]/gtag [4560,4563]	ttttat [2602,2607]/ttttat [4594,4599]	none	tttatct [1547,1553]
3MMUR000014470_CR000686397 581	atagt [387,391]	ttttat [466,471]	none	none
3MMUR000043956_CR001338947 3700	gtagt [833,837]/atagt [997,1001]/atagt [1062,1066]/gtagt [1335,1339]/gtagt [2040,2044]/atagt [2606,2610]/atagt [3401,3405]/atagt [3426,3430]/gtagt [3438,3442]/gtag [3569,3572]/gtag [3598,3601]	ttttat [878,883]/ttttat [1003,1008]/ttttat [1077,1082]/ttttat [2024,2029]/ttttat [2377,2382]/ttttat [2448,2453]/ttttat [2970,2975]/ttttat [3232,3237]/ttttcat [3646,3652]	tgtacata [961,968]/tgtatata [2642,2649]	attgtct [464,470]
3MMUR000002952_CR000026603 593	atagt [186,190]/gtagt [197,201]	ttttat [535,540]	none	none
3MMUR000020368_CR000746972 1857	atagt [846,850]/atagt [1382,1386]	ttttact [1449,1455]/ttttact [1511,1517]	none	none
3MMUR000012570_CR000671177 736	gttagt [65,70]/gtag [684,687]	ttttact [133,139]	none	attgtct [378,384]
3MMUR000010527_CR000651870 918	none	ttttat [229,234]/ttttat [726,731]/ttttaat [857,863]	none	none
3MMUR000002099_CR000019143 703	atagt [21,25]/gtagt [364,368]/attagt [653,658]	ttttat [548,553]	none	none
3MMUR000012420_CR000669341 567	gtag [151,154]	ttttaaat [359,366]	none	none
3MMUR000014248_CR000684299 2936	atagt [1745,1749]/atagt [2314,2318]/gtagt [2623,2627]/atagt [2736,2740]	ttttat [1267,1272]/ttttat [1332,1337]/ttttaat [2766,2772]	none	tttgtct [1635,1641]
3MMUR000000251_CR000003353 560	atagt [141,145]/atagt [325,329]/gtagt [438,442]/gttagt [448,453]	none	none	none
3MMUR000006910_CR000617333 1006	atagt [660,664]	ttttat [213,218]/ttttat [333,338]/ttttat [343,348]	none	none
3MMUR000002473_CR000022005 64	none	none	none	none
3MMUR000015961_CR000698597 1158	attagt [1130,1135]	ttttat [1124,1129]	none	none
3MMUR000017288_CR000713688 330	gtag [133,136]	ttttact [239,245]	none	none
3MMUR000016197_CR000700589 3044	gtagt [1131,1135]/attagt [1832,1837]/gtag [2866,2869]	ttttaaat [2042,2049]	none	none
3MMUR000001586_CR000015279 981	gtag [443,446]/gtag [797,800]/gtag [817,820]/gtag [821,824]/gtag [965,968]	ttttat [333,338]	tgtaaata [230,237]/tgtaaata [254,261]	attatct [690,696]/attgtct [896,902]
3MMUR000040859_CR000987355 2677	gtagt [979,983]/gtagt [1347,1351]/atagt [2046,2050]/attagt [2306,2311]/gtag [2522,2525]	ttttat [469,474]/ttttat [940,945]/ttttat [946,951]/ttttat [968,973]/ttttat [1093,1098]/ttttat [1793,1798]/ttttat [1825,1830]/ttttat [2004,2009]	none	tttatct [798,804]/tttgtct [1401,1407]
3MMUR000014764_CR000688782 1692	gtagt [522,526]/atttagt [1092,1098]/gtag [1395,1398]/gtag [1580,1583]	ttttat [98,103]/ttttat [948,953]	tgtatata [627,634]	none
3MMUR000002832_CR000025595 2034	gtagt [145,149]/atagt [551,555]/atagt [1323,1327]/atagt [1330,1334]/atagt [1345,1349]/gtagt [1712,1716]/gtagt [1827,1831]	ttttat [385,390]/ttttat [1341,1346]/ttttat [1377,1382]	tgtaaata [323,330]/tgtagata [1242,1249]/tgtaaata [1462,1469]	tttatct [782,788]
3MMUR000004555_CR000393972 1303	gtagt [616,620]/gtagt [939,943]	ttttact [1192,1198]	none	none
3MMUR000020318_CR000746408 44	none	ttttat [32,37]	none	none
3MMUR000045650_CR001450102 352	gtag [292,295]	none	none	none
3MMUR000010071_CR000646736 3167	gtagt [310,314]/atagt [1128,1132]/atagt [1286,1290]/atagt [1422,1426]/atagt [1758,1762]/gtagt [1798,1802]/atagt [1865,1869]/atagt [1992,1996]/atagt [2040,2044]/atagt [2920,2924]/gtag [3122,3125]	ttttat [1231,1236]/ttttat [2016,2021]/ttttat [2036,2041]/ttttat [2985,2990]/ttttat [3017,3022]	none	attgtct [783,789]/tttatct [1058,1064]/tttgtct [1714,1720]/attgtct [2528,2534]/tttgtct [2839,2845]
3MMUR000014087_CR000682958 140	gtag [27,30]	none	none	none
3MMUR000015076_CR000691157 4997	gtagt [378,382]/gtagt [1013,1017]/atagt [3013,3017]/gtag [3189,3192]/gtag [3797,3800]	ttttat [2141,2146]/ttttat [2151,2156]/ttttat [2467,2472]/ttttat [4618,4623]/ttttat [4750,4755]/ttttaat [4782,4788]	tgtatata [3008,3015]	tttgtct [683,689]/tttgtct [1310,1316]/tttgtct [4673,4679]
3MMUR000002915_CR000026243 1694	gtag [782,785]/gtag [1131,1134]	ttttat [322,327]/ttttat [1270,1275]/ttttat [1276,1281]	none	tttgtct [868,874]
3MMUR000001316_CR000013006 691	gtag [505,508]	ttttat [230,235]	none	none
3MMUR000013287_CR000676967 125	none	none	none	none
3MMUR000039672_CR000977985 1937	atagt [962,966]/atagt [1112,1116]/atagt [1373,1377]/atagt [1390,1394]/gtag [1508,1511]/gtag [1768,1771]/gtag [1861,1864]	ttttat [1490,1495]/ttttat [1552,1557]	tgtacata [232,239]	tttatct [566,572]
3MMUR000011350_CR000660972 80	none	none	none	none
3MMUR000040921_CR000987834 4338	atagt [1249,1253]/gtagt [1717,1721]/atagt [1749,1753]/atagt [2190,2194]/atagt [2210,2214]/gtagt [2374,2378]/atagt [3344,3348]/gtagt [3386,3390]/atagt [3477,3481]/gtag [3525,3528]/gtag [3652,3655]/gtag [3753,3756]	ttttat [2568,2573]/ttttat [4022,4027]/ttttat [4256,4261]	none	tttgtct [2551,2557]/attatct [3856,3862]
3MMUR000041891_CR000996182 1879	atagt [419,423]/gtagt [1485,1489]/gtagt [1490,1494]/gtagt [1609,1613]	ttttaagt [1562,1569]	none	none
3MMUR000043236_CR001209858 360	atagt [192,196]/atagt [305,309]	ttttat [310,315]/ttttcat [329,335]	tgtaaata [300,307]	none
3MMUR000041098_CR000989046 852	gtag [114,117]	none	none	none
3MMUR000017542_CR000716292 369	none	none	none	none
3MMUR000040740_CR000986536 1166	gtag [350,353]/gtag [467,470]/gtag [528,531]/gtag [705,708]/gtag [848,851]	ttttat [225,230]/ttttat [836,841]	none	none
3MMUR000021177_CR000756169 72	none	none	none	none
3MMUR000016981_CR000709819 2526	gtagt [173,177]/gttagt [2136,2141]/gtag [2394,2397]	ttttat [1693,1698]/ttttaagt [2483,2490]	none	none
3MMUR000020900_CR000753009 2372	gtagt [316,320]/gtagt [1456,1460]/gtagt [1466,1470]/atagt [2319,2323]/atagt [2326,2330]	ttttat [67,72]/ttttat [552,557]/ttttat [2342,2347]	none	tttgtct [1575,1581]/tttatct [1895,1901]/tttgtct [2171,2177]
3MMUR000044453_CR001343682 913	none	ttttaat [565,571]	none	none
3MMUR000002667_CR000023581 1713	gtagt [363,367]/atagt [592,596]/atagt [833,837]/atagt [1418,1422]/atttagt [1642,1648]	ttttat [353,358]/ttttat [1283,1288]/ttttaagt [1469,1476]	tgtaaata [1202,1209]	attatct [314,320]/tttatct [354,360]
3MMUR000000802_CR000007398 1691	gtagt [1240,1244]/gtag [1248,1251]	ttttaaat [1080,1087]	tgtacata [1059,1066]	none
3MMUR000045262_CR001447016 827	gttagt [672,677]/gtag [688,691]	ttttat [228,233]	none	none
3MMUR000040924_CR000987853 1091	gtagt [681,685]/gtagt [734,738]/gtag [797,800]	none	none	none
3MMUR000018162_CR000723296 417	gtagt [288,292]/attagt [310,315]/gtag [394,397]	none	none	none
3MMUR000011537_CR000662804 669	gtttagt [47,53]/gtag [135,138]/gtag [225,228]/gtag [577,580]	ttttat [233,238]/ttttat [404,409]	tgtatata [364,371]	attgtct [21,27]
3MMUR000012677_CR000672251 1922	gtagt [94,98]/atagt [163,167]/gtagt [317,321]/atagt [510,514]/atagt [1027,1031]/atagt [1231,1235]/gtagt [1338,1342]/gtagt [1353,1357]/atagt [1809,1813]	ttttat [101,106]/ttttaat [1676,1682]	tgtacata [1788,1795]/tgtaaata [1799,1806]	tttatct [1875,1881]
3MMUR000040897_CR000987646 2805	gtagt [786,790]/gtagt [2062,2066]/atagt [2199,2203]/atagt [2612,2616]	ttttat [185,190]/ttttat [1518,1523]/ttttat [1587,1592]/ttttat [1593,1598]/ttttat [1901,1906]/ttttact [2013,2019]	tgtatata [210,217]	attgtct [189,195]
3MMUR000041812_CR000995634 591	gtag [327,330]/gtag [381,384]	ttttat [561,566]	none	none
3MMUR000044114_CR001340830 5128	gtagt [448,452]/atagt [1550,1554]/gtagt [2117,2121]/atagt [2256,2260]/gtagt [2292,2296]/atagt [2399,2403]/atagt [3202,3206]/gtagt [3601,3605]/attagt [4682,4687]	ttttat [309,314]/ttttat [951,956]/ttttat [1342,1347]/ttttat [1422,1427]/ttttat [1517,1522]/ttttat [1791,1796]/ttttat [2490,2495]/ttttat [3848,3853]/ttttat [4938,4943]/ttttat [5016,5021]	tgtatata [3835,3842]	tttatct [1212,1218]/tttgtct [1620,1626]/tttatct [1792,1798]/attgtct [2653,2659]/attatct [2819,2825]/tttatct [3182,3188]/tttatct [5017,5023]
3MMUR000012328_CR000668702 2140	atagt [1818,1822]/gtag [1914,1917]	none	none	none
3MMUR000016396_CR000702920 178	gtag [15,18]	none	none	none
3MMUR000044545_CR001344403 419	gtag [119,122]	ttttat [407,412]	none	none
3MMUR000002242_CR000020245 100	none	none	none	none
3MMUR000008201_CR000626430 110	none	none	none	none
3MMUR000016323_CR000702075 14	none	none	none	none
3MMUR000041729_CR000994813 747	atagt [456,460]/gtag [481,484]	ttttat [560,565]	none	none
3MMUR000008539_CR000630343 3310	gtagt [722,726]/atagt [897,901]/atagt [1087,1091]/gtagt [1854,1858]/gtagt [1908,1912]/atagt [3238,3242]	ttttat [470,475]/ttttat [1338,1343]/ttttat [1433,1438]/ttttaat [1790,1796]	none	attgtct [111,117]/attgtct [270,276]/attgtct [442,448]/tttgtct [599,605]
3MMUR000009893_CR000644871 2006	atagt [1064,1068]/atagt [1497,1501]/gtag [1527,1530]	ttttat [411,416]/ttttat [1308,1313]	tgtagata [1297,1304]	none
3MMUR000007226_CR000618906 1441	gtagt [1098,1102]/gtagt [1152,1156]/gtag [1157,1160]	ttttat [515,520]	none	none
3MMUR000046721_CR001640317 462	gtag [309,312]	none	none	none
3MMUR000042740_CR001053937 1578	attagt [27,32]/gttagt [359,364]/attagt [1180,1185]	ttttat [1491,1496]	none	attatct [35,41]
3MMUR000004320_CR000334327 165	gtagt [39,43]/atagt [103,107]/gtagt [155,159]	ttttat [131,136]	none	none
3MMUR000008925_CR000634247 1423	gtagt [557,561]	none	tgtacata [781,788]	tttgtct [467,473]
3MMUR000006063_CR000612358 3425	gtagt [1088,1092]/gtagt [2389,2393]/gtagt [2456,2460]/atagt [3156,3160]/atagt [3396,3400]	ttttat [589,594]/ttttcat [1436,1442]	none	none
3MMUR000047135_CR001642326 884	atagt [696,700]	none	none	none
3MMUR000047423_CR001643815 601	atagt [28,32]	ttttat [400,405]/ttttat [545,550]	none	none
3MMUR000005370_CR000401312 663	gtagt [177,181]	ttttat [354,359]/ttttaat [527,533]/ttttaagt [553,560]	none	none
3MMUR000045626_CR001449911 504	gtagt [308,312]/attagt [326,331]	ttttcat [296,302]	none	none
3MMUR000014681_CR000688192 2240	gtagt [739,743]/gtagt [1124,1128]/gtagt [1690,1694]/gtagt [1882,1886]/gtagt [1969,1973]/gtag [2193,2196]	ttttat [672,677]/ttttat [1584,1589]/ttttat [1853,1858]	tgtatata [1292,1299]	none
3MMUR000011670_CR000663778 4863	gtagt [662,666]/atagt [961,965]/atagt [1088,1092]/atagt [1337,1341]/gtagt [1558,1562]/gtagt [2378,2382]/atagt [2864,2868]/gtagt [3054,3058]/gtagt [3327,3331]/atagt [3414,3418]/atagt [3741,3745]/gtagt [4092,4096]/gtagt [4641,4645]/gtag [4657,4660]	ttttat [1309,1314]/ttttat [1984,1989]/ttttat [3079,3084]/ttttat [4784,4789]/ttttat [4792,4797]/ttttat [4802,4807]/ttttat [4812,4817]	none	attatct [1318,1324]/tttgtct [1932,1938]/tttgtct [2400,2406]
3MMUR000004902_CR000397855 3895	atagt [515,519]/gtagt [836,840]/atagt [891,895]/gtagt [2473,2477]/atagt [2680,2684]/gttagt [2813,2818]/attagt [3622,3627]	ttttat [330,335]/ttttat [342,347]/ttttat [954,959]/ttttat [2283,2288]/ttttat [3151,3156]/ttttat [3757,3762]	tgtaaata [89,96]/tgtagata [510,517]/tgtacata [726,733]	attgtct [2875,2881]/tttgtct [3434,3440]
3MMUR000039661_CR000977887 1063	gtagt [799,803]	none	tgtaaata [842,849]	tttatct [954,960]
3MMUR000019021_CR000732716 925	gttagt [513,518]	ttttaat [246,252]/ttttaat [411,417]	tgtaaata [794,801]	none
3MMUR000008228_CR000626812 319	gtag [110,113]/gtag [210,213]	none	none	none
3MMUR000016978_CR000709798 624	none	ttttaaat [445,452]	none	none
3MMUR000010171_CR000647920 4175	atagt [54,58]/atagt [1498,1502]/gtagt [1647,1651]/gtagt [1886,1890]/atagt [1914,1918]/atagt [2325,2329]/gtagt [3930,3934]	ttttaat [2709,2715]	none	tttatct [1996,2002]
3MMUR000003022_CR000029377 53	none	none	none	none
3MMUR000019571_CR000738810 159	none	none	none	none
3MMUR000013900_CR000681560 252	attagt [142,147]/gtag [170,173]	ttttaat [33,39]	none	none
3MMUR000008458_CR000629463 489	atagt [52,56]/attagt [322,327]	none	none	attgtct [193,199]
3MMUR000017927_CR000720557 154	none	none	none	none
3MMUR000011672_CR000663796 519	gtagt [459,463]	ttttaat [355,361]	none	none
3MMUR000011769_CR000664539 138	none	none	none	none
3MMUR000045089_CR001445633 257	none	ttttaat [224,230]	none	none
3MMUR000044280_CR001342184 3175	gtagt [123,127]/gtagt [614,618]/gtagt [1191,1195]/atagt [1662,1666]/gtagt [1974,1978]/atagt [2512,2516]/gtagt [2588,2592]/atagt [2627,2631]/gtag [2984,2987]	ttttat [945,950]/ttttat [988,993]/ttttat [2944,2949]/ttttat [3060,3065]	tgtatata [602,609]/tgtaaata [3116,3123]	tttgtct [2282,2288]
3MMUR000020093_CR000743774 957	gtagt [17,21]/atagt [699,703]/gtagt [846,850]	ttttat [229,234]/ttttat [723,728]/ttttat [796,801]/ttttaat [833,839]	tgtatata [682,689]	tttatct [481,487]
3MMUR000014696_CR000688297 196	gtag [147,150]	none	none	none
3MMUR000011757_CR000664443 2598	gtag [736,739]/gtag [826,829]/gtag [1024,1027]/gtag [1775,1778]/gtag [2006,2009]/gtag [2492,2495]	ttttat [1960,1965]/ttttat [2400,2405]	none	tttgtct [2092,2098]
3MMUR000000780_CR000007240 1638	atagt [1291,1295]/gtagt [1432,1436]/attagt [1462,1467]	ttttat [729,734]	none	tttgtct [692,698]
3MMUR000008904_CR000634012 752	gtag [701,704]	ttttat [738,743]	none	none
3MMUR000004866_CR000397549 1500	atagt [271,275]/gtagt [838,842]/gtag [982,985]/gtag [1026,1029]/gtag [1081,1084]	ttttact [53,59]	tgtaaata [931,938]	none
3MMUR000042893_CR001055860 301	none	ttttat [248,253]/ttttaat [286,292]	none	none
3MMUR000008370_CR000628449 265	gtag [102,105]/gtag [150,153]	none	none	none
3MMUR000015280_CR000692889 1076	gtag [505,508]/gtag [950,953]	ttttat [1010,1015]	none	none
3MMUR000005285_CR000400700 319	none	none	none	none
3MMUR000019058_CR000733072 532	gtag [270,273]/gtag [314,317]	ttttaat [139,145]	none	tttgtct [192,198]
3MMUR000001181_CR000011892 473	gttagt [220,225]	ttttat [190,195]	none	none
3MMUR000004453_CR000392311 146	none	ttttat [101,106]/ttttaaat [114,121]	none	none
3MMUR000012990_CR000674857 621	gtag [236,239]/gtag [443,446]	ttttat [120,125]/ttttaaat [600,607]	none	tttatct [180,186]
3MMUR000012709_CR000672524 61	none	none	none	none
3MMUR000040984_CR000988264 1267	gtagt [59,63]/gtagt [986,990]/gtagt [994,998]/gtag [1055,1058]	ttttat [526,531]/ttttaat [964,970]/ttttcat [1207,1213]	tgtaaata [701,708]	none
3MMUR000007397_CR000619797 92	none	none	none	none
3MMUR000015387_CR000693776 1216	atagt [599,603]/atagt [937,941]	ttttat [898,903]	none	tttgtct [486,492]/tttatct [1061,1067]
3MMUR000020588_CR000749559 2529	atagt [636,640]/gttagt [745,750]/gttagt [1939,1944]/gtag [2226,2229]	ttttat [1598,1603]/ttttat [1811,1816]/ttttat [2200,2205]/ttttat [2460,2465]	tgtacata [2179,2186]	tttgtct [1109,1115]/tttatct [2461,2467]
3MMUR000002486_CR000022133 51	none	none	none	none
3MMUR000018175_CR000723522 1679	gtag [296,299]/gtag [699,702]/gtag [953,956]/gtag [1131,1134]/gtag [1162,1165]/gtag [1303,1306]	ttttat [1615,1620]	none	tttgtct [1316,1322]
3MMUR000015990_CR000698885 685	gtagt [540,544]	none	none	none
3MMUR000008937_CR000634368 1061	gtag [592,595]	ttttaat [1007,1013]	none	tttgtct [204,210]/tttgtct [245,251]
3MMUR000011185_CR000658708 548	atagt [318,322]/attagt [447,452]	ttttat [31,36]/ttttat [294,299]/ttttat [457,462]	none	tttatct [501,507]
3MMUR000014528_CR000686859 2492	atagt [288,292]/atagt [450,454]/gtagt [528,532]/atagt [1497,1501]/atagt [1874,1878]/gtagt [2231,2235]/atagt [2275,2279]/gtag [2294,2297]	ttttat [142,147]/ttttat [446,451]/ttttat [1403,1408]/ttttat [1992,1997]/ttttat [2442,2447]	none	tttatct [143,149]/tttatct [1404,1410]
3MMUR000014870_CR000689556 2573	gttagt [2291,2296]	none	none	none
3MMUR000041067_CR000988839 4683	atagt [165,169]/atagt [212,216]/gtagt [645,649]/gtagt [1107,1111]/atagt [1502,1506]/atagt [2439,2443]/gtagt [3699,3703]/gtag [4138,4141]/gtag [4178,4181]/gtag [4550,4553]	ttttat [2699,2704]/ttttat [4605,4610]/ttttact [4632,4638]	tgtagata [4549,4556]/tgtacata [4565,4572]	tttgtct [2643,2649]/attatct [2781,2787]/tttgtct [3423,3429]
3MMUR000046516_CR001639308 591	none	none	none	none
3MMUR000003021_CR000029370 23	none	none	none	none
3MMUR000001731_CR000016386 388	gtag [55,58]	none	none	none
3MMUR000002174_CR000019719 361	atagt [125,129]/atagt [320,324]	ttttact [133,139]	none	none
3MMUR000040720_CR000986386 312	gtagt [19,23]/gttagt [174,179]	none	none	none
3MMUR000017002_CR000710095 1057	atagt [804,808]/atagt [1026,1030]	ttttat [74,79]/ttttaat [590,596]	none	tttatct [217,223]
3MMUR000046463_CR001639047 84	none	ttttat [5,10]	none	none
3MMUR000039589_CR000977270 1048	gtag [372,375]	ttttat [317,322]/ttttat [325,330]/ttttat [332,337]/ttttat [535,540]/ttttaat [1021,1027]	none	none
3MMUR000008616_CR000631089 532	none	none	none	none
3MMUR000042673_CR001003002 389	atagt [109,113]/atagt [282,286]	ttttat [31,36]	none	tttatct [32,38]
3MMUR000006472_CR000615096 3433	atagt [33,37]/gtagt [1087,1091]/atagt [1826,1830]/gtagt [1851,1855]/atttagt [2085,2091]/gtag [2702,2705]/gtag [3316,3319]	ttttat [43,48]/ttttat [79,84]/ttttat [895,900]/ttttat [991,996]/ttttat [2881,2886]/ttttact [3262,3268]	tgtatata [1119,1126]	tttatct [44,50]
3MMUR000042577_CR001002053 644	atagt [476,480]	ttttat [356,361]	tgtacata [502,509]	none
3MMUR000019338_CR000736137 564	gtag [435,438]	ttttaat [539,545]	none	none
3MMUR000001338_CR000013177 1539	atagt [181,185]/atagt [387,391]/atagt [528,532]/gtagt [1186,1190]/atagt [1246,1250]/atagt [1291,1295]/atagt [1468,1472]/gtag [1536,1539]	ttttat [24,29]/ttttat [777,782]/ttttat [1127,1132]/ttttaagt [1251,1258]	tgtaaata [837,844]	none
3MMUR000043106_CR001208785 1131	gtag [159,162]/gtag [182,185]/gtag [1018,1021]	none	none	none
3MMUR000002861_CR000025812 3189	gtagt [834,838]/atagt [2730,2734]/gtagt [3080,3084]	ttttat [754,759]/ttttat [1573,1578]/ttttat [3095,3100]	none	none
3MMUR000001940_CR000017954 532	gtagt [451,455]	ttttaat [248,254]	none	none
3MMUR000009802_CR000643867 307	none	none	none	none
3MMUR000045237_CR001446820 602	gtagt [411,415]/gtagt [468,472]	ttttat [181,186]/ttttat [282,287]	none	tttatct [283,289]
3MMUR000047174_CR001642528 1372	atagt [539,543]/gtag [1035,1038]/gtag [1196,1199]/gtag [1224,1227]	ttttaat [73,79]	none	none
3MMUR000046347_CR001638469 251	gtag [205,208]	ttttcat [16,22]	none	none
3MMUR000041498_CR000992831 2487	atagt [507,511]/atagt [599,603]/atagt [632,636]/gtag [797,800]/gtag [851,854]/gtag [1414,1417]/gtag [1482,1485]/gtag [1486,1489]/gtag [1547,1550]/gtag [1571,1574]/gtag [1588,1591]/gtag [2008,2011]/gtag [2138,2141]	ttttat [2390,2395]	none	attatct [565,571]/tttgtct [577,583]
3MMUR000020665_CR000750475 5280	gtagt [280,284]/atagt [1440,1444]/atagt [1687,1691]/gtagt [2153,2157]/atagt [2506,2510]/atagt [3565,3569]/atagt [3602,3606]/atagt [3811,3815]/atagt [3848,3852]/atagt [4273,4277]/gtagt [4410,4414]/atagt [4436,4440]/gtagt [4622,4626]/gtagt [4744,4748]/atagt [4847,4851]/attagt [5092,5097]	ttttat [909,914]/ttttat [1118,1123]/ttttat [1516,1521]/ttttat [1627,1632]/ttttat [1964,1969]/ttttat [2346,2351]/ttttat [2470,2475]/ttttat [3732,3737]/ttttat [4087,4092]/ttttat [4443,4448]/ttttat [5197,5202]/ttttat [5216,5221]	tgtaaata [3894,3901]	tttatct [1119,1125]/tttgtct [2243,2249]/tttatct [2347,2353]/attatct [2944,2950]
3MMUR000017029_CR000710389 444	gtag [60,63]/gtag [273,276]	ttttat [399,404]	none	tttgtct [320,326]
3MMUR000042672_CR001002995 389	atagt [109,113]/atagt [282,286]	ttttat [31,36]	none	tttatct [32,38]
3MMUR000016247_CR000701122 965	gtagt [872,876]	ttttcat [285,291]	none	none
3MMUR000008361_CR000628376 1908	gtagt [826,830]/gttagt [994,999]	ttttat [1011,1016]/ttttat [1729,1734]	none	tttgtct [898,904]
3MMUR000000302_CR000003778 881	gtagt [527,531]	ttttaaat [616,623]	none	none
3MMUR000007627_CR000620849 962	gtagt [289,293]/gtag [525,528]	none	none	none
3MMUR000019162_CR000734241 285	gtagt [194,198]	ttttact [239,245]	none	none
3MMUR000017181_CR000712376 933	none	ttttat [744,749]/ttttat [905,910]	none	none
3MMUR000000052_CR000001903 780	atagt [160,164]/atagt [643,647]/attagt [710,715]/gtag [728,731]	ttttat [422,427]/ttttat [691,696]	tgtaaata [744,751]	none
3MMUR000002773_CR000024507 2253	atagt [364,368]/atagt [814,818]/atagt [2071,2075]/gttagt [2201,2206]	ttttat [1079,1084]/ttttat [1161,1166]/ttttcat [1822,1828]	none	attatct [1674,1680]/attatct [1774,1780]/attgtct [2021,2027]
3MMUR000041701_CR000994578 866	gtagt [212,216]/atttagt [721,727]	ttttat [317,322]/ttttat [343,348]/ttttat [810,815]	none	none
3MMUR000043669_CR001335645 2319	gtagt [927,931]/gtagt [1364,1368]/atagt [1891,1895]/gtag [1897,1900]	ttttat [840,845]/ttttat [2190,2195]	tgtatata [2102,2109]	tttatct [856,862]/tttatct [901,907]/tttgtct [1987,1993]
3MMUR000019637_CR000739385 850	gtag [208,211]/gtag [417,420]	ttttat [67,72]/ttttat [360,365]/ttttaagt [711,718]	tgtatata [72,79]	attgtct [97,103]
3MMUR000014288_CR000684797 128	none	none	none	none
3MMUR000007617_CR000620820 534	gtagt [21,25]/gtag [317,320]/gtag [328,331]	ttttat [259,264]	tgtatata [481,488]	none
3MMUR000004364_CR000334862 1292	gttagt [661,666]	ttttat [575,580]/ttttat [990,995]	none	none
3MMUR000011782_CR000664639 79	none	none	tgtaaata [48,55]	none
3MMUR000040789_CR000986875 83	none	none	none	none
3MMUR000043597_CR001334816 1361	gtagt [1012,1016]/gtag [1173,1176]/gtag [1222,1225]	ttttat [479,484]/ttttat [770,775]/ttttat [1295,1300]	none	attgtct [650,656]
3MMUR000000508_CR000005230 1137	atagt [392,396]/gtag [472,475]	ttttat [593,598]/ttttat [837,842]	none	tttgtct [812,818]
3MMUR000008969_CR000634758 216	gtagt [1,5]	none	none	none
3MMUR000012793_CR000673233 290	none	none	none	none
3MMUR000045586_CR001449625 4933	atagt [501,505]/gtagt [692,696]/atagt [698,702]/gtagt [1806,1810]/gtagt [2100,2104]/gtagt [2393,2397]/gtagt [2398,2402]/gtagt [2674,2678]/gtagt [3273,3277]/atagt [3933,3937]/atagt [3968,3972]/gtagt [4261,4265]/attagt [4498,4503]	ttttat [433,438]/ttttat [596,601]/ttttat [819,824]/ttttat [1104,1109]/ttttat [1490,1495]/ttttat [1609,1614]/ttttat [2703,2708]/ttttat [2728,2733]/ttttat [4626,4631]/ttttat [4922,4927]	tgtaaata [344,351]/tgtatata [2490,2497]	attatct [4644,4650]
3MMUR000014144_CR000683428 1067	atagt [744,748]/gtag [787,790]	none	tgtacata [318,325]	attatct [552,558]
3MMUR000040450_CR000984392 99	none	none	tgtacata [16,23]	tttgtct [74,80]
3MMUR000044195_CR001341421 84	none	none	none	none
3MMUR000000506_CR000005217 280	gtag [169,172]/gtag [203,206]/gtag [213,216]/gtag [223,226]/gtag [232,235]	none	tgtagata [202,209]/tgtagata [212,219]/tgtagata [222,229]/tgtagata [231,238]	none
3MMUR000020570_CR000749380 164	gtag [80,83]	none	none	none
3MMUR000012607_CR000671458 2923	atagt [1495,1499]/atagt [1678,1682]/atagt [1696,1700]/gtagt [2219,2223]/gtag [2854,2857]	ttttat [313,318]/ttttat [1471,1476]/ttttat [1647,1652]/ttttat [1928,1933]/ttttat [2353,2358]/ttttat [2885,2890]	none	tttatct [1472,1478]
3MMUR000004756_CR000396621 408	atagt [198,202]/gtag [328,331]	ttttat [220,225]	none	tttatct [221,227]/tttgtct [347,353]
3MMUR000017685_CR000717919 80	gtag [54,57]	none	none	none
3MMUR000012192_CR000667720 1268	atagt [115,119]/gtagt [518,522]/atagt [1101,1105]/atagt [1149,1153]	ttttat [571,576]/ttttat [1015,1020]/ttttat [1061,1066]	none	tttgtct [485,491]
3MMUR000006932_CR000617449 1004	none	ttttat [629,634]/ttttaat [638,644]	none	tttgtct [215,221]
3MMUR000000661_CR000006388 536	gtag [266,269]	ttttat [242,247]/ttttat [297,302]/ttttcat [522,528]	none	none
3MMUR000011121_CR000658188 1571	gtagt [85,89]/atagt [595,599]/atagt [896,900]/atagt [968,972]/atagt [1261,1265]/atagt [1402,1406]/atagt [1487,1491]	ttttat [667,672]/ttttat [798,803]/ttttat [907,912]/ttttat [1501,1506]/ttttact [1564,1570]	tgtaaata [1256,1263]/tgtaaata [1418,1425]	attatct [616,622]/tttgtct [742,748]
3MMUR000010951_CR000656592 744	gtag [46,49]	none	tgtatata [413,420]	none
3MMUR000017900_CR000720327 94	none	none	none	none
3MMUR000045015_CR001445056 306	none	none	none	none
3MMUR000013314_CR000677145 455	none	none	none	tttatct [253,259]
3MMUR000045289_CR001447255 770	atagt [665,669]/gtagt [714,718]	ttttact [100,106]	tgtatata [660,667]	none
3MMUR000008988_CR000634974 274	gttagt [175,180]	none	none	attatct [206,212]
3MMUR000011435_CR000662059 490	gttagt [189,194]/gttagt [205,210]/gtag [339,342]	ttttat [97,102]/ttttat [461,466]	none	none
3MMUR000004390_CR000335490 92	gtag [16,19]	none	none	none
3MMUR000001358_CR000013345 197	none	ttttat [97,102]	none	none
3MMUR000016597_CR000705169 2433	gtag [38,41]/gtag [822,825]/gtag [1255,1258]/gtag [1847,1850]/gtag [2166,2169]	ttttat [1731,1736]	none	none
3MMUR000018002_CR000721475 421	gtag [123,126]	none	none	none
3MMUR000014294_CR000684944 16	none	none	none	none
3MMUR000013937_CR000681840 1020	atagt [155,159]/atagt [373,377]/atagt [410,414]/gtagt [977,981]	ttttat [123,128]/ttttcat [134,140]	none	tttgtct [962,968]
3MMUR000011734_CR000664262 714	gtag [225,228]	ttttaat [675,681]	none	none
3MMUR000004588_CR000394453 208	gtag [15,18]	none	none	none
3MMUR000043266_CR001210089 1031	gtag [142,145]/gtag [842,845]	ttttat [1017,1022]	none	none
3MMUR000015499_CR000694790 321	gtag [14,17]	none	none	tttgtct [294,300]
3MMUR000006071_CR000612427 564	atagt [292,296]/gtag [335,338]/gtag [413,416]/gtag [504,507]	none	none	none
3MMUR000015784_CR000697119 455	gtag [451,454]	ttttat [332,337]	none	none
3MMUR000040360_CR000983679 867	gttagt [323,328]	ttttat [362,367]/ttttat [369,374]/ttttat [386,391]/ttttat [493,498]/ttttat [579,584]/ttttat [802,807]	none	attgtct [840,846]
3MMUR000017875_CR000720103 215	attagt [44,49]/gttagt [64,69]	ttttact [146,152]	none	none
3MMUR000041089_CR000988989 604	gtag [390,393]	ttttat [8,13]/ttttat [219,224]	none	tttatct [266,272]/tttgtct [423,429]
3MMUR000041633_CR000994027 337	gtag [149,152]	none	none	none
3MMUR000012851_CR000673656 442	gtag [184,187]	none	none	none
3MMUR000044220_CR001341611 350	none	none	none	none
3MMUR000046872_CR001641041 488	none	none	none	none
3MMUR000019429_CR000737167 58	none	none	none	none
3MMUR000015065_CR000691056 1679	atagt [171,175]/gtagt [271,275]/atagt [1059,1063]/gtagt [1202,1206]/atagt [1663,1667]	ttttaat [699,705]/ttttaaat [1467,1474]	none	attgtct [1589,1595]
3MMUR000020681_CR000750646 1672	atagt [302,306]/gtagt [1353,1357]/gtag [1456,1459]	ttttat [1310,1315]	tgtagata [865,872]	none
3MMUR000009410_CR000639801 1143	gtagt [308,312]/gtagt [962,966]	ttttat [1126,1131]/ttttat [1135,1140]	none	tttgtct [430,436]
3MMUR000042731_CR001053879 1197	atttagt [624,630]	ttttaagt [737,744]	none	tttgtct [772,778]
3MMUR000007579_CR000620635 478	gtag [99,102]	ttttat [183,188]/ttttaat [281,287]	none	tttatct [317,323]
3MMUR000012753_CR000672902 187	atagt [124,128]	none	none	none
3MMUR000044514_CR001344173 1589	gtagt [848,852]/gtttagt [1477,1483]/gtag [1580,1583]	ttttat [675,680]/ttttcat [1365,1371]	none	none
3MMUR000001125_CR000011415 626	gtag [408,411]	ttttaat [467,473]	none	none
3MMUR000047527_CR001644302 439	gtagt [120,124]	ttttat [375,380]	none	none
3MMUR000003211_CR000050910 472	gtag [279,282]	ttttat [399,404]	none	none
3MMUR000010376_CR000650142 4781	atagt [57,61]/atagt [333,337]/gtagt [1162,1166]/atagt [1252,1256]/atagt [1663,1667]/gtagt [2110,2114]/gtagt [2910,2914]/atagt [3429,3433]/gtagt [4453,4457]	ttttat [47,52]/ttttat [217,222]/ttttat [1186,1191]/ttttat [1465,1470]/ttttat [1825,1830]/ttttat [1988,1993]/ttttat [2799,2804]/ttttat [3011,3016]/ttttat [3894,3899]/ttttat [4222,4227]/ttttat [4271,4276]/ttttat [4367,4372]/ttttaat [4603,4609]/ttttaat [4765,4771]	tgtatata [29,36]/tgtatata [3308,3315]/tgtacata [4424,4431]/tgtaaata [4457,4464]	tttgtct [1561,1567]/attatct [2193,2199]/tttatct [2800,2806]/tttatct [4199,4205]
3MMUR000015210_CR000692308 196	atagt [102,106]	none	none	none
3MMUR000008874_CR000633709 950	gtagt [276,280]/attagt [328,333]/gtag [741,744]	ttttat [339,344]/ttttaagt [810,817]	none	attatct [803,809]
3MMUR000042734_CR001053897 259	gtag [167,170]	none	none	none
3MMUR000019279_CR000735467 413	gtagt [319,323]	ttttat [151,156]	none	tttatct [214,220]
3MMUR000019334_CR000736107 175	none	none	none	none
3MMUR000042007_CR000997205 185	none	none	none	none
3MMUR000012531_CR000670859 1221	gtagt [327,331]/gtagt [376,380]/atagt [478,482]/atagt [731,735]/gtag [838,841]/gtag [1043,1046]/gtag [1047,1050]/gtag [1192,1195]	ttttaagt [115,122]	none	attgtct [276,282]/attatct [1141,1147]
3MMUR000002556_CR000022708 116	none	none	none	none
3MMUR000046892_CR001641128 76	none	none	none	none
3MMUR000041088_CR000988983 258	none	ttttat [54,59]	none	none
3MMUR000001514_CR000014656 648	gtagt [312,316]	ttttaaat [590,597]/ttttaagt [601,608]	none	none
3MMUR000019508_CR000738081 1504	atagt [62,66]/atagt [833,837]/gtag [1065,1068]	ttttat [58,63]/ttttat [1463,1468]/ttttcat [1497,1503]	none	none
3MMUR000044133_CR001340961 1604	gtagt [605,609]/atagt [1362,1366]	ttttcat [143,149]	none	tttgtct [552,558]/tttgtct [1538,1544]
3MMUR000016975_CR000709770 79	none	ttttcat [27,33]	none	none
3MMUR000011302_CR000660582 173	atagt [108,112]	ttttat [145,150]	none	none
3MMUR000000764_CR000007133 486	gtagt [163,167]/gtagt [389,393]	ttttat [368,373]	none	none
3MMUR000001658_CR000015861 4630	atagt [1007,1011]/atagt [1390,1394]/gtagt [2118,2122]/atagt [2146,2150]/atagt [2910,2914]/atagt [3280,3284]/gtagt [3524,3528]/gtagt [4336,4340]/gtag [4373,4376]/gtag [4463,4466]	ttttat [146,151]/ttttat [777,782]/ttttat [1251,1256]/ttttat [2214,2219]/ttttat [2428,2433]/ttttat [3032,3037]/ttttat [3779,3784]/ttttaat [4202,4208]	tgtacata [3389,3396]	tttgtct [246,252]/tttatct [970,976]/tttgtct [1035,1041]/tttatct [1497,1503]/tttgtct [2058,2064]/attatct [2984,2990]/attatct [3961,3967]
3MMUR000000854_CR000007750 2274	atagt [719,723]/gtagt [1033,1037]/gtagt [1063,1067]/atagt [2218,2222]	ttttat [84,89]/ttttat [317,322]/ttttat [1080,1085]/ttttat [1133,1138]/ttttat [1157,1162]/ttttat [1220,1225]/ttttat [1348,1353]/ttttat [1956,1961]/ttttat [2122,2127]/ttttat [2157,2162]	tgtagata [378,385]/tgtatata [475,482]/tgtatata [609,616]/tgtatata [625,632]	attatct [88,94]
3MMUR000041405_CR000991970 1113	attagt [446,451]/gtag [988,991]	ttttat [625,630]	tgtaaata [418,425]	tttatct [336,342]
3MMUR000018471_CR000726866 1858	gtagt [911,915]/atagt [994,998]/gtagt [1116,1120]/gtag [1520,1523]/gtag [1533,1536]	ttttat [129,134]/ttttat [216,221]/ttttat [592,597]/ttttat [1315,1320]/ttttact [1806,1812]/ttttact [1829,1835]	none	tttgtct [552,558]
3MMUR000041457_CR000992463 1149	gtag [320,323]/gtag [335,338]/gtag [635,638]/gtag [746,749]/gtag [794,797]	ttttat [263,268]/ttttat [939,944]/ttttat [1091,1096]	tgtatata [1040,1047]	tttatct [264,270]
3MMUR000005475_CR000402000 1270	gtagt [91,95]/gtagt [884,888]	ttttat [676,681]/ttttat [731,736]/ttttat [930,935]	tgtacata [720,727]	none
3MMUR000020763_CR000751581 790	none	ttttat [298,303]/ttttact [355,361]/ttttcat [419,425]	none	none
3MMUR000043061_CR001057155 99	none	none	none	none
3MMUR000000801_CR000007393 3333	atagt [1203,1207]/atagt [1996,2000]/gtagt [2152,2156]/atagt [2470,2474]/atagt [2610,2614]/gtagt [2690,2694]/gtagt [2801,2805]/attagt [2838,2843]	ttttat [303,308]/ttttat [335,340]/ttttat [2201,2206]/ttttat [2477,2482]/ttttaaat [3054,3061]	tgtatata [2092,2099]	attgtct [1510,1516]
3MMUR000042443_CR001000892 1183	atagt [518,522]/gtag [893,896]	none	none	attatct [269,275]
3MMUR000017516_CR000716088 200	none	ttttaat [171,177]	none	none
3MMUR000001075_CR000010997 2539	gtagt [1695,1699]/gtag [2214,2217]/gtag [2231,2234]/gtag [2260,2263]	ttttat [934,939]/ttttact [2380,2386]	tgtacata [2347,2354]	none
3MMUR000014958_CR000690270 335	gtagt [278,282]	ttttat [312,317]	none	none
3MMUR000040164_CR000981947 497	none	none	none	attgtct [206,212]
3MMUR000000016_CR000000185 422	none	ttttat [250,255]	none	none
3MMUR000017511_CR000716058 560	atagt [282,286]	none	none	none
3MMUR000043885_CR001338177 229	none	none	none	none
3MMUR000014341_CR000685397 4173	gtagt [45,49]/atagt [503,507]/atagt [1348,1352]/gtagt [2098,2102]/atagt [2372,2376]/atagt [2993,2997]/atagt [3022,3026]/gtagt [3573,3577]/gtag [3858,3861]/gtag [4106,4109]	ttttat [795,800]/ttttat [1775,1780]/ttttat [3142,3147]/ttttat [3815,3820]/ttttat [3873,3878]/ttttat [3936,3941]/ttttat [3994,3999]/ttttat [4119,4124]	tgtaaata [1028,1035]	attatct [1171,1177]
3MMUR000013514_CR000678658 3585	atagt [1355,1359]/atagt [2309,2313]/atagt [2718,2722]/atagt [3191,3195]	ttttat [909,914]/ttttat [919,924]/ttttat [938,943]/ttttat [1061,1066]/ttttat [1081,1086]/ttttat [1233,1238]/ttttat [2942,2947]/ttttat [3573,3578]	tgtatata [2136,2143]	tttatct [1082,1088]/tttgtct [2078,2084]
3MMUR000015072_CR000691110 1181	gtag [324,327]/gtag [547,550]/gtag [1058,1061]	none	none	none
3MMUR000043654_CR001335449 3180	gtagt [2586,2590]/atagt [2637,2641]/gtagt [2644,2648]/gtag [2891,2894]	ttttat [507,512]/ttttat [517,522]/ttttat [527,532]/ttttat [537,542]/ttttat [3076,3081]/ttttat [3112,3117]	none	tttgtct [1397,1403]/tttgtct [1463,1469]/tttgtct [2339,2345]
3MMUR000013896_CR000681535 131	gtag [88,91]	none	none	none
3MMUR000016237_CR000701042 391	atagt [243,247]	none	tgtaaata [238,245]	none
3MMUR000004425_CR000391854 149	gttagt [26,31]	none	none	none
3MMUR000018365_CR000725685 392	gtagt [230,234]	none	none	none
3MMUR000007492_CR000620254 392	none	ttttat [197,202]	none	none
3MMUR000014142_CR000683414 700	attagt [453,458]/gtag [585,588]/gtag [647,650]	none	none	tttatct [578,584]
3MMUR000021135_CR000755833 860	atagt [112,116]/gtagt [389,393]/atagt [594,598]/gtag [610,613]	ttttat [331,336]/ttttaat [829,835]	tgtaaata [575,582]	none
3MMUR000002008_CR000018477 896	atagt [784,788]	ttttat [887,892]	none	tttgtct [698,704]
3MMUR000040594_CR000985503 3156	gtagt [62,66]/atagt [858,862]/gtagt [952,956]/atagt [1624,1628]/gtagt [1908,1912]/gttagt [2316,2321]/atttagt [2572,2578]	ttttat [420,425]/ttttat [1277,1282]/ttttat [1320,1325]/ttttat [1927,1932]/ttttat [1982,1987]/ttttat [2699,2704]/ttttat [2868,2873]/ttttaaat [3079,3086]	none	tttatct [993,999]/tttatct [1983,1989]
3MMUR000018722_CR000729469 688	gtagt [374,378]/gtagt [424,428]	none	none	none
3MMUR000016031_CR000699250 369	none	none	tgtaaata [205,212]	none
3MMUR000040139_CR000981714 235	none	none	none	none
3MMUR000011239_CR000659131 460	atagt [299,303]/gtag [372,375]	none	tgtaaata [431,438]	none
3MMUR000045150_CR001446068 376	gtag [154,157]	none	none	none
3MMUR000002940_CR000026480 297	none	none	none	none
3MMUR000015247_CR000692599 353	gtagt [62,66]/gtagt [97,101]	none	none	none
3MMUR000018625_CR000728372 486	atagt [28,32]/atagt [188,192]/atagt [217,221]/gttagt [315,320]/gtag [398,401]	ttttat [360,365]	none	none
3MMUR000011016_CR000657109 1551	atagt [175,179]/atagt [1508,1512]	none	none	tttgtct [843,849]
3MMUR000005518_CR000402283 507	gtagt [198,202]/atagt [284,288]	ttttat [293,298]	none	none
3MMUR000013073_CR000675451 46	none	none	none	none
3MMUR000008400_CR000628798 1047	gtag [125,128]/gtag [227,230]/gtag [311,314]/gtag [482,485]/gtag [740,743]/gtag [915,918]	none	none	none
3MMUR000019148_CR000734097 1063	atagt [130,134]/atagt [273,277]/gtagt [462,466]/atagt [522,526]	ttttat [549,554]/ttttat [567,572]/ttttat [1029,1034]	none	none
3MMUR000000738_CR000006950 649	gttagt [94,99]/gtag [234,237]/gtag [570,573]/gtag [601,604]	ttttat [304,309]/ttttat [580,585]	tgtatata [370,377]	none
3MMUR000043060_CR001057148 712	atagt [320,324]	ttttat [564,569]	none	none
3MMUR000012212_CR000667855 171	none	ttttat [105,110]/ttttcat [112,118]	none	none
3MMUR000045487_CR001448872 1968	atagt [1395,1399]/gtag [1572,1575]	none	none	none
3MMUR000018090_CR000722439 588	gtag [115,118]/gtag [238,241]	ttttcat [320,326]	tgtaaata [193,200]	none
3MMUR000043264_CR001210071 5628	atagt [164,168]/gtagt [2741,2745]/atagt [3352,3356]/atagt [3551,3555]/atagt [3859,3863]/atagt [4053,4057]/atagt [4068,4072]/gtagt [5250,5254]	ttttat [1911,1916]/ttttat [2562,2567]/ttttat [4046,4051]/ttttat [5379,5384]/ttttat [5392,5397]/ttttat [5434,5439]/ttttcat [5484,5490]	tgtacata [5187,5194]	none
3MMUR000044196_CR001341431 892	gtag [3,6]/gtag [369,372]/gtag [476,479]	ttttact [719,725]	none	none
3MMUR000000317_CR000003888 588	none	none	none	none
3MMUR000040975_CR000988202 353	gtag [128,131]	ttttat [215,220]	none	none
3MMUR000004538_CR000393776 228	gtag [104,107]/gtag [131,134]	ttttat [42,47]/ttttat [152,157]	none	none
3MMUR000016497_CR000704039 1912	atagt [641,645]/gtagt [1079,1083]/gtagt [1277,1281]/gtag [1291,1294]	ttttat [1647,1652]/ttttat [1896,1901]	tgtaaata [1625,1632]	none
3MMUR000012503_CR000670384 1827	atagt [1487,1491]/atagt [1560,1564]	ttttat [282,287]/ttttat [1822,1827]	tgtacata [1555,1562]	tttatct [283,289]
3MMUR000008659_CR000631565 190	none	none	none	none
3MMUR000015714_CR000696547 2356	atagt [1781,1785]/gtagt [1829,1833]/atagt [2074,2078]/gtag [2229,2232]	ttttat [1518,1523]	tgtatata [712,719]	tttgtct [697,703]/tttgtct [1444,1450]/tttgtct [2142,2148]
3MMUR000012078_CR000666893 1993	atagt [478,482]/atagt [608,612]/gtagt [1048,1052]/atagt [1518,1522]/gttagt [1527,1532]/gtag [1563,1566]	ttttat [711,716]/ttttat [1884,1889]	none	none
3MMUR000019233_CR000734989 32	none	none	none	none
3MMUR000019652_CR000739502 591	gtagt [407,411]	ttttat [571,576]	none	tttgtct [238,244]
3MMUR000018495_CR000727128 539	atagt [138,142]	none	none	tttgtct [429,435]
3MMUR000020721_CR000751142 5266	gtagt [2787,2791]/gtagt [3721,3725]/gtag [3926,3929]/gtag [4292,4295]	ttttat [472,477]/ttttat [1854,1859]/ttttaaat [3530,3537]	none	tttgtct [2089,2095]
3MMUR000016376_CR000702664 941	gtagt [261,265]/atagt [272,276]/atagt [642,646]/gtag [882,885]	none	tgtagata [881,888]	tttatct [721,727]/tttgtct [781,787]
3MMUR000010773_CR000654716 1021	gtagt [106,110]/atagt [198,202]/gtagt [215,219]/gtag [550,553]/gtag [659,662]/gtag [684,687]/gtag [799,802]	ttttat [526,531]/ttttat [830,835]	none	none
3MMUR000016095_CR000699726 1406	atagt [976,980]/atagt [1082,1086]/gtagt [1295,1299]	ttttaat [120,126]/ttttaaat [348,355]	none	none
3MMUR000021178_CR000756177 2271	atagt [306,310]/gtagt [2235,2239]/gtag [2256,2259]	ttttat [371,376]/ttttat [2108,2113]	none	none
3MMUR000046996_CR001641628 115	none	none	none	none
3MMUR000020097_CR000743800 755	none	ttttcat [691,697]	none	attgtct [696,702]
3MMUR000015869_CR000697832 516	atagt [324,328]/gtag [401,404]	ttttat [82,87]/ttttat [131,136]	none	none
3MMUR000010240_CR000648690 187	gtag [96,99]	none	none	none
3MMUR000002900_CR000026112 2299	atagt [106,110]/atagt [430,434]/atagt [599,603]/gtagt [997,1001]/atagt [1988,1992]/atagt [2045,2049]/gtag [2103,2106]	none	none	none
3MMUR000006707_CR000616291 471	none	none	none	none
3MMUR000043484_CR001272827 1532	gtagt [142,146]/gtagt [189,193]/atagt [513,517]/atagt [606,610]/atagt [1215,1219]/atagt [1341,1345]	ttttat [205,210]/ttttaat [1346,1352]	none	tttgtct [1514,1520]
3MMUR000001500_CR000014538 433	atagt [234,238]	ttttaat [389,395]	none	none
3MMUR000044602_CR001344930 802	gtagt [430,434]/atagt [789,793]	ttttaat [435,441]/ttttcat [679,685]	none	none
3MMUR000001330_CR000013109 1998	atagt [635,639]/gtagt [698,702]/atagt [707,711]/gtagt [816,820]/gtag [1263,1266]	ttttat [1058,1063]/ttttaat [1797,1803]/ttttaat [1855,1861]	none	tttgtct [178,184]
3MMUR000046521_CR001639330 222	none	none	none	none
3MMUR000001076_CR000011005 1888	atagt [1455,1459]/gtag [1598,1601]	ttttat [322,327]/ttttat [1646,1651]/ttttat [1670,1675]/ttttat [1677,1682]/ttttaat [1683,1689]	none	none
3MMUR000019356_CR000736383 60	none	none	none	none
3MMUR000007521_CR000620391 1831	gtag [595,598]/gtag [619,622]/gtag [1556,1559]/gtag [1593,1596]	none	none	attatct [587,593]
3MMUR000020583_CR000749496 220	none	none	none	none
3MMUR000011213_CR000658894 168	atagt [83,87]	none	none	none
3MMUR000011704_CR000664039 3107	gtagt [1122,1126]/gtagt [1165,1169]/gtagt [1758,1762]/atagt [2776,2780]	ttttat [2112,2117]/ttttat [2722,2727]/ttttcat [2859,2865]	tgtatata [1598,1605]	tttgtct [1751,1757]/attgtct [1983,1989]/tttatct [2113,2119]
3MMUR000007398_CR000619803 871	gtag [72,75]/gtag [115,118]/gtag [529,532]/gtag [672,675]/gtag [752,755]/gtag [757,760]	none	none	none
3MMUR000018529_CR000727472 53	atagt [43,47]	none	none	none
3MMUR000014094_CR000683028 184	none	none	none	none
3MMUR000000227_CR000003176 1190	atagt [410,414]/gtagt [796,800]	ttttat [487,492]/ttttat [555,560]/ttttaat [642,648]/ttttaaat [897,904]	tgtaaata [501,508]/tgtaaata [820,827]	attgtct [376,382]/tttatct [488,494]/tttatct [556,562]
3MMUR000018843_CR000730842 2379	gtagt [673,677]/gtagt [974,978]/atagt [1434,1438]/gtagt [1902,1906]/atagt [2123,2127]	ttttat [148,153]/ttttaat [171,177]/ttttaaat [2369,2376]	tgtagata [2011,2018]/tgtatata [2244,2251]	attgtct [2278,2284]
3MMUR000042811_CR001054373 1722	gtagt [1087,1091]/gtag [1190,1193]/gtag [1556,1559]	ttttaaat [1354,1361]	tgtatata [1203,1210]/tgtatata [1211,1218]	none
3MMUR000008474_CR000629645 1138	atagt [445,449]/atagt [1015,1019]	ttttaat [737,743]	none	none
3MMUR000016541_CR000704518 3504	gtagt [283,287]/atagt [308,312]/atagt [346,350]/atagt [354,358]/atagt [930,934]/atagt [1198,1202]/gtagt [2505,2509]/atagt [2966,2970]/gtagt [3041,3045]/attagt [3107,3112]	ttttat [1005,1010]/ttttat [1774,1779]/ttttat [2351,2356]/ttttat [2995,3000]/ttttat [3060,3065]	tgtacata [3265,3272]	none
3MMUR000017802_CR000719285 580	gtag [148,151]/gtag [198,201]/gtag [244,247]/gtag [521,524]	none	tgtaaata [550,557]	none
3MMUR000044435_CR001343518 307	gtagt [220,224]	ttttat [200,205]/ttttaat [274,280]	none	none
3MMUR000016599_CR000705185 521	gttagt [146,151]/gtag [283,286]/gtag [325,328]	ttttaagt [513,520]	none	tttgtct [104,110]/tttgtct [464,470]
3MMUR000017149_CR000711955 61	none	none	none	none
3MMUR000010268_CR000649028 132	none	none	none	none
3MMUR000005617_CR000402991 2074	gtagt [140,144]/gtagt [897,901]/atttagt [1945,1951]	ttttat [2006,2011]/ttttat [2040,2045]	none	tttgtct [1904,1910]
3MMUR000013854_CR000681170 89	none	none	none	none
3MMUR000016619_CR000705438 245	gtag [70,73]	none	none	none
3MMUR000043033_CR001056923 1489	atagt [137,141]/atagt [666,670]/gtagt [1355,1359]	ttttact [978,984]/ttttact [1450,1456]	none	attgtct [370,376]
3MMUR000017191_CR000712515 1106	atagt [99,103]/atagt [470,474]/gtagt [501,505]/atagt [619,623]/gtagt [828,832]/gtag [905,908]	ttttaaat [479,486]	none	tttgtct [231,237]
3MMUR000045295_CR001447301 3221	gtagt [1294,1298]/gttagt [1304,1309]/gttagt [1389,1394]/attagt [1958,1963]/attagt [2046,2051]/attagt [2815,2820]/gtag [2993,2996]	ttttat [962,967]/ttttaat [1244,1250]/ttttaat [2851,2857]	tgtaaata [2711,2718]	tttatct [2348,2354]
3MMUR000018297_CR000724918 1170	gtagt [209,213]/gtagt [306,310]/gtagt [431,435]/gtag [484,487]/gtag [535,538]/gtag [588,591]/gtag [641,644]/gtag [975,978]	none	none	none
3MMUR000013703_CR000680064 1583	none	ttttat [1388,1393]	none	none
3MMUR000047633_CR001644804 433	atagt [217,221]	none	none	attgtct [206,212]
3MMUR000047122_CR001642252 16	none	none	none	none
3MMUR000011105_CR000657995 1650	atagt [147,151]/atagt [196,200]/atagt [234,238]/gtagt [521,525]/atagt [1081,1085]/attagt [1429,1434]	ttttat [1246,1251]/ttttaat [1282,1288]	none	none
3MMUR000040022_CR000980751 130	attagt [63,68]	none	none	none
3MMUR000010010_CR000645999 2063	atagt [630,634]/atagt [1100,1104]/gtagt [1858,1862]	ttttat [397,402]/ttttat [793,798]/ttttat [1278,1283]/ttttat [2021,2026]	tgtatata [1407,1414]/tgtaaata [1772,1779]	tttgtct [677,683]
3MMUR000010348_CR000649882 1785	atttagt [535,541]/gtag [604,607]/gtag [777,780]/gtag [1196,1199]	ttttat [1267,1272]/ttttat [1403,1408]/ttttaaat [1750,1757]	none	tttgtct [1369,1375]
3MMUR000004528_CR000393560 380	none	none	none	none
3MMUR000011706_CR000664053 105	none	ttttat [61,66]	none	none
3MMUR000000060_CR000001972 548	gtag [422,425]	ttttaaat [507,514]	none	none
3MMUR000041959_CR000996817 5846	atagt [205,209]/gtagt [218,222]/gtagt [589,593]/atagt [602,606]/atagt [1052,1056]/atagt [1348,1352]/gtagt [1772,1776]/atagt [1860,1864]/atagt [2074,2078]/atagt [2154,2158]/gtagt [2429,2433]/atagt [3125,3129]/gtagt [3279,3283]/gtagt [3536,3540]/atagt [3587,3591]/gtagt [3877,3881]/atagt [4437,4441]/gtagt [4948,4952]/atagt [5441,5445]/atagt [5473,5477]/gtag [5733,5736]	ttttat [511,516]/ttttat [763,768]/ttttat [988,993]/ttttat [1421,1426]/ttttat [2285,2290]/ttttat [3487,3492]/ttttat [3506,3511]/ttttat [3934,3939]/ttttat [5136,5141]/ttttat [5375,5380]	none	tttgtct [292,298]/tttgtct [922,928]/attatct [1753,1759]/attgtct [2118,2124]/attatct [3213,3219]/tttgtct [3233,3239]/tttatct [4323,4329]/attatct [5426,5432]/attatct [5809,5815]
3MMUR000012615_CR000671507 878	atagt [113,117]/atagt [675,679]	ttttat [853,858]	tgtaaata [832,839]	tttgtct [846,852]
3MMUR000005320_CR000400947 58	none	none	none	none
3MMUR000043884_CR001338170 228	none	none	none	none
3MMUR000041965_CR000996869 1777	gtagt [542,546]/gtagt [1044,1048]/atagt [1429,1433]/atagt [1459,1463]/gtagt [1469,1473]/gtagt [1724,1728]	ttttat [747,752]/ttttaat [1702,1708]/ttttaat [1748,1754]	none	none
3MMUR000014843_CR000689356 1435	atagt [421,425]/gtag [431,434]/gtag [1112,1115]	ttttat [1404,1409]	none	none
3MMUR000043163_CR001209282 550	gtagt [137,141]/attagt [382,387]	none	none	none
3MMUR000011159_CR000658530 564	gtagt [489,493]/atagt [496,500]	ttttaat [539,545]	none	none
3MMUR000020957_CR000753676 144	none	none	none	none
3MMUR000008739_CR000632361 1425	gtagt [86,90]/atagt [141,145]/gtagt [218,222]/gtagt [338,342]/atagt [1249,1253]	ttttat [1259,1264]/ttttaaat [1413,1420]	none	none
3MMUR000001469_CR000014291 4250	gtagt [112,116]/atagt [265,269]/atagt [694,698]/atagt [1457,1461]/gtagt [1645,1649]/atagt [3077,3081]/gtag [3376,3379]/gtag [3730,3733]/gtag [3848,3851]	ttttat [48,53]/ttttat [966,971]/ttttat [3144,3149]	none	attgtct [658,664]/tttatct [967,973]/attgtct [1719,1725]/tttgtct [3112,3118]
3MMUR000001449_CR000014144 628	gtag [9,12]	ttttat [528,533]	none	none
3MMUR000042466_CR001001106 5548	atagt [1538,1542]/atagt [1988,1992]/atagt [2081,2085]/gtagt [2840,2844]/gtagt [3381,3385]/atagt [3763,3767]/gtagt [3953,3957]/atagt [4623,4627]/gtagt [4907,4911]/atagt [5074,5078]/atagt [5398,5402]	ttttat [2608,2613]/ttttat [3723,3728]/ttttat [4331,4336]/ttttaat [4927,4933]	tgtacata [5514,5521]	attgtct [2783,2789]/attgtct [5464,5470]
3MMUR000044625_CR001345089 3030	gtagt [2699,2703]/gtagt [2741,2745]	ttttat [2779,2784]	tgtaaata [2994,3001]	tttgtct [1574,1580]
3MMUR000040986_CR000988278 1562	gtagt [754,758]/atagt [844,848]/gtagt [1291,1295]/gtagt [1478,1482]	ttttat [1456,1461]	none	attatct [1407,1413]
3MMUR000009101_CR000636222 2176	gtagt [709,713]/gtagt [1133,1137]/gtagt [1212,1216]/gtagt [2014,2018]	none	none	none
3MMUR000008728_CR000632297 2293	gtag [354,357]/gtag [376,379]/gtag [434,437]/gtag [533,536]/gtag [642,645]/gtag [1659,1662]/gtag [1684,1687]	ttttat [1364,1369]/ttttat [2249,2254]	tgtaaata [1409,1416]	none
3MMUR000046626_CR001639839 53	none	none	none	none
3MMUR000009920_CR000645112 482	none	none	tgtacata [263,270]	none
3MMUR000001909_CR000017709 240	gtag [40,43]	ttttat [231,236]	none	tttatct [232,238]
3MMUR000008741_CR000632377 626	gtagt [509,513]	ttttaat [268,274]	none	none
3MMUR000017852_CR000719806 1778	gtag [930,933]/gtag [1082,1085]	none	none	none
3MMUR000039747_CR000978567 2698	atagt [73,77]/atagt [945,949]/gtagt [1556,1560]/gtagt [2251,2255]	ttttat [115,120]/ttttat [599,604]/ttttaat [866,872]/ttttaaat [891,898]/ttttaaat [1186,1193]/ttttaagt [1921,1928]	none	none
3MMUR000021205_CR000756335 195	none	ttttat [23,28]	none	none
3MMUR000012314_CR000668605 3065	atagt [677,681]/gtagt [697,701]/gtagt [1063,1067]/gtagt [1574,1578]/gtagt [2100,2104]/atagt [2644,2648]/atagt [2804,2808]	ttttat [470,475]/ttttat [2581,2586]/ttttat [2605,2610]/ttttat [2713,2718]	tgtaaata [2373,2380]/tgtaaata [2815,2822]	attatct [1034,1040]
3MMUR000040912_CR000987758 1154	gttagt [785,790]	none	none	attgtct [234,240]
3MMUR000000696_CR000006644 888	gtagt [126,130]/atagt [668,672]/gtag [856,859]	ttttat [94,99]/ttttaat [561,567]	none	none
3MMUR000044418_CR001343368 333	none	none	none	none
3MMUR000046592_CR001639675 990	gnnnn [188,192]/nnnnn [193,197]/nnnnn [198,202]/nnnnn [203,207]/atagt [705,709]/atagt [842,846]	nnnnnn [189,194]/nnnnnn [195,200]/nnnnnn [201,206]/ttttat [926,931]	tgnnnnnn [187,194]/nnnnnnnn [195,202]	nnnnnnn [189,195]/nnnnnnn [196,202]/tttgtct [612,618]/attgtct [776,782]
3MMUR000006402_CR000614742 80	none	none	none	none
3MMUR000014508_CR000686700 342	none	ttttat [292,297]/ttttaat [318,324]	none	attatct [329,335]
3MMUR000013507_CR000678617 594	none	ttttact [458,464]	none	none
3MMUR000013589_CR000679212 552	atagt [270,274]/gttagt [420,425]	ttttat [189,194]/ttttat [495,500]	none	none
3MMUR000042912_CR001055991 49	none	none	none	tttatct [41,47]
3MMUR000013801_CR000680801 118	none	none	none	none
3MMUR000001959_CR000018096 2752	atagt [55,59]/gtagt [85,89]/atagt [489,493]/gtagt [840,844]/gtagt [1078,1082]/atagt [1506,1510]/atagt [1817,1821]/atagt [2167,2171]/gtagt [2383,2387]/gttagt [2670,2675]	ttttat [2239,2244]/ttttaat [2442,2448]/ttttaagt [2732,2739]	tgtaaata [2694,2701]	attgtct [1147,1153]
3MMUR000009969_CR000645631 138	gtag [16,19]/gtag [118,121]	none	tgtaaata [92,99]	none
3MMUR000001447_CR000014126 1848	atagt [903,907]/gtagt [1485,1489]/atagt [1591,1595]	ttttaaat [1829,1836]	none	attatct [256,262]
3MMUR000008719_CR000632226 2992	atagt [468,472]/gtagt [664,668]/gtagt [1168,1172]/gtagt [1515,1519]/atagt [1745,1749]/atagt [1817,1821]/gtttagt [2613,2619]/gtag [2826,2829]	ttttat [594,599]/ttttat [2109,2114]/ttttat [2673,2678]/ttttat [2748,2753]/ttttat [2856,2861]	none	none
3MMUR000014710_CR000688398 849	atagt [505,509]/gtag [602,605]	ttttat [714,719]/ttttat [727,732]/ttttat [741,746]	none	none
3MMUR000012186_CR000667676 1689	gtagt [1129,1133]/gtagt [1464,1468]	ttttat [368,373]/ttttat [555,560]	none	none
3MMUR000039622_CR000977528 1648	gtagt [896,900]/gtag [1142,1145]/gtag [1483,1486]	ttttat [370,375]	none	tttgtct [136,142]
3MMUR000009634_CR000642054 720	gtagt [662,666]/gtagt [671,675]	none	none	none
3MMUR000041468_CR000992566 2909	atagt [408,412]/atagt [499,503]/atagt [1520,1524]/atagt [1754,1758]/atagt [2783,2787]	ttttat [1293,1298]/ttttcat [1997,2003]	tgtacata [494,501]	none
3MMUR000011819_CR000664940 3444	gtagt [1590,1594]/gtagt [2263,2267]/gtag [2323,2326]/gtag [2666,2669]/gtag [2697,2700]/gtag [2759,2762]/gtag [3169,3172]	ttttat [1339,1344]/ttttat [2123,2128]	tgtacata [159,166]/tgtagata [178,185]	tttatct [1524,1530]/tttatct [1541,1547]
3MMUR000041958_CR000996812 129	none	none	none	none
3MMUR000018068_CR000722151 1432	atagt [88,92]/gtagt [166,170]/gtagt [384,388]/atagt [675,679]	ttttat [1216,1221]/ttttat [1344,1349]	none	tttgtct [835,841]
3MMUR000005639_CR000403126 432	gtag [317,320]	none	none	none
3MMUR000002546_CR000022624 45	gtagt [14,18]	none	none	none
3MMUR000019723_CR000740177 733	atagt [48,52]/atagt [591,595]/gtag [670,673]	none	none	none
3MMUR000006398_CR000614709 341	gtag [210,213]/gtag [258,261]	ttttaagt [252,259]	none	none
3MMUR000014244_CR000684263 183	none	ttttat [116,121]	none	none
3MMUR000019707_CR000740010 2138	gtagt [89,93]/atagt [170,174]/atagt [807,811]/atagt [1212,1216]	ttttat [1012,1017]/ttttat [1378,1383]/ttttat [2001,2006]	tgtacata [633,640]	tttgtct [1624,1630]/attatct [1780,1786]
3MMUR000017470_CR000715634 1396	atagt [54,58]/atagt [145,149]/atagt [549,553]/gtagt [888,892]/atagt [969,973]/gtttagt [978,984]/gtag [1323,1326]	ttttat [562,567]/ttttaat [1336,1342]	none	tttgtct [1369,1375]
3MMUR000008587_CR000630799 1706	gtagt [803,807]/atagt [1386,1390]	ttttat [116,121]/ttttat [297,302]/ttttcat [619,625]	tgtatata [106,113]	attatct [138,144]
3MMUR000014951_CR000690218 3500	gtagt [334,338]/atagt [853,857]/atagt [1448,1452]/atagt [2023,2027]/atagt [2333,2337]/gtagt [2819,2823]/gtagt [2975,2979]/gtagt [2989,2993]/gtag [3178,3181]/gtag [3213,3216]/gtag [3267,3270]	ttttat [3077,3082]	none	none
3MMUR000009133_CR000636580 240	none	none	none	none
3MMUR000045601_CR001449726 2969	atagt [559,563]/atagt [988,992]/atagt [2142,2146]/gtagt [2256,2260]/gtagt [2754,2758]	ttttat [179,184]/ttttat [1081,1086]/ttttat [2385,2390]/ttttaat [2874,2880]	none	none
3MMUR000009241_CR000637873 877	gtag [186,189]/gtag [723,726]/gtag [730,733]/gtag [849,852]	none	none	none
3MMUR000011231_CR000659058 1642	atagt [154,158]/gtag [198,201]/gtag [1365,1368]	ttttat [236,241]/ttttat [249,254]/ttttat [634,639]/ttttat [1086,1091]/ttttat [1378,1383]	tgtatata [1389,1396]/tgtacata [1407,1414]	none
3MMUR000019766_CR000740579 1865	gtagt [248,252]/atagt [1014,1018]/gtagt [1265,1269]/gtagt [1524,1528]	ttttat [694,699]/ttttat [1491,1496]	none	none
3MMUR000003128_CR000030211 2774	gtagt [636,640]/gtagt [857,861]/atagt [1602,1606]	ttttat [569,574]/ttttcat [2521,2527]	none	tttatct [570,576]/tttgtct [2170,2176]
3MMUR000017751_CR000718713 202	none	none	none	none
3MMUR000002216_CR000020046 263	none	none	none	none
3MMUR000013750_CR000680404 117	none	none	none	attatct [66,72]
3MMUR000010945_CR000656533 965	gtag [901,904]	none	none	attatct [35,41]
3MMUR000009537_CR000641041 920	atagt [338,342]/atagt [502,506]/gtagt [884,888]	ttttat [334,339]/ttttat [702,707]	tgtatata [29,36]	none
3MMUR000001047_CR000010737 955	gtag [808,811]	ttttat [192,197]/ttttat [637,642]/ttttat [792,797]	tgtacata [464,471]	none
3MMUR000016015_CR000699080 3030	gtagt [200,204]/gtagt [1305,1309]/atagt [2966,2970]	none	tgtacata [968,975]/tgtacata [2751,2758]/tgtatata [2974,2981]	tttgtct [1714,1720]
3MMUR000043134_CR001209072 1738	gtagt [865,869]/gtag [1309,1312]	ttttat [124,129]/ttttat [510,515]/ttttaat [959,965]/ttttcat [1615,1621]	tgtaaata [591,598]	tttgtct [631,637]
3MMUR000012226_CR000667955 1133	gtag [368,371]	none	none	none
3MMUR000018218_CR000724070 100	none	none	none	none
3MMUR000009550_CR000641184 2559	atagt [84,88]/gtagt [823,827]/gtagt [1104,1108]/atagt [1114,1118]/gtagt [2316,2320]	ttttat [832,837]/ttttat [1660,1665]/ttttat [2158,2163]/ttttat [2196,2201]/ttttat [2239,2244]/ttttat [2517,2522]	tgtaaata [2508,2515]	none
3MMUR000041007_CR000988405 1879	atagt [68,72]/atagt [1145,1149]/gtagt [1299,1303]/gtag [1384,1387]/gtag [1452,1455]/gtag [1529,1532]/gtag [1533,1536]	ttttcat [1349,1355]	none	none
3MMUR000002595_CR000023051 98	gtag [4,7]	ttttat [14,19]	none	none
3MMUR000001308_CR000012938 2506	gtagt [1317,1321]/gtagt [1644,1648]/gtagt [2108,2112]	ttttcat [1408,1414]	none	tttgtct [481,487]
3MMUR000001921_CR000017806 216	none	none	none	none
3MMUR000045218_CR001446647 1400	gtagt [439,443]/atagt [1316,1320]/gtagt [1321,1325]	ttttat [864,869]	none	none
3MMUR000046768_CR001640558 2535	atagt [211,215]/attagt [268,273]/gtag [1031,1034]/gtag [1634,1637]/gtag [2018,2021]	ttttat [823,828]/ttttat [829,834]/ttttaat [2131,2137]/ttttaaat [2138,2145]	none	none
3MMUR000042961_CR001056334 185	none	none	none	none
3MMUR000015211_CR000692314 331	attagt [319,324]	none	tgtacata [233,240]	none
3MMUR000041249_CR000990671 305	gtagt [136,140]	none	none	none
3MMUR000018497_CR000727163 198	none	none	none	none
3MMUR000002639_CR000023387 742	none	ttttat [183,188]/ttttat [643,648]/ttttaaat [650,657]	none	tttgtct [204,210]
3MMUR000010591_CR000652622 1539	atagt [656,660]/atagt [1003,1007]/gtag [1231,1234]	none	none	tttgtct [1518,1524]
3MMUR000018486_CR000726999 532	gtagt [490,494]	ttttat [400,405]	none	none
3MMUR000017331_CR000714159 456	atagt [108,112]/atagt [303,307]/atagt [421,425]	ttttcat [141,147]	none	none
3MMUR000007244_CR000619002 954	gtag [728,731]	none	none	none
3MMUR000019697_CR000739924 3437	atagt [1179,1183]/gtagt [1660,1664]/atagt [1736,1740]/gtagt [2855,2859]/gtagt [3391,3395]/atagt [3419,3423]	ttttat [117,122]/ttttat [634,639]/ttttat [2361,2366]/ttttat [2661,2666]/ttttat [3046,3051]/ttttaat [3409,3415]	none	tttatct [2164,2170]/tttatct [3157,3163]
3MMUR000039555_CR000976891 297	gtag [233,236]	ttttat [47,52]	none	none
3MMUR000010696_CR000653905 792	gtttagt [585,591]/gtag [707,710]	none	none	none
3MMUR000043404_CR001271065 1825	atagt [1144,1148]/atagt [1803,1807]	ttttat [576,581]/ttttat [1168,1173]/ttttat [1605,1610]/ttttcat [1737,1743]	tgtatata [154,161]	tttgtct [92,98]/tttgtct [115,121]
3MMUR000046333_CR001638400 182	none	none	none	tttgtct [58,64]
3MMUR000002314_CR000020775 4209	atagt [416,420]/gtagt [592,596]/gtagt [839,843]/atagt [1005,1009]/atagt [1453,1457]/gtagt [1575,1579]/gtagt [2948,2952]/atagt [3308,3312]/atagt [3321,3325]/atagt [4102,4106]	ttttat [223,228]/ttttat [1943,1948]/ttttat [3223,3228]/ttttaat [3492,3498]/ttttaat [4070,4076]/ttttaat [4161,4167]	tgtatata [3370,3377]	tttatct [1136,1142]/tttgtct [2245,2251]
3MMUR000014919_CR000689965 2333	atagt [46,50]/gtagt [371,375]/gtagt [1311,1315]/atagt [2245,2249]	ttttat [28,33]/ttttat [228,233]/ttttat [1206,1211]	none	none
3MMUR000002569_CR000022822 1192	atagt [453,457]/atagt [815,819]/gtagt [948,952]	ttttat [85,90]/ttttat [970,975]/ttttact [1046,1052]	none	tttatct [971,977]
3MMUR000014313_CR000685107 1102	gtagt [150,154]/gtagt [725,729]/atagt [1033,1037]	ttttaat [894,900]	none	tttgtct [404,410]
3MMUR000015884_CR000697940 1186	atagt [1088,1092]	none	none	tttgtct [204,210]/tttgtct [524,530]/tttgtct [957,963]
3MMUR000012337_CR000668763 1161	gtagt [225,229]/atagt [1064,1068]	ttttat [368,373]/ttttat [837,842]/ttttat [1135,1140]	none	tttgtct [168,174]
3MMUR000017190_CR000712498 1903	gtag [656,659]/gtag [1189,1192]/gtag [1317,1320]	ttttat [159,164]/ttttat [244,249]/ttttat [1867,1872]	none	none
3MMUR000045033_CR001445231 1833	gtag [607,610]/gtag [1040,1043]	ttttat [239,244]/ttttat [893,898]/ttttat [1160,1165]/ttttat [1431,1436]/ttttat [1664,1669]/ttttat [1784,1789]	tgtacata [619,626]/tgtaaata [1776,1783]	tttgtct [642,648]/tttatct [1432,1438]
3MMUR000020279_CR000745914 1926	atagt [83,87]/atagt [264,268]/atagt [597,601]/gtagt [1373,1377]/atagt [1481,1485]/gtagt [1838,1842]	ttttat [444,449]/ttttat [1012,1017]/ttttaat [1869,1875]	none	tttatct [1701,1707]
3MMUR000043622_CR001335052 378	gtag [231,234]	ttttat [116,121]	none	none
3MMUR000016428_CR000703261 1225	atttagt [1055,1061]	none	none	tttatct [503,509]
3MMUR000020835_CR000752412 424	none	none	none	none
3MMUR000008613_CR000631069 1477	gtagt [386,390]/atagt [713,717]/atttagt [848,854]/gtag [869,872]	ttttat [1340,1345]	none	attgtct [1408,1414]
3MMUR000020942_CR000753475 84	none	none	none	none
3MMUR000001752_CR000016545 193	atagt [63,67]	none	none	none
3MMUR000041207_CR000990303 582	gtag [164,167]/gtag [192,195]	none	none	none
3MMUR000013778_CR000680639 466	gttagt [190,195]	ttttat [61,66]	none	none
3MMUR000041110_CR000989134 1026	gtagt [959,963]/gtagt [988,992]	none	none	none
3MMUR000017653_CR000717575 139	none	none	none	none
3MMUR000015207_CR000692286 3095	atagt [97,101]/gtagt [341,345]/atagt [433,437]/atagt [732,736]/gtagt [1108,1112]/gtagt [1195,1199]/gtagt [1226,1230]/atagt [1567,1571]/atagt [1781,1785]/gtagt [1855,1859]/atagt [2410,2414]/gtagt [2518,2522]/atagt [3039,3043]	ttttat [225,230]/ttttat [420,425]/ttttat [457,462]/ttttat [1982,1987]/ttttat [2118,2123]/ttttaat [3002,3008]	tgtagata [2237,2244]	tttatct [421,427]/tttgtct [737,743]/tttgtct [1865,1871]/attatct [2693,2699]/attgtct [2881,2887]
3MMUR000006325_CR000614272 176	none	none	none	none
3MMUR000002336_CR000020943 71	none	none	none	none
3MMUR000008951_CR000634531 2137	atagt [215,219]/gtagt [324,328]/atagt [345,349]/gtagt [406,410]/gtagt [1085,1089]/atagt [1127,1131]/gtag [1534,1537]/gtag [1885,1888]	ttttat [107,112]/ttttat [253,258]/ttttat [1353,1358]/ttttat [1741,1746]/ttttcat [1848,1854]	none	attgtct [51,57]/tttgtct [1385,1391]
3MMUR000009029_CR000635360 47	atttagt [31,37]	none	none	none
3MMUR000020135_CR000744224 30	none	none	none	none
3MMUR000014559_CR000687090 6509	atagt [19,23]/atagt [165,169]/atagt [1288,1292]/atagt [1617,1621]/gtagt [1776,1780]/atagt [2272,2276]/atagt [3058,3062]/atagt [3226,3230]/atagt [3837,3841]/atagt [3972,3976]/atagt [4459,4463]/atagt [4849,4853]/gtagt [4929,4933]/atagt [5117,5121]/gtagt [5192,5196]/gtagt [5230,5234]/gtagt [6008,6012]/gttagt [6265,6270]	ttttat [444,449]/ttttat [1507,1512]/ttttat [2870,2875]/ttttat [4250,4255]/ttttat [4384,4389]/ttttat [5343,5348]/ttttat [6276,6281]	tgtacata [3799,3806]/tgtaaata [5742,5749]	tttatct [1581,1587]/tttgtct [2876,2882]
3MMUR000043823_CR001337521 531	gtag [349,352]	ttttat [163,168]/ttttaat [504,510]	none	none
3MMUR000044925_CR001444315 594	gtagt [173,177]/gtag [207,210]/gtag [379,382]	ttttact [550,556]	none	none
3MMUR000004584_CR000394407 1761	gtag [440,443]/gtag [1721,1724]	none	none	tttgtct [1627,1633]
3MMUR000045067_CR001445472 3520	gtagt [2826,2830]/atagt [3497,3501]	ttttat [1698,1703]/ttttat [2477,2482]/ttttat [3095,3100]/ttttat [3186,3191]/ttttat [3225,3230]/ttttaat [3375,3381]	none	tttatct [1707,1713]/tttgtct [2954,2960]/tttgtct [3345,3351]/attatct [3509,3515]
3MMUR000009266_CR000638202 974	gtag [248,251]/gtag [695,698]/gtag [809,812]	ttttat [833,838]	none	none
3MMUR000014977_CR000690403 795	gtagt [364,368]	none	none	none
3MMUR000044316_CR001342472 1144	gtagt [426,430]/atagt [499,503]/gtagt [682,686]/atagt [1037,1041]	ttttat [731,736]/ttttat [1044,1049]	none	tttatct [31,37]
3MMUR000047108_CR001642187 222	none	none	none	none
3MMUR000012897_CR000674028 2307	atagt [186,190]/gtagt [390,394]/atagt [434,438]/gtagt [768,772]/atagt [1588,1592]/gtagt [1848,1852]/gtag [2038,2041]	ttttat [370,375]/ttttat [468,473]/ttttat [589,594]/ttttat [1333,1338]/ttttaat [1552,1558]/ttttaat [2137,2143]	none	tttatct [1155,1161]
3MMUR000043759_CR001336697 177	gtag [91,94]/gtag [96,99]	none	none	none
3MMUR000009162_CR000636944 245	gtag [166,169]	none	none	none
3MMUR000014024_CR000682518 1873	gtagt [31,35]/atagt [823,827]/atagt [830,834]/atagt [1403,1407]/gttagt [1474,1479]	ttttat [169,174]/ttttat [465,470]/ttttat [476,481]/ttttat [802,807]/ttttat [1728,1733]/ttttat [1739,1744]	tgtatata [1811,1818]	attatct [806,812]
3MMUR000044179_CR001341292 896	gttagt [459,464]/gtag [547,550]	none	none	none
3MMUR000010155_CR000647722 134	none	ttttat [20,25]	none	none
3MMUR000020850_CR000752549 862	atagt [106,110]/gtagt [304,308]/gtag [395,398]/gtag [846,849]	none	none	tttgtct [763,769]
3MMUR000017562_CR000716503 227	gtagt [105,109]/gtagt [131,135]	none	none	none
3MMUR000014532_CR000686891 481	atagt [271,275]	ttttat [433,438]	none	none
3MMUR000043595_CR001334805 1666	gtag [1537,1540]	ttttat [430,435]	none	none
3MMUR000002360_CR000021111 2973	atagt [241,245]/gtagt [740,744]/gtagt [1748,1752]/gtag [1818,1821]/gtag [2002,2005]/gtag [2709,2712]	ttttat [1048,1053]/ttttat [2491,2496]/ttttat [2776,2781]/ttttat [2936,2941]/ttttat [2942,2947]	none	tttatct [727,733]/attatct [1491,1497]/attatct [2498,2504]
3MMUR000011834_CR000665055 113	none	ttttaaat [75,82]	tgtacata [66,73]	none
3MMUR000010658_CR000653508 121	none	none	none	none
3MMUR000045488_CR001448883 855	atagt [540,544]	ttttact [507,513]	tgtatata [713,720]	attgtct [791,797]
3MMUR000012610_CR000671477 701	gtag [647,650]	none	tgtaaata [636,643]/tgtagata [646,653]	none
3MMUR000000835_CR000007618 2886	gtagt [1147,1151]/gtagt [1251,1255]/gtagt [1518,1522]/atagt [2006,2010]/atagt [2233,2237]/attagt [2576,2581]	ttttat [2800,2805]/ttttat [2812,2817]	tgtagata [825,832]/tgtaaata [2830,2837]	attgtct [1507,1513]/tttatct [2813,2819]
3MMUR000010885_CR000655837 2822	atagt [2360,2364]/atagt [2582,2586]/gtagt [2640,2644]/gtag [2664,2667]/gtag [2727,2730]	ttttat [471,476]/ttttaat [985,991]	tgtagata [1963,1970]	tttatct [2738,2744]
3MMUR000019230_CR000734946 1324	atagt [213,217]/atagt [227,231]/atagt [240,244]/gtagt [341,345]/atagt [601,605]/attagt [832,837]/gttagt [911,916]/gttagt [1293,1298]	ttttat [920,925]	none	attatct [631,637]
3MMUR000004683_CR000395960 1994	gtagt [913,917]/gtagt [1246,1250]/gtagt [1268,1272]/atagt [1376,1380]/gtttagt [1410,1416]	ttttat [1664,1669]/ttttaaat [1722,1729]	none	tttatct [1173,1179]
3MMUR000011060_CR000657459 557	gtagt [330,334]	none	none	none
3MMUR000015637_CR000695899 2666	gtagt [1216,1220]/atagt [2020,2024]/atagt [2195,2199]/gtagt [2240,2244]/gtagt [2452,2456]/atagt [2515,2519]	ttttat [2548,2553]	tgtaaata [982,989]	attgtct [1464,1470]/tttgtct [2163,2169]
3MMUR000009347_CR000639137 950	gtagt [339,343]/atagt [573,577]/gtag [638,641]/gtag [928,931]	ttttat [438,443]/ttttaat [933,939]	none	attgtct [51,57]
3MMUR000040423_CR000984143 510	gtag [81,84]	ttttat [161,166]/ttttat [448,453]	tgtaaata [195,202]	tttgtct [139,145]
3MMUR000046271_CR001637848 1199	atagt [967,971]/gtag [1061,1064]/gtag [1098,1101]	ttttat [793,798]/ttttat [851,856]/ttttat [1152,1157]	tgtaaata [463,470]	none
3MMUR000018688_CR000729067 83	gtag [14,17]	none	none	none
3MMUR000045199_CR001446452 2264	gtagt [856,860]/gtag [917,920]/gtag [934,937]/gtag [1235,1238]/gtag [2015,2018]	none	none	none
3MMUR000010958_CR000656661 557	gtagt [330,334]	none	none	none
3MMUR000017413_CR000715043 1743	atagt [561,565]/atagt [735,739]/gtagt [1162,1166]/gtagt [1347,1351]/gtag [1364,1367]	ttttaat [194,200]/ttttaaat [1384,1391]	none	none
3MMUR000042071_CR000997751 4285	gtagt [531,535]/gtagt [1015,1019]/atagt [1469,1473]/gtagt [1795,1799]/atagt [2109,2113]/gtagt [2728,2732]/gtagt [3533,3537]/atagt [3571,3575]/atagt [3634,3638]/gttagt [4070,4075]/attagt [4179,4184]/gtag [4238,4241]	ttttat [444,449]/ttttat [3901,3906]/ttttat [3935,3940]/ttttat [4162,4167]	tgtatata [3657,3664]/tgtagata [4237,4244]	attgtct [3364,3370]
3MMUR000014128_CR000683321 493	gtag [437,440]	ttttat [26,31]	none	attgtct [30,36]
3MMUR000043914_CR001338519 433	gtag [364,367]	none	none	none
3MMUR000005253_CR000400477 2350	gtagt [2262,2266]	ttttat [863,868]/ttttat [1944,1949]/ttttaat [2281,2287]	tgtatata [1506,1513]	attatct [867,873]/tttatct [997,1003]
3MMUR000020269_CR000745776 287	none	none	none	none
3MMUR000040221_CR000982500 957	gtag [268,271]/gtag [689,692]/gtag [767,770]	none	none	none
3MMUR000004818_CR000397156 311	gtag [152,155]	none	none	none
3MMUR000040632_CR000985778 2877	gtagt [737,741]/atagt [993,997]/atagt [1882,1886]/atagt [2134,2138]/atagt [2635,2639]/atttagt [2666,2672]/gtag [2741,2744]	ttttat [53,58]/ttttat [68,73]/ttttat [370,375]/ttttat [1793,1798]/ttttaat [2461,2467]	none	tttgtct [230,236]
3MMUR000041754_CR000995046 74	none	none	none	none
3MMUR000012297_CR000668487 1559	gtagt [198,202]/gtagt [387,391]/atagt [635,639]/gtagt [801,805]/gtagt [971,975]/gtag [1461,1464]	ttttat [155,160]/ttttat [910,915]/ttttcat [1353,1359]	tgtacata [1058,1065]	none
3MMUR000010214_CR000648414 863	gtagt [478,482]/gtag [600,603]/gtag [710,713]	none	none	none
3MMUR000046454_CR001639006 63	none	none	none	none
3MMUR000013795_CR000680764 54	none	none	none	none
3MMUR000045560_CR001449438 1741	gtagt [1404,1408]/atagt [1447,1451]/atagt [1452,1456]/atagt [1628,1632]/gtag [1636,1639]	ttttat [1675,1680]	none	none
3MMUR000019252_CR000735208 1110	gtagt [101,105]/gtagt [252,256]/atagt [289,293]/atagt [371,375]/atagt [659,663]/atagt [738,742]/atagt [950,954]/gtagt [1032,1036]	none	none	none
3MMUR000013226_CR000676529 226	attagt [48,53]/gtag [126,129]	none	tgtaaata [206,213]	none
3MMUR000046859_CR001640983 103	none	none	none	none
3MMUR000013182_CR000676224 642	gtagt [193,197]/gtagt [438,442]	ttttat [232,237]	tgtaaata [619,626]	none
3MMUR000014647_CR000687939 1030	gtag [415,418]	none	none	none
3MMUR000018453_CR000726636 2388	gtagt [851,855]/gtagt [1843,1847]/gtagt [2105,2109]/gttagt [2131,2136]	ttttat [1396,1401]/ttttat [1419,1424]/ttttat [2077,2082]/ttttat [2295,2300]	none	tttgtct [786,792]/attatct [1602,1608]
3MMUR000015700_CR000696448 91	gtagt [83,87]	none	none	none
3MMUR000010227_CR000648546 384	gtag [90,93]/gtag [247,250]	none	none	none
3MMUR000015456_CR000694409 1952	gttagt [1788,1793]	none	none	none
3MMUR000011875_CR000665357 742	gtag [204,207]/gtag [269,272]	ttttat [238,243]/ttttat [698,703]	none	tttatct [239,245]
3MMUR000045376_CR001447954 185	none	none	none	none
3MMUR000016552_CR000704652 144	none	none	none	tttatct [86,92]
3MMUR000008854_CR000633510 451	none	ttttat [216,221]	none	none
3MMUR000016461_CR000703638 701	attagt [32,37]/gtag [537,540]	none	none	none
3MMUR000041963_CR000996852 733	atagt [671,675]	none	none	none
3MMUR000016972_CR000709743 1061	gtag [255,258]	ttttaat [1005,1011]	tgtaaata [988,995]/tgtatata [1021,1028]	tttgtct [789,795]
3MMUR000039830_CR000979205 212	gtag [173,176]	none	none	none
3MMUR000011637_CR000663541 2830	gtagt [684,688]/gtagt [1467,1471]/atagt [2599,2603]	ttttat [1252,1257]/ttttat [2364,2369]/ttttaat [2716,2722]	none	attatct [2474,2480]
3MMUR000043865_CR001337975 2114	atagt [681,685]/atagt [1255,1259]/gtagt [1661,1665]/gtag [1765,1768]/gtag [1794,1797]/gtag [1920,1923]/gtag [2015,2018]/gtag [2049,2052]	ttttat [129,134]/ttttat [482,487]	none	none
3MMUR000043930_CR001338678 408	none	ttttat [353,358]	none	none
3MMUR000047062_CR001641951 444	gtagt [120,124]	ttttat [375,380]	none	none
3MMUR000001217_CR000012170 1138	atagt [330,334]/atagt [488,492]/gtagt [761,765]	ttttat [710,715]/ttttat [1053,1058]	none	tttgtct [170,176]
3MMUR000000319_CR000003899 166	none	none	none	none
3MMUR000014124_CR000683282 196	none	ttttat [4,9]	none	none
3MMUR000015854_CR000697698 283	gttagt [189,194]/gttagt [276,281]	none	none	none
3MMUR000014586_CR000687341 953	gtagt [385,389]/atagt [757,761]/atttagt [877,883]	ttttat [693,698]/ttttcat [745,751]	none	none
3MMUR000012396_CR000669167 3065	atagt [677,681]/gtagt [697,701]/gtagt [1063,1067]/gtagt [1574,1578]/gtagt [2100,2104]/atagt [2644,2648]/atagt [2804,2808]	ttttat [470,475]/ttttat [2581,2586]/ttttat [2605,2610]/ttttat [2713,2718]	tgtaaata [2373,2380]/tgtaaata [2815,2822]	attatct [1034,1040]
3MMUR000014490_CR000686546 2287	atagt [689,693]/atagt [1341,1345]/gtttagt [1451,1457]/gtag [2030,2033]	ttttat [2181,2186]	none	none
3MMUR000040467_CR000984530 360	atagt [29,33]/attagt [345,350]	none	none	attgtct [58,64]
3MMUR000004774_CR000396777 420	atagt [105,109]	none	none	none
3MMUR000015563_CR000695286 698	gtag [82,85]/gtag [124,127]	ttttat [670,675]	none	attgtct [533,539]
3MMUR000001830_CR000017121 492	gtag [218,221]/gtag [331,334]	none	none	none
3MMUR000043794_CR001337187 451	none	none	tgtaaata [423,430]	none
3MMUR000017155_CR000712043 276	none	ttttat [218,223]	none	none
3MMUR000012791_CR000673221 1486	attagt [614,619]/attagt [1292,1297]	ttttat [161,166]/ttttat [200,205]/ttttat [529,534]/ttttat [795,800]/ttttat [983,988]/ttttat [1375,1380]/ttttcat [1455,1461]	none	none
3MMUR000008885_CR000633835 1400	gtagt [247,251]/gtagt [510,514]/atagt [519,523]/gtagt [1240,1244]/atagt [1285,1289]	ttttat [1356,1361]/ttttat [1372,1377]	none	none
3MMUR000016441_CR000703396 489	gtag [324,327]	none	none	none
3MMUR000045358_CR001447818 1008	atagt [982,986]	ttttat [886,891]	none	none
3MMUR000020482_CR000748349 310	gtag [14,17]	none	none	none
3MMUR000017249_CR000713185 1107	gtag [479,482]	ttttat [808,813]	tgtatata [800,807]	tttgtct [166,172]
3MMUR000000501_CR000005181 1598	atagt [496,500]/gtagt [1420,1424]	ttttaat [988,994]	none	none
3MMUR000044906_CR001444159 3604	atagt [3203,3207]	ttttat [1537,1542]/ttttat [2875,2880]	tgtatata [3532,3539]	attgtct [1274,1280]/tttatct [3130,3136]
3MMUR000005401_CR000401500 11	none	none	none	none
3MMUR000046773_CR001640582 182	none	none	none	none
3MMUR000007921_CR000622482 622	none	none	none	none
3MMUR000004803_CR000397057 171	none	ttttat [65,70]	none	tttatct [51,57]
3MMUR000010962_CR000656687 1192	atagt [200,204]/atagt [370,374]/atagt [647,651]/gtag [815,818]/gtag [1098,1101]	ttttaagt [1183,1190]	none	none
3MMUR000047474_CR001644026 327	none	none	none	none
3MMUR000020178_CR000744689 487	gtag [55,58]	none	none	none
3MMUR000010976_CR000656793 5988	gtagt [101,105]/atagt [711,715]/gtagt [951,955]/gtagt [1036,1040]/gtagt [1667,1671]/gtagt [2093,2097]/gtagt [2499,2503]/gtagt [3713,3717]/gtagt [3822,3826]/gtagt [4163,4167]/gtagt [4437,4441]/gtag [4506,4509]/gtag [4720,4723]/gtag [5618,5621]/gtag [5834,5837]	ttttat [5692,5697]	none	tttgtct [2931,2937]/tttgtct [3604,3610]
3MMUR000040042_CR000980921 1042	gtag [540,543]/gtag [593,596]/gtag [860,863]	ttttat [995,1000]	none	tttatct [671,677]
3MMUR000046581_CR001639621 15	none	none	none	none
3MMUR000042052_CR000997625 9832	gtagt [970,974]/atagt [1589,1593]/gtagt [2115,2119]/atagt [2976,2980]/atagt [2991,2995]/atagt [3108,3112]/gtagt [4032,4036]/gtagt [4368,4372]/gtagt [4602,4606]/gtagt [5004,5008]/atagt [5847,5851]/atagt [5877,5881]/atagt [5939,5943]/gtagt [6016,6020]/atagt [6193,6197]/gtagt [6591,6595]/gtagt [7096,7100]/atagt [7135,7139]/atagt [7231,7235]/gtagt [7323,7327]/atagt [7467,7471]/gtagt [9127,9131]/gtag …	ttttat [503,508]/ttttat [2699,2704]/ttttat [3587,3592]/ttttat [4045,4050]/ttttat [4381,4386]/ttttat [5082,5087]/ttttat [6875,6880]/ttttat [7011,7016]/ttttat [7186,7191]/ttttat [7255,7260]/ttttat [7964,7969]/ttttaaat [9032,9039]	tgtatata [5205,5212]/tgtatata [7130,7137]/tgtacata [8829,8836]	tttgtct [5899,5905]/tttatct [6135,6141]/tttgtct [7102,7108]/tttatct [7965,7971]/attgtct [8040,8046]/tttatct [9178,9184]
3MMUR000014608_CR000687508 1829	gtagt [1257,1261]/gtagt [1709,1713]/gtag [1729,1732]	ttttat [1800,1805]/ttttaat [1816,1822]	none	tttgtct [1300,1306]
3MMUR000005057_CR000399101 89	none	none	none	none
3MMUR000047245_CR001642918 319	none	none	none	none
3MMUR000005062_CR000399132 696	gtag [121,124]/gtag [247,250]	none	tgtaaata [454,461]	none
3MMUR000009412_CR000639826 4193	atagt [852,856]/atagt [1033,1037]/atagt [2064,2068]/atagt [2127,2131]/gtagt [2397,2401]/atagt [3056,3060]/atagt [3230,3234]/atagt [3494,3498]/atagt [3963,3967]	ttttat [25,30]/ttttat [33,38]/ttttat [45,50]/ttttat [1239,1244]/ttttat [2116,2121]/ttttat [2256,2261]/ttttat [2593,2598]/ttttat [2704,2709]/ttttaat [3623,3629]/ttttaaat [3639,3646]	tgtaaata [2122,2129]/tgtatata [2579,2586]	tttatct [836,842]/tttatct [1240,1246]/attgtct [2287,2293]/attgtct [2305,2311]/tttgtct [2619,2625]/tttgtct [3187,3193]/attgtct [3371,3377]/attgtct [3587,3593]
3MMUR000002696_CR000023829 84	none	none	none	none
3MMUR000000425_CR000004644 1023	gtagt [195,199]/gtagt [718,722]/gtag [724,727]	ttttat [387,392]/ttttat [405,410]/ttttat [644,649]	none	tttatct [388,394]/tttgtct [443,449]/tttgtct [825,831]
3MMUR000004825_CR000397212 51	none	none	none	none
3MMUR000009977_CR000645696 2100	gtttagt [349,355]/gtag [437,440]/gtag [854,857]/gtag [1299,1302]/gtag [1321,1324]	ttttat [1337,1342]/ttttat [1646,1651]	none	tttatct [1647,1653]
3MMUR000041600_CR000993722 78	none	none	none	none
3MMUR000013353_CR000677399 158	gtagt [16,20]/gtagt [67,71]	ttttat [32,37]	none	tttatct [33,39]
3MMUR000047460_CR001643961 134	none	none	none	none
3MMUR000002552_CR000022668 219	none	none	none	none
3MMUR000017686_CR000717940 2078	gtagt [293,297]/atagt [962,966]/atagt [1009,1013]/gttagt [1939,1944]	ttttat [1956,1961]/ttttat [2025,2030]	tgtaaata [653,660]	none
3MMUR000040940_CR000987960 165	gtagt [13,17]	ttttcat [64,70]	none	none
3MMUR000013908_CR000681610 55	none	none	none	none
3MMUR000017241_CR000713085 89	none	none	none	none
3MMUR000001933_CR000017893 320	none	none	none	none
3MMUR000000865_CR000007835 2333	atagt [1688,1692]/atagt [2096,2100]/atagt [2135,2139]	ttttat [469,474]	none	tttatct [470,476]
3MMUR000005391_CR000401442 742	gtagt [650,654]	ttttcat [693,699]	none	none
3MMUR000002112_CR000019243 920	atagt [404,408]/atagt [460,464]/atagt [652,656]/atagt [727,731]	ttttat [520,525]/ttttcat [774,780]	tgtagata [40,47]	attgtct [788,794]/tttatct [798,804]
3MMUR000003199_CR000050593 174	none	none	none	tttatct [132,138]
3MMUR000009480_CR000640456 375	gtag [262,265]/gtag [313,316]	none	none	none
3MMUR000017403_CR000714933 158	none	none	none	none
3MMUR000009826_CR000644145 2072	atagt [685,689]/atagt [1315,1319]/gtagt [1357,1361]/atagt [1873,1877]/gtag [1987,1990]	ttttat [335,340]/ttttat [614,619]/ttttat [1146,1151]/ttttat [1485,1490]/ttttat [1712,1717]	none	none
3MMUR000042384_CR001000396 2539	atagt [59,63]/atagt [374,378]/gtagt [929,933]/gtagt [2318,2322]	none	none	none
3MMUR000043116_CR001208861 1675	atagt [138,142]/gtagt [1548,1552]	ttttat [447,452]/ttttat [537,542]	none	none
3MMUR000002530_CR000022492 1562	gtagt [304,308]/gtagt [723,727]/attagt [1406,1411]	ttttaagt [592,599]	none	tttatct [1509,1515]
3MMUR000004672_CR000395723 1830	gtagt [797,801]/gtag [1150,1153]/gtag [1489,1492]/gtag [1738,1741]	none	none	none
3MMUR000007190_CR000618769 2494	gtag [654,657]/gtag [962,965]/gtag [1966,1969]	ttttat [804,809]	tgtatata [2212,2219]	none
3MMUR000045280_CR001447161 1815	atagt [1340,1344]/atagt [1704,1708]	none	none	none
3MMUR000041553_CR000993297 3132	gtagt [491,495]/gtagt [742,746]/gtagt [1126,1130]/gtagt [1475,1479]/atagt [2750,2754]/gttagt [2872,2877]	ttttaagt [2476,2483]/ttttcat [2762,2768]	tgtagata [2673,2680]	none
3MMUR000046709_CR001640258 499	atagt [338,342]	ttttat [84,89]/ttttat [246,251]	none	none
3MMUR000044520_CR001344215 2393	gtagt [730,734]/gtagt [846,850]/atagt [1519,1523]/gtag [1709,1712]/gtag [1863,1866]/gtag [2031,2034]	ttttat [1836,1841]	none	attatct [420,426]
3MMUR000043971_CR001339116 951	gtagt [141,145]/atagt [328,332]/gtagt [579,583]	ttttat [407,412]/ttttat [613,618]/ttttat [711,716]	none	tttatct [408,414]
3MMUR000043876_CR001338079 428	none	none	none	attgtct [238,244]
3MMUR000005343_CR000401116 318	gtagt [133,137]/gtag [289,292]	none	none	none
3MMUR000001399_CR000013686 1383	atagt [520,524]/atagt [993,997]/atagt [1160,1164]/attagt [1179,1184]/gttagt [1223,1228]	ttttat [141,146]/ttttat [1048,1053]	tgtacata [253,260]/tgtaaata [429,436]	attgtct [33,39]
3MMUR000009817_CR000644054 21	none	none	none	none
3MMUR000016500_CR000704057 2309	gtagt [1867,1871]	ttttat [117,122]/ttttat [712,717]/ttttat [787,792]/ttttat [2233,2238]	tgtagata [1055,1062]	none
3MMUR000047363_CR001643506 1933	atagt [1536,1540]/gtag [1715,1718]/gtag [1852,1855]	ttttat [1753,1758]	none	tttatct [1433,1439]
3MMUR000015415_CR000694007 1019	atagt [270,274]/atagt [872,876]/gtag [926,929]	ttttaat [743,749]/ttttact [764,770]	none	none
3MMUR000041284_CR000990936 891	gtagt [684,688]	ttttat [771,776]/ttttaat [830,836]	none	none
3MMUR000017261_CR000713313 514	gtagt [103,107]/gtagt [472,476]	ttttaat [453,459]	none	none
3MMUR000005645_CR000403162 1364	gtag [286,289]/gtag [755,758]	none	none	none
3MMUR000043136_CR001209091 21	none	none	none	none
3MMUR000006810_CR000616779 151	none	none	none	none
3MMUR000044781_CR001346453 1438	gtagt [1036,1040]	ttttat [307,312]/ttttat [958,963]	none	tttatct [936,942]
3MMUR000044771_CR001346358 129	gtagt [39,43]/gtagt [117,121]	none	none	none
3MMUR000001852_CR000017297 1545	atagt [811,815]/atagt [904,908]/gtagt [1340,1344]/gtagt [1350,1354]/gtagt [1443,1447]	ttttat [190,195]/ttttat [1186,1191]	none	none
3MMUR000041224_CR000990459 2909	atagt [357,361]/atagt [384,388]/gtagt [777,781]/gtagt [1843,1847]/gtagt [2601,2605]/gtag [2814,2817]	ttttat [505,510]/ttttat [763,768]/ttttaat [2321,2327]	none	attgtct [1226,1232]
3MMUR000020144_CR000744305 847	atagt [48,52]/atagt [591,595]/gtag [670,673]/gtag [829,832]	none	none	none
3MMUR000012114_CR000667135 470	gtag [202,205]	none	none	none
3MMUR000017225_CR000712872 443	gtagt [270,274]/gtag [278,281]	none	none	none
3MMUR000006389_CR000614660 698	gtag [486,489]	none	none	none
3MMUR000011248_CR000659210 5293	atagt [2263,2267]/atagt [2420,2424]/gtagt [2863,2867]/atagt [4518,4522]/atagt [5260,5264]	ttttat [999,1004]/ttttat [1044,1049]/ttttact [5082,5088]	tgtatata [412,419]/tgtatata [674,681]/tgtaaata [4374,4381]/tgtaaata [4385,4392]	attgtct [3057,3063]
3MMUR000019067_CR000733154 151	none	none	none	none
3MMUR000040813_CR000987032 402	gtag [8,11]	none	none	none
3MMUR000041860_CR000995957 748	gttagt [202,207]/gtag [520,523]	none	tgtacata [406,413]	none
3MMUR000000367_CR000004251 232	atagt [24,28]	none	none	none
3MMUR000010299_CR000649377 1418	atagt [211,215]/atttagt [949,955]/atttagt [1011,1017]	ttttat [63,68]/ttttaat [734,740]/ttttaat [754,760]	none	none
3MMUR000045655_CR001450140 1744	gtagt [1404,1408]/atagt [1447,1451]/atagt [1452,1456]/atagt [1628,1632]/gtag [1636,1639]	ttttat [1675,1680]	none	none
3MMUR000016051_CR000699406 143	atagt [24,28]/gtag [30,33]	none	none	none
3MMUR000009205_CR000637420 301	gtagt [90,94]/atagt [247,251]	none	none	none
3MMUR000019509_CR000738087 1395	gtagt [386,390]/gttagt [511,516]	ttttaat [1309,1315]	none	attgtct [208,214]
3MMUR000045435_CR001448468 4873	atagt [526,530]/atagt [1067,1071]/gtagt [1096,1100]/gtagt [1711,1715]/atagt [3751,3755]/gtagt [4023,4027]/gtag [4118,4121]/gtag [4193,4196]	ttttat [871,876]/ttttat [913,918]/ttttat [1688,1693]/ttttat [2528,2533]/ttttat [2759,2764]/ttttat [3045,3050]/ttttat [3773,3778]/ttttat [4748,4753]	none	attatct [2321,2327]
3MMUR000020286_CR000745986 3320	gtagt [297,301]/atagt [333,337]/gtagt [973,977]/atagt [1366,1370]/atagt [1981,1985]/atagt [2095,2099]/gtagt [2262,2266]/atagt [2914,2918]	ttttat [1958,1963]/ttttaat [3167,3173]	tgtatata [2909,2916]/tgtaaata [3294,3301]	attatct [3110,3116]
3MMUR000010864_CR000655646 50	none	none	none	tttgtct [32,38]
3MMUR000043664_CR001335590 3576	gtagt [120,124]/atagt [153,157]/atagt [1575,1579]/atagt [1992,1996]/gtagt [2936,2940]/gtagt [3017,3021]/gtagt [3488,3492]/atagt [3537,3541]	ttttat [136,141]/ttttat [1169,1174]/ttttat [1713,1718]/ttttat [1967,1972]/ttttat [2402,2407]	none	tttatct [1136,1142]
3MMUR000000647_CR000006294 2632	atagt [2320,2324]/atagt [2572,2576]	ttttat [1309,1314]/ttttat [1602,1607]/ttttat [2505,2510]/ttttaat [2608,2614]	none	tttgtct [550,556]/tttatct [2506,2512]
3MMUR000002624_CR000023275 21	none	none	none	none
3MMUR000019315_CR000735824 4043	gtagt [364,368]/atagt [521,525]/atagt [1197,1201]/gtagt [1524,1528]/atagt [3894,3898]	ttttat [1206,1211]/ttttat [2731,2736]/ttttat [3924,3929]/ttttaaat [3957,3964]	tgtaaata [504,511]/tgtaaata [1319,1326]	attgtct [2027,2033]/tttgtct [4013,4019]
3MMUR000013978_CR000682171 48	none	none	none	none
3MMUR000045666_CR001450222 1329	gtagt [666,670]/atagt [1285,1289]	ttttaat [510,516]	none	none
3MMUR000012453_CR000669823 182	none	none	none	none
3MMUR000013790_CR000680723 371	none	none	none	none
3MMUR000010464_CR000651213 929	atagt [28,32]/atagt [420,424]/gtagt [580,584]/gtagt [673,677]/gtagt [681,685]/gtag [702,705]	ttttat [268,273]/ttttat [430,435]/ttttcat [445,451]	none	none
3MMUR000000203_CR000003012 500	none	none	none	none
3MMUR000021280_CR000756815 1009	atagt [647,651]	none	none	tttatct [380,386]/tttgtct [970,976]
3MMUR000002072_CR000018957 3475	gtagt [218,222]/atagt [1780,1784]/atagt [2208,2212]/atagt [2221,2225]/gtagt [2275,2279]/atagt [2423,2427]/gtag [2848,2851]/gtag [3069,3072]/gtag [3291,3294]	ttttat [25,30]/ttttat [1528,1533]/ttttat [3099,3104]	tgtaaata [135,142]/tgtatata [201,208]/tgtatata [1396,1403]/tgtacata [2414,2421]	tttgtct [1972,1978]/attatct [2564,2570]/tttgtct [2841,2847]/tttatct [3100,3106]
3MMUR000042165_CR000998509 354	none	ttttat [147,152]	none	attgtct [282,288]
3MMUR000016558_CR000704720 1193	gtagt [317,321]/atagt [594,598]/gtag [870,873]	ttttat [665,670]/ttttat [977,982]	none	none
3MMUR000001475_CR000014354 6057	gtagt [145,149]/atagt [151,155]/atagt [1254,1258]/gtagt [1555,1559]/atagt [1581,1585]/atagt [2128,2132]/atagt [3176,3180]/gtagt [3915,3919]/atagt [3969,3973]/gtagt [4283,4287]/atagt [4317,4321]/atagt [5404,5408]/gtag [5428,5431]/gtag [5582,5585]	ttttat [251,256]/ttttat [579,584]/ttttat [848,853]/ttttat [854,859]/ttttat [861,866]/ttttat [906,911]/ttttat [1174,1179]/ttttat [1419,1424]/ttttat [2709,2714]/ttttat [4589,4594]/ttttact [4655,4661]/ttttact [5498,5504]	tgtatata [262,269]/tgtaaata [912,919]/tgtaaata [2259,2266]	tttatct [2727,2733]/tttgtct [2917,2923]/tttgtct [5788,5794]/tttgtct [5816,5822]
3MMUR000017025_CR000710364 1020	gtagt [305,309]/gtagt [903,907]	ttttaat [915,921]	none	none
3MMUR000018676_CR000728934 556	atagt [76,80]/gtag [399,402]	none	tgtaaata [128,135]	none
3MMUR000046992_CR001641601 2096	atagt [898,902]/atagt [1434,1438]/atagt [1925,1929]	ttttat [2087,2092]	none	attatct [827,833]/attgtct [1712,1718]/tttgtct [1943,1949]
3MMUR000001625_CR000015624 871	gtagt [421,425]/gtag [743,746]	none	none	none
3MMUR000014644_CR000687917 139	none	ttttaagt [127,134]	none	none
3MMUR000047001_CR001641651 213	none	none	none	none
3MMUR000008357_CR000628337 2783	gtagt [977,981]/gtagt [1222,1226]/attagt [1992,1997]	ttttaagt [1563,1570]	none	none
3MMUR000019210_CR000734779 4665	gtagt [430,434]/atagt [818,822]/gtagt [2228,2232]/atagt [2236,2240]/atagt [2694,2698]/gtagt [3312,3316]/attagt [3504,3509]/gtag [3990,3993]	ttttat [1393,1398]/ttttat [1407,1412]/ttttat [1476,1481]/ttttat [1864,1869]/ttttat [1894,1899]/ttttaat [2947,2953]	none	attgtct [4168,4174]
3MMUR000017076_CR000711070 1046	none	none	none	none
3MMUR000009327_CR000638906 157	none	none	none	none
3MMUR000046513_CR001639290 154	none	none	tgtaaata [91,98]	none
3MMUR000043807_CR001337351 1028	gtagt [322,326]/gtagt [764,768]	ttttaagt [557,564]	none	none
3MMUR000046836_CR001640888 117	gtagt [75,79]	none	none	none
3MMUR000046367_CR001638578 286	none	ttttat [255,260]	none	none
3MMUR000039633_CR000977640 964	atagt [448,452]/atagt [795,799]/atagt [810,814]/atagt [898,902]/atagt [910,914]	ttttat [157,162]/ttttat [259,264]/ttttat [765,770]/ttttat [861,866]/ttttat [891,896]	none	attgtct [758,764]
3MMUR000016709_CR000706594 110	none	none	none	none
3MMUR000046296_CR001638224 660	gtag [18,21]/gtag [222,225]/gtag [444,447]/gtag [522,525]	ttttaaat [633,640]	none	none
3MMUR000008895_CR000633925 79	gtag [22,25]	none	none	none
3MMUR000011287_CR000659750 194	atttagt [174,180]	none	none	none
3MMUR000040517_CR000984938 960	attagt [875,880]	ttttat [871,876]	none	none
3MMUR000040310_CR000983280 175	atagt [120,124]	ttttat [150,155]	none	tttgtct [44,50]
3MMUR000001481_CR000014396 1966	gtagt [679,683]/gtagt [777,781]/gtag [925,928]/gtag [971,974]/gtag [1486,1489]	ttttat [900,905]/ttttat [1895,1900]	none	tttatct [901,907]
3MMUR000002570_CR000022828 47	atagt [29,33]	ttttat [4,9]	none	none
3MMUR000008918_CR000634149 223	gtagt [212,216]	none	none	none
3MMUR000016287_CR000701574 63	none	none	none	none
3MMUR000012338_CR000668771 801	gtagt [730,734]	ttttaat [93,99]	none	none
3MMUR000009481_CR000640461 1310	gtagt [465,469]/gtagt [1077,1081]	none	none	none
3MMUR000004486_CR000392844 4998	gtagt [295,299]/atagt [789,793]/atagt [1020,1024]/atagt [1748,1752]/atagt [2096,2100]/gtagt [2416,2420]/gtagt [2912,2916]/atagt [2959,2963]/atagt [3050,3054]/gtagt [3251,3255]/atagt [3412,3416]/atagt [3893,3897]/atagt [4033,4037]/atagt [4850,4854]	ttttat [750,755]/ttttat [2038,2043]/ttttat [2393,2398]/ttttat [3037,3042]/ttttat [3080,3085]/ttttat [3780,3785]/ttttat [4300,4305]/ttttat [4780,4785]/ttttat [4958,4963]	none	tttgtct [400,406]/tttatct [751,757]/attgtct [1323,1329]/tttatct [4959,4965]
3MMUR000019320_CR000735880 231	none	ttttcat [61,67]	none	tttgtct [74,80]
3MMUR000018679_CR000728964 4165	atagt [157,161]/gtagt [677,681]/gtagt [967,971]/gtagt [2379,2383]/gtagt [3185,3189]/gtagt [3681,3685]/gtag [3876,3879]	ttttat [273,278]/ttttat [738,743]/ttttat [2039,2044]/ttttat [2818,2823]/ttttat [2979,2984]/ttttat [3001,3006]/ttttat [3073,3078]/ttttat [4036,4041]/ttttaagt [4156,4163]	tgtatata [4053,4060]/tgtaaata [4135,4142]	tttgtct [383,389]/tttatct [739,745]/tttgtct [753,759]/tttatct [2980,2986]/tttatct [4037,4043]
3MMUR000013215_CR000676458 1262	gtagt [1093,1097]/atagt [1105,1109]	ttttat [1139,1144]	none	none
3MMUR000006459_CR000614997 1834	atagt [498,502]/atagt [626,630]/atagt [697,701]/gtagt [1195,1199]/gtagt [1771,1775]	ttttat [871,876]/ttttact [877,883]/ttttcat [905,911]/ttttcat [1514,1520]/ttttcat [1810,1816]	none	none
3MMUR000044339_CR001342672 1633	gtag [104,107]/gtag [666,669]/gtag [678,681]/gtag [985,988]	ttttat [356,361]/ttttat [881,886]	none	tttatct [491,497]/attatct [556,562]
3MMUR000010572_CR000652357 200	none	ttttaaat [172,179]	none	none
3MMUR000001359_CR000013359 388	none	none	none	none
3MMUR000015335_CR000693327 3882	atagt [483,487]/atagt [1676,1680]/atagt [2466,2470]/gtagt [3081,3085]/atagt [3111,3115]/gtag [3796,3799]	ttttat [331,336]/ttttat [586,591]/ttttat [1298,1303]/ttttat [1355,1360]/ttttat [2566,2571]/ttttaat [3492,3498]/ttttaagt [3831,3838]	tgtaaata [2637,2644]	tttgtct [416,422]/attatct [871,877]/attgtct [1010,1016]/tttgtct [1275,1281]/tttatct [1299,1305]
3MMUR000001966_CR000018148 1456	gtagt [800,804]/gtag [1129,1132]	ttttcat [1180,1186]	none	attgtct [387,393]
3MMUR000016035_CR000699275 2356	gtagt [1606,1610]/atagt [1820,1824]/gtagt [1996,2000]/gtag [2117,2120]/gtag [2287,2290]	ttttat [1276,1281]/ttttat [1469,1474]/ttttaat [1887,1893]	none	tttatct [844,850]/attgtct [2332,2338]
3MMUR000007638_CR000620944 33	none	none	none	none
3MMUR000042849_CR001055566 295	attagt [82,87]	none	none	none
3MMUR000009028_CR000635354 677	gtag [421,424]/gtag [569,572]/gtag [598,601]	none	none	tttgtct [156,162]
3MMUR000016223_CR000700868 538	none	none	none	none
3MMUR000020811_CR000752133 934	gtag [494,497]/gtag [517,520]/gtag [740,743]	ttttcat [193,199]	none	tttgtct [833,839]
3MMUR000015777_CR000697060 5422	atagt [1893,1897]/gtagt [2233,2237]/atagt [2362,2366]/atagt [3888,3892]/gtagt [3931,3935]/atagt [4304,4308]/atagt [4601,4605]/gttagt [5254,5259]/gtag [5351,5354]	ttttat [1205,1210]/ttttat [2330,2335]/ttttaat [2408,2414]/ttttaat [3971,3977]/ttttaat [4282,4288]	tgtacata [2389,2396]	attatct [511,517]/tttatct [3520,3526]
3MMUR000017151_CR000711973 354	gtag [117,120]	ttttcat [327,333]	none	none
3MMUR000003020_CR000029363 366	gtag [185,188]	none	none	none
3MMUR000047160_CR001642462 1115	atagt [223,227]/gtag [391,394]/gtag [678,681]	none	none	tttatct [215,221]
3MMUR000016129_CR000700002 2816	atagt [449,453]/atagt [914,918]/atagt [1399,1403]/atagt [1757,1761]/gtag [2142,2145]/gtag [2165,2168]/gtag [2621,2624]	none	none	none
3MMUR000016545_CR000704562 891	atagt [435,439]	ttttat [431,436]/ttttat [449,454]/ttttat [472,477]/ttttat [823,828]/ttttaaat [855,862]	none	attgtct [696,702]
3MMUR000044010_CR001339505 82	none	none	none	none
3MMUR000019527_CR000738264 212	gtag [71,74]	ttttat [159,164]/ttttat [201,206]	none	none
3MMUR000021292_CR000756878 203	none	none	none	none
3MMUR000045020_CR001445096 722	gtag [182,185]/gtag [223,226]/gtag [283,286]/gtag [374,377]	none	tgtacata [660,667]	none
3MMUR000040255_CR000982782 2057	gtagt [552,556]/atagt [1018,1022]/gtagt [1463,1467]/gtag [1541,1544]/gtag [1807,1810]/gtag [1950,1953]	ttttat [1011,1016]	none	tttgtct [296,302]
3MMUR000017250_CR000713203 1354	atagt [11,15]/atagt [1271,1275]	ttttaat [891,897]/ttttaagt [1302,1309]	none	tttatct [940,946]
3MMUR000041091_CR000989001 39	none	none	none	none
3MMUR000006840_CR000616977 192	gtag [64,67]/gtag [141,144]	none	none	none
3MMUR000011281_CR000659534 5155	gtagt [1194,1198]/atagt [1788,1792]/atagt [2039,2043]/atagt [4347,4351]/gtagt [4680,4684]/attagt [4696,4701]/gtag [4717,4720]	ttttat [661,666]/ttttat [884,889]/ttttat [943,948]/ttttat [1138,1143]/ttttat [1351,1356]/ttttat [2050,2055]/ttttat [5070,5075]	tgtaaata [1279,1286]/tgtatata [4651,4658]	attgtct [5042,5048]
3MMUR000001692_CR000016107 1196	atagt [1011,1015]/gtag [1189,1192]	none	tgtaaata [1006,1013]	none
3MMUR000002166_CR000019655 2937	gtagt [148,152]/atagt [773,777]/gtagt [1134,1138]/gtagt [1377,1381]/gtagt [1792,1796]/atagt [2451,2455]/gtag [2474,2477]/gtag [2541,2544]/gtag [2702,2705]	ttttat [208,213]/ttttat [965,970]/ttttat [1138,1143]/ttttat [2186,2191]/ttttcat [2233,2239]	none	attgtct [496,502]/tttgtct [1597,1603]/tttgtct [2546,2552]/tttgtct [2682,2688]
3MMUR000013157_CR000676054 284	none	none	none	tttgtct [64,70]
3MMUR000008691_CR000631915 5170	atagt [1566,1570]/atagt [4004,4008]/atagt [4787,4791]	ttttat [3860,3865]/ttttat [4984,4989]/ttttat [5116,5121]	none	tttgtct [2044,2050]/tttatct [4462,4468]
3MMUR000043852_CR001337836 4459	gtagt [542,546]/atagt [974,978]/gtagt [2598,2602]/atagt [3392,3396]/atagt [4238,4242]/atagt [4313,4317]	ttttat [722,727]/ttttat [1422,1427]/ttttat [2125,2130]/ttttat [3836,3841]/ttttat [4305,4310]	tgtacata [996,1003]	tttgtct [713,719]
3MMUR000017047_CR000710633 1956	gtagt [914,918]/gtagt [1771,1775]/attagt [1781,1786]	ttttat [427,432]/ttttat [1946,1951]	none	none
3MMUR000015717_CR000696568 1596	atagt [1045,1049]/gtag [1111,1114]	ttttat [31,36]/ttttat [1384,1389]	none	none
3MMUR000039816_CR000979089 617	attagt [213,218]/gtag [535,538]	ttttaat [601,607]	none	none
3MMUR000043036_CR001056957 914	gtag [104,107]/gtag [676,679]	ttttat [352,357]	none	tttatct [282,288]
3MMUR000017812_CR000719376 2140	gtagt [477,481]/atagt [719,723]/attagt [958,963]/gtag [1120,1123]	ttttat [178,183]/ttttat [339,344]/ttttat [1099,1104]/ttttat [1274,1279]/ttttat [1281,1286]/ttttat [1303,1308]/ttttat [1972,1977]	tgtaaata [267,274]/tgtatata [318,325]/tgtaaata [2078,2085]	tttatct [179,185]/attgtct [1158,1164]/tttatct [1275,1281]/tttatct [1282,1288]/tttgtct [1615,1621]
3MMUR000012521_CR000670632 721	gtag [244,247]	none	none	none
3MMUR000019918_CR000742142 1664	gttagt [315,320]/gttagt [881,886]/gttagt [975,980]/gtag [1257,1260]/gtag [1287,1290]/gtag [1496,1499]	none	none	none
3MMUR000040801_CR000986958 359	gtagt [142,146]	none	none	none
3MMUR000017649_CR000717539 120	none	none	none	none
3MMUR000012005_CR000666335 252	none	none	none	none
3MMUR000007356_CR000619576 375	gtag [223,226]	none	none	none
3MMUR000042493_CR001001340 898	gtagt [540,544]/atagt [849,853]	ttttat [772,777]	none	tttgtct [257,263]
3MMUR000005658_CR000403245 334	none	ttttact [29,35]	none	none
3MMUR000011856_CR000665222 2385	gtagt [199,203]/gtagt [280,284]/atagt [521,525]/gtagt [600,604]/atagt [714,718]/atagt [1024,1028]/gtagt [1287,1291]/atagt [1646,1650]/atagt [1928,1932]/gttagt [2332,2337]	ttttat [1066,1071]/ttttat [2298,2303]	none	attatct [828,834]/tttatct [2299,2305]
3MMUR000042775_CR001054156 938	gtagt [674,678]/gtag [737,740]	none	none	none
3MMUR000047077_CR001642027 87	none	none	none	none
3MMUR000011374_CR000661327 1406	atagt [179,183]/gtagt [279,283]/gtag [700,703]/gtag [1050,1053]/gtag [1149,1152]/gtag [1169,1172]	none	none	none
3MMUR000046344_CR001638456 251	gtag [205,208]	ttttcat [16,22]	none	none
3MMUR000044729_CR001346008 913	gtagt [598,602]/gtag [844,847]	ttttcat [52,58]	none	none
3MMUR000046358_CR001638532 1248	gtagt [706,710]/atagt [1112,1116]/gtagt [1181,1185]	ttttat [760,765]/ttttat [1028,1033]	none	tttgtct [981,987]
3MMUR000020820_CR000752247 147	atagt [97,101]	none	none	tttgtct [135,141]
3MMUR000004375_CR000334980 473	gtag [226,229]/gtag [374,377]	none	none	none
3MMUR000010379_CR000650172 1992	atagt [733,737]/gtagt [1424,1428]	ttttaat [1555,1561]	none	tttgtct [1568,1574]
3MMUR000008944_CR000634457 3148	gtagt [494,498]/atagt [814,818]/atagt [1247,1251]/gtagt [1604,1608]/atagt [1701,1705]/gtag [2660,2663]/gtag [2795,2798]	ttttat [1697,1702]/ttttact [2066,2072]	none	tttatct [753,759]
3MMUR000014219_CR000684063 169	gtag [15,18]	none	none	none
3MMUR000041858_CR000995940 624	gtagt [289,293]/gtagt [426,430]/gtag [437,440]	ttttat [558,563]	none	none
3MMUR000047286_CR001643118 275	gtagt [31,35]/gtag [161,164]	none	none	tttatct [212,218]
3MMUR000041594_CR000993682 331	none	ttttat [102,107]/ttttat [286,291]/ttttat [296,301]	none	tttatct [308,314]
3MMUR000002095_CR000019115 3386	atagt [30,34]/atagt [451,455]/atagt [907,911]/gtagt [1435,1439]/atagt [1975,1979]/gtagt [2164,2168]/atagt [2700,2704]/atagt [3341,3345]	ttttat [228,233]/ttttat [470,475]/ttttat [856,861]/ttttat [1196,1201]/ttttat [1424,1429]/ttttat [1440,1445]/ttttat [1662,1667]/ttttat [2428,2433]/ttttat [2839,2844]/ttttat [2970,2975]/ttttat [2986,2991]/ttttat [3031,3036]/ttttat [3046,3051]/ttttat [3210,3215]/ttttaagt [3283,3290]	none	tttgtct [266,272]/tttatct [1279,1285]/tttgtct [3158,3164]
3MMUR000005157_CR000399811 1498	atttagt [831,837]/gtag [1088,1091]	ttttat [1029,1034]/ttttat [1286,1291]/ttttaat [1376,1382]	none	none
3MMUR000007052_CR000618045 1016	gtag [127,130]/gtag [226,229]/gtag [814,817]	ttttact [638,644]	none	none
3MMUR000009414_CR000639845 54	none	none	none	none
3MMUR000004671_CR000395717 1782	gtagt [314,318]/atagt [1100,1104]/atagt [1205,1209]/atagt [1356,1360]/atagt [1543,1547]/gtag [1590,1593]	ttttat [440,445]/ttttat [874,879]/ttttat [1222,1227]/ttttat [1229,1234]/ttttat [1281,1286]/ttttat [1645,1650]/ttttat [1723,1728]	tgtagata [1400,1407]	tttgtct [849,855]
3MMUR000014287_CR000684791 128	none	none	none	none
3MMUR000039993_CR000980496 510	none	ttttat [151,156]/ttttat [299,304]	tgtacata [230,237]	none
3MMUR000005102_CR000399422 1901	gtagt [608,612]/attagt [1042,1047]/atttagt [1256,1262]	ttttat [851,856]/ttttat [1295,1300]/ttttat [1737,1742]	none	tttatct [1738,1744]
3MMUR000020533_CR000749025 2471	atagt [441,445]/atagt [1065,1069]/atagt [1256,1260]/gtag [1292,1295]/gtag [1560,1563]/gtag [1584,1587]	ttttat [1444,1449]/ttttat [2081,2086]/ttttat [2460,2465]	tgtacata [569,576]	tttgtct [38,44]/attgtct [449,455]
3MMUR000002951_CR000026596 593	atagt [186,190]/gtagt [197,201]	ttttat [535,540]	none	none
3MMUR000010026_CR000646177 72	none	none	none	none
3MMUR000017207_CR000712690 2786	gtagt [372,376]/atagt [421,425]/gtagt [744,748]/atagt [1019,1023]/atagt [1569,1573]/attagt [2198,2203]/gtag [2277,2280]/gtag [2525,2528]	ttttat [1236,1241]/ttttat [1558,1563]/ttttat [2041,2046]/ttttat [2066,2071]/ttttat [2444,2449]/ttttat [2482,2487]/ttttat [2569,2574]	tgtagata [2524,2531]	tttatct [2084,2090]/attgtct [2338,2344]/attatct [2776,2782]
3MMUR000000409_CR000004545 808	gtag [122,125]/gtag [618,621]/gtag [742,745]	ttttat [630,635]	none	none
3MMUR000008317_CR000627871 1304	gtag [203,206]/gtag [470,473]/gtag [728,731]/gtag [1135,1138]	none	none	none
[truncated: 25,542 more rows]

## Sheet: Xenopus
Data analysis information:
[truncated: 26,520 more rows]
